# Supplementary material for: Biophysical and in silico characterization of NrtA: a protein-based host for aqueous nitrate and nitrite recognition
Source: Royal Society of Chemistry journal article supplement (doi:10.1039/d1cc05879g), 2021-12-13
Supplement: d1cc05879g2.xlsx [file d1cc05879g2.xlsx]

## Sheet: apo_run1
Residue number	57	58	59	60	61	62	63	64	65	66	67	68	69	70	71	72	73	74	75	76	77	78	79	80	81	82	83	84	85	86	87	88	89	90	91	92	93	94	95	96	97	98	99	100	101	102	103	104	105
57	1	0.904522	0.621354	0.497967	0.248677	0.0946806	0.0537123	-0.034657	-0.0265911	-0.0653024	-0.0481531	-0.0758305	-0.0717476	-0.0769968	-0.0853642	-0.0726411	-0.0986875	-0.125708	-0.125435	-0.169552	-0.155007	-0.14688	-0.144225	-0.147582	-0.126755	-0.1088	-0.108507	-0.0933272	-0.116092	-0.10752	-0.0739619	-0.0740494	-0.0946538	-0.0714777	-0.0815831	-0.0315042	-0.00847448	-0.0356718	-0.0451475	-0.0426897	-0.0718986	-0.0365328	-0.0611506	-0.052505	-0.0745019	-0.100414	-0.0804833	-0.0730013	-0.0939873
58	0.904522	1	0.757752	0.545556	0.321132	0.149688	0.0928842	-0.00493058	-0.0100115	-0.0596854	-0.0433684	-0.080307	-0.0772758	-0.0858869	-0.0875855	-0.0738165	-0.104497	-0.137807	-0.139669	-0.180438	-0.158324	-0.1487	-0.152187	-0.149054	-0.11952	-0.108154	-0.110147	-0.0799667	-0.106133	-0.0730185	-0.0361966	-0.0487591	-0.0701757	-0.0369841	-0.0415037	0.000401271	0.0211542	-0.00689555	-0.0259021	-0.0274457	-0.0617626	-0.0316485	-0.0576216	-0.0540032	-0.085302	-0.114446	-0.0946217	-0.0792882	-0.0922572
59	0.621354	0.757752	1	0.78061	0.489558	0.307568	0.20061	0.0490002	0.0285092	-0.033622	-0.0234339	-0.0784241	-0.0715876	-0.0850231	-0.089581	-0.0689864	-0.0931533	-0.112719	-0.120264	-0.171104	-0.127567	-0.124769	-0.136343	-0.115127	-0.0628187	-0.0604961	-0.044923	-0.00269856	-0.0446832	-0.0111314	0.0348573	-0.00084944	-0.0191299	0.0253107	0.036055	0.0667502	0.100687	0.0597799	-0.00823502	0.00896811	-0.0362219	-0.00689613	-0.0356816	-0.048254	-0.0834495	-0.115093	-0.0852314	-0.0652341	-0.0774558
60	0.497967	0.545556	0.78061	1	0.747261	0.53154	0.376625	0.175359	0.116243	0.0326658	0.0086728	-0.0665669	-0.0822873	-0.129727	-0.156627	-0.135113	-0.139905	-0.12391	-0.0939815	-0.141187	-0.0712723	-0.0814102	-0.0912341	-0.0511275	0.00724472	0.000363873	0.0238617	0.07274	0.0423334	0.0934373	0.158457	0.105592	0.0851325	0.154556	0.176137	0.213875	0.253247	0.186713	0.0745288	0.0587387	-0.00776497	0.0104991	-0.019119	-0.0488779	-0.10057	-0.147655	-0.0996652	-0.0580767	-0.0730496
61	0.248677	0.321132	0.489558	0.747261	1	0.79463	0.648835	0.417905	0.314191	0.205561	0.110117	-0.00554342	-0.0708686	-0.194178	-0.260193	-0.264847	-0.248208	-0.171185	-0.0692179	-0.0756875	0.0196273	0.000466957	-0.0271719	0.0440671	0.107083	0.068412	0.0887723	0.172245	0.173384	0.27298	0.345705	0.255625	0.241734	0.34138	0.40242	0.432109	0.506718	0.426309	0.2591	0.208657	0.125876	0.0788979	0.0563889	-0.00031176	-0.0839816	-0.155598	-0.085776	-0.0111267	-0.018518
62	0.0946806	0.149688	0.307568	0.53154	0.79463	1	0.783075	0.533974	0.400642	0.289455	0.172067	0.039075	-0.0408999	-0.185527	-0.258156	-0.264512	-0.232338	-0.134701	-0.0313443	-0.0262391	0.0861584	0.066237	0.0336234	0.114744	0.163804	0.136533	0.166544	0.244458	0.275261	0.390613	0.46873	0.357783	0.358866	0.475478	0.583146	0.615268	0.667908	0.57597	0.375523	0.29131	0.194952	0.132482	0.108989	0.0397626	-0.053608	-0.13566	-0.0497897	0.0371636	0.0288414
63	0.0537123	0.0928842	0.20061	0.376625	0.648835	0.783075	1	0.759478	0.599281	0.47162	0.325442	0.150571	0.0489614	-0.128335	-0.213619	-0.204339	-0.168193	-0.0575134	0.0295936	0.0284388	0.149854	0.116726	0.0743503	0.150573	0.179655	0.137604	0.153405	0.212182	0.252882	0.367533	0.416014	0.293593	0.273371	0.378753	0.51857	0.599068	0.747464	0.692424	0.526112	0.446791	0.352036	0.269873	0.241046	0.159488	0.0679743	-0.0322304	0.0590765	0.160254	0.152494
64	-0.034657	-0.00493058	0.0490002	0.175359	0.417905	0.533974	0.759478	1	0.766261	0.575043	0.409939	0.220273	0.103725	-0.0579301	-0.150509	-0.13153	-0.0995692	0.00405257	0.0598732	0.0595657	0.171075	0.126224	0.0744084	0.128148	0.139563	0.0921074	0.0843115	0.116024	0.172867	0.278657	0.285738	0.215133	0.235194	0.311575	0.420525	0.434536	0.584419	0.706584	0.660434	0.537099	0.435617	0.325786	0.29718	0.199185	0.129306	0.0549186	0.14402	0.240686	0.252129
65	-0.0265911	-0.0100115	0.0285092	0.116243	0.314191	0.400642	0.599281	0.766261	1	0.794162	0.614102	0.389179	0.198159	-0.0136609	-0.118773	-0.0942369	-0.0372795	0.090137	0.136781	0.114702	0.224347	0.17825	0.121473	0.158506	0.150184	0.10525	0.0843163	0.0932582	0.144826	0.242049	0.239795	0.157766	0.1516	0.220752	0.340295	0.395754	0.541097	0.660083	0.728874	0.647118	0.626354	0.509194	0.475441	0.353896	0.273822	0.171141	0.247381	0.365716	0.384682
66	-0.0653024	-0.0596854	-0.033622	0.0326658	0.205561	0.289455	0.47162	0.575043	0.794162	1	0.779827	0.547336	0.324143	0.075843	-0.0407479	-0.0207919	0.048045	0.185927	0.233178	0.203265	0.282283	0.250303	0.195456	0.208992	0.188711	0.143619	0.11927	0.109887	0.158593	0.229856	0.208697	0.132902	0.103125	0.141143	0.258424	0.3482	0.473127	0.571799	0.623085	0.730389	0.696463	0.599372	0.553856	0.425333	0.359657	0.257238	0.30076	0.403329	0.428932
67	-0.0481531	-0.0433684	-0.0234339	0.0086728	0.110117	0.172067	0.325442	0.409939	0.614102	0.779827	1	0.698626	0.404813	0.15179	0.0449934	0.0703008	0.143951	0.263193	0.258102	0.171887	0.217542	0.204731	0.159536	0.138975	0.125415	0.0985908	0.0817234	0.0599728	0.0908631	0.12877	0.103685	0.0346932	-0.00693545	0.0245154	0.138574	0.233826	0.344974	0.415346	0.494671	0.65127	0.712586	0.689759	0.682297	0.532122	0.494159	0.387873	0.409082	0.496726	0.52619
68	-0.0758305	-0.080307	-0.0784241	-0.0665669	-0.00554342	0.039075	0.150571	0.220273	0.389179	0.547336	0.698626	1	0.709518	0.357839	0.187212	0.176492	0.232238	0.307606	0.284132	0.197215	0.202463	0.230505	0.179955	0.123706	0.122738	0.111587	0.0764523	0.0487343	0.0479217	0.0546047	0.0258491	-0.0225709	-0.072518	-0.0566169	0.0246864	0.104659	0.188423	0.238805	0.315087	0.487244	0.557858	0.64356	0.611044	0.488668	0.482888	0.41493	0.372562	0.414296	0.447521
69	-0.0717476	-0.0772758	-0.0715876	-0.0822873	-0.0708686	-0.0408999	0.0489614	0.103725	0.198159	0.324143	0.404813	0.709518	1	0.670416	0.462836	0.415613	0.342541	0.361545	0.2683	0.180808	0.184937	0.243512	0.16739	0.0918994	0.132382	0.132831	0.0660559	0.0292627	-0.0312573	-0.024034	-0.0468227	-0.103928	-0.152659	-0.129341	-0.0655017	0.00412905	0.0694913	0.105757	0.142665	0.296078	0.367189	0.502881	0.48855	0.414227	0.472945	0.453821	0.392983	0.383546	0.409282
70	-0.0769968	-0.0858869	-0.0850231	-0.129727	-0.194178	-0.185527	-0.128335	-0.0579301	-0.0136609	0.075843	0.15179	0.357839	0.670416	1	0.724776	0.621406	0.405743	0.311194	0.164564	0.0790482	0.030663	0.127397	0.0702586	-0.0259542	0.0196157	0.0496718	0.0008772	-0.0526332	-0.129915	-0.167338	-0.183874	-0.206798	-0.242679	-0.235142	-0.214295	-0.17682	-0.134817	-0.0918589	-0.0537974	0.0704803	0.12244	0.230348	0.213395	0.197676	0.295792	0.337434	0.280044	0.233056	0.244349
71	-0.0853642	-0.0875855	-0.089581	-0.156627	-0.260193	-0.258156	-0.213619	-0.150509	-0.118773	-0.0407479	0.0449934	0.187212	0.462836	0.724776	1	0.87587	0.687417	0.472574	0.197811	0.0870999	0.0161442	0.0826848	0.0381655	-0.0681299	-0.028555	-0.010765	-0.0700909	-0.115508	-0.192458	-0.22196	-0.240672	-0.246426	-0.276802	-0.2755	-0.264239	-0.238322	-0.20619	-0.172287	-0.12404	-0.0235133	0.0393262	0.141842	0.111434	0.124415	0.215962	0.247498	0.201847	0.152203	0.146632
72	-0.0726411	-0.0738165	-0.0689864	-0.135113	-0.264847	-0.264512	-0.204339	-0.13153	-0.0942369	-0.0207919	0.0703008	0.176492	0.415613	0.621406	0.87587	1	0.811889	0.574561	0.257116	0.0951387	0.0194982	0.0740773	0.043838	-0.0740547	-0.0416524	-0.0120769	-0.0707187	-0.133696	-0.218116	-0.251092	-0.278336	-0.286708	-0.313482	-0.305961	-0.286793	-0.253768	-0.207447	-0.164284	-0.107072	0.000655769	0.0543411	0.164565	0.145982	0.158519	0.255716	0.278407	0.242994	0.199028	0.184628
73	-0.0986875	-0.104497	-0.0931533	-0.139905	-0.248208	-0.232338	-0.168193	-0.0995692	-0.0372795	0.048045	0.143951	0.232238	0.342541	0.405743	0.687417	0.811889	1	0.758881	0.402277	0.225595	0.139407	0.16241	0.1627	0.0252755	0.0115898	0.041342	-0.00475911	-0.0738637	-0.127875	-0.166121	-0.207196	-0.217294	-0.247397	-0.246827	-0.21338	-0.18666	-0.142721	-0.1031	-0.0416065	0.0630818	0.105809	0.204264	0.182324	0.196072	0.276451	0.289615	0.241775	0.21253	0.205757
74	-0.125708	-0.137807	-0.112719	-0.12391	-0.171185	-0.134701	-0.0575134	0.00405257	0.090137	0.185927	0.263193	0.307606	0.361545	0.311194	0.472574	0.574561	0.758881	1	0.698886	0.464574	0.392345	0.398811	0.39424	0.23051	0.181627	0.213672	0.152484	0.0587547	0.0316875	-0.00742598	-0.0626478	-0.0899977	-0.144427	-0.15521	-0.104109	-0.051359	-0.0107278	0.027859	0.0834976	0.204436	0.239278	0.314469	0.312516	0.290181	0.344652	0.321227	0.294428	0.278831	0.269999
75	-0.125435	-0.139669	-0.120264	-0.0939815	-0.0692179	-0.0313443	0.0295936	0.0598732	0.136781	0.233178	0.258102	0.284132	0.2683	0.164564	0.197811	0.257116	0.402277	0.698886	1	0.740687	0.597633	0.638304	0.626653	0.429786	0.33624	0.364176	0.286011	0.183193	0.202782	0.15876	0.0972568	0.06513	0.00901788	-0.0193105	0.028855	0.0817374	0.10074	0.121014	0.15262	0.250514	0.258392	0.292363	0.28777	0.243373	0.260557	0.219699	0.196784	0.198987	0.200249
76	-0.169552	-0.180438	-0.171104	-0.141187	-0.0756875	-0.0262391	0.0284388	0.0595657	0.114702	0.203265	0.171887	0.197215	0.180808	0.0790482	0.0870999	0.0951387	0.225595	0.464574	0.740687	1	0.773541	0.658984	0.668186	0.563429	0.411154	0.385061	0.335029	0.253648	0.304726	0.261492	0.179998	0.150545	0.0960197	0.0487785	0.0887221	0.115089	0.112292	0.135108	0.150315	0.212755	0.202673	0.211812	0.215976	0.205322	0.203644	0.171047	0.138019	0.140123	0.145561
77	-0.155007	-0.158324	-0.127567	-0.0712723	0.0196273	0.0861584	0.149854	0.171075	0.224347	0.282283	0.217542	0.202463	0.184937	0.030663	0.0161442	0.0194982	0.139407	0.392345	0.597633	0.773541	1	0.801133	0.679017	0.647913	0.559726	0.48412	0.388174	0.335393	0.389917	0.402016	0.305544	0.245007	0.18937	0.156899	0.209279	0.238331	0.24048	0.258374	0.251447	0.303794	0.272494	0.268338	0.271681	0.238054	0.214305	0.160849	0.154053	0.171001	0.174135
78	-0.14688	-0.1487	-0.124769	-0.0814102	0.000466957	0.066237	0.116726	0.126224	0.17825	0.250303	0.204731	0.230505	0.243512	0.127397	0.0826848	0.0740773	0.16241	0.398811	0.638304	0.658984	0.801133	1	0.823582	0.656587	0.669755	0.659636	0.498078	0.413183	0.402785	0.354533	0.27666	0.234037	0.155468	0.112162	0.152324	0.20632	0.211044	0.210344	0.197325	0.289714	0.268788	0.278956	0.274004	0.229709	0.215856	0.165911	0.147521	0.154847	0.158643
79	-0.144225	-0.152187	-0.136343	-0.0912341	-0.0271719	0.0336234	0.0743503	0.0744084	0.121473	0.195456	0.159536	0.179955	0.16739	0.0702586	0.0381655	0.043838	0.1627	0.39424	0.626653	0.668186	0.679017	0.823582	1	0.785829	0.654033	0.704598	0.621875	0.4811	0.491736	0.355374	0.269997	0.24262	0.161198	0.0914783	0.136937	0.191195	0.165786	0.164941	0.147702	0.227394	0.215789	0.217294	0.212647	0.18149	0.16784	0.123525	0.0958929	0.097993	0.102638
80	-0.147582	-0.149054	-0.115127	-0.0511275	0.0440671	0.114744	0.150573	0.128148	0.158506	0.208992	0.138975	0.123706	0.0918994	-0.0259542	-0.0681299	-0.0740547	0.0252755	0.23051	0.429786	0.563429	0.647913	0.656587	0.785829	1	0.784237	0.685184	0.64145	0.575362	0.647723	0.536875	0.416944	0.365452	0.280305	0.197065	0.251938	0.282534	0.245168	0.23123	0.175256	0.227142	0.200322	0.173636	0.1607	0.130157	0.0877611	0.0391435	0.0168912	0.0340883	0.0484745
81	-0.126755	-0.11952	-0.0628187	0.00724472	0.107083	0.163804	0.179655	0.139563	0.150184	0.188711	0.125415	0.122738	0.132382	0.0196157	-0.028555	-0.0416524	0.0115898	0.181627	0.33624	0.411154	0.559726	0.669755	0.654033	0.784237	1	0.820521	0.653624	0.650461	0.598548	0.538055	0.457827	0.379724	0.288937	0.238879	0.266056	0.294931	0.266097	0.227102	0.160646	0.23243	0.207525	0.188799	0.177073	0.133455	0.100411	0.0509336	0.0377112	0.0538697	0.0582597
82	-0.1088	-0.108154	-0.0604961	0.000363873	0.068412	0.136533	0.137604	0.0921074	0.10525	0.143619	0.0985908	0.111587	0.132831	0.0496718	-0.010765	-0.0120769	0.041342	0.213672	0.364176	0.385061	0.48412	0.659636	0.704598	0.685184	0.820521	1	0.820133	0.690856	0.573542	0.438617	0.389594	0.346696	0.241493	0.183522	0.214196	0.268419	0.210003	0.174274	0.119674	0.187711	0.167003	0.160015	0.147771	0.102317	0.0810001	0.043988	0.0327096	0.0347905	0.0334136
83	-0.108507	-0.110147	-0.044923	0.0238617	0.0887723	0.166544	0.153405	0.0843115	0.0843163	0.11927	0.0817234	0.0764523	0.0660559	0.0008772	-0.0700909	-0.0707187	-0.00475911	0.152484	0.286011	0.335029	0.388174	0.498078	0.621875	0.64145	0.653624	0.820133	1	0.807015	0.720787	0.512181	0.470143	0.429163	0.287669	0.212246	0.256204	0.327242	0.22929	0.182334	0.0966656	0.160214	0.135317	0.117342	0.107258	0.0756496	0.0433559	0.00506589	-0.00746764	-0.00192483	-0.00379255
84	-0.0933272	-0.0799667	-0.00269856	0.07274	0.172245	0.244458	0.212182	0.116024	0.0932582	0.109887	0.0599728	0.0487343	0.0292627	-0.0526332	-0.115508	-0.133696	-0.0738637	0.0587547	0.183193	0.253648	0.335393	0.413183	0.4811	0.575362	0.650461	0.690856	0.807015	1	0.787277	0.616044	0.578076	0.498261	0.356824	0.299168	0.33346	0.380221	0.284911	0.209503	0.0907209	0.141141	0.11193	0.0827894	0.0763105	0.0536699	0.0165126	-0.0261406	-0.0358509	-0.0168434	-0.0181111
85	-0.116092	-0.106133	-0.0446832	0.0423334	0.173384	0.275261	0.252882	0.172867	0.144826	0.158593	0.0908631	0.0479217	-0.0312573	-0.129915	-0.192458	-0.218116	-0.127875	0.0316875	0.202782	0.304726	0.389917	0.402785	0.491736	0.647723	0.598548	0.573542	0.720787	0.787277	1	0.793759	0.679106	0.631968	0.504213	0.392526	0.438989	0.451829	0.349053	0.294078	0.16518	0.185259	0.13648	0.0865457	0.0722449	0.0459424	-0.019763	-0.0749896	-0.086473	-0.0539093	-0.0440804
86	-0.10752	-0.0730185	-0.0111314	0.0934373	0.27298	0.390613	0.367533	0.278657	0.242049	0.229856	0.12877	0.0546047	-0.024034	-0.167338	-0.22196	-0.251092	-0.166121	-0.00742598	0.15876	0.261492	0.402016	0.354533	0.355374	0.536875	0.538055	0.438617	0.512181	0.616044	0.793759	1	0.854821	0.696234	0.631018	0.596137	0.644623	0.608934	0.495251	0.429088	0.271905	0.256639	0.194139	0.133691	0.107797	0.0676496	-0.0195923	-0.0921483	-0.0732961	-0.0221735	-0.0171017
87	-0.0739619	-0.0361966	0.0348573	0.158457	0.345705	0.46873	0.416014	0.285738	0.239795	0.208697	0.103685	0.0258491	-0.0468227	-0.183874	-0.240672	-0.278336	-0.207196	-0.0626478	0.0972568	0.179998	0.305544	0.27666	0.269997	0.416944	0.457827	0.389594	0.470143	0.578076	0.679106	0.854821	1	0.816026	0.694332	0.698267	0.686004	0.704071	0.539698	0.427541	0.284001	0.236445	0.172477	0.108463	0.0783379	0.0325176	-0.0618705	-0.130988	-0.105749	-0.0525542	-0.0468155
88	-0.0740494	-0.0487591	-0.00084944	0.105592	0.255625	0.357783	0.293593	0.215133	0.157766	0.132902	0.0346932	-0.0225709	-0.103928	-0.206798	-0.246426	-0.286708	-0.217294	-0.0899977	0.06513	0.150545	0.245007	0.234037	0.24262	0.365452	0.379724	0.346696	0.429163	0.498261	0.631968	0.696234	0.816026	1	0.833119	0.689269	0.554846	0.530012	0.365436	0.301232	0.220644	0.150807	0.0864073	0.020943	-0.00693611	-0.0438411	-0.125489	-0.17009	-0.16198	-0.129938	-0.116149
89	-0.0946538	-0.0701757	-0.0191299	0.0851325	0.241734	0.358866	0.273371	0.235194	0.1516	0.103125	-0.00693545	-0.072518	-0.152659	-0.242679	-0.276802	-0.313482	-0.247397	-0.144427	0.00901788	0.0960197	0.18937	0.155468	0.161198	0.280305	0.288937	0.241493	0.287669	0.356824	0.504213	0.631018	0.694332	0.833119	1	0.833538	0.645584	0.49251	0.346361	0.309689	0.231026	0.116336	0.0471727	-0.0260885	-0.0637233	-0.102351	-0.191514	-0.226627	-0.210576	-0.172954	-0.158201
90	-0.0714777	-0.0369841	0.0253107	0.154556	0.34138	0.475478	0.378753	0.311575	0.220752	0.141143	0.0245154	-0.0566169	-0.129341	-0.235142	-0.2755	-0.305961	-0.246827	-0.15521	-0.0193105	0.0487785	0.156899	0.112162	0.0914783	0.197065	0.238879	0.183522	0.212246	0.299168	0.392526	0.596137	0.698267	0.689269	0.833538	1	0.817645	0.634505	0.468468	0.408413	0.296078	0.160013	0.0899941	0.0169076	-0.0194058	-0.0683467	-0.168369	-0.220779	-0.179685	-0.121586	-0.117998
91	-0.0815831	-0.0415037	0.036055	0.176137	0.40242	0.583146	0.51857	0.420525	0.340295	0.258424	0.138574	0.0246864	-0.0655017	-0.214295	-0.264239	-0.286793	-0.21338	-0.104109	0.028855	0.0887221	0.209279	0.152324	0.136937	0.251938	0.266056	0.214196	0.256204	0.33346	0.438989	0.644623	0.686004	0.554846	0.645584	0.817645	1	0.796572	0.633848	0.56899	0.381086	0.26636	0.209158	0.136951	0.104358	0.0413383	-0.0654259	-0.146652	-0.08769	-0.0039865	-0.00561895
92	-0.0315042	0.000401271	0.0667502	0.213875	0.432109	0.615268	0.599068	0.434536	0.395754	0.3482	0.233826	0.104659	0.00412905	-0.17682	-0.238322	-0.253768	-0.18666	-0.051359	0.0817374	0.115089	0.238331	0.20632	0.191195	0.282534	0.294931	0.268419	0.327242	0.380221	0.451829	0.608934	0.704071	0.530012	0.49251	0.634505	0.796572	1	0.78103	0.637438	0.448225	0.369526	0.297149	0.227391	0.194816	0.123674	0.0201314	-0.082588	-0.0214262	0.0697094	0.0620591
93	-0.00847448	0.0211542	0.100687	0.253247	0.506718	0.667908	0.747464	0.584419	0.541097	0.473127	0.344974	0.188423	0.0694913	-0.134817	-0.20619	-0.207447	-0.142721	-0.0107278	0.10074	0.112292	0.24048	0.211044	0.165786	0.245168	0.266097	0.210003	0.22929	0.284911	0.349053	0.495251	0.539698	0.365436	0.346361	0.468468	0.633848	0.78103	1	0.84287	0.6026	0.530567	0.416775	0.337077	0.297674	0.211036	0.0984443	-0.024574	0.0550671	0.168628	0.158794
94	-0.0356718	-0.00689555	0.0597799	0.186713	0.426309	0.57597	0.692424	0.706584	0.660083	0.571799	0.415346	0.238805	0.105757	-0.0918589	-0.172287	-0.164284	-0.1031	0.027859	0.121014	0.135108	0.258374	0.210344	0.164941	0.23123	0.227102	0.174274	0.182334	0.209503	0.294078	0.429088	0.427541	0.301232	0.309689	0.408413	0.56899	0.637438	0.84287	1	0.784771	0.645488	0.503127	0.396102	0.348624	0.249163	0.146634	0.0330319	0.111751	0.225771	0.22534
95	-0.0451475	-0.0259021	-0.00823502	0.0745288	0.2591	0.375523	0.526112	0.660434	0.728874	0.623085	0.494671	0.315087	0.142665	-0.0537974	-0.12404	-0.107072	-0.0416065	0.0834976	0.15262	0.150315	0.251447	0.197325	0.147702	0.175256	0.160646	0.119674	0.0966656	0.0907209	0.16518	0.271905	0.284001	0.220644	0.231026	0.296078	0.381086	0.448225	0.6026	0.784771	1	0.745117	0.603776	0.469614	0.405325	0.29533	0.212776	0.114823	0.174858	0.280822	0.298
96	-0.0426897	-0.0274457	0.00896811	0.0587387	0.208657	0.29131	0.446791	0.537099	0.647118	0.730389	0.65127	0.487244	0.296078	0.0704803	-0.0235133	0.000655769	0.0630818	0.204436	0.250514	0.212755	0.303794	0.289714	0.227394	0.227142	0.23243	0.187711	0.160214	0.141141	0.185259	0.256639	0.236445	0.150807	0.116336	0.160013	0.26636	0.369526	0.530567	0.645488	0.745117	1	0.803076	0.664526	0.553926	0.410183	0.335514	0.218214	0.264846	0.371376	0.387917
97	-0.0718986	-0.0617626	-0.0362219	-0.00776497	0.125876	0.194952	0.352036	0.435617	0.626354	0.696463	0.712586	0.557858	0.367189	0.12244	0.0393262	0.0543411	0.105809	0.239278	0.258392	0.202673	0.272494	0.268788	0.215789	0.200322	0.207525	0.167003	0.135317	0.11193	0.13648	0.194139	0.172477	0.0864073	0.0471727	0.0899941	0.209158	0.297149	0.416775	0.503127	0.603776	0.803076	1	0.81463	0.671073	0.495282	0.446007	0.323737	0.351523	0.452071	0.478597
98	-0.0365328	-0.0316485	-0.00689613	0.0104991	0.0788979	0.132482	0.269873	0.325786	0.509194	0.599372	0.689759	0.64356	0.502881	0.230348	0.141842	0.164565	0.204264	0.314469	0.292363	0.211812	0.268338	0.278956	0.217294	0.173636	0.188799	0.160015	0.117342	0.0827894	0.0865457	0.133691	0.108463	0.020943	-0.0260885	0.0169076	0.136951	0.227391	0.337077	0.396102	0.469614	0.664526	0.81463	1	0.805229	0.605826	0.565972	0.440841	0.449825	0.535855	0.557161
99	-0.0611506	-0.0576216	-0.0356816	-0.019119	0.0563889	0.108989	0.241046	0.29718	0.475441	0.553856	0.682297	0.611044	0.48855	0.213395	0.111434	0.145982	0.182324	0.312516	0.28777	0.215976	0.271681	0.274004	0.212647	0.1607	0.177073	0.147771	0.107258	0.0763105	0.0722449	0.107797	0.0783379	-0.00693611	-0.0637233	-0.0194058	0.104358	0.194816	0.297674	0.348624	0.405325	0.553926	0.671073	0.805229	1	0.832144	0.752302	0.597414	0.605084	0.686839	0.693478
100	-0.052505	-0.0540032	-0.048254	-0.0488779	-0.00031176	0.0397626	0.159488	0.199185	0.353896	0.425333	0.532122	0.488668	0.414227	0.197676	0.124415	0.158519	0.196072	0.290181	0.243373	0.205322	0.238054	0.229709	0.18149	0.130157	0.133455	0.102317	0.0756496	0.0536699	0.0459424	0.0676496	0.0325176	-0.0438411	-0.102351	-0.0683467	0.0413383	0.123674	0.211036	0.249163	0.29533	0.410183	0.495282	0.605826	0.832144	1	0.835755	0.636178	0.6245	0.707955	0.655906
101	-0.0745019	-0.085302	-0.0834495	-0.10057	-0.0839816	-0.053608	0.0679743	0.129306	0.273822	0.359657	0.494159	0.482888	0.472945	0.295792	0.215962	0.255716	0.276451	0.344652	0.260557	0.203644	0.214305	0.215856	0.16784	0.0877611	0.100411	0.0810001	0.0433559	0.0165126	-0.019763	-0.0195923	-0.0618705	-0.125489	-0.191514	-0.168369	-0.0654259	0.0201314	0.0984443	0.146634	0.212776	0.335514	0.446007	0.565972	0.752302	0.835755	1	0.875797	0.805869	0.802039	0.77207
102	-0.100414	-0.114446	-0.115093	-0.147655	-0.155598	-0.13566	-0.0322304	0.0549186	0.171141	0.257238	0.387873	0.41493	0.453821	0.337434	0.247498	0.278407	0.289615	0.321227	0.219699	0.171047	0.160849	0.165911	0.123525	0.0391435	0.0509336	0.043988	0.00506589	-0.0261406	-0.0749896	-0.0921483	-0.130988	-0.17009	-0.226627	-0.220779	-0.146652	-0.082588	-0.024574	0.0330319	0.114823	0.218214	0.323737	0.440841	0.597414	0.636178	0.875797	1	0.86386	0.746347	0.778172
103	-0.0804833	-0.0946217	-0.0852314	-0.0996652	-0.085776	-0.0497897	0.0590765	0.14402	0.247381	0.30076	0.409082	0.372562	0.392983	0.280044	0.201847	0.242994	0.241775	0.294428	0.196784	0.138019	0.154053	0.147521	0.0958929	0.0168912	0.0377112	0.0327096	-0.00746764	-0.0358509	-0.086473	-0.0732961	-0.105749	-0.16198	-0.210576	-0.179685	-0.08769	-0.0214262	0.0550671	0.111751	0.174858	0.264846	0.351523	0.449825	0.605084	0.6245	0.805869	0.86386	1	0.879771	0.806746
104	-0.0730013	-0.0792882	-0.0652341	-0.0580767	-0.0111267	0.0371636	0.160254	0.240686	0.365716	0.403329	0.496726	0.414296	0.383546	0.233056	0.152203	0.199028	0.21253	0.278831	0.198987	0.140123	0.171001	0.154847	0.097993	0.0340883	0.0538697	0.0347905	-0.00192483	-0.0168434	-0.0539093	-0.0221735	-0.0525542	-0.129938	-0.172954	-0.121586	-0.0039865	0.0697094	0.168628	0.225771	0.280822	0.371376	0.452071	0.535855	0.686839	0.707955	0.802039	0.746347	0.879771	1	0.892397
105	-0.0939873	-0.0922572	-0.0774558	-0.0730496	-0.018518	0.0288414	0.152494	0.252129	0.384682	0.428932	0.52619	0.447521	0.409282	0.244349	0.146632	0.184628	0.205757	0.269999	0.200249	0.145561	0.174135	0.158643	0.102638	0.0484745	0.0582597	0.0334136	-0.00379255	-0.0181111	-0.0440804	-0.0171017	-0.0468155	-0.116149	-0.158201	-0.117998	-0.00561895	0.0620591	0.158794	0.22534	0.298	0.387917	0.478597	0.557161	0.693478	0.655906	0.77207	0.778172	0.806746	0.892397	1
106	-0.0916238	-0.0967246	-0.0723646	-0.0704874	-0.0328269	0.012524	0.120241	0.240864	0.331421	0.356584	0.429252	0.345811	0.339114	0.236813	0.150516	0.194618	0.187101	0.234578	0.141879	0.086737	0.118156	0.0933486	0.0369211	-0.008123	0.00679191	-0.0119133	-0.0515898	-0.0668336	-0.105366	-0.0732581	-0.094472	-0.144646	-0.171149	-0.130325	-0.0417225	0.00917659	0.0999861	0.175897	0.248986	0.314822	0.384886	0.447691	0.555205	0.505484	0.639634	0.722694	0.809781	0.788953	0.865079
107	-0.0743122	-0.0768477	-0.0354594	-0.0107916	0.0394097	0.0990306	0.214536	0.323473	0.414564	0.411088	0.470483	0.348181	0.301621	0.194461	0.138528	0.187149	0.183183	0.227632	0.125737	0.050041	0.0986393	0.0705755	0.00975643	-0.0236435	-0.00208024	-0.019414	-0.0583006	-0.0685456	-0.105094	-0.0475729	-0.0686625	-0.148385	-0.165564	-0.0928986	0.0294711	0.0806319	0.196391	0.268161	0.311619	0.374467	0.424691	0.46368	0.557057	0.509418	0.58155	0.587548	0.738559	0.804808	0.792993
108	-0.068746	-0.0654644	-0.0268767	0.0217995	0.122311	0.185868	0.313738	0.404864	0.521815	0.509916	0.563392	0.402094	0.288567	0.128872	0.0495731	0.0961454	0.114685	0.197928	0.152967	0.0797949	0.138495	0.112246	0.0561713	0.0316382	0.0445206	0.0226068	-0.0098376	-0.0180662	-0.0297256	0.0328284	0.0160336	-0.0700537	-0.0917821	-0.0168554	0.108047	0.172566	0.296976	0.360182	0.401152	0.457823	0.510373	0.51811	0.623439	0.538379	0.563419	0.516995	0.655715	0.778355	0.779598
109	-0.0956971	-0.088401	-0.0406936	-0.00734587	0.103945	0.168009	0.289181	0.385081	0.493965	0.47445	0.508618	0.347854	0.239563	0.105572	0.0231681	0.0678774	0.0959358	0.159432	0.120744	0.0700988	0.111232	0.0751442	0.0299042	0.0169995	0.0151044	-0.00608789	-0.0300629	-0.0344124	-0.0383751	0.017625	-0.00113451	-0.0797944	-0.0902124	-0.0229369	0.0942298	0.142874	0.264349	0.331396	0.366125	0.404098	0.446582	0.433567	0.524868	0.440159	0.472716	0.469906	0.579665	0.667404	0.718082
110	-0.0908487	-0.0950625	-0.0538753	-0.0257145	0.0822682	0.14456	0.265806	0.356664	0.460009	0.431862	0.460531	0.302627	0.214345	0.103935	0.0368322	0.0785689	0.0852793	0.154992	0.0985712	0.0461716	0.0970611	0.0536545	0.00370225	0.00228813	0.00964991	-0.0133515	-0.0395165	-0.0404522	-0.0603032	0.000307456	-0.0151198	-0.0918886	-0.101979	-0.0328508	0.0864062	0.127983	0.235467	0.294408	0.327303	0.355583	0.407077	0.400539	0.485352	0.419811	0.454719	0.454864	0.579542	0.643958	0.667321
111	-0.0790585	-0.0774555	-0.046582	0.00813985	0.139677	0.203667	0.324987	0.408096	0.516061	0.457021	0.476165	0.297017	0.172977	0.0424417	-0.00918528	0.02235	0.0359881	0.116928	0.0854263	0.0305169	0.0972523	0.0450056	0.00425323	0.00964861	0.0120668	-0.012805	-0.0313157	-0.032059	-0.0355084	0.0404125	0.0372575	-0.0456244	-0.0512095	0.0279393	0.151043	0.198809	0.300589	0.356	0.39777	0.394504	0.446527	0.412239	0.488325	0.413934	0.419306	0.382737	0.518348	0.619933	0.620595
112	-0.0729005	-0.0590015	-0.0285706	0.039521	0.209889	0.275911	0.395802	0.480251	0.577299	0.482807	0.468876	0.2592	0.100939	-0.0389371	-0.110886	-0.0798118	-0.0581623	0.0431059	0.059109	0.0218833	0.100712	0.0488953	0.00304224	0.0304917	0.0369601	0.0030406	-0.00663558	0.000696419	0.0218556	0.10694	0.109305	0.0427962	0.0473792	0.117916	0.220215	0.257119	0.363329	0.426055	0.466346	0.424852	0.447132	0.370734	0.423801	0.329268	0.304678	0.259463	0.385367	0.491774	0.50682
113	-0.0240471	-0.0113635	0.0278849	0.114445	0.288406	0.339434	0.452578	0.480785	0.595169	0.485184	0.460594	0.230414	0.0298172	-0.128013	-0.205977	-0.187677	-0.150386	-0.0214712	0.0380716	0.020074	0.103084	0.0408175	0.0113362	0.0745947	0.0660706	0.021825	0.0179744	0.0386913	0.0883989	0.174177	0.17967	0.112001	0.107612	0.167622	0.267588	0.308208	0.41147	0.445621	0.479953	0.429464	0.445465	0.342068	0.367967	0.277249	0.205124	0.125794	0.238467	0.365552	0.377321
114	-0.029662	-0.0223634	0.0191094	0.0839776	0.241411	0.290663	0.382179	0.4067	0.497432	0.390188	0.372328	0.167332	-0.0024274	-0.11575	-0.167124	-0.150983	-0.137992	-0.0294607	0.00594596	-0.0207752	0.0473599	0.00555291	-0.0211814	0.0356939	0.044591	0.00745918	-0.000359309	0.0211152	0.055383	0.128027	0.132206	0.0788847	0.0778281	0.134022	0.22316	0.251459	0.349495	0.378161	0.400876	0.355869	0.372032	0.274018	0.291876	0.214597	0.148279	0.0759731	0.188955	0.301738	0.300277
115	-0.0683053	-0.0571663	-0.0150845	0.0314525	0.187253	0.246911	0.340706	0.392253	0.479685	0.395316	0.401737	0.221085	0.0769182	-0.0329186	-0.0785236	-0.053764	-0.0506785	0.0351762	0.038908	-0.00660223	0.0495665	0.0291394	-0.00718096	0.0184209	0.0369797	0.00890682	-0.0125377	0.000423903	0.0161886	0.0869447	0.0839131	0.0286984	0.0276566	0.0897	0.186451	0.212466	0.3164	0.356506	0.384937	0.364108	0.397618	0.332384	0.373575	0.298151	0.260848	0.192315	0.316642	0.423016	0.416925
116	-0.0443244	-0.0357108	0.00889225	0.0616958	0.201918	0.253507	0.350972	0.387633	0.500407	0.430333	0.447873	0.268565	0.105586	-0.0342031	-0.09034	-0.0678666	-0.0444559	0.060435	0.0748839	0.0352963	0.0967013	0.0639491	0.0298009	0.0561135	0.0627192	0.0327989	0.00900226	0.0236134	0.0501743	0.117391	0.108227	0.0468575	0.0332177	0.0860354	0.188974	0.228725	0.330877	0.365115	0.399923	0.394421	0.433866	0.380366	0.417305	0.341197	0.296628	0.210984	0.322756	0.440209	0.436267
117	-0.0622475	-0.0540025	-0.0182061	0.0406892	0.196142	0.261302	0.381056	0.446731	0.57788	0.516258	0.53642	0.344634	0.175631	0.0125418	-0.0637427	-0.0358249	-0.00593683	0.104	0.109915	0.0615093	0.129302	0.0911006	0.047631	0.0601899	0.0659814	0.0321583	0.00412474	0.0136625	0.0360964	0.107201	0.0965845	0.0242613	0.00967541	0.0721247	0.188037	0.240159	0.358091	0.41054	0.462427	0.461377	0.508737	0.455062	0.509368	0.419109	0.394192	0.32091	0.435303	0.556015	0.565199
118	-0.0589149	-0.0448434	-0.0064398	0.073079	0.241699	0.306204	0.439691	0.508749	0.654921	0.590784	0.589027	0.371178	0.158521	-0.0347627	-0.145026	-0.121224	-0.0584542	0.0631088	0.103581	0.0767072	0.161371	0.105705	0.0546824	0.0875247	0.0824454	0.0343275	0.0195974	0.0365558	0.0797998	0.162821	0.150347	0.0728916	0.0601787	0.122398	0.240865	0.290133	0.410945	0.468487	0.518536	0.513374	0.535266	0.458976	0.506373	0.405677	0.357693	0.283705	0.377229	0.50587	0.534611
119	-0.0446999	-0.0349416	0.0120694	0.112532	0.260733	0.311707	0.433195	0.50385	0.621365	0.554845	0.482318	0.256277	0.0500631	-0.10826	-0.231902	-0.20937	-0.12729	-0.019076	0.0516884	0.0552291	0.146835	0.0774727	0.0335306	0.083559	0.0650255	0.0174957	0.0254802	0.0512193	0.111957	0.190187	0.182703	0.127644	0.128226	0.166183	0.253138	0.28821	0.382843	0.445235	0.471612	0.444051	0.408861	0.302108	0.329781	0.232835	0.170522	0.122127	0.200278	0.312633	0.343039
120	-0.0685161	-0.058784	-0.0337422	0.0327891	0.145194	0.186603	0.28371	0.356087	0.476547	0.508718	0.514553	0.336072	0.120123	-0.0113034	-0.121915	-0.108775	-0.034188	0.0390996	0.0691781	0.0661127	0.109133	0.0530356	0.0168213	0.051402	0.0263623	-0.0109984	-0.00553951	0.00854284	0.0597824	0.112053	0.0973548	0.0525125	0.0536264	0.0852964	0.154329	0.185789	0.260593	0.311423	0.351396	0.383646	0.372966	0.295446	0.313759	0.222429	0.194311	0.177287	0.216633	0.300106	0.350617
121	-0.123325	-0.128104	-0.11364	-0.0931956	-0.0219487	0.0259364	0.137693	0.234227	0.372637	0.472134	0.557957	0.501622	0.317671	0.192443	0.0805461	0.0891385	0.160675	0.183309	0.1492	0.112581	0.115565	0.0832811	0.0540187	0.0368932	0.0154382	-0.00335251	-0.00868412	-0.0256536	-0.00144098	0.0122636	-0.0125088	-0.0478802	-0.0631311	-0.0458078	0.0227171	0.0661053	0.132115	0.196618	0.279697	0.358496	0.388287	0.382728	0.395111	0.328492	0.354769	0.354628	0.34162	0.381472	0.42422
122	-0.143354	-0.150682	-0.129806	-0.149055	-0.167435	-0.138051	-0.0571581	0.0256139	0.126505	0.250712	0.354284	0.378189	0.323299	0.300229	0.30526	0.313547	0.401786	0.345932	0.218758	0.161296	0.121277	0.0988716	0.0811799	0.0197962	-0.00333591	-0.0110497	-0.0198009	-0.0519426	-0.0558739	-0.0857243	-0.121923	-0.137213	-0.15756	-0.167071	-0.139009	-0.0965753	-0.0502224	-0.00776309	0.072097	0.173954	0.198089	0.234824	0.243331	0.235281	0.29224	0.330378	0.266917	0.252565	0.287887
123	-0.140671	-0.150269	-0.146417	-0.166269	-0.183217	-0.161517	-0.0898388	-0.0130094	0.069828	0.187493	0.278877	0.32772	0.342647	0.277383	0.285321	0.292082	0.368604	0.330556	0.224773	0.182314	0.144509	0.129204	0.106097	0.029839	0.0159421	0.0145015	-0.00957237	-0.0416278	-0.0694682	-0.0933358	-0.122376	-0.14601	-0.184493	-0.183562	-0.150055	-0.0903347	-0.0621146	-0.0414557	0.0220302	0.121799	0.169531	0.236113	0.282456	0.292669	0.378077	0.406854	0.349968	0.321102	0.339217
124	-0.14189	-0.151594	-0.142272	-0.178491	-0.232302	-0.226651	-0.158081	-0.0854546	-0.0118502	0.0970239	0.201864	0.266842	0.301646	0.278336	0.348847	0.367607	0.43612	0.364072	0.220345	0.162831	0.114554	0.114993	0.0969752	0.00451364	-0.0104552	0.00455214	-0.0232994	-0.0530816	-0.102402	-0.142454	-0.176647	-0.196207	-0.238617	-0.24048	-0.217005	-0.154213	-0.126489	-0.116231	-0.0592973	0.0440466	0.106451	0.182472	0.230054	0.275114	0.370528	0.395502	0.340904	0.307134	0.308056
125	-0.154066	-0.167645	-0.174878	-0.223547	-0.299417	-0.302983	-0.264145	-0.184554	-0.158002	-0.0541161	0.0380092	0.163263	0.258105	0.297071	0.369268	0.380309	0.427408	0.316539	0.161825	0.121137	0.04945	0.0684673	0.0526841	-0.0504958	-0.0605426	-0.0287557	-0.0618738	-0.0985114	-0.162145	-0.217287	-0.245113	-0.236214	-0.267709	-0.27404	-0.279708	-0.245932	-0.242625	-0.224854	-0.171591	-0.0921937	-0.0523307	0.0396729	0.0765691	0.136253	0.24663	0.311857	0.2303	0.159889	0.175791
126	-0.126309	-0.151024	-0.162853	-0.213685	-0.286336	-0.297052	-0.241323	-0.152264	-0.12752	-0.0367453	0.0555136	0.157817	0.254521	0.268581	0.305621	0.334257	0.350081	0.291341	0.159389	0.105313	0.0399225	0.0538388	0.0410099	-0.0652002	-0.074617	-0.0389886	-0.0673364	-0.105723	-0.181316	-0.232058	-0.268651	-0.267231	-0.300153	-0.298241	-0.285157	-0.253693	-0.234423	-0.204545	-0.144807	-0.0710157	-0.0103773	0.0812961	0.136037	0.188229	0.297319	0.350061	0.304537	0.236176	0.243994
127	-0.15098	-0.172096	-0.17565	-0.214159	-0.258795	-0.260463	-0.183201	-0.0850653	-0.0302992	0.0498372	0.154091	0.217278	0.279136	0.266475	0.268227	0.305199	0.314305	0.270021	0.138221	0.0764717	0.0305014	0.0338421	0.00191015	-0.0835746	-0.0840016	-0.0650313	-0.0913354	-0.131395	-0.19505	-0.226616	-0.260588	-0.266026	-0.294763	-0.284608	-0.252755	-0.212023	-0.175175	-0.13502	-0.0550042	0.0118552	0.0917939	0.178206	0.24632	0.280917	0.380982	0.416812	0.402928	0.35555	0.356061
128	-0.166334	-0.185826	-0.175726	-0.201189	-0.230504	-0.224972	-0.16706	-0.0677577	-0.0418165	0.0226275	0.0920917	0.153196	0.225762	0.236488	0.238915	0.27299	0.262468	0.200393	0.0689471	0.0262618	-0.0177102	-0.0252612	-0.0526327	-0.118047	-0.115609	-0.0969238	-0.125842	-0.166418	-0.218128	-0.236954	-0.258165	-0.256839	-0.248545	-0.228719	-0.204635	-0.20055	-0.172095	-0.12871	-0.0560113	-0.00938532	0.0533611	0.121664	0.164834	0.194142	0.275905	0.317016	0.319077	0.275239	0.272854
129	-0.164932	-0.1935	-0.175844	-0.204379	-0.231182	-0.244423	-0.201	-0.123596	-0.103731	-0.0293745	0.0694029	0.13908	0.16589	0.165325	0.172527	0.201176	0.219327	0.182722	0.0964588	0.0412691	-0.0195398	-0.00571823	-0.0146068	-0.103248	-0.101031	-0.0627381	-0.0848147	-0.119952	-0.181798	-0.220916	-0.247249	-0.248178	-0.254535	-0.236864	-0.213605	-0.213782	-0.198706	-0.186254	-0.139376	-0.0861746	-0.0228625	0.0313024	0.102664	0.133009	0.213989	0.264534	0.260863	0.203777	0.195578
130	-0.151545	-0.181466	-0.185428	-0.214764	-0.229441	-0.233843	-0.163205	-0.0802	-0.0258831	0.0360132	0.140363	0.180533	0.206104	0.166788	0.148924	0.18167	0.200919	0.199817	0.124698	0.0735552	0.0243173	0.0392179	0.0250042	-0.0730448	-0.0691258	-0.0310346	-0.0538669	-0.0929615	-0.156916	-0.195083	-0.224134	-0.233821	-0.262206	-0.246558	-0.196321	-0.178284	-0.154754	-0.130481	-0.071507	-0.0170265	0.067068	0.133622	0.234302	0.259293	0.344103	0.376972	0.39718	0.354313	0.338166
131	-0.167345	-0.186577	-0.199569	-0.207537	-0.175551	-0.161366	-0.0782472	0.0180893	0.0803803	0.105969	0.171578	0.166617	0.195325	0.127978	0.0746181	0.106329	0.104614	0.138861	0.0887669	0.0658092	0.034504	0.0254048	-0.00263807	-0.0707728	-0.0677967	-0.0509842	-0.0755277	-0.104941	-0.153167	-0.150535	-0.166602	-0.179561	-0.197646	-0.171409	-0.114578	-0.10609	-0.0819968	-0.0344402	0.0461338	0.0638573	0.149194	0.196232	0.301476	0.313732	0.384134	0.401246	0.448297	0.431306	0.415681
132	-0.177216	-0.196045	-0.19787	-0.207328	-0.156676	-0.149651	-0.0934158	-0.0234103	0.0178335	0.0390668	0.0829476	0.0782844	0.0898542	0.0470991	-0.00759387	0.0139597	0.013129	0.038686	0.0261651	0.021523	-0.0160813	-0.0268627	-0.0476436	-0.0947766	-0.0967845	-0.0799446	-0.0958077	-0.118727	-0.145341	-0.14336	-0.152726	-0.15411	-0.15039	-0.132962	-0.0968758	-0.109578	-0.102873	-0.0731958	-0.0305032	-0.0215012	0.0467064	0.0686787	0.163266	0.169988	0.212528	0.23836	0.286504	0.267998	0.248243
133	-0.14499	-0.164569	-0.179322	-0.200588	-0.157449	-0.166757	-0.118008	-0.0777558	-0.0323976	0.00329992	0.0672726	0.0833243	0.0599413	0.0132913	-0.0184605	-0.00440125	0.0281674	0.0497819	0.0601212	0.0498707	0.00353916	0.0174743	0.00822217	-0.0520913	-0.058312	-0.0273096	-0.0393763	-0.0619926	-0.0839686	-0.110518	-0.131218	-0.133301	-0.147953	-0.143215	-0.103217	-0.111798	-0.113083	-0.107868	-0.0826626	-0.061331	0.0161453	0.0336197	0.120203	0.122402	0.167029	0.203155	0.216436	0.19033	0.177234
134	-0.132491	-0.150007	-0.181468	-0.192735	-0.130297	-0.123125	-0.0499835	0.00304058	0.06665	0.0855754	0.132262	0.117305	0.128452	0.0519866	-0.0185545	0.00373907	-0.00058081	0.069023	0.0805842	0.073647	0.0535948	0.056265	0.0305409	-0.0324273	-0.0271601	-0.00718577	-0.0291428	-0.0534463	-0.0858871	-0.0840698	-0.0958221	-0.104457	-0.128687	-0.116464	-0.0702643	-0.0532436	-0.0523081	-0.0259269	0.0258883	0.038103	0.121951	0.149642	0.260369	0.263733	0.31629	0.324115	0.362537	0.344971	0.326564
135	-0.0943917	-0.119796	-0.125322	-0.149965	-0.14542	-0.14512	-0.0551923	-0.00989384	0.0571365	0.101442	0.198229	0.203173	0.204907	0.155771	0.134687	0.174008	0.183525	0.190675	0.122028	0.0514841	0.0210619	0.0452916	0.0156624	-0.077467	-0.0612327	-0.0326376	-0.0583097	-0.0893418	-0.141578	-0.152071	-0.1719	-0.202772	-0.235922	-0.209039	-0.1399	-0.10091	-0.0626622	-0.0464993	-0.0167466	0.0505951	0.128275	0.191125	0.297671	0.314055	0.378428	0.369644	0.402125	0.400106	0.367808
136	-0.0347423	-0.0685751	-0.0932345	-0.098127	-0.138828	-0.143012	-0.0609342	0.0270627	0.0645303	0.113225	0.197413	0.2247	0.280062	0.241479	0.207289	0.25195	0.224062	0.233904	0.124195	0.0463874	0.0271038	0.042324	0.0179996	-0.0849368	-0.0525862	-0.0212313	-0.0548881	-0.083958	-0.170888	-0.183581	-0.191756	-0.193658	-0.229401	-0.199678	-0.170277	-0.119919	-0.0809733	-0.0340568	0.0295919	0.0847306	0.139381	0.218771	0.304474	0.323262	0.406933	0.413775	0.45103	0.43182	0.395989
137	0.0219203	0.00561567	-0.0322745	-0.000470683	0.052389	0.0483402	0.139946	0.185547	0.245394	0.265375	0.295173	0.221361	0.204573	0.0661129	-0.0238927	0.0173403	-0.00590987	0.131291	0.162532	0.118673	0.137545	0.114733	0.0841107	0.0345331	0.035734	0.0336672	-0.00334899	-0.00294326	-0.0435538	-0.00229131	-0.00302346	-0.0300296	-0.0797501	-0.0392281	0.0120375	0.0769399	0.118289	0.153169	0.195796	0.222945	0.265307	0.300942	0.391046	0.370586	0.412328	0.383864	0.456392	0.464373	0.445622
138	0.0514372	0.0259939	-0.00939089	-0.00857033	0.0102896	0.0150547	0.0950117	0.147629	0.210438	0.21953	0.275791	0.201535	0.150243	0.0589456	-0.0418232	0.00438728	-0.0318252	0.07693	0.0893709	0.0406667	0.0531228	0.0510351	0.0341608	-0.00373349	-0.00740252	0.00703002	-0.0045877	-0.0117722	-0.0359639	-0.0258583	-0.0251007	-0.025641	-0.0679596	-0.0554846	-0.0199137	0.0404015	0.0823434	0.109078	0.165088	0.198661	0.234305	0.269758	0.349555	0.326603	0.35471	0.323274	0.385272	0.390699	0.382353
139	-0.0205867	-0.038333	-0.110047	-0.101132	-0.0449093	-0.0324427	0.00119275	0.0500931	0.0688819	0.0537895	0.025074	0.0123498	0.0751919	0.0103437	-0.116344	-0.102276	-0.151992	-0.0434016	0.0253098	0.068071	0.0708345	0.0526092	0.0333442	0.0082255	0.00813966	0.0134074	0.0026358	-0.00121544	-0.0262641	-0.00103442	0.0190148	0.0526175	0.0401035	0.0353201	0.0133006	0.0151889	-0.0153409	0.0244006	0.083871	0.0508783	0.0749106	0.102896	0.170455	0.16871	0.20063	0.207583	0.246632	0.219809	0.211444
140	-0.0679338	-0.0856922	-0.13337	-0.111015	-0.0150334	0.00262985	0.0295314	0.0498071	0.0658519	0.0568715	0.0107467	-0.00255259	0.0413373	-0.0362709	-0.17349	-0.175021	-0.209311	-0.0710127	0.0416714	0.0958839	0.0949537	0.0856935	0.0619024	0.040193	0.0366676	0.0464788	0.0307455	0.027056	0.013759	0.0424328	0.0581141	0.0869268	0.0735955	0.0631974	0.0480258	0.0484731	0.0166261	0.0338602	0.0694027	0.0363034	0.0572283	0.0663727	0.138055	0.129789	0.142084	0.145816	0.194657	0.180541	0.168299
141	-0.113476	-0.134115	-0.150194	-0.129252	-0.0257417	0.00615945	0.0605671	0.102588	0.12865	0.120815	0.116552	0.0731408	0.0906672	0.0368439	-0.0585445	-0.0454284	-0.0847387	0.00652606	0.0340702	0.0337122	0.0347661	0.0264796	-0.00912802	-0.0427106	-0.0288634	-0.0158359	-0.0390976	-0.0477819	-0.0749607	-0.0412759	-0.0316652	-0.0343598	-0.0385593	-0.0105266	0.0171391	0.0291142	0.0436986	0.060812	0.0875481	0.0831449	0.125383	0.126898	0.210661	0.193908	0.211102	0.206429	0.292891	0.308811	0.287543
142	-0.129465	-0.141625	-0.152255	-0.128349	-0.0449356	-0.0146577	0.0451556	0.123997	0.152668	0.13394	0.13198	0.083722	0.119085	0.0942505	0.014041	0.0302164	-0.0268613	0.0125916	-0.0168737	-0.0258729	-0.018826	-0.0427503	-0.0909019	-0.107276	-0.0800281	-0.0812633	-0.115641	-0.115068	-0.14875	-0.104122	-0.0920262	-0.0920465	-0.082351	-0.0387911	-0.0139592	-0.0141228	0.0115758	0.0548457	0.111088	0.0917035	0.138145	0.143085	0.219522	0.212292	0.238004	0.240098	0.333858	0.36104	0.34198
143	-0.156863	-0.15976	-0.143809	-0.131145	-0.060632	-0.0408907	0.00730853	0.094576	0.117447	0.10115	0.0900841	0.0434333	0.0571735	0.045716	-0.00707958	0.0215179	0.00044642	-0.00211493	-0.0517588	-0.039731	-0.0459574	-0.0876099	-0.122318	-0.120842	-0.101754	-0.115794	-0.140553	-0.134839	-0.156243	-0.115933	-0.119676	-0.12593	-0.0908784	-0.051399	-0.0230267	-0.057891	-0.0295555	0.0220217	0.0593537	0.0375524	0.0757712	0.0638072	0.12859	0.121973	0.143965	0.157524	0.229545	0.248914	0.238971
144	-0.152749	-0.148361	-0.121492	-0.105966	-0.0905189	-0.0884505	-0.0487741	0.0352229	0.0476181	0.0514664	0.0496716	0.0183886	0.0441363	0.0689466	0.0398173	0.0752038	0.0770393	0.0160023	-0.0706275	-0.0508611	-0.0710705	-0.109444	-0.140054	-0.136184	-0.127861	-0.142701	-0.155343	-0.151477	-0.169946	-0.141303	-0.156272	-0.138493	-0.103978	-0.0806823	-0.085283	-0.121105	-0.0936021	-0.0350286	0.00850257	0.00298151	0.0139125	0.00693255	0.0424576	0.0468648	0.073133	0.103685	0.137874	0.151105	0.15193
145	-0.178252	-0.169061	-0.130354	-0.13557	-0.111454	-0.110117	-0.100536	-0.0267372	-0.0257196	-0.00953089	-0.0139902	-0.00618937	0.00652086	0.0604994	0.0563731	0.0754323	0.0934587	-0.00328338	-0.10458	-0.0736167	-0.124147	-0.151691	-0.177288	-0.161732	-0.154411	-0.173144	-0.171807	-0.164205	-0.1724	-0.156016	-0.173167	-0.15269	-0.0965559	-0.0828254	-0.102956	-0.159055	-0.140928	-0.088658	-0.0540578	-0.0622396	-0.0581698	-0.0839126	-0.0711963	-0.0666616	-0.0358737	0.0171886	0.0087963	0.00873343	0.0251296
146	-0.166695	-0.161912	-0.142099	-0.145142	-0.147328	-0.145144	-0.155012	-0.120298	-0.108733	-0.0776257	-0.099573	-0.0676986	-0.0444396	-0.0275854	-0.0321163	-0.0490361	0.00652627	-0.0263349	-0.0296588	0.062886	0.0169099	-0.0259513	-0.0468055	-0.0250174	-0.0564437	-0.0853297	-0.0765037	-0.0799121	-0.0553319	-0.0508613	-0.0773227	-0.0447125	-0.0160897	-0.0447541	-0.102993	-0.138409	-0.169909	-0.150253	-0.112163	-0.135939	-0.140644	-0.155239	-0.132131	-0.108023	-0.0831396	-0.0183211	-0.0682226	-0.0958467	-0.0657568
147	-0.193071	-0.195913	-0.192612	-0.206344	-0.204431	-0.181203	-0.179012	-0.120514	-0.122131	-0.071023	-0.0735217	-0.0134264	0.0526645	0.0712834	0.110056	0.102882	0.141097	0.0652587	-0.0119529	0.0461084	-0.0187413	-0.055762	-0.0483294	-0.0560494	-0.0885814	-0.0922385	-0.0917213	-0.110102	-0.102056	-0.118194	-0.132733	-0.0946955	-0.0789717	-0.104918	-0.142779	-0.167114	-0.185856	-0.15195	-0.10665	-0.102461	-0.0944604	-0.0834874	-0.099687	-0.0803571	-0.0299335	0.0334981	-0.0168195	-0.0445624	-0.0173302
148	-0.188074	-0.204407	-0.219624	-0.242509	-0.258348	-0.245253	-0.243089	-0.180961	-0.168328	-0.0806245	-0.063323	0.0218708	0.0833843	0.0963075	0.177414	0.169411	0.234283	0.160413	0.101954	0.168335	0.071887	0.0283509	0.0564386	0.0109504	-0.0509974	-0.0493064	-0.0522774	-0.0761247	-0.0679434	-0.121432	-0.149974	-0.105402	-0.105745	-0.144567	-0.18664	-0.191248	-0.222675	-0.1994	-0.144489	-0.126949	-0.105402	-0.0766687	-0.0754065	-0.0406247	0.0287823	0.0999756	0.0220096	-0.0343513	-0.0020027
149	-0.165276	-0.185723	-0.20346	-0.228498	-0.264244	-0.254294	-0.243262	-0.186101	-0.156111	-0.0465842	-0.0132036	0.0741009	0.131449	0.136579	0.235795	0.233435	0.330149	0.268828	0.216751	0.281104	0.176197	0.12089	0.145416	0.0768722	-0.0059334	-0.00831447	-0.0146035	-0.0529147	-0.0407892	-0.105559	-0.15208	-0.123469	-0.142555	-0.180735	-0.205053	-0.186774	-0.201372	-0.190966	-0.14224	-0.0997694	-0.0836814	-0.0302633	-0.0191689	0.0293134	0.10474	0.169554	0.0847171	0.0182632	0.0455333
150	-0.168887	-0.189312	-0.200702	-0.222428	-0.261998	-0.246824	-0.232658	-0.19134	-0.15291	-0.0348626	0.000225905	0.099477	0.150271	0.147157	0.237209	0.231609	0.354988	0.318359	0.274093	0.352535	0.241996	0.185559	0.219391	0.143449	0.0473967	0.0442947	0.0386093	0.00362181	0.0211501	-0.0644979	-0.12032	-0.104088	-0.120855	-0.163485	-0.175296	-0.163668	-0.182869	-0.17747	-0.138772	-0.0838174	-0.0650104	-0.00952337	-0.00490381	0.0523461	0.114096	0.161729	0.068492	0.00941583	0.0312051
151	-0.119653	-0.157797	-0.183827	-0.191554	-0.197286	-0.194857	-0.183251	-0.182952	-0.147977	-0.033867	0.00228645	0.0979861	0.112447	0.0477678	0.0863712	0.0293986	0.162645	0.166445	0.217803	0.285543	0.222153	0.187294	0.219997	0.164126	0.0858964	0.073004	0.067994	0.0561301	0.0690219	-0.0170931	-0.0459857	-0.0334949	-0.0598129	-0.103714	-0.108993	-0.0894876	-0.135192	-0.163523	-0.137323	-0.0938533	-0.0534419	-0.00278248	0.0131764	0.070128	0.12744	0.16461	0.0810758	0.0104711	0.0273951
152	-0.123793	-0.153821	-0.177014	-0.181272	-0.220562	-0.214715	-0.225476	-0.2305	-0.204519	-0.118919	-0.0700612	0.0398076	0.101145	0.113773	0.132409	0.0839744	0.1366	0.115801	0.125213	0.158239	0.107228	0.098817	0.117207	0.073235	0.0486976	0.0520331	0.0368183	0.0184077	0.00574434	-0.0708798	-0.0769402	-0.0563742	-0.0678639	-0.100196	-0.130537	-0.128008	-0.197376	-0.223117	-0.186234	-0.14108	-0.0987694	-0.0454339	-0.0537036	-0.0072342	0.0477622	0.0965132	0.015319	-0.0546996	-0.0483074
153	-0.0600433	-0.0713836	-0.0906375	-0.0926896	-0.155071	-0.160282	-0.17931	-0.198806	-0.188557	-0.134096	-0.105379	-0.0186172	0.0257539	0.0560211	0.0676607	0.0454786	0.075966	0.0560695	0.0452229	0.0501275	0.0264371	0.0213735	0.0328704	0.025534	0.0279193	0.0250874	0.0121889	0.00934466	-0.00482743	-0.042254	-0.0399427	-0.0363693	-0.0368746	-0.0506583	-0.0953692	-0.099489	-0.167949	-0.195647	-0.176794	-0.139671	-0.125596	-0.0956423	-0.12073	-0.0970609	-0.0684069	-0.0275923	-0.0854613	-0.132022	-0.129266
154	-0.0215037	-0.0303542	-0.0626365	-0.0990632	-0.132444	-0.112562	-0.0908833	-0.0460078	-0.0255081	0.00606609	0.0146182	0.0657026	0.178071	0.181798	0.141013	0.144558	0.0851873	0.122441	0.0838113	0.0802543	0.0941235	0.111503	0.0514852	0.0118099	0.0338534	0.0132815	-0.0244671	-0.0348941	-0.0590849	-0.0565131	-0.074186	-0.0536916	-0.0675304	-0.0770797	-0.0839637	-0.0907349	-0.0854798	-0.0535573	-0.025154	0.0156961	0.0277324	0.100216	0.142997	0.163617	0.208902	0.211386	0.200508	0.165467	0.14596
155	-0.0754562	-0.0752799	-0.0830317	-0.101106	-0.161021	-0.18707	-0.196246	-0.204871	-0.192797	-0.143718	-0.106879	-0.0436952	0.0265453	0.0620552	0.140755	0.137738	0.144362	0.0820198	0.00482368	0.0060384	-0.0488102	-0.0664193	-0.0548722	-0.0788758	-0.102338	-0.114236	-0.109359	-0.117427	-0.115867	-0.129158	-0.142066	-0.118823	-0.107583	-0.134165	-0.165743	-0.175135	-0.189361	-0.199408	-0.182959	-0.148752	-0.127097	-0.0908538	-0.0846707	-0.0381011	-0.0180433	-0.000788512	-0.0341366	-0.0510907	-0.0685151
156	-0.0319035	-0.0431475	-0.0080578	0.00653238	-0.0190439	-0.042183	-0.060645	-0.096826	-0.0916745	-0.0725887	-0.0404619	-0.0305363	-0.0426814	-0.0284775	0.0237421	0.0211124	0.0311269	0.00885654	-0.0505435	-0.0727999	-0.0979494	-0.126347	-0.106838	-0.0885057	-0.0919314	-0.107838	-0.101999	-0.0799347	-0.0746919	-0.0759808	-0.077819	-0.065713	-0.0595599	-0.0661229	-0.0863992	-0.0867219	-0.066826	-0.0925748	-0.0929307	-0.0725278	-0.0567207	-0.0660784	-0.0803669	-0.0698071	-0.0798282	-0.0852172	-0.0791115	-0.0614841	-0.0772729
157	-0.0178161	-0.0127316	0.0284349	0.0644037	0.0715595	0.0394223	-0.0157481	-0.083906	-0.091015	-0.0992495	-0.101349	-0.109173	-0.193964	-0.191759	-0.158719	-0.183995	-0.14281	-0.144247	-0.113181	-0.0933187	-0.107962	-0.148032	-0.122353	-0.0549841	-0.0692133	-0.0957207	-0.0658365	-0.0250299	0.0158319	0.0223731	0.0421224	0.06534	0.0779948	0.0615167	0.0236057	0.00422371	-0.0180947	-0.0635095	-0.0790161	-0.103574	-0.108217	-0.169237	-0.198355	-0.19848	-0.243207	-0.242401	-0.253484	-0.225155	-0.22683
158	-0.00719195	0.00425744	0.0329342	0.0546132	0.0497115	-0.00167828	-0.0739554	-0.13464	-0.169397	-0.185325	-0.204209	-0.190088	-0.251598	-0.228979	-0.18311	-0.210925	-0.186382	-0.214671	-0.175715	-0.139885	-0.166192	-0.19781	-0.169337	-0.100268	-0.115093	-0.140772	-0.107117	-0.069065	-0.025003	-0.0265529	0.000532417	0.0399589	0.0601064	0.040754	-0.0121783	-0.0438763	-0.0804765	-0.126426	-0.138637	-0.185624	-0.205767	-0.262055	-0.307025	-0.307678	-0.346578	-0.324173	-0.341269	-0.320844	-0.316457
159	0.0202173	0.0290149	0.0619077	0.0900764	0.0914415	0.0395547	-0.0261142	-0.0796063	-0.104941	-0.131681	-0.154034	-0.166147	-0.236692	-0.230649	-0.202674	-0.215588	-0.181825	-0.199732	-0.145764	-0.104723	-0.12961	-0.159256	-0.13065	-0.0480818	-0.0623126	-0.0978663	-0.058014	-0.0241862	0.0247781	0.0218751	0.0522732	0.0943358	0.104585	0.0787849	0.0286413	0.00252875	-0.0363172	-0.0786262	-0.0922977	-0.147453	-0.15955	-0.225151	-0.261702	-0.263634	-0.312829	-0.299602	-0.327199	-0.298712	-0.277026
160	-0.00401781	-0.00367229	0.0352172	0.0623779	0.059542	0.0306295	-0.0120685	-0.0503509	-0.0546926	-0.0756245	-0.0781331	-0.108234	-0.177368	-0.184648	-0.164993	-0.173769	-0.129456	-0.138877	-0.0894833	-0.0641354	-0.0756336	-0.0982183	-0.0773945	-0.0241964	-0.0383461	-0.0638204	-0.0312393	-0.0212964	0.0212181	0.0233551	0.0449781	0.0662958	0.0742374	0.0668679	0.0467095	0.0223192	-0.0053614	-0.0343541	-0.0452057	-0.0921666	-0.0929019	-0.151072	-0.168367	-0.166351	-0.210557	-0.210075	-0.236755	-0.211914	-0.18778
161	0.0421854	0.0366497	0.0724801	0.111321	0.112212	0.0672804	0.0132543	-0.043674	-0.0607753	-0.0693717	-0.0788423	-0.112325	-0.205711	-0.23423	-0.225167	-0.245941	-0.192344	-0.163722	-0.0705479	-0.0347004	-0.0428855	-0.0745533	-0.0497523	0.0145179	-0.0199554	-0.0592217	-0.0206693	0.00545093	0.059303	0.0540554	0.0714134	0.0913208	0.095323	0.0810787	0.0625637	0.0412319	0.0130712	-0.0393973	-0.0820151	-0.102453	-0.121791	-0.171325	-0.177056	-0.173149	-0.228279	-0.231698	-0.250417	-0.221908	-0.203114
162	0.0547565	0.0665368	0.110245	0.151036	0.153007	0.12121	0.0618961	0.0206799	-0.0427224	-0.0866636	-0.128998	-0.178491	-0.24125	-0.24463	-0.232893	-0.251686	-0.221945	-0.213905	-0.14217	-0.118653	-0.0973957	-0.123028	-0.109523	-0.0227125	-0.0434632	-0.0875255	-0.0365882	0.000967161	0.0525861	0.0725106	0.0871287	0.108761	0.136517	0.132137	0.114072	0.071449	0.0557951	0.0151259	-0.0496559	-0.0955214	-0.151336	-0.205438	-0.218658	-0.220111	-0.286455	-0.300024	-0.290241	-0.246699	-0.239658
163	0.0510719	0.0669722	0.0981476	0.141452	0.168509	0.146159	0.0840333	0.0487424	0.00164837	-0.0577571	-0.113339	-0.171274	-0.246673	-0.266356	-0.289674	-0.307765	-0.276546	-0.246971	-0.159039	-0.118815	-0.0937077	-0.13504	-0.117717	-0.00724792	-0.0294761	-0.085968	-0.034752	0.0116485	0.0727786	0.102746	0.11934	0.135266	0.165723	0.168439	0.15655	0.0986572	0.0744649	0.0440473	-0.00126599	-0.0689068	-0.106934	-0.182104	-0.196005	-0.212989	-0.27884	-0.288419	-0.275193	-0.230868	-0.215502
164	0.0388353	0.04288	0.0517409	0.095218	0.153243	0.129507	0.0777036	0.0446736	0.00783411	-0.0343544	-0.0793994	-0.132389	-0.209829	-0.252749	-0.297394	-0.310102	-0.289868	-0.225292	-0.122727	-0.0820111	-0.0688925	-0.107986	-0.0914725	-0.000187587	-0.0385465	-0.0875819	-0.0405182	0.00226908	0.0535073	0.0810073	0.0986301	0.120167	0.140934	0.14285	0.128606	0.0878176	0.0629049	0.0297796	-0.00352622	-0.0652002	-0.0887738	-0.157229	-0.145159	-0.159465	-0.207768	-0.20986	-0.201131	-0.173927	-0.158017
165	0.0270394	0.0402683	0.0483151	0.0924876	0.172121	0.167344	0.12768	0.104096	0.0721901	0.0207672	-0.031867	-0.103739	-0.189535	-0.245694	-0.291028	-0.301308	-0.271505	-0.213373	-0.103939	-0.0604676	-0.0367227	-0.0824256	-0.0661617	0.0277359	-0.0129581	-0.067264	-0.0289379	0.0150758	0.0709207	0.102609	0.125734	0.131119	0.153884	0.163299	0.168145	0.130751	0.117405	0.0901828	0.0501674	-0.0170409	-0.0312268	-0.113873	-0.100835	-0.127123	-0.182132	-0.195887	-0.179506	-0.132912	-0.116778
166	0.0395193	0.0439639	0.0510736	0.10467	0.170162	0.162476	0.126753	0.104767	0.0771406	0.0181718	-0.0336239	-0.0924931	-0.173412	-0.236948	-0.288291	-0.304305	-0.267846	-0.20913	-0.104107	-0.0553055	-0.0274208	-0.0718357	-0.0495277	0.0438337	0.00870412	-0.0385963	-0.00396803	0.0385038	0.0902584	0.113442	0.134195	0.129296	0.150926	0.161924	0.166625	0.133893	0.122358	0.0931988	0.0512588	-0.0193542	-0.029148	-0.109185	-0.10685	-0.126822	-0.186661	-0.201086	-0.191877	-0.142921	-0.124303
167	0.0200942	0.0288085	0.0423561	0.0972129	0.18725	0.173317	0.129142	0.0851734	0.0629642	0.0169675	-0.043277	-0.0985095	-0.188071	-0.210589	-0.249918	-0.269654	-0.246659	-0.214637	-0.0930715	-0.0638355	-0.0533371	-0.0656596	-0.0497153	0.0162022	-0.00953973	-0.0216379	0.0163993	0.0496061	0.0888028	0.0975993	0.133583	0.142643	0.156875	0.160596	0.124329	0.131235	0.11369	0.084881	0.0393806	-0.0291792	-0.0608509	-0.14773	-0.141046	-0.159641	-0.229179	-0.24277	-0.24153	-0.192797	-0.175429
168	0.045153	0.0544196	0.070322	0.132191	0.235766	0.220394	0.178342	0.128581	0.117873	0.0570424	-0.00146817	-0.0765294	-0.206795	-0.253595	-0.307342	-0.324549	-0.283945	-0.233201	-0.113687	-0.0814624	-0.0521727	-0.080393	-0.0706202	0.0150873	0.00975345	-0.0294196	0.00363067	0.0586245	0.106088	0.13199	0.170924	0.159996	0.182438	0.205928	0.181014	0.17304	0.168006	0.13739	0.0912418	0.026981	0.00456868	-0.0959782	-0.0945788	-0.123007	-0.204113	-0.237346	-0.218435	-0.150309	-0.140532
169	0.0309429	0.0321959	0.0318185	0.0828902	0.179213	0.173728	0.150753	0.110722	0.127091	0.0782182	0.0310778	-0.0312532	-0.148548	-0.184454	-0.238028	-0.257594	-0.224611	-0.173135	-0.0830463	-0.0509653	-0.0245258	-0.0533387	-0.0473284	0.0186138	0.0177123	-0.00829098	0.0173435	0.0598563	0.0963139	0.108946	0.143425	0.132415	0.148964	0.164168	0.130333	0.146559	0.14825	0.127228	0.0997878	0.0492442	0.0430099	-0.0464249	-0.0387328	-0.0628671	-0.128113	-0.15854	-0.148746	-0.0940211	-0.0873968
170	0.0214141	0.0220837	0.0278598	0.0884285	0.184167	0.18985	0.17293	0.124445	0.162839	0.111603	0.0841709	0.00441659	-0.126072	-0.210246	-0.266719	-0.26925	-0.208243	-0.140101	-0.0620783	-0.0298759	0.0108804	-0.0315612	-0.0236681	0.0623287	0.0673226	0.0196233	0.0448533	0.0929034	0.134833	0.163292	0.17894	0.152067	0.159067	0.181746	0.189489	0.187243	0.185866	0.158583	0.138181	0.098349	0.110292	0.030461	0.0432548	0.0158407	-0.0490014	-0.0987145	-0.0870695	-0.0196204	-0.0157321
171	0.0562091	0.0667792	0.0816957	0.143125	0.215833	0.221364	0.201709	0.158906	0.179616	0.10971	0.0765491	-0.0106578	-0.111244	-0.212662	-0.23984	-0.235818	-0.176882	-0.129178	-0.0715167	-0.0323826	0.0164271	-0.0376512	-0.0349322	0.0687385	0.0743514	0.00751207	0.0262618	0.0741252	0.125294	0.180001	0.188452	0.146812	0.15459	0.194944	0.229527	0.204992	0.213852	0.197871	0.178138	0.119072	0.120209	0.0459269	0.0431678	0.00686616	-0.0614271	-0.117347	-0.0813048	-3.78843e-06	-0.00234506
172	0.0680123	0.087248	0.126781	0.182292	0.245594	0.249677	0.217325	0.1597	0.157072	0.0765202	0.0306311	-0.0550742	-0.162625	-0.22048	-0.243188	-0.250536	-0.196533	-0.179268	-0.117749	-0.0777208	-0.0186882	-0.064026	-0.0583339	0.0610653	0.0665273	0.00268728	0.0280536	0.0787355	0.141449	0.193083	0.201389	0.157257	0.174678	0.213847	0.246848	0.215989	0.228566	0.203566	0.15272	0.0957559	0.0671546	-0.0139229	-0.0351201	-0.0711565	-0.161227	-0.21668	-0.17722	-0.0856226	-0.0899952
173	0.0796956	0.0990791	0.139584	0.197523	0.270244	0.276349	0.248188	0.197574	0.191519	0.107027	0.0467745	-0.0515541	-0.176491	-0.223427	-0.247067	-0.251655	-0.197888	-0.182103	-0.118201	-0.0826443	-0.0226506	-0.063117	-0.0625768	0.0565441	0.0662869	0.00560809	0.0283039	0.0779642	0.141696	0.205557	0.224831	0.183326	0.20208	0.241561	0.268556	0.242277	0.249931	0.236932	0.186374	0.125269	0.0830213	-0.00160048	-0.0319093	-0.0736606	-0.1689	-0.226202	-0.17772	-0.0796915	-0.0795929
174	0.0806806	0.0986561	0.138254	0.193563	0.255808	0.255311	0.219432	0.174778	0.148706	0.070332	0.0133498	-0.0741832	-0.187564	-0.230623	-0.255931	-0.258518	-0.209213	-0.189235	-0.122353	-0.0922448	-0.035118	-0.0742634	-0.0683776	0.0515415	0.0537275	-0.00579214	0.0228197	0.0726594	0.134157	0.194318	0.208837	0.169882	0.189785	0.222605	0.248008	0.214689	0.222119	0.199749	0.136754	0.0828064	0.0376206	-0.0468323	-0.0785109	-0.120222	-0.211557	-0.254493	-0.207549	-0.121777	-0.118196
175	0.038643	0.0590214	0.0884897	0.127562	0.183486	0.183462	0.135317	0.0986196	0.0560625	-0.0242489	-0.0865894	-0.138432	-0.205208	-0.198042	-0.214615	-0.245133	-0.230117	-0.238581	-0.178053	-0.121243	-0.0828811	-0.106161	-0.101689	0.0192321	0.0315715	-0.0337203	-0.00503307	0.0529966	0.111598	0.155379	0.168316	0.144907	0.172443	0.191351	0.194148	0.151995	0.145827	0.125316	0.0642406	-0.0014066	-0.0353459	-0.120462	-0.163343	-0.188903	-0.271495	-0.29669	-0.269707	-0.201529	-0.198106
176	0.0249105	0.0454663	0.0859335	0.118386	0.180763	0.174429	0.146754	0.0853963	0.0620401	-0.0124882	-0.0710118	-0.115903	-0.194597	-0.170777	-0.18638	-0.220839	-0.208824	-0.23135	-0.168512	-0.12162	-0.0852427	-0.0872551	-0.0985223	0.00861512	0.0345598	-0.0219942	-0.00195779	0.051487	0.108287	0.140535	0.157156	0.134562	0.154462	0.176466	0.176917	0.148212	0.149624	0.130731	0.0676544	0.0131693	-0.0260666	-0.103043	-0.152636	-0.182502	-0.267463	-0.30055	-0.286177	-0.209181	-0.209931
177	0.0708555	0.090231	0.135583	0.164438	0.200694	0.207151	0.168377	0.125448	0.0881083	0.00397222	-0.0618179	-0.111975	-0.185201	-0.15609	-0.172106	-0.180572	-0.163133	-0.190317	-0.16237	-0.131797	-0.0843255	-0.105352	-0.11068	0.00398603	0.0260828	-0.0376305	-0.0105122	0.045243	0.0964755	0.132438	0.153932	0.1296	0.163557	0.19479	0.196096	0.154233	0.165276	0.15371	0.0900648	0.0379375	-0.0190266	-0.094039	-0.152034	-0.178304	-0.261574	-0.292734	-0.272791	-0.195494	-0.19173
178	0.101331	0.1196	0.153567	0.187717	0.217839	0.216104	0.157399	0.116244	0.0563749	-0.0262287	-0.101989	-0.157333	-0.231366	-0.212619	-0.21852	-0.228826	-0.198505	-0.213768	-0.171	-0.136693	-0.0955814	-0.12666	-0.111843	0.00735604	0.0063806	-0.0540638	-0.0100514	0.0495215	0.109277	0.150521	0.170884	0.161081	0.199004	0.217184	0.205959	0.157229	0.152577	0.132135	0.0568208	-0.00636474	-0.0703454	-0.156023	-0.212652	-0.23572	-0.326596	-0.349273	-0.322464	-0.254394	-0.247093
179	0.0813783	0.102984	0.135452	0.163706	0.194467	0.195279	0.129484	0.0806208	0.0161587	-0.0605011	-0.135432	-0.170378	-0.23548	-0.203845	-0.201906	-0.22683	-0.206677	-0.237921	-0.186893	-0.143472	-0.112026	-0.12179	-0.108015	0.00423105	0.00504831	-0.0368335	0.00530787	0.0582014	0.11608	0.154421	0.172902	0.175667	0.208964	0.212727	0.192609	0.144352	0.129521	0.103724	0.0275483	-0.0361133	-0.104597	-0.188138	-0.249052	-0.265734	-0.357877	-0.3777	-0.360405	-0.298817	-0.29363
180	0.0790799	0.0997207	0.130567	0.156911	0.189973	0.201933	0.147378	0.105564	0.0514824	-0.0199609	-0.0965595	-0.132209	-0.197384	-0.165537	-0.172519	-0.188159	-0.169858	-0.201458	-0.160571	-0.123097	-0.0890657	-0.0986047	-0.0889106	0.0121657	0.0206632	-0.0177442	0.0151941	0.0605462	0.114351	0.144386	0.167664	0.166084	0.195603	0.204324	0.191962	0.146791	0.144075	0.12645	0.0633716	0.00783216	-0.0579887	-0.13681	-0.199672	-0.222176	-0.306636	-0.328392	-0.316216	-0.253245	-0.244899
181	0.0679752	0.0954118	0.12434	0.140102	0.173995	0.179445	0.130438	0.090325	0.0248209	-0.0441931	-0.113143	-0.136822	-0.176269	-0.151332	-0.15623	-0.164787	-0.144036	-0.170152	-0.137107	-0.104796	-0.0801726	-0.0899833	-0.079128	0.00525548	0.0131989	-0.0156117	0.0278299	0.0694422	0.103187	0.123994	0.148111	0.149789	0.174907	0.184635	0.166718	0.127902	0.120252	0.099547	0.0292332	-0.0322553	-0.0973878	-0.165726	-0.206361	-0.21946	-0.287326	-0.302587	-0.2911	-0.238185	-0.235091
182	0.0787092	0.106934	0.142243	0.156804	0.171832	0.170835	0.110701	0.0560501	-0.01826	-0.0799457	-0.148821	-0.16188	-0.196345	-0.15418	-0.140495	-0.153066	-0.136712	-0.174445	-0.142765	-0.118355	-0.099582	-0.105553	-0.0910888	-0.0121199	-0.00878615	-0.0322182	0.0223406	0.0648714	0.0985853	0.1287	0.150098	0.154523	0.180101	0.184594	0.155624	0.111408	0.101449	0.0744113	-0.0133553	-0.0593633	-0.138311	-0.198587	-0.244377	-0.251824	-0.326485	-0.338567	-0.324159	-0.275522	-0.276204
183	0.0828438	0.107904	0.142066	0.157742	0.159978	0.1607	0.101816	0.0479042	-0.0327498	-0.0870284	-0.158073	-0.16358	-0.191821	-0.143042	-0.119152	-0.134607	-0.120648	-0.16348	-0.137131	-0.11288	-0.0926391	-0.103457	-0.092459	-0.0187762	-0.0188741	-0.0386359	0.0155932	0.0569462	0.0896257	0.130898	0.154162	0.153004	0.173731	0.182309	0.150301	0.112916	0.101257	0.064886	-0.0169652	-0.057559	-0.143063	-0.192994	-0.241102	-0.247643	-0.319179	-0.32913	-0.315844	-0.275608	-0.275265
184	0.08203	0.106266	0.151507	0.169795	0.15628	0.162569	0.0938064	0.0401334	-0.0408503	-0.091945	-0.163931	-0.177668	-0.207076	-0.143239	-0.108442	-0.12891	-0.112787	-0.164456	-0.151496	-0.126333	-0.106483	-0.118796	-0.108858	-0.0277074	-0.028779	-0.0549359	-0.00143711	0.0373772	0.0753358	0.133128	0.152461	0.155177	0.176414	0.181144	0.155845	0.1144	0.101033	0.0677332	-0.018735	-0.0488914	-0.14843	-0.194765	-0.256011	-0.259992	-0.339322	-0.356573	-0.339393	-0.295945	-0.295858
185	0.0951785	0.124483	0.178185	0.194356	0.182397	0.183577	0.106082	0.0435844	-0.0401801	-0.101966	-0.172079	-0.192664	-0.226556	-0.163004	-0.113505	-0.136133	-0.11897	-0.190971	-0.175349	-0.160186	-0.144319	-0.149968	-0.135211	-0.0540678	-0.0533595	-0.067473	-0.00509485	0.0350136	0.0738351	0.121937	0.143479	0.155725	0.17706	0.173413	0.146532	0.104881	0.102445	0.0790029	-0.0203482	-0.0554198	-0.166704	-0.214283	-0.284587	-0.291941	-0.383107	-0.407336	-0.386213	-0.326114	-0.323571
186	0.0913523	0.115387	0.164337	0.167356	0.113864	0.0972159	0.0164847	-0.0491166	-0.129278	-0.173082	-0.214861	-0.209673	-0.235126	-0.143353	-0.0647312	-0.093704	-0.0825557	-0.185953	-0.195298	-0.183414	-0.188874	-0.185712	-0.161766	-0.0912917	-0.0983868	-0.0973642	-0.024593	0.00845333	0.0401942	0.0563056	0.0794886	0.11522	0.131414	0.108622	0.0665039	0.0280889	0.00994196	-0.0207709	-0.100323	-0.126983	-0.227585	-0.254307	-0.334082	-0.326618	-0.400236	-0.409351	-0.405323	-0.371036	-0.36787
187	0.054852	0.0629707	0.0891011	0.113283	0.063566	0.0374412	-0.065287	-0.132932	-0.208676	-0.244887	-0.304072	-0.282275	-0.294982	-0.200684	-0.148463	-0.209105	-0.209754	-0.272976	-0.220903	-0.15887	-0.170752	-0.170679	-0.13903	-0.06215	-0.0783881	-0.076059	-0.013284	0.0142843	0.0642876	0.055067	0.0780261	0.138574	0.159103	0.113886	0.0359136	-0.00692846	-0.0664913	-0.103257	-0.152284	-0.210073	-0.275015	-0.327758	-0.409694	-0.398209	-0.461595	-0.439539	-0.459914	-0.451432	-0.445604
188	0.0100111	0.00822656	0.0205701	0.0222016	-0.0513162	-0.0811564	-0.17946	-0.231584	-0.287977	-0.292039	-0.300198	-0.259889	-0.284699	-0.158042	-0.0783075	-0.136344	-0.135925	-0.233227	-0.218133	-0.172292	-0.222471	-0.214755	-0.163499	-0.109745	-0.134689	-0.11638	-0.0566414	-0.0464545	-0.000230163	-0.0380085	-0.0195676	0.0576962	0.0733957	0.0124325	-0.0726335	-0.107855	-0.17363	-0.215223	-0.227429	-0.265245	-0.300598	-0.340244	-0.415036	-0.390171	-0.416475	-0.368117	-0.427028	-0.44796	-0.427713
189	-0.0203868	-0.0309551	-0.0325875	-0.0444599	-0.126672	-0.150865	-0.216808	-0.257727	-0.272315	-0.25225	-0.22131	-0.177769	-0.212417	-0.107729	-0.0343094	-0.0794828	-0.0646287	-0.151497	-0.158993	-0.1241	-0.179016	-0.167793	-0.119746	-0.0944296	-0.119487	-0.0909584	-0.0403884	-0.0432835	-0.0119986	-0.0667493	-0.0552093	0.0194348	0.0153807	-0.0478433	-0.12227	-0.137329	-0.197969	-0.238268	-0.215992	-0.231474	-0.231479	-0.250012	-0.293813	-0.249872	-0.255918	-0.210536	-0.297386	-0.332711	-0.308976
190	-0.0789106	-0.0990838	-0.120633	-0.151654	-0.244621	-0.274529	-0.319394	-0.318355	-0.311583	-0.256643	-0.179541	-0.101066	-0.122794	-0.0185546	0.0479566	0.00838747	0.0241939	-0.0578755	-0.0863113	-0.0619171	-0.142856	-0.129297	-0.0745316	-0.0882349	-0.133185	-0.0965835	-0.0496842	-0.065368	-0.0443531	-0.142998	-0.143183	-0.0498148	-0.0661818	-0.145617	-0.223543	-0.229186	-0.295084	-0.317435	-0.261649	-0.248499	-0.215129	-0.203219	-0.21488	-0.158455	-0.109196	-0.0366793	-0.161037	-0.239914	-0.20432
191	-0.0573019	-0.0717333	-0.0884656	-0.102887	-0.161983	-0.181226	-0.205922	-0.2297	-0.191768	-0.148064	-0.0785018	-0.0504075	-0.120475	-0.0914515	-0.0313398	-0.0671681	-0.0193845	-0.0623505	-0.0615801	-0.038294	-0.0918094	-0.0883944	-0.0421526	-0.045345	-0.0857958	-0.0508236	-0.00439045	-0.0160495	0.0154911	-0.0574957	-0.051227	0.0207219	-0.00505188	-0.0707424	-0.128593	-0.118157	-0.179584	-0.20257	-0.147462	-0.152448	-0.113438	-0.106622	-0.103916	-0.0537962	-0.0280449	0.0089966	-0.114684	-0.169972	-0.14002
192	-0.0714117	-0.0899036	-0.111577	-0.140644	-0.216145	-0.229112	-0.238382	-0.267602	-0.21476	-0.153845	-0.0646504	-0.00536685	-0.0349019	-0.00956699	0.056891	0.0280763	0.0847816	0.0328728	0.00419919	0.0158295	-0.043725	-0.0222766	0.0243453	-0.0135604	-0.0469605	-0.0052706	0.0337626	0.0145582	0.0180902	-0.0763662	-0.0792361	-0.0206982	-0.069157	-0.130829	-0.17293	-0.141694	-0.202055	-0.232976	-0.188736	-0.16638	-0.107941	-0.0732229	-0.0283096	0.0561964	0.0915669	0.0992855	-0.0282737	-0.0873548	-0.0782953
193	-0.0595157	-0.0800326	-0.101764	-0.137755	-0.215139	-0.231385	-0.238104	-0.273886	-0.226386	-0.164856	-0.0875005	-0.0172464	-0.0231369	0.00753439	0.0563606	0.0308743	0.0938723	0.0441101	0.0120498	0.0301885	-0.037066	-0.0202954	0.0309302	-0.015445	-0.0525052	-0.0138655	0.0220938	0.00607031	0.00583986	-0.0895676	-0.0992538	-0.0591157	-0.0953696	-0.148705	-0.182682	-0.158159	-0.210414	-0.244865	-0.215561	-0.192031	-0.141492	-0.0924523	-0.0574787	0.0307379	0.062712	0.0711143	-0.0455591	-0.104757	-0.0994527
194	-0.0770745	-0.0972277	-0.113709	-0.148984	-0.228322	-0.238276	-0.249946	-0.286275	-0.239335	-0.174691	-0.0965657	-0.0238128	-0.0194568	0.021884	0.0837991	0.0599649	0.125904	0.060143	0.0170523	0.0295761	-0.0416203	-0.019193	0.0157434	-0.0324051	-0.0583364	-0.0196188	0.0138246	-0.00764834	-0.0161423	-0.103901	-0.109833	-0.0621409	-0.103759	-0.163167	-0.195634	-0.176196	-0.220577	-0.245826	-0.219613	-0.188159	-0.145273	-0.0964934	-0.0684408	0.0136933	0.0506051	0.0685392	-0.0328628	-0.0909622	-0.0902044
195	-0.0891875	-0.104896	-0.101575	-0.117205	-0.162724	-0.171393	-0.172219	-0.217288	-0.157459	-0.0957343	-0.0307135	0.029928	0.0335328	0.0246731	0.0605352	0.0343388	0.10535	0.103193	0.0897507	0.0987222	0.0535969	0.0600757	0.0740261	0.0310992	0.0192726	0.0302422	0.036055	0.027964	0.0161847	-0.0401277	-0.0520722	-0.0326314	-0.0827968	-0.123137	-0.142222	-0.10933	-0.137261	-0.168899	-0.155522	-0.117748	-0.0693736	-0.0332505	0.00630806	0.0762149	0.0967535	0.0967846	0.0257852	-0.0116642	-0.0206609
196	-0.0111773	-0.0178753	-0.00163493	0.00699386	-0.048373	-0.0818565	-0.104727	-0.169036	-0.144384	-0.103206	-0.0464298	-0.0131593	-0.0846654	-0.0954341	-0.0509881	-0.0809987	0.00823716	0.019556	0.0479917	0.0472224	0.0130658	0.00294168	0.0370777	0.0296503	-0.000152762	0.00310315	0.0290136	0.0406402	0.0540497	0.00401048	0.00279925	0.0256021	-0.0108365	-0.0514286	-0.0877356	-0.0593634	-0.0827199	-0.134039	-0.144156	-0.120754	-0.108106	-0.104653	-0.0935961	-0.0447922	-0.0589664	-0.0613007	-0.114961	-0.128216	-0.130579
197	0.020992	0.0128332	0.0304922	0.0260406	-0.0546639	-0.0847376	-0.111982	-0.193552	-0.170057	-0.136437	-0.0829082	-0.0489092	-0.13285	-0.119003	-0.058334	-0.0846368	0.0119831	-0.014919	0.00223642	0.00322994	-0.0378323	-0.0402679	0.00870973	0.00886889	-0.0232252	-0.0048325	0.046303	0.0535964	0.0729884	0.0148504	0.0122281	0.0381062	0.000852079	-0.041345	-0.0754422	-0.0494377	-0.0850683	-0.146342	-0.169725	-0.147402	-0.149992	-0.140459	-0.141513	-0.0742386	-0.110872	-0.129931	-0.202273	-0.203165	-0.202423
198	-0.00352998	-0.0145862	0.0140133	0.00529372	-0.0443017	-0.0558446	-0.0607833	-0.139368	-0.0952573	-0.075678	-0.0293391	-0.00216544	-0.0595511	-0.0605734	-0.0259403	-0.0471559	0.0246805	0.0210118	0.0280628	0.0344928	0.0141551	0.0263783	0.0474265	0.0435665	0.0477566	0.056108	0.0752951	0.080941	0.08085	0.0436053	0.028341	0.0289304	-0.0118201	-0.0383096	-0.0389458	-0.0144176	-0.0333499	-0.082666	-0.107311	-0.0798319	-0.0604429	-0.0458095	-0.0351193	0.0211984	-0.012018	-0.0496626	-0.103475	-0.0919732	-0.105481
199	0.00412226	0.0030102	0.0395201	0.0505022	0.0427923	0.0374911	0.0371461	-0.0512399	-0.0011572	0.00518335	0.0255475	0.0140462	-0.0594816	-0.11522	-0.104482	-0.127021	-0.0450897	0.0125737	0.0471874	0.058936	0.0695187	0.0537	0.056988	0.0744551	0.0726588	0.0610452	0.0697372	0.0907144	0.103831	0.095724	0.0821538	0.0648412	0.0258618	0.0201011	0.0306166	0.0578231	0.0588151	0.0109792	-0.0284126	-0.0142336	-0.000710413	-0.00507307	0.0119579	0.0493491	0.00642524	-0.0439517	-0.0708078	-0.0396409	-0.0623375
200	0.044488	0.053083	0.0964274	0.125628	0.1267	0.110672	0.0861621	-0.00233368	0.0214731	0.00468048	0.0146617	-0.0294048	-0.167042	-0.199032	-0.175615	-0.209651	-0.122256	-0.0795457	-0.0191646	-0.00974157	0.0120535	-0.0219231	-0.0063397	0.0516477	0.0367825	0.0157574	0.0473076	0.0876197	0.131647	0.130729	0.1327	0.118583	0.104939	0.103101	0.0960057	0.108706	0.104615	0.0522944	0.00452442	-0.0101735	-0.0231677	-0.0670833	-0.0798931	-0.0623491	-0.137589	-0.187588	-0.207309	-0.1586	-0.164104
201	0.0137198	0.0239591	0.0548148	0.0648127	0.0274291	0.0229181	-0.0119992	-0.0711607	-0.0552557	-0.0728655	-0.0505334	-0.0517027	-0.148114	-0.0987421	-0.00465374	-0.0314196	0.0458591	-0.0384334	-0.0835925	-0.0884113	-0.0891066	-0.0928064	-0.0666765	-0.0185468	-0.0175553	-0.0213858	0.00624012	0.0292718	0.0612312	0.0599946	0.06143	0.0484567	0.0392214	0.0398652	0.0368865	0.0407648	0.0221015	-0.0323358	-0.0629895	-0.0682594	-0.0785327	-0.10137	-0.151759	-0.128907	-0.188309	-0.216278	-0.245491	-0.199594	-0.206547
202	0.0273669	0.034127	0.0550039	0.070181	0.0477754	0.0535877	0.0453741	-0.00592396	0.0397755	0.00720423	0.00503761	-0.00209707	-0.0483615	-0.050097	-0.0177157	-0.0374427	0.021504	-0.00608824	-0.0282282	-0.00598895	0.0144551	0.00453394	0.00843534	0.0513193	0.0571175	0.035121	0.0383205	0.0537825	0.0879692	0.096727	0.0757983	0.0451138	0.0307118	0.0391499	0.0682456	0.0710221	0.0725726	0.0463021	0.0204707	0.00794341	0.017439	0.0157455	-0.00599567	0.0114114	-0.0409162	-0.0863937	-0.100975	-0.048408	-0.066215
203	0.0522276	0.0640959	0.101718	0.140578	0.180254	0.18982	0.178375	0.110519	0.148561	0.0856908	0.0618996	-0.0102429	-0.113147	-0.166572	-0.168743	-0.187534	-0.124355	-0.085814	-0.0451737	-0.0168775	0.0332959	0.00354692	-0.00224493	0.0814028	0.0902058	0.049325	0.0560038	0.0990104	0.144208	0.175975	0.163349	0.117923	0.105967	0.133069	0.175612	0.172802	0.193588	0.167969	0.120494	0.0795206	0.0761236	0.0277307	0.018709	0.0028015	-0.0787669	-0.144483	-0.124583	-0.0435035	-0.0566449
204	0.0878819	0.101245	0.148073	0.200395	0.227353	0.227295	0.183102	0.107331	0.110275	0.0345594	0.000108073	-0.0795902	-0.210114	-0.217359	-0.201376	-0.22698	-0.162212	-0.162384	-0.114373	-0.0894053	-0.0489967	-0.0803774	-0.0592474	0.0476158	0.0476951	0.0180245	0.0525718	0.102595	0.157233	0.188023	0.192962	0.161838	0.16199	0.186652	0.203363	0.191996	0.199203	0.161766	0.103884	0.0490013	0.010117	-0.0649711	-0.117262	-0.144411	-0.245363	-0.293424	-0.26285	-0.178652	-0.181806
205	0.069966	0.0820538	0.123895	0.164727	0.18775	0.197801	0.172942	0.100697	0.121239	0.0500142	0.018568	-0.0435134	-0.149341	-0.155063	-0.142821	-0.161065	-0.10154	-0.108208	-0.0752181	-0.0527441	-0.0162925	-0.0299875	-0.0156256	0.0684835	0.075154	0.0553648	0.0760006	0.108075	0.15837	0.184664	0.182165	0.144158	0.143155	0.164537	0.190546	0.183912	0.196656	0.163397	0.120198	0.0756371	0.0467306	-0.00902223	-0.0625471	-0.0834542	-0.177605	-0.231713	-0.209354	-0.125866	-0.134034
206	0.0689794	0.082099	0.119922	0.160524	0.20982	0.227658	0.225686	0.163034	0.199208	0.120102	0.0863135	0.00442811	-0.0941048	-0.143015	-0.156268	-0.163739	-0.114003	-0.077341	-0.0353221	-0.0163871	0.0410047	0.018838	0.0159984	0.0989859	0.114375	0.0815465	0.0843232	0.117015	0.161136	0.20394	0.19577	0.141679	0.138427	0.170389	0.219666	0.214966	0.242234	0.223666	0.18695	0.138004	0.129315	0.0746916	0.0490105	0.0210432	-0.0650717	-0.134065	-0.0932718	-0.00211056	-0.0216429
207	0.093291	0.105816	0.147173	0.197442	0.261339	0.268474	0.247096	0.177285	0.191965	0.105964	0.0549261	-0.0410683	-0.16858	-0.214186	-0.229596	-0.244904	-0.186947	-0.151122	-0.0791616	-0.0544753	0.00329237	-0.0229829	-0.0178763	0.0816821	0.0928842	0.0580442	0.0754049	0.114329	0.171533	0.216882	0.220771	0.173802	0.17715	0.212737	0.252071	0.236605	0.258478	0.23476	0.18166	0.121985	0.0931792	0.0111939	-0.0249088	-0.0674208	-0.169013	-0.229922	-0.181598	-0.085759	-0.0966177
208	0.0984128	0.109858	0.157533	0.208338	0.255409	0.268025	0.235956	0.163178	0.164782	0.0800324	0.027217	-0.0538546	-0.17582	-0.196187	-0.209372	-0.226699	-0.1754	-0.163392	-0.0946622	-0.0708661	-0.0219518	-0.0363633	-0.0290147	0.0664714	0.0812193	0.0604816	0.0768716	0.109194	0.165241	0.204769	0.217282	0.184977	0.18768	0.215886	0.238226	0.229682	0.245764	0.219717	0.16683	0.10748	0.0647575	-0.0105576	-0.0686188	-0.117231	-0.220252	-0.273635	-0.230886	-0.139346	-0.144397
209	0.108402	0.122103	0.170032	0.21561	0.237882	0.243958	0.195152	0.115621	0.099446	0.0218721	-0.027118	-0.0940044	-0.219514	-0.211843	-0.205128	-0.224948	-0.168668	-0.180502	-0.11773	-0.10429	-0.0692514	-0.0763853	-0.0612969	0.0273459	0.030977	0.0206461	0.0529542	0.0875875	0.142536	0.172164	0.188501	0.166706	0.170794	0.191099	0.197486	0.186607	0.202492	0.172805	0.109452	0.0534486	-0.00663922	-0.0800923	-0.15901	-0.2033	-0.306675	-0.347337	-0.313515	-0.228136	-0.226256
210	0.0889693	0.101742	0.139065	0.166982	0.164631	0.165333	0.110579	0.040852	0.0182117	-0.0393826	-0.0895278	-0.114268	-0.20475	-0.164904	-0.144	-0.164498	-0.121089	-0.16507	-0.117086	-0.102093	-0.0908124	-0.082162	-0.0611331	-0.00827818	-0.00451991	0.00422919	0.0306879	0.0571268	0.0965525	0.114349	0.128988	0.124009	0.130431	0.135974	0.118714	0.111943	0.121627	0.0940155	0.0387093	-0.00434251	-0.0708953	-0.123694	-0.218977	-0.249218	-0.33828	-0.358875	-0.342623	-0.279727	-0.273358
211	0.0822803	0.105204	0.148459	0.158617	0.151513	0.152824	0.0974235	0.037339	0.0164363	-0.0348252	-0.0844228	-0.113061	-0.185414	-0.142491	-0.118685	-0.131038	-0.116558	-0.154248	-0.122936	-0.10834	-0.1061	-0.102794	-0.0929257	-0.0437542	-0.0411539	-0.0334603	-0.00526016	0.0204672	0.0561462	0.0982623	0.117324	0.116424	0.125762	0.131551	0.109665	0.0994914	0.104306	0.0932173	0.050173	0.00911149	-0.0596657	-0.10177	-0.192054	-0.221929	-0.308807	-0.333915	-0.30691	-0.247477	-0.245419
212	0.0272883	0.0545212	0.101178	0.112276	0.137639	0.13565	0.0953568	0.0376228	0.00957054	-0.029187	-0.0777022	-0.0863734	-0.134656	-0.0900178	-0.0545189	-0.0697815	-0.0658189	-0.113569	-0.0881956	-0.0797451	-0.0908516	-0.0833564	-0.0856635	-0.059462	-0.0525505	-0.0441531	-0.0224171	-0.00454041	0.0233882	0.0657709	0.0790785	0.0740328	0.0828353	0.0867142	0.0737928	0.0683873	0.096051	0.102563	0.0428029	0.0146117	-0.0542095	-0.0969086	-0.169357	-0.191171	-0.266701	-0.295169	-0.267229	-0.209145	-0.215225
213	0.0847637	0.104886	0.155851	0.171338	0.164258	0.166348	0.132921	0.0515987	0.026229	-0.0293949	-0.0783172	-0.118938	-0.198713	-0.158833	-0.142713	-0.153528	-0.128783	-0.160085	-0.123345	-0.102449	-0.0846538	-0.0913998	-0.0870708	-0.0130134	-0.0136931	-0.0193207	0.0211251	0.0477533	0.0946039	0.131754	0.142239	0.126948	0.131094	0.141564	0.148205	0.127008	0.13705	0.115718	0.0377218	0.00932441	-0.0716392	-0.118954	-0.185051	-0.199771	-0.291362	-0.329852	-0.312716	-0.243568	-0.242871
214	0.0952138	0.111733	0.152039	0.186121	0.193137	0.187451	0.147892	0.0658961	0.0302251	-0.0307119	-0.0778733	-0.120326	-0.226778	-0.199599	-0.162572	-0.183961	-0.124933	-0.169469	-0.119055	-0.10395	-0.084886	-0.0898481	-0.0721682	0.00142003	-0.00820334	-0.013095	0.0367962	0.0657406	0.120557	0.155006	0.163365	0.146	0.152378	0.165009	0.16914	0.145865	0.152863	0.124441	0.030091	-0.00137517	-0.0849118	-0.143065	-0.205624	-0.223092	-0.324042	-0.366838	-0.350332	-0.271838	-0.267652
215	0.0965179	0.117119	0.165315	0.188026	0.176428	0.170524	0.119091	0.0448519	-0.0011605	-0.0605442	-0.113051	-0.14464	-0.223014	-0.183556	-0.123082	-0.144744	-0.09941	-0.167548	-0.150623	-0.133342	-0.116934	-0.119519	-0.101404	-0.0234878	-0.0301625	-0.03218	0.0269517	0.0489138	0.0997349	0.142934	0.15384	0.150657	0.159106	0.156671	0.147944	0.121198	0.12293	0.0992701	0.0063695	-0.0212609	-0.112552	-0.162163	-0.230513	-0.238364	-0.336369	-0.375526	-0.357117	-0.285079	-0.284727
216	0.0740231	0.100517	0.153116	0.16015	0.143791	0.149871	0.104597	0.0436175	0.0061636	-0.0586715	-0.117668	-0.143395	-0.175287	-0.122524	-0.0560338	-0.0691435	-0.0566323	-0.142451	-0.169275	-0.147839	-0.121131	-0.123337	-0.127848	-0.0498928	-0.038904	-0.0431001	0.00530312	0.0140603	0.0584753	0.120846	0.136386	0.139463	0.151815	0.144999	0.137819	0.102826	0.104533	0.0993791	0.0330127	0.00405261	-0.085257	-0.115223	-0.189838	-0.200787	-0.290974	-0.328709	-0.295846	-0.229149	-0.237031
217	0.0351744	0.0546177	0.0840521	0.0961528	0.0797053	0.0790645	0.0200657	-0.0334126	-0.0598061	-0.109215	-0.151505	-0.171321	-0.203332	-0.140303	-0.0750862	-0.111891	-0.112133	-0.194379	-0.203813	-0.157426	-0.14622	-0.15026	-0.138233	-0.0585275	-0.0554872	-0.0541367	-0.00861024	-0.00568771	0.0492772	0.08887	0.104794	0.127756	0.140687	0.119706	0.0897499	0.056081	0.0277833	0.0190361	-0.00957442	-0.0465003	-0.0976811	-0.147089	-0.222111	-0.233084	-0.303514	-0.315165	-0.315117	-0.274657	-0.267472
218	0.0440515	0.0530431	0.076737	0.067399	-0.0011404	-0.0201502	-0.106916	-0.161748	-0.220518	-0.24389	-0.279648	-0.251702	-0.250644	-0.140902	-0.0549854	-0.110041	-0.11494	-0.209079	-0.203304	-0.15965	-0.184858	-0.175213	-0.135488	-0.0831785	-0.104119	-0.0816712	-0.0283314	-0.0250686	0.0188074	0.0155856	0.0340888	0.0938787	0.106826	0.056121	-0.0155514	-0.0482551	-0.101966	-0.126828	-0.156645	-0.192524	-0.256658	-0.291162	-0.373732	-0.354535	-0.402806	-0.374162	-0.412562	-0.416254	-0.402674
219	-0.0147131	-0.0222039	-0.0230721	-0.0465279	-0.142185	-0.172208	-0.255275	-0.292008	-0.324498	-0.300874	-0.275136	-0.213334	-0.228767	-0.0994985	-0.00586611	-0.0674402	-0.0621328	-0.162674	-0.161487	-0.120324	-0.185139	-0.165274	-0.106334	-0.0847103	-0.123517	-0.0880639	-0.02897	-0.0366598	0.00126039	-0.0701931	-0.061896	0.0254952	0.023123	-0.0561534	-0.143361	-0.167996	-0.242019	-0.27509	-0.260336	-0.277672	-0.294297	-0.307145	-0.35737	-0.309883	-0.311201	-0.2532	-0.349116	-0.399446	-0.372097
220	-0.0226603	-0.0402331	-0.0559601	-0.0877739	-0.213431	-0.263191	-0.354863	-0.369621	-0.41787	-0.373693	-0.332937	-0.231538	-0.217909	-0.0460879	0.0448581	-0.0173626	-0.0302657	-0.158974	-0.177315	-0.144798	-0.236648	-0.213245	-0.147293	-0.139607	-0.17864	-0.144618	-0.0862652	-0.0898718	-0.067267	-0.166771	-0.158385	-0.0537324	-0.0474276	-0.136329	-0.240817	-0.271009	-0.348363	-0.386307	-0.360202	-0.368606	-0.375868	-0.370432	-0.42724	-0.373639	-0.340768	-0.239411	-0.353652	-0.437239	-0.402392
221	-0.05904	-0.0833674	-0.108577	-0.148323	-0.279495	-0.330171	-0.386667	-0.372033	-0.396561	-0.328009	-0.245697	-0.138181	-0.114607	0.0464049	0.127246	0.0859809	0.0675544	-0.0658661	-0.122655	-0.111377	-0.209606	-0.180736	-0.114273	-0.133982	-0.17444	-0.139191	-0.0928996	-0.113318	-0.0983011	-0.222902	-0.224292	-0.1257	-0.12761	-0.211086	-0.300332	-0.317625	-0.3778	-0.407347	-0.352375	-0.331937	-0.302735	-0.276416	-0.309071	-0.250416	-0.186063	-0.084949	-0.213286	-0.305291	-0.26804
222	-0.0726844	-0.0988003	-0.127842	-0.160284	-0.265212	-0.309414	-0.361539	-0.344412	-0.358464	-0.292342	-0.213255	-0.117205	-0.100767	0.0362194	0.0914934	0.056556	0.0380117	-0.0602131	-0.0997294	-0.0857575	-0.178758	-0.159516	-0.0994332	-0.122172	-0.161635	-0.140367	-0.0971927	-0.113099	-0.0998419	-0.210444	-0.213617	-0.124722	-0.126833	-0.198148	-0.276803	-0.30129	-0.354498	-0.381801	-0.327783	-0.305517	-0.265277	-0.240311	-0.248605	-0.19583	-0.12728	-0.0355725	-0.152066	-0.239238	-0.206217
223	-0.0605947	-0.087554	-0.115292	-0.142914	-0.253308	-0.300977	-0.363784	-0.341095	-0.36949	-0.306171	-0.235445	-0.133972	-0.121684	0.0207964	0.0596145	0.0207997	-0.00303179	-0.09394	-0.110508	-0.0988782	-0.190267	-0.165646	-0.104375	-0.128786	-0.16814	-0.14068	-0.105891	-0.119732	-0.107655	-0.217223	-0.219882	-0.126366	-0.117083	-0.19216	-0.278693	-0.310103	-0.362552	-0.388641	-0.337934	-0.319774	-0.289795	-0.272525	-0.289978	-0.23977	-0.17923	-0.0833892	-0.193257	-0.280514	-0.245714
224	-0.0397014	-0.0611901	-0.0803526	-0.109633	-0.22846	-0.279511	-0.364004	-0.358508	-0.410323	-0.355949	-0.304709	-0.196374	-0.190804	-0.0258	0.0344763	-0.0202855	-0.0376779	-0.15232	-0.160846	-0.144538	-0.235563	-0.210236	-0.147653	-0.15168	-0.191849	-0.166543	-0.120046	-0.121405	-0.0987935	-0.200985	-0.198618	-0.0994693	-0.0787994	-0.159729	-0.25974	-0.300971	-0.363896	-0.402331	-0.370087	-0.36423	-0.363528	-0.360199	-0.399882	-0.35286	-0.309133	-0.204507	-0.308303	-0.392134	-0.357142
225	-0.02925	-0.0434519	-0.0612717	-0.0747502	-0.168923	-0.215995	-0.313472	-0.325267	-0.386846	-0.350986	-0.326108	-0.23906	-0.237111	-0.0805313	-0.0186275	-0.0800313	-0.0944394	-0.193836	-0.186971	-0.159074	-0.238346	-0.223695	-0.168823	-0.153869	-0.185907	-0.172761	-0.12615	-0.113886	-0.0896245	-0.163426	-0.153454	-0.0613696	-0.0343317	-0.102442	-0.202164	-0.253952	-0.314838	-0.363367	-0.345251	-0.361475	-0.374451	-0.383899	-0.424357	-0.385029	-0.35957	-0.261743	-0.346862	-0.415184	-0.384624
226	-0.0128706	-0.0243528	-0.0375869	-0.0386901	-0.0983996	-0.138331	-0.232664	-0.248007	-0.314114	-0.297637	-0.291846	-0.242756	-0.267808	-0.140456	-0.0938618	-0.157323	-0.155387	-0.220325	-0.177761	-0.143219	-0.205446	-0.218644	-0.173725	-0.137312	-0.172984	-0.175402	-0.131347	-0.106839	-0.0699945	-0.110269	-0.0998091	-0.0228167	0.018144	-0.0328628	-0.113899	-0.184479	-0.238675	-0.286383	-0.288541	-0.318006	-0.337824	-0.367722	-0.399779	-0.380569	-0.368126	-0.280555	-0.335313	-0.384391	-0.356048
227	-0.0087043	-0.0196892	-0.0265091	-0.0374403	-0.119305	-0.160447	-0.25683	-0.264549	-0.334057	-0.309755	-0.306914	-0.241761	-0.274392	-0.133408	-0.0853931	-0.138109	-0.134763	-0.21696	-0.185403	-0.164177	-0.227808	-0.228957	-0.173745	-0.143443	-0.183507	-0.175082	-0.130932	-0.112662	-0.0699628	-0.128034	-0.120418	-0.0302664	0.0140682	-0.051045	-0.142622	-0.211478	-0.265712	-0.304618	-0.305469	-0.328687	-0.358837	-0.387347	-0.441257	-0.424564	-0.412212	-0.318987	-0.378953	-0.434717	-0.399888
228	0.0109702	0.00659264	0.00774722	-0.0058459	-0.0961971	-0.14204	-0.245765	-0.259277	-0.333743	-0.322016	-0.336859	-0.270594	-0.29769	-0.141846	-0.0803517	-0.134862	-0.133937	-0.237107	-0.216536	-0.188945	-0.247306	-0.247084	-0.193561	-0.149824	-0.18638	-0.180777	-0.130198	-0.108927	-0.0672373	-0.120498	-0.106464	-0.0127763	0.0324164	-0.0329369	-0.137396	-0.201734	-0.254704	-0.289399	-0.289156	-0.324086	-0.377233	-0.408324	-0.484596	-0.464484	-0.462905	-0.373982	-0.432868	-0.481091	-0.447841
229	0.0104828	0.0179566	0.0265784	0.0293592	-0.0249846	-0.0611194	-0.161199	-0.180067	-0.265277	-0.28435	-0.333136	-0.299387	-0.313519	-0.178807	-0.123901	-0.178681	-0.17136	-0.257378	-0.214433	-0.177028	-0.222992	-0.234481	-0.193315	-0.14122	-0.168412	-0.172045	-0.126252	-0.0940437	-0.054151	-0.0652857	-0.0418507	0.0317286	0.0854171	0.0485364	-0.0431739	-0.119685	-0.171771	-0.20749	-0.229699	-0.291937	-0.354712	-0.399147	-0.469872	-0.460448	-0.479687	-0.405473	-0.435397	-0.455758	-0.430366
230	0.00358859	0.0123043	0.0151045	0.011224	-0.0263542	-0.0517383	-0.139657	-0.158539	-0.231757	-0.248623	-0.289149	-0.268026	-0.2998	-0.182136	-0.13809	-0.186217	-0.177773	-0.245871	-0.196857	-0.174776	-0.214497	-0.225204	-0.184779	-0.13708	-0.164359	-0.165457	-0.127331	-0.0969015	-0.0546365	-0.061991	-0.0428649	0.0242146	0.083489	0.0471089	-0.0334448	-0.104789	-0.154357	-0.188114	-0.207272	-0.262065	-0.315563	-0.369161	-0.431127	-0.432799	-0.453535	-0.381905	-0.401554	-0.422716	-0.395423
231	0.0134845	0.0240511	0.022446	0.0115362	-0.0351539	-0.0690188	-0.155662	-0.167403	-0.241039	-0.253357	-0.284026	-0.258594	-0.297339	-0.166289	-0.119606	-0.167193	-0.164494	-0.246163	-0.208805	-0.18475	-0.226961	-0.229539	-0.193048	-0.145478	-0.168346	-0.17155	-0.126012	-0.100478	-0.0575731	-0.078562	-0.0564179	0.0208747	0.0745574	0.0284113	-0.0631412	-0.124127	-0.167213	-0.194179	-0.20485	-0.257561	-0.310622	-0.369768	-0.436582	-0.435546	-0.454454	-0.384813	-0.412687	-0.435013	-0.400137
232	0.0262861	0.0442635	0.0487218	0.0491775	0.0133687	-0.0208844	-0.112147	-0.128931	-0.213808	-0.246943	-0.299119	-0.277372	-0.302475	-0.180396	-0.126495	-0.175608	-0.166622	-0.252595	-0.212344	-0.179433	-0.211548	-0.216961	-0.183727	-0.128739	-0.14958	-0.161734	-0.112676	-0.078856	-0.0376362	-0.0411123	-0.0174968	0.0507148	0.10476	0.0717194	-0.017537	-0.0831392	-0.12463	-0.148519	-0.178954	-0.248101	-0.320182	-0.373768	-0.441902	-0.440902	-0.471819	-0.414558	-0.434014	-0.440642	-0.410923
233	0.0449696	0.0546721	0.055601	0.0509524	-0.0143011	-0.0686557	-0.159507	-0.175465	-0.258909	-0.273463	-0.30467	-0.260527	-0.281466	-0.142381	-0.0791472	-0.125011	-0.122044	-0.227873	-0.20346	-0.180394	-0.227043	-0.215736	-0.171619	-0.127317	-0.152058	-0.152305	-0.0950989	-0.0663351	-0.0284246	-0.0682726	-0.044743	0.041792	0.0804312	0.029498	-0.0694409	-0.125598	-0.167594	-0.193684	-0.214372	-0.262773	-0.329758	-0.37325	-0.449047	-0.437141	-0.459651	-0.40107	-0.443197	-0.461435	-0.430184
234	0.0659468	0.0797205	0.0934819	0.101549	0.0432004	-0.0112983	-0.115617	-0.156165	-0.253463	-0.275988	-0.316086	-0.283187	-0.304428	-0.173531	-0.100881	-0.153473	-0.151443	-0.252751	-0.222019	-0.192301	-0.229253	-0.221693	-0.17937	-0.118871	-0.141428	-0.143648	-0.0759101	-0.0394913	0.00380985	-0.0223264	0.00161381	0.0779474	0.112532	0.0661561	-0.0262798	-0.0785385	-0.123992	-0.163215	-0.216062	-0.260132	-0.341554	-0.383315	-0.457383	-0.446998	-0.494447	-0.452377	-0.483966	-0.483489	-0.461371
235	0.0780383	0.100238	0.13361	0.152001	0.124139	0.084485	-0.0218709	-0.0854077	-0.187588	-0.224955	-0.285802	-0.26891	-0.310355	-0.221936	-0.172894	-0.231164	-0.223555	-0.283066	-0.22237	-0.187633	-0.196712	-0.197956	-0.172445	-0.0947984	-0.109484	-0.119274	-0.0579538	-0.00770093	0.0402735	0.0478992	0.0680314	0.112156	0.149253	0.120126	0.0444113	0.00248091	-0.0272597	-0.0711699	-0.157245	-0.203677	-0.306017	-0.348083	-0.416934	-0.418816	-0.487659	-0.464512	-0.460558	-0.440396	-0.432374
236	0.0326352	0.0501067	0.0852755	0.112737	0.0950593	0.0532616	-0.0540059	-0.120561	-0.200183	-0.234189	-0.28331	-0.267159	-0.319495	-0.242733	-0.193824	-0.253051	-0.243369	-0.289511	-0.222491	-0.172282	-0.191166	-0.200435	-0.172288	-0.093157	-0.106634	-0.116227	-0.064746	-0.0188015	0.0303185	0.0287007	0.0520925	0.102318	0.131282	0.100953	0.0285631	-0.00999946	-0.055075	-0.105871	-0.165535	-0.218112	-0.284172	-0.342579	-0.410354	-0.40927	-0.471383	-0.444166	-0.454916	-0.437538	-0.427851
237	-0.00923671	-0.0090354	0.0170703	0.0368497	-0.000223006	-0.0399124	-0.136645	-0.196579	-0.251532	-0.252653	-0.272283	-0.242306	-0.273426	-0.193527	-0.138977	-0.194192	-0.184347	-0.23831	-0.191129	-0.140141	-0.182946	-0.186819	-0.152868	-0.0923726	-0.114808	-0.112707	-0.0699104	-0.0395061	0.0043522	-0.0317669	-0.00783317	0.0583229	0.0768617	0.032132	-0.0463222	-0.0780021	-0.140388	-0.190708	-0.209984	-0.251684	-0.283328	-0.334369	-0.391005	-0.373114	-0.403399	-0.357911	-0.405769	-0.414775	-0.396352
238	-0.0327412	-0.0343627	-0.00217908	0.00106418	-0.0448517	-0.0830788	-0.158869	-0.217072	-0.246732	-0.22501	-0.220267	-0.169775	-0.198329	-0.125137	-0.0577195	-0.0985633	-0.0884576	-0.145906	-0.138037	-0.0986046	-0.146343	-0.154675	-0.125696	-0.083561	-0.102051	-0.101197	-0.0704611	-0.0481717	-0.0240821	-0.0569728	-0.0419666	0.0101628	0.0186574	-0.0241693	-0.0919132	-0.111296	-0.153266	-0.200939	-0.216855	-0.224783	-0.243108	-0.274525	-0.323958	-0.292987	-0.310943	-0.269536	-0.321183	-0.336355	-0.326995
239	-0.0544089	-0.067181	-0.0600802	-0.0979153	-0.19696	-0.2344	-0.288852	-0.294053	-0.318525	-0.266489	-0.224646	-0.128443	-0.0922198	0.0189138	0.101097	0.0808686	0.0569099	-0.0360625	-0.10727	-0.0995263	-0.167198	-0.155046	-0.133443	-0.129494	-0.146064	-0.136385	-0.117778	-0.117465	-0.11619	-0.179999	-0.18092	-0.112053	-0.101767	-0.153247	-0.229599	-0.253469	-0.288252	-0.310839	-0.283644	-0.266112	-0.258481	-0.244614	-0.282339	-0.237455	-0.202736	-0.132344	-0.21217	-0.264999	-0.252107
240	-0.0725529	-0.0809358	-0.0651989	-0.113115	-0.208919	-0.217363	-0.229041	-0.195967	-0.196021	-0.14038	-0.0953909	0.00223443	0.137067	0.207763	0.292618	0.296487	0.235827	0.154128	0.0107672	-0.0139033	-0.0663422	-0.0448877	-0.0625393	-0.105314	-0.0991772	-0.0933046	-0.108618	-0.123224	-0.16366	-0.198095	-0.204115	-0.160798	-0.159634	-0.189716	-0.231679	-0.236128	-0.234229	-0.220058	-0.183559	-0.134689	-0.101223	-0.0477436	-0.0533833	-0.0173529	0.0384115	0.0761446	0.0272322	-0.0225927	-0.0262335
241	-0.0748547	-0.0744091	-0.0553507	-0.101538	-0.1818	-0.184051	-0.166677	-0.126879	-0.116199	-0.0783754	-0.0400165	0.0486677	0.235904	0.317395	0.410613	0.464489	0.321834	0.243323	0.0605799	0.00511511	-0.0253407	0.00295441	-0.0517741	-0.107406	-0.0732534	-0.0642127	-0.0941712	-0.123599	-0.184496	-0.189455	-0.196519	-0.190883	-0.197052	-0.196485	-0.199556	-0.19597	-0.172171	-0.141406	-0.122076	-0.0532472	-0.0181743	0.0529828	0.0507267	0.0646696	0.124174	0.146173	0.129403	0.0890748	0.0681949
242	-0.088107	-0.0855746	-0.0750488	-0.129197	-0.217828	-0.234234	-0.23445	-0.210159	-0.210484	-0.178133	-0.130172	-0.0197017	0.154048	0.210477	0.35761	0.417538	0.324297	0.204612	0.00680695	-0.0204005	-0.0729577	-0.0632647	-0.0934342	-0.13486	-0.110403	-0.0961207	-0.111978	-0.139345	-0.19485	-0.208033	-0.218721	-0.208445	-0.211401	-0.214591	-0.221975	-0.240668	-0.234501	-0.225305	-0.210823	-0.151076	-0.121254	-0.0569684	-0.0519442	-0.0247815	0.0310117	0.0685035	0.0396024	-0.00534033	-0.0238026
243	-0.0704252	-0.0705794	-0.0632259	-0.100639	-0.16058	-0.187732	-0.219739	-0.218096	-0.229283	-0.209351	-0.202735	-0.113293	0.00247129	0.0229683	0.136834	0.154166	0.124235	0.0616045	-0.0344348	-0.000759371	-0.0494441	-0.051319	-0.0772334	-0.0820882	-0.0765527	-0.0823061	-0.0861508	-0.0962123	-0.11124	-0.120858	-0.12509	-0.0822258	-0.0766989	-0.10452	-0.14128	-0.190672	-0.218744	-0.221668	-0.213258	-0.193104	-0.175699	-0.153612	-0.159389	-0.124475	-0.102913	-0.0627782	-0.103408	-0.143412	-0.153797
244	-0.0375532	-0.0284042	-0.0468162	-0.0736756	-0.085348	-0.119186	-0.133115	-0.133253	-0.133387	-0.134329	-0.156386	-0.110897	-0.0368978	-0.0791704	-0.0298766	-0.0126267	-0.0245639	-0.00538629	-0.0142869	0.0245184	0.0103746	-0.0149052	-0.0432421	-0.0403093	-0.0499473	-0.0629414	-0.061583	-0.0670958	-0.0650372	-0.0555683	-0.0452579	-0.00544921	-0.00251119	-0.0284952	-0.0639337	-0.101306	-0.14235	-0.142121	-0.12296	-0.136723	-0.113958	-0.115414	-0.106713	-0.0898019	-0.0824126	-0.0604565	-0.0793324	-0.108103	-0.112732
245	-0.0597222	-0.0551809	-0.0820506	-0.121956	-0.147799	-0.182221	-0.187638	-0.197866	-0.177895	-0.167477	-0.164158	-0.104892	-0.0249393	-0.0412954	0.0227635	0.0464651	0.0304235	0.0120645	-0.0265918	-0.00165802	-0.0187645	-0.0418845	-0.0594922	-0.062017	-0.0708161	-0.074397	-0.0678117	-0.0781571	-0.0920902	-0.0980848	-0.101336	-0.0811215	-0.0798585	-0.0977898	-0.10718	-0.142366	-0.193802	-0.204202	-0.184173	-0.180675	-0.139431	-0.124166	-0.105067	-0.0698098	-0.056097	-0.0356651	-0.0603377	-0.0932601	-0.105356
246	-0.0777771	-0.0748459	-0.0935044	-0.130632	-0.176602	-0.212862	-0.250753	-0.275054	-0.272131	-0.255864	-0.247036	-0.173804	-0.0901583	-0.0586028	0.0410139	0.046136	0.0501728	-0.0258433	-0.0799427	-0.0302644	-0.0753928	-0.0882569	-0.0922727	-0.0931568	-0.106219	-0.0997545	-0.0803411	-0.0911039	-0.0945661	-0.115799	-0.127476	-0.0936167	-0.0819236	-0.106875	-0.122907	-0.187135	-0.248919	-0.271825	-0.279926	-0.270269	-0.240976	-0.220334	-0.208271	-0.160054	-0.146321	-0.10976	-0.152661	-0.188415	-0.201734
247	-0.0410036	-0.0430316	-0.0726107	-0.0837169	-0.0749246	-0.0959972	-0.147331	-0.18204	-0.195165	-0.204211	-0.245807	-0.218923	-0.151765	-0.169922	-0.139212	-0.15327	-0.137875	-0.12625	-0.0651629	0.0282106	0.0072156	-0.0103729	-0.0224778	-0.000237963	-0.0128959	-0.0225648	-0.0112411	-0.0129359	0.00970866	0.00820506	0.0136428	0.0636608	0.0828385	0.04692	0.0111601	-0.0687642	-0.140054	-0.167325	-0.189004	-0.221232	-0.216057	-0.229779	-0.203682	-0.180555	-0.186093	-0.154362	-0.18078	-0.215029	-0.21813
248	-0.0403336	-0.0445948	-0.0871947	-0.128846	-0.12815	-0.152021	-0.182799	-0.197347	-0.194028	-0.201017	-0.221887	-0.173987	-0.111897	-0.12785	-0.0959038	-0.0998126	-0.0748216	-0.095474	-0.0761541	-0.00863562	-0.0291054	-0.0552625	-0.0549803	-0.0363544	-0.0544369	-0.0669309	-0.0419682	-0.0521337	-0.0331599	-0.0418898	-0.0412937	-0.00523626	0.0135919	-0.0156476	-0.0433334	-0.103057	-0.178606	-0.195576	-0.192106	-0.22675	-0.199282	-0.203115	-0.177965	-0.147414	-0.1361	-0.100247	-0.13907	-0.176233	-0.176356
249	-0.045692	-0.0507813	-0.08498	-0.116687	-0.127389	-0.162166	-0.185085	-0.222448	-0.211625	-0.198459	-0.207088	-0.152764	-0.0931912	-0.1041	-0.0555967	-0.0601453	-0.0375521	-0.0640024	-0.0608005	-0.00791596	-0.034607	-0.0573458	-0.0534774	-0.039141	-0.0616557	-0.0677848	-0.0378141	-0.0476615	-0.0394841	-0.0571225	-0.0651	-0.0485791	-0.0472153	-0.0685478	-0.0759236	-0.115296	-0.183195	-0.21622	-0.23017	-0.234564	-0.198933	-0.184034	-0.163933	-0.119261	-0.110253	-0.0876712	-0.129472	-0.158876	-0.165471
250	-0.0185893	-0.0246182	-0.0461085	-0.0543272	-0.0789308	-0.113058	-0.147785	-0.167667	-0.197011	-0.186693	-0.212866	-0.175188	-0.0840255	-0.0722744	-0.029335	-0.031026	-0.0397565	-0.0671087	-0.0728299	-0.0158116	-0.0332398	-0.0497948	-0.0693565	-0.0540855	-0.0612025	-0.0753862	-0.0570462	-0.0598836	-0.0593256	-0.064347	-0.0669264	-0.0382561	-0.0259545	-0.0439866	-0.0626734	-0.111646	-0.150836	-0.179249	-0.208092	-0.206262	-0.203715	-0.18455	-0.170489	-0.135633	-0.116292	-0.087903	-0.112833	-0.148533	-0.154431
251	-0.036663	-0.0408148	-0.0874014	-0.1033	-0.104163	-0.121908	-0.161777	-0.141801	-0.17099	-0.192389	-0.225088	-0.190851	-0.101455	-0.0912843	-0.0667476	-0.0761024	-0.0753437	-0.108044	-0.101808	-0.026948	-0.0471833	-0.0775424	-0.08212	-0.0578571	-0.0702777	-0.0917973	-0.0743416	-0.0778858	-0.0609467	-0.0683524	-0.0612372	-0.00755318	0.0257497	0.00116129	-0.0378341	-0.108845	-0.166646	-0.166659	-0.147615	-0.207925	-0.190871	-0.196931	-0.182191	-0.158742	-0.129158	-0.0874669	-0.115826	-0.155487	-0.147157
252	-0.031068	-0.0223701	-0.0577766	-0.0910199	-0.16846	-0.191909	-0.250864	-0.162951	-0.25692	-0.285258	-0.316564	-0.252412	-0.113545	0.0176678	0.081888	0.0836894	0.0410783	-0.118231	-0.230196	-0.168101	-0.200976	-0.239128	-0.24053	-0.215791	-0.216712	-0.23631	-0.222497	-0.22131	-0.214454	-0.222244	-0.205724	-0.119414	-0.0431675	-0.0667575	-0.150198	-0.252921	-0.278758	-0.232541	-0.181595	-0.255247	-0.279169	-0.282108	-0.314702	-0.276183	-0.224275	-0.142475	-0.172512	-0.221988	-0.205453
253	0.0255643	0.012924	0.00853913	0.028698	0.0041086	-0.0270066	-0.0715676	-0.0135052	-0.0844897	-0.0959044	-0.122062	-0.139898	-0.115218	-0.0833477	-0.0937195	-0.0905237	-0.121907	-0.121513	-0.12055	-0.0705255	-0.0796132	-0.147091	-0.14335	-0.0876464	-0.104332	-0.148247	-0.147054	-0.124693	-0.0908785	-0.075965	-0.0627077	0.0191316	0.0519479	0.0193772	-0.0454272	-0.102412	-0.100203	-0.0772641	-0.0150877	-0.0845112	-0.110075	-0.158417	-0.181494	-0.18643	-0.163861	-0.114138	-0.107385	-0.138333	-0.112507
254	-0.00680855	-0.00913699	0.0145614	0.0414922	0.0376482	0.0169561	-0.0383466	-0.0384398	-0.0837001	-0.104675	-0.1062	-0.133415	-0.162193	-0.162086	-0.139233	-0.140058	-0.130744	-0.145926	-0.17193	-0.149447	-0.143945	-0.20677	-0.195122	-0.115482	-0.125221	-0.171886	-0.151524	-0.11627	-0.086017	-0.0557589	-0.0419937	-0.00726217	0.0220083	0.0280641	0.00791611	-0.0425263	-0.050013	-0.0668326	-0.051483	-0.103692	-0.105976	-0.161061	-0.186805	-0.192069	-0.198078	-0.178158	-0.15918	-0.147268	-0.14104
255	-0.028505	-0.0252612	0.01197	0.0402004	0.0644025	0.0427333	-0.00149615	-0.0463789	-0.0518751	-0.0660091	-0.0473052	-0.0739194	-0.148732	-0.190731	-0.165548	-0.166186	-0.130771	-0.1136	-0.116049	-0.118543	-0.107979	-0.158178	-0.141377	-0.0693339	-0.0864426	-0.117433	-0.0958734	-0.0601253	-0.027927	-0.00772467	0.00131106	0.0116298	0.0196885	0.0305351	0.0358016	0.0110691	0.000764495	-0.0400538	-0.051826	-0.0818405	-0.0648529	-0.113076	-0.131768	-0.143981	-0.173815	-0.182855	-0.166307	-0.129332	-0.13373
256	-0.0195586	-0.0135905	0.0161209	0.0555991	0.0992616	0.0863947	0.045922	0.0170405	0.0100484	-0.0220506	-0.0200133	-0.0586687	-0.162666	-0.199701	-0.190185	-0.193395	-0.141128	-0.128038	-0.11428	-0.114971	-0.0977632	-0.144552	-0.12291	-0.0439238	-0.0588876	-0.094666	-0.071338	-0.032671	0.0154064	0.0352951	0.0534363	0.0576435	0.0789425	0.0894668	0.086663	0.0656387	0.0580031	0.0258767	0.0111371	-0.0296848	-0.022872	-0.0872677	-0.118261	-0.140072	-0.18395	-0.198133	-0.176803	-0.124999	-0.126769
257	-0.0258438	-0.0237919	-0.0160474	0.00632981	0.0410822	0.0347251	0.0073585	-0.0243573	-0.0106436	-0.0312225	-0.024254	-0.0280365	-0.102423	-0.135173	-0.138081	-0.137278	-0.103522	-0.0951791	-0.0977426	-0.0957245	-0.0881011	-0.130569	-0.113563	-0.0536281	-0.0657433	-0.092141	-0.0772956	-0.0525328	-0.0141015	0.000907362	0.0202265	0.0347736	0.0562928	0.0588948	0.0408497	0.0233168	0.0135138	-0.00747854	-0.0182353	-0.0394741	-0.0199342	-0.0638732	-0.083151	-0.0993041	-0.120019	-0.122913	-0.116735	-0.0878174	-0.0913332
258	-0.0708079	-0.0716741	-0.0365128	-0.0120503	0.00467663	0.000162923	-0.0288999	-0.0846734	-0.0535576	-0.0369433	0.00463921	0.00535526	-0.0408535	-0.0781572	-0.0543006	-0.0581528	-0.0307368	-0.021796	-0.0485848	-0.051895	-0.059303	-0.0972937	-0.0760503	-0.029342	-0.0388645	-0.0622474	-0.0526872	-0.0303467	-0.0106321	0.00147742	0.00619483	-0.00345314	-0.00492379	0.0044371	0.000974606	0.00238684	-0.0174369	-0.0618654	-0.0691631	-0.0481753	-0.0112911	-0.0238063	-0.0308264	-0.031357	-0.0411806	-0.0511708	-0.0614795	-0.0396549	-0.0495146
259	-0.109901	-0.114529	-0.0901512	-0.0694468	-0.0752849	-0.0656693	-0.0787051	-0.144872	-0.108684	-0.0526642	-0.00389561	0.0247682	0.0268705	0.0264142	0.0445317	0.0290441	0.0514246	0.0455155	0.00980314	0.00615251	-0.0140711	-0.0299861	-0.00348895	0.0190916	0.0108049	-0.00797766	0.00664521	0.018158	0.0190729	7.1702e-05	-0.00865327	-0.0251672	-0.0400471	-0.0462844	-0.0411658	-0.0270232	-0.0528624	-0.113495	-0.137816	-0.0748836	-0.0354958	-0.0118506	-0.011217	0.0189842	0.0194828	0.0113319	-0.0249773	-0.0186539	-0.0282117
260	-0.0737461	-0.0738146	-0.054446	-0.0455728	-0.0296439	-0.0193026	-0.0123307	-0.0577911	-0.0226871	0.0218175	0.0729638	0.0874483	0.100299	0.0762739	0.0905746	0.0881736	0.0782713	0.0767388	0.0362136	0.0221697	0.0152763	0.00143751	-0.00444782	0.00411654	0.0169039	-0.0091775	-0.0154868	-0.00260682	-0.0245435	-0.00536035	-0.0247742	-0.0709809	-0.0884643	-0.0753645	-0.0494684	-0.0227164	0.00766261	-0.0326148	-0.0647923	0.011763	0.0478711	0.0775783	0.104088	0.119468	0.123191	0.100003	0.105118	0.12177	0.101905
261	-0.0230526	-0.0245221	0.00721983	0.0178293	0.0497798	0.0560846	0.0710231	0.00162734	0.0489069	0.0808462	0.117868	0.0938513	0.0578744	0.00521543	0.0110639	0.0136657	0.0211458	0.0426467	0.028389	0.0172729	0.0201008	0.000832628	0.00138695	0.0349691	0.0310688	-0.00230734	0.00224646	0.019032	0.0289111	0.0460919	0.0253707	-0.0232498	-0.0425233	-0.0342262	0.00657804	0.0437659	0.0892658	0.0432995	-0.00293821	0.0691736	0.0968159	0.110074	0.121811	0.121237	0.103879	0.0665663	0.0827996	0.114024	0.107628
262	-0.00902728	-0.0137071	0.0354742	0.0453823	0.0661649	0.0634373	0.0740491	-0.0316231	0.0233792	0.0545827	0.0750625	0.0521847	0.00278083	-0.0360783	-0.0533943	-0.055659	-0.0389876	-0.00409094	0.0105941	0.0100171	0.0104643	-0.0041715	0.00923669	0.0622875	0.0615627	0.0276111	0.0449679	0.0634856	0.0795076	0.0708696	0.0485772	0.00259327	-0.0116125	-0.0123273	0.0304137	0.0512353	0.0821133	0.0215181	-0.0405227	0.0335773	0.0541116	0.0663164	0.0717976	0.08599	0.0597523	0.022977	0.0180296	0.0452329	0.041012
263	-0.101586	-0.0898604	-0.082813	-0.115755	-0.15526	-0.120962	-0.117798	-0.126958	-0.0922047	-0.0373648	0.0172126	0.0757964	0.121976	0.155295	0.18762	0.179614	0.166327	0.113923	0.0323151	0.0406675	0.0116432	0.00781131	0.0114379	-0.00162239	-0.0135274	-0.0448487	-0.0494242	-0.0559917	-0.0568297	-0.0468686	-0.0789733	-0.121832	-0.118804	-0.111635	-0.0669137	-0.0803957	-0.0749492	-0.106464	-0.131966	-0.0524248	-0.00536625	0.0590569	0.0791883	0.124912	0.146696	0.142421	0.108772	0.107027	0.10522
264	-0.109181	-0.108713	-0.132202	-0.15636	-0.158842	-0.13647	-0.124523	-0.104822	-0.0760458	-0.0295931	0.000795665	0.0649947	0.125868	0.147973	0.157058	0.144144	0.131401	0.104594	0.0581373	0.0718454	0.0468944	0.0543644	0.0230284	-0.000867169	0.00894195	-0.0132571	-0.0410968	-0.0516014	-0.0653001	-0.0654488	-0.0596154	-0.0683312	-0.076737	-0.0664348	-0.0734511	-0.0779253	-0.10403	-0.112561	-0.0815553	-0.0468856	-0.0158034	0.0289731	0.052328	0.0967699	0.129583	0.145065	0.107471	0.0860986	0.0721594
265	-0.0905695	-0.0978228	-0.127126	-0.136889	-0.129689	-0.10442	-0.106082	-0.104023	-0.0787607	-0.0351229	-0.00646892	0.058099	0.11987	0.11195	0.124574	0.0936291	0.0955756	0.103156	0.0783562	0.0914221	0.0898283	0.0793745	0.0318758	0.0143646	0.0432303	0.0149731	-0.0267778	-0.0246356	-0.0466083	-0.0247573	-0.0129237	-0.0325713	-0.0378755	-0.0106942	-0.0223995	-0.0316041	-0.0835255	-0.0979969	-0.0687859	-0.052715	-0.0212202	0.0265433	0.0484818	0.0817863	0.120167	0.132438	0.104713	0.0792161	0.0558018
266	-0.0785035	-0.0894472	-0.103629	-0.129002	-0.157584	-0.142541	-0.14153	-0.136585	-0.113516	-0.0719383	-0.0375284	0.0366252	0.099117	0.0919718	0.0941247	0.0685955	0.0859531	0.0818093	0.0610678	0.0798247	0.0628319	0.0592659	0.0223799	-0.00278295	0.018613	0.00604289	-0.0241681	-0.0318707	-0.0508509	-0.0634662	-0.0614904	-0.0554367	-0.0713749	-0.0640165	-0.0849639	-0.0886619	-0.124405	-0.135763	-0.103103	-0.0856303	-0.0617776	-0.0105406	0.0169283	0.048877	0.0989513	0.133866	0.0907801	0.0538112	0.042749
267	-0.14487	-0.155313	-0.157216	-0.196495	-0.249029	-0.234399	-0.241239	-0.226409	-0.212262	-0.136362	-0.0778302	0.0436275	0.119081	0.155093	0.213105	0.186263	0.219754	0.1421	0.0325621	0.0412034	-0.00610073	0.0115042	-0.0129374	-0.0493143	-0.0255599	-0.0279832	-0.0527829	-0.0545431	-0.0842437	-0.12982	-0.138414	-0.109915	-0.123843	-0.145584	-0.16945	-0.174595	-0.21135	-0.228525	-0.20186	-0.142769	-0.114863	-0.0413188	-0.0264252	0.0238179	0.0959568	0.149679	0.0801573	0.0232419	0.021127
268	-0.214572	-0.226101	-0.220596	-0.244833	-0.26638	-0.253564	-0.277884	-0.272243	-0.254017	-0.160809	-0.1263	0.0174926	0.141675	0.190082	0.240094	0.200622	0.24395	0.168832	0.0875294	0.128243	0.0483713	0.0575813	0.0394976	-0.0178177	-0.0142175	-0.0104331	-0.037561	-0.0553883	-0.0892607	-0.137841	-0.14105	-0.10217	-0.114537	-0.142068	-0.192789	-0.201056	-0.251975	-0.266527	-0.236674	-0.192683	-0.150942	-0.0883722	-0.0622042	-0.00018631	0.0852	0.162712	0.0732713	0.000425745	0.0117425
269	-0.179004	-0.190667	-0.177369	-0.219476	-0.279769	-0.274064	-0.25691	-0.221504	-0.181324	-0.065141	0.0115726	0.130947	0.185541	0.213987	0.343087	0.329224	0.438711	0.307591	0.164422	0.157064	0.0692224	0.0756957	0.0711611	-0.0207993	-0.0479721	-0.0284119	-0.042774	-0.0685044	-0.0997162	-0.161373	-0.192672	-0.175025	-0.198115	-0.220824	-0.231996	-0.217548	-0.218153	-0.227089	-0.191425	-0.11282	-0.0833048	-0.00986877	0.0115936	0.0750497	0.163682	0.224983	0.134143	0.0800339	0.0945359
270	-0.150398	-0.158912	-0.156115	-0.199351	-0.240102	-0.232439	-0.208411	-0.148663	-0.0988132	0.00451852	0.0877761	0.158851	0.139277	0.149782	0.276385	0.268417	0.378135	0.253282	0.133166	0.118572	0.0316677	0.0245619	0.0349846	-0.0335957	-0.0722383	-0.0648592	-0.0623108	-0.0793982	-0.0853343	-0.138945	-0.171145	-0.158199	-0.17682	-0.196681	-0.200399	-0.182497	-0.173696	-0.164395	-0.116302	-0.0537305	-0.0322833	0.00771335	0.0163478	0.04957	0.111553	0.168969	0.08985	0.0502814	0.079875
271	-0.168075	-0.177701	-0.171993	-0.19292	-0.189635	-0.170734	-0.131165	-0.0699886	-0.00961385	0.0846189	0.101927	0.149583	0.142856	0.129414	0.183493	0.171579	0.273179	0.20707	0.147092	0.187514	0.109414	0.080135	0.0824384	0.0349784	-0.0102473	-0.0172017	-0.0225845	-0.0407057	-0.0269129	-0.0633053	-0.103025	-0.0887482	-0.102287	-0.123687	-0.136677	-0.124856	-0.109036	-0.0828954	-0.0409396	0.00621987	0.0187935	0.0338948	0.0306342	0.0408897	0.0908498	0.143348	0.0753345	0.0526864	0.0910381
272	-0.150074	-0.150919	-0.128027	-0.145978	-0.142812	-0.128274	-0.108659	-0.0604704	-0.0396339	0.0100936	0.0116838	0.0583738	0.0796567	0.106338	0.0843321	0.0742926	0.113997	0.0636734	0.00794799	0.0548798	0.0109537	-0.00473458	-0.0182392	-0.0388095	-0.052433	-0.0528229	-0.0431402	-0.0585333	-0.0561595	-0.0788595	-0.0996162	-0.0868851	-0.0783347	-0.082877	-0.0994585	-0.11333	-0.119856	-0.0908373	-0.0673733	-0.0478764	-0.0434341	-0.0383501	-0.0391634	-0.0255397	0.0158224	0.0719614	0.0317681	0.0201028	0.0478705
273	-0.184529	-0.175596	-0.131908	-0.123046	-0.0512078	-0.0192262	0.0131453	0.091779	0.127841	0.12979	0.107472	0.0643509	0.0138078	0.0228946	-0.0184814	-0.0215624	0.0440663	-0.0109196	-0.0607311	-0.0133118	-0.023695	-0.0596477	-0.0854978	-0.0570119	-0.0600607	-0.0795927	-0.0646122	-0.0577723	-0.0369445	-0.0224101	-0.0348127	-0.0310505	0.00264321	0.00781112	0.0148085	-0.0112504	0.00391484	0.0474996	0.0807992	0.0535889	0.0491683	-0.00872399	0.0038834	-0.0137889	-0.00888735	0.0330446	0.0358713	0.0601467	0.0928021
274	-0.0911706	-0.0841971	-0.0258817	0.0261896	0.0952673	0.108127	0.181941	0.260048	0.33702	0.290488	0.275611	0.135071	0.0256075	-0.0536628	-0.110962	-0.0705267	-0.0225276	-0.00431421	-0.0327191	-0.0276777	0.0113392	-0.0571743	-0.102192	-0.0588225	-0.0471076	-0.0905918	-0.0937822	-0.070191	-0.0562285	0.00416313	-0.00628595	-0.0360684	-0.00603411	0.0265774	0.0781862	0.0733218	0.143253	0.206522	0.248969	0.219469	0.221264	0.154653	0.195463	0.154499	0.151424	0.150274	0.195848	0.243139	0.26285
275	-0.107969	-0.0966774	-0.0331464	0.016981	0.106738	0.115078	0.130671	0.193657	0.207273	0.149475	0.125273	0.00811206	-0.0846587	-0.104782	-0.167685	-0.150293	-0.129262	-0.125916	-0.142624	-0.130415	-0.111625	-0.170549	-0.20431	-0.13155	-0.11272	-0.151876	-0.14545	-0.104514	-0.083795	-0.025273	-0.0217683	-0.0232979	0.0479181	0.0771188	0.0941791	0.03087	0.0717972	0.119747	0.132295	0.0828016	0.0645719	-0.0205874	-0.00230976	-0.0530059	-0.0639838	-0.0359547	0.0108059	0.0413293	0.0631392
276	-0.0886398	-0.0556248	0.0281354	0.112478	0.260935	0.282146	0.299827	0.340115	0.324129	0.219967	0.147582	-0.0142224	-0.110548	-0.163541	-0.226645	-0.20501	-0.185626	-0.154049	-0.141498	-0.120585	-0.0569751	-0.125221	-0.170714	-0.0776479	-0.050211	-0.10536	-0.103546	-0.0458986	-0.0187047	0.089293	0.107047	0.0696039	0.145154	0.207569	0.248056	0.187755	0.238689	0.273859	0.247367	0.166246	0.127913	0.0228156	0.0398628	-0.0279414	-0.0711429	-0.0753043	0.00407203	0.075401	0.095935
277	-0.0717873	-0.0351571	0.0552357	0.168141	0.355059	0.38225	0.413327	0.444407	0.411485	0.309088	0.214744	0.0469997	-0.0574446	-0.155784	-0.223472	-0.203744	-0.174849	-0.121054	-0.0859011	-0.0655218	0.0174579	-0.0521675	-0.0977757	-0.0113096	0.0138063	-0.0434892	-0.03582	0.0168306	0.046652	0.169313	0.193778	0.140815	0.199257	0.276406	0.328576	0.293541	0.357855	0.40574	0.370005	0.280753	0.2315	0.118376	0.122967	0.0441048	-0.0142489	-0.0468699	0.0369851	0.119624	0.13666
278	-0.107476	-0.0744671	0.0139304	0.0936005	0.253633	0.26276	0.246623	0.271689	0.220468	0.144072	0.084087	-0.0364858	-0.169757	-0.19091	-0.217005	-0.215914	-0.166397	-0.178028	-0.157147	-0.131506	-0.0876761	-0.143337	-0.163916	-0.0692935	-0.0535252	-0.10105	-0.0790271	-0.024897	0.0246587	0.103699	0.116868	0.106192	0.195391	0.230773	0.248919	0.160563	0.198862	0.236809	0.197321	0.111943	0.0650249	-0.0552084	-0.0734305	-0.137806	-0.195354	-0.189736	-0.143524	-0.0856713	-0.0575675
279	-0.0790191	-0.0434695	0.0284535	0.105423	0.283569	0.281487	0.218388	0.211637	0.146956	0.0662708	-0.021634	-0.136869	-0.253727	-0.268497	-0.300246	-0.314361	-0.274684	-0.271652	-0.194847	-0.144911	-0.103417	-0.152068	-0.174723	-0.0694026	-0.0552813	-0.107802	-0.0956424	-0.0260603	0.0309203	0.120188	0.135725	0.133678	0.235025	0.263274	0.260006	0.154216	0.176026	0.180474	0.117095	0.028001	-0.0387734	-0.15357	-0.174939	-0.233937	-0.313674	-0.304177	-0.250769	-0.194119	-0.167156
280	-0.0531783	-0.00760809	0.0597638	0.163384	0.386101	0.393688	0.340233	0.304223	0.225844	0.123798	-0.00912351	-0.133846	-0.198632	-0.257757	-0.310424	-0.323555	-0.293288	-0.258815	-0.167226	-0.100616	-0.0318426	-0.0886159	-0.125902	-0.0117386	0.00192849	-0.0607876	-0.050677	0.0166421	0.0773317	0.204227	0.221287	0.182197	0.266795	0.324221	0.351273	0.269987	0.300195	0.2999	0.204295	0.102151	0.0261399	-0.0881472	-0.104054	-0.160738	-0.246797	-0.264114	-0.190513	-0.11616	-0.101879
281	-0.0595056	-0.0117312	0.0701159	0.193687	0.421176	0.427759	0.386664	0.347432	0.26335	0.165776	0.0352351	-0.102999	-0.16939	-0.23788	-0.283859	-0.294108	-0.262019	-0.220046	-0.144673	-0.0829901	-0.00246768	-0.075502	-0.0981325	0.0250931	0.0298834	-0.0460788	-0.0282733	0.0415415	0.108008	0.250438	0.262267	0.209396	0.296586	0.362044	0.414804	0.327653	0.358675	0.37162	0.264429	0.162898	0.0867103	-0.0297403	-0.0509013	-0.109788	-0.197599	-0.230258	-0.153198	-0.0760172	-0.0680812
282	-0.0844808	-0.0575308	0.0131169	0.107569	0.264353	0.253168	0.205407	0.189244	0.108334	0.0270924	-0.0620359	-0.157698	-0.224611	-0.22615	-0.242349	-0.255197	-0.225064	-0.213652	-0.150493	-0.0925369	-0.0531188	-0.123868	-0.116027	-0.00815023	-0.0267654	-0.089322	-0.0658779	-0.00480813	0.0681703	0.153757	0.133923	0.11606	0.235807	0.259283	0.291781	0.162195	0.175735	0.201239	0.115856	0.0172454	-0.0441898	-0.134496	-0.158096	-0.194018	-0.262592	-0.261381	-0.217382	-0.167159	-0.155834
283	-0.0496997	-0.0216799	0.068805	0.183119	0.315147	0.297173	0.255041	0.222311	0.137877	0.0495316	-0.059064	-0.158082	-0.218703	-0.233948	-0.241129	-0.26291	-0.227902	-0.216118	-0.156917	-0.0973934	-0.0395364	-0.118962	-0.10984	0.0102179	-0.00610107	-0.0791586	-0.0491434	0.0230211	0.0975668	0.186628	0.18004	0.160295	0.265819	0.288751	0.321699	0.206398	0.227379	0.257932	0.165597	0.058264	-0.0164339	-0.118423	-0.154346	-0.189581	-0.270715	-0.283317	-0.237941	-0.181587	-0.172045
284	-0.0563606	-0.00972975	0.0985151	0.195059	0.383381	0.385449	0.368666	0.326063	0.2501	0.154374	0.0396735	-0.0811045	-0.150844	-0.217526	-0.232017	-0.241965	-0.194978	-0.166776	-0.111282	-0.0530671	0.0251407	-0.0555868	-0.0651287	0.0521358	0.0542825	-0.0278982	0.00117544	0.0845398	0.149826	0.265831	0.261896	0.19525	0.288925	0.353804	0.421642	0.304343	0.339704	0.37603	0.271432	0.172174	0.10581	0.00155461	-0.0251777	-0.0698789	-0.156788	-0.199826	-0.141571	-0.0699945	-0.0706288
285	-0.106405	-0.072668	0.0121125	0.0821033	0.252349	0.267545	0.261502	0.2671	0.18849	0.109325	0.0250329	-0.0708449	-0.148843	-0.184559	-0.195725	-0.20195	-0.146224	-0.125764	-0.0708937	-0.00277405	0.0427478	-0.0450895	-0.0333418	0.0676506	0.0373072	-0.0375191	-0.00496345	0.0598913	0.139176	0.228748	0.182285	0.130994	0.257644	0.292316	0.346677	0.204214	0.24145	0.294479	0.210872	0.114287	0.0677046	-0.0203626	-0.0327607	-0.0587507	-0.121656	-0.145959	-0.104415	-0.0498234	-0.0462116
286	-0.0951356	-0.0748191	-0.00956737	0.068462	0.191707	0.200104	0.168628	0.166312	0.0823779	0.00739122	-0.0824951	-0.145719	-0.207607	-0.213741	-0.216007	-0.234833	-0.180511	-0.169215	-0.0993662	-0.0150141	0.00786253	-0.0850565	-0.0452277	0.0561192	-0.00447904	-0.0670165	-0.0168923	0.0442253	0.14524	0.185395	0.141777	0.1387	0.262781	0.256352	0.277817	0.135497	0.14849	0.196067	0.12342	0.0112477	-0.0472978	-0.1331	-0.161946	-0.180084	-0.240092	-0.238313	-0.218667	-0.181129	-0.166512
287	-0.0651271	-0.0362047	0.055625	0.140886	0.283943	0.309126	0.282992	0.253551	0.178217	0.0853536	-0.0181356	-0.102285	-0.173142	-0.220383	-0.219332	-0.238639	-0.173119	-0.156992	-0.0825399	-0.00770699	0.0488903	-0.0423759	-0.0168164	0.085539	0.0549941	-0.00553982	0.0480231	0.120284	0.208994	0.258493	0.242143	0.21502	0.316636	0.338225	0.377954	0.231294	0.26202	0.315518	0.226708	0.110899	0.0487788	-0.0487943	-0.0812981	-0.117643	-0.194623	-0.223438	-0.194375	-0.129539	-0.120559
288	-0.137382	-0.112059	-0.0470185	-0.0035445	0.164019	0.22194	0.249581	0.232059	0.210951	0.152074	0.0930651	0.0199161	-0.0699927	-0.160149	-0.161625	-0.180522	-0.0851959	-0.0322771	0.0439614	0.13069	0.193663	0.0963927	0.105038	0.215456	0.162726	0.062654	0.105734	0.181812	0.287063	0.353648	0.267219	0.159938	0.245944	0.290902	0.40168	0.237373	0.279043	0.308412	0.215507	0.158672	0.146486	0.0827948	0.0811152	0.0639802	-0.00417194	-0.0555172	-0.0380333	0.0307426	0.0317995
289	-0.182305	-0.175687	-0.14695	-0.101208	0.0416688	0.100928	0.112908	0.125699	0.096185	0.0901925	0.0408189	0.00177051	-0.0949903	-0.176495	-0.181642	-0.208669	-0.10145	-0.00984959	0.104714	0.223758	0.250537	0.136983	0.186636	0.300067	0.177288	0.0752221	0.134604	0.201607	0.354979	0.362035	0.245415	0.207548	0.279303	0.237945	0.292512	0.179506	0.165961	0.175017	0.107528	0.0665443	0.058264	0.00773468	0.00363024	0.00478648	-0.041301	-0.0629341	-0.0790668	-0.0462845	-0.0277914
290	-0.164127	-0.15652	-0.117628	-0.0599757	0.0656419	0.116401	0.10744	0.108247	0.0730918	0.0614177	-0.0177701	-0.0580312	-0.162584	-0.226985	-0.231298	-0.266089	-0.158315	-0.0664258	0.0798886	0.221074	0.249086	0.137842	0.213309	0.339894	0.206173	0.117254	0.198488	0.261506	0.428465	0.399133	0.296036	0.308939	0.346326	0.255972	0.270614	0.181456	0.156672	0.164565	0.106068	0.0551695	0.011434	-0.0593999	-0.0845197	-0.0869924	-0.151196	-0.168617	-0.188041	-0.155178	-0.129202
291	-0.170178	-0.156137	-0.114158	-0.0632246	0.0776911	0.146937	0.162966	0.144915	0.133486	0.127724	0.0668219	0.0256893	-0.0802484	-0.176095	-0.192047	-0.225154	-0.108881	0.00309023	0.158509	0.300575	0.342385	0.243891	0.314227	0.449329	0.322106	0.213491	0.285598	0.351827	0.523221	0.50561	0.372003	0.322745	0.334717	0.26829	0.33107	0.238136	0.231039	0.236156	0.154944	0.133681	0.111462	0.0476697	0.0372048	0.0242131	-0.0409651	-0.0824373	-0.100031	-0.0572054	-0.0379447
292	-0.169455	-0.166257	-0.148204	-0.123176	-0.0110267	0.0553768	0.0878228	0.0884876	0.0988279	0.118002	0.0800673	0.0659448	0.0190995	-0.0911055	-0.106489	-0.130191	-0.00956928	0.112963	0.258335	0.397725	0.417419	0.326807	0.368795	0.435198	0.305557	0.210091	0.244118	0.279901	0.416539	0.405767	0.263628	0.19648	0.208052	0.164472	0.23631	0.162782	0.170352	0.172684	0.105938	0.115073	0.113928	0.0872905	0.0954975	0.102997	0.069531	0.0330154	0.0142979	0.0403978	0.0492243
293	-0.171671	-0.172114	-0.168509	-0.144618	-0.0661659	-0.0163701	-0.00896132	0.00127115	-0.00220735	0.0381562	0.00956893	0.0211099	-0.054006	-0.116372	-0.120759	-0.152982	-0.036895	0.0578482	0.207554	0.346342	0.329378	0.236937	0.319502	0.380066	0.209218	0.146853	0.218146	0.232221	0.384118	0.317746	0.195123	0.192636	0.19434	0.108001	0.137864	0.0845592	0.061771	0.0579347	0.0187135	0.0223041	0.0123121	-0.0162276	-0.0243871	-0.00575161	-0.0295573	-0.0353562	-0.0780413	-0.0758577	-0.0519821
294	-0.160126	-0.160679	-0.159956	-0.143264	-0.0751419	-0.0303001	-0.0242029	-0.0305026	-0.0332186	0.00426063	-0.0192259	0.000862393	-0.0761761	-0.114567	-0.110178	-0.13769	-0.0293916	0.0612377	0.221312	0.356194	0.312678	0.236094	0.352089	0.397653	0.219713	0.186551	0.28228	0.278745	0.401884	0.293416	0.186818	0.172958	0.146214	0.0698115	0.107206	0.074461	0.0401451	0.0283838	-0.0122595	0.00209012	-0.00833523	-0.0406474	-0.0557324	-0.0425704	-0.0642528	-0.0661829	-0.113093	-0.118685	-0.0944524
295	-0.183094	-0.191225	-0.187532	-0.179541	-0.115899	-0.0650277	-0.0405492	-0.0397974	-0.0263498	0.027022	0.0113053	0.0470991	0.00488059	-0.0529685	-0.0482818	-0.0715245	0.0542818	0.180568	0.353516	0.490822	0.447977	0.379308	0.489595	0.488583	0.315969	0.286098	0.324074	0.289352	0.385144	0.288947	0.170811	0.145019	0.127085	0.0560983	0.0987202	0.0559798	0.0349594	0.029899	-0.001969	0.0221532	0.0296981	0.0264384	0.0265195	0.0490602	0.039134	0.0272629	-0.0214824	-0.0322092	-0.0201539
296	-0.171247	-0.191706	-0.187694	-0.205396	-0.172112	-0.129382	-0.0979461	-0.084394	-0.0647742	-0.00998865	-0.00595202	0.0521926	0.0358902	-0.00573982	0.0109393	-0.00829527	0.114623	0.200991	0.335614	0.452893	0.374732	0.315346	0.397856	0.371091	0.211166	0.196049	0.239661	0.178098	0.262601	0.166953	0.0606576	0.0481979	0.0337338	-0.0268353	0.00982511	-0.0277391	-0.0262416	-0.0256045	-0.0436008	-0.0166374	-0.00309006	0.0143649	0.0198656	0.0604612	0.0664823	0.0700924	0.0208939	-0.00401658	0.00359036
297	-0.144978	-0.165098	-0.168612	-0.19623	-0.203633	-0.17548	-0.161886	-0.147326	-0.144344	-0.0962807	-0.0796337	-0.0190921	-0.0581871	-0.0448075	-0.0208271	-0.035975	0.0666989	0.103975	0.211363	0.305356	0.216953	0.184997	0.297603	0.273145	0.109579	0.127757	0.207126	0.13948	0.222495	0.0868171	0.000485359	0.0204608	0.00705098	-0.0690561	-0.0506061	-0.0897305	-0.110339	-0.115405	-0.119705	-0.102362	-0.0916499	-0.0773582	-0.0909016	-0.0501948	-0.0434721	-0.0193146	-0.0807315	-0.120887	-0.100831
298	-0.117566	-0.142384	-0.151103	-0.177938	-0.207174	-0.186134	-0.178078	-0.176834	-0.181621	-0.1277	-0.110303	-0.0426865	-0.0500129	-0.0189893	-0.000545855	-0.00799904	0.0783673	0.114085	0.206951	0.286439	0.205439	0.199791	0.322329	0.275516	0.13858	0.193743	0.256234	0.174953	0.214984	0.0675811	-0.00914936	0.00912552	-0.0156534	-0.0877978	-0.0715464	-0.0978338	-0.133526	-0.146951	-0.155751	-0.131471	-0.122103	-0.0984537	-0.109611	-0.0604946	-0.0442132	-0.0163832	-0.0745772	-0.130207	-0.114397
299	-0.11956	-0.151297	-0.159682	-0.197828	-0.23153	-0.213122	-0.191591	-0.171991	-0.165684	-0.10349	-0.084411	-0.00239102	0.0496834	0.0689769	0.0860793	0.0836367	0.164908	0.190477	0.241328	0.319547	0.227978	0.226415	0.318476	0.228121	0.118084	0.175545	0.196098	0.105586	0.105345	-0.0151483	-0.0776135	-0.0672676	-0.0903782	-0.137796	-0.119456	-0.130714	-0.145126	-0.148549	-0.149381	-0.116711	-0.10176	-0.0491541	-0.032252	0.0308476	0.0740867	0.106159	0.0488944	-0.0138689	-0.00802966
300	-0.102596	-0.140476	-0.160505	-0.189507	-0.246408	-0.233492	-0.225734	-0.207137	-0.208164	-0.148235	-0.114949	-0.0391607	-0.00619036	0.0340934	0.0547113	0.0379413	0.10986	0.105082	0.141573	0.182828	0.103295	0.118627	0.220515	0.143395	0.0358033	0.104495	0.144079	0.0558015	0.064278	-0.064551	-0.111109	-0.0720512	-0.0916527	-0.141968	-0.14543	-0.143973	-0.180289	-0.19309	-0.186436	-0.162067	-0.14869	-0.103363	-0.103501	-0.0457063	-0.0075945	0.0356814	-0.0219195	-0.0890439	-0.082031
301	-0.0864386	-0.115841	-0.111722	-0.148085	-0.216517	-0.200911	-0.183967	-0.159982	-0.153291	-0.116199	-0.0891052	-0.0301083	-0.00527205	0.0617497	0.0856766	0.0973334	0.166781	0.115773	0.127266	0.175354	0.0682264	0.0701914	0.176178	0.101279	-0.00951584	0.0696993	0.142689	0.0416624	0.0363673	-0.0779031	-0.1207	-0.106855	-0.1308	-0.150652	-0.117327	-0.123355	-0.142322	-0.147244	-0.154104	-0.119033	-0.111699	-0.066662	-0.0575331	0.0067677	0.0391012	0.0672074	0.0287243	-0.0117774	-0.0147418
302	-0.0646698	-0.0926347	-0.0987694	-0.139789	-0.219929	-0.206181	-0.190199	-0.15231	-0.150731	-0.128584	-0.087296	-0.0321441	0.00661161	0.101718	0.123838	0.159186	0.181295	0.0941394	0.0673645	0.0681513	-0.0483825	-0.0182188	0.0777271	-0.0111229	-0.0885094	0.00786265	0.0663566	-0.0479733	-0.0683355	-0.160835	-0.184287	-0.166408	-0.170005	-0.172236	-0.139771	-0.155967	-0.165974	-0.160301	-0.154738	-0.118879	-0.101347	-0.0584718	-0.0466682	0.00243215	0.0415777	0.0717335	0.0474238	0.00982654	0.00339829
303	-0.0614197	-0.0705643	-0.062026	-0.0917225	-0.160036	-0.143786	-0.131255	-0.095844	-0.101953	-0.102919	-0.0757283	-0.0442667	-0.0072213	0.0833356	0.108054	0.160626	0.157322	0.0735213	0.0541168	0.0399426	-0.0647773	-0.0320622	0.0454355	-0.0250471	-0.0820062	0.0119758	0.0608	-0.0386794	-0.0672446	-0.129412	-0.150317	-0.142242	-0.152248	-0.139752	-0.0939982	-0.121494	-0.126263	-0.108438	-0.110423	-0.0821932	-0.0762788	-0.0441967	-0.0311936	-0.00483622	0.0217007	0.0407939	0.0326616	0.018478	0.00908612
304	-0.0618309	-0.0818023	-0.0900089	-0.121212	-0.192383	-0.173475	-0.150977	-0.114971	-0.114819	-0.113743	-0.0700307	-0.0323882	0.0109808	0.0960679	0.143147	0.187768	0.155507	0.100797	0.0758388	0.0498081	-0.0227711	0.0133553	0.0882032	0.018033	-0.0230542	0.0672334	0.0890574	-0.010708	-0.045445	-0.114962	-0.151626	-0.147218	-0.159248	-0.15568	-0.109072	-0.138171	-0.145482	-0.127697	-0.123843	-0.0874299	-0.064902	-0.0264847	-0.00647459	0.0210758	0.0593838	0.069332	0.0721122	0.0447636	0.0214334
305	-0.0680429	-0.0827649	-0.107351	-0.142806	-0.200019	-0.189132	-0.164554	-0.117181	-0.121803	-0.112455	-0.0589223	-0.00472549	0.0539178	0.15405	0.196867	0.243602	0.190302	0.118552	0.0743785	0.00952171	-0.0666898	-0.0072156	0.0489956	-0.0535372	-0.0732436	0.0261603	0.0202414	-0.0853114	-0.130483	-0.184578	-0.20927	-0.201449	-0.198416	-0.1845	-0.155041	-0.175989	-0.166575	-0.143974	-0.128497	-0.0818654	-0.0618826	-0.0147826	0.00811769	0.0322261	0.0805312	0.0934399	0.102887	0.0719486	0.0416333
306	-0.0769089	-0.0846624	-0.0960464	-0.136272	-0.184221	-0.17297	-0.150743	-0.0979456	-0.113466	-0.103393	-0.0629853	-0.00459313	0.0860463	0.184883	0.218018	0.269385	0.179386	0.120005	0.065495	-0.00922564	-0.0658422	0.027012	0.0601164	-0.0527549	-0.0360806	0.0790553	0.0455933	-0.0590349	-0.138694	-0.192151	-0.205549	-0.201395	-0.210487	-0.198147	-0.173112	-0.17653	-0.162659	-0.13612	-0.112374	-0.0618932	-0.0445988	0.00157098	0.0121417	0.024016	0.0879806	0.109176	0.124498	0.0829598	0.0543428
307	-0.0825956	-0.0897991	-0.0913601	-0.129344	-0.189566	-0.158113	-0.140247	-0.102805	-0.116607	-0.104448	-0.0763794	-0.0209527	0.0893361	0.173862	0.20426	0.256415	0.168133	0.141094	0.0924257	0.0373337	0.0143168	0.10731	0.122458	0.0219157	0.0492546	0.153107	0.0977324	0.00386423	-0.0822453	-0.125156	-0.140994	-0.148456	-0.162136	-0.155027	-0.130572	-0.128764	-0.136677	-0.125633	-0.106956	-0.0625533	-0.0474293	0.00669081	0.0212919	0.0353344	0.0992728	0.119202	0.127165	0.073402	0.0517392
308	-0.0712127	-0.0785713	-0.10644	-0.136153	-0.186958	-0.161551	-0.144967	-0.109327	-0.116872	-0.102783	-0.0712076	-0.0215261	0.0871082	0.167985	0.206381	0.261469	0.169254	0.16082	0.150857	0.0891888	0.0509904	0.128258	0.138048	0.0308661	0.049906	0.142077	0.0721002	-0.0141081	-0.0797752	-0.110607	-0.135403	-0.144963	-0.150179	-0.138977	-0.117378	-0.131708	-0.136317	-0.125715	-0.109037	-0.065652	-0.0454783	0.0017785	0.0201179	0.0272676	0.0827865	0.0966271	0.106477	0.0568906	0.0332587
309	-0.0753151	-0.0850052	-0.125042	-0.156458	-0.189766	-0.179311	-0.162047	-0.119788	-0.127867	-0.110721	-0.0818673	-0.0203996	0.116093	0.205682	0.236593	0.290725	0.169113	0.137033	0.110832	0.0322988	-0.0144173	0.0882391	0.0799144	-0.0540145	-0.00861407	0.107212	0.0210854	-0.0674371	-0.160337	-0.190422	-0.193111	-0.188569	-0.194105	-0.179405	-0.173983	-0.174601	-0.169912	-0.146095	-0.114049	-0.0740528	-0.0475148	-0.00606287	0.0118933	0.0120601	0.0833615	0.109816	0.124751	0.0674291	0.0401465
310	-0.0793015	-0.0894454	-0.118554	-0.151197	-0.191368	-0.169552	-0.157405	-0.114645	-0.130252	-0.114732	-0.107482	-0.0396337	0.117718	0.203353	0.230173	0.285519	0.155082	0.13191	0.0975268	0.027699	0.0147589	0.131199	0.106264	-0.0171185	0.0469843	0.162919	0.0568826	-0.0280279	-0.132701	-0.161313	-0.161315	-0.151551	-0.161176	-0.156032	-0.165223	-0.151786	-0.164624	-0.140915	-0.111932	-0.0818184	-0.0589311	-0.00926048	0.00383724	0.00354228	0.0743523	0.106605	0.119205	0.0489304	0.028592
311	-0.0813529	-0.0938448	-0.116603	-0.129732	-0.144707	-0.123936	-0.109292	-0.0860566	-0.0891997	-0.0656539	-0.0745549	-0.014033	0.125829	0.161161	0.171118	0.216076	0.0949157	0.160365	0.200584	0.156846	0.160021	0.251218	0.217471	0.11496	0.166023	0.251447	0.139015	0.0590203	-0.0187451	-0.0399805	-0.0493814	-0.0570163	-0.0817955	-0.0827259	-0.0840606	-0.0704435	-0.0991821	-0.0865327	-0.0700826	-0.0319657	-0.0132161	0.0260603	0.0473419	0.039107	0.0959304	0.114497	0.11778	0.0513809	0.0418351
312	-0.0752964	-0.0864743	-0.119648	-0.140506	-0.159767	-0.141386	-0.122945	-0.0882521	-0.0895374	-0.0669694	-0.0623211	0.00974961	0.172837	0.220515	0.222864	0.271963	0.130174	0.172869	0.20496	0.156634	0.129914	0.198474	0.159889	0.0471105	0.091496	0.166768	0.0646511	-0.00880502	-0.0847671	-0.101581	-0.108131	-0.119653	-0.142802	-0.130771	-0.123808	-0.109969	-0.116656	-0.0939266	-0.0655481	-0.0276621	-0.00808082	0.0344811	0.0630323	0.0625755	0.123525	0.137563	0.145374	0.0876282	0.0731235
313	-0.0342388	-0.0536342	-0.0859789	-0.100437	-0.1285	-0.119672	-0.103726	-0.0620519	-0.0935842	-0.072883	-0.0741201	-0.00125235	0.18041	0.23955	0.228947	0.281538	0.117756	0.126844	0.121318	0.0565833	0.0421246	0.126668	0.0846703	-0.0231196	0.0446339	0.126729	0.0204005	-0.0474146	-0.143903	-0.158621	-0.149313	-0.140287	-0.158058	-0.150567	-0.166656	-0.133587	-0.126003	-0.0960771	-0.0665746	-0.0348609	-0.0276521	0.0230262	0.0422581	0.0326951	0.106534	0.135837	0.158192	0.0905716	0.0749299
314	-0.0232944	-0.0424083	-0.0871187	-0.0716797	-0.0910377	-0.0846558	-0.0714207	-0.0347518	-0.061553	-0.0272751	-0.0474011	0.00686374	0.15517	0.171031	0.134872	0.182748	0.0407245	0.11833	0.167115	0.121781	0.140392	0.217753	0.170559	0.080627	0.142919	0.206954	0.0943176	0.0319398	-0.0490013	-0.0623871	-0.0591335	-0.0432782	-0.0675872	-0.0805282	-0.109343	-0.065668	-0.0825828	-0.064229	-0.0386116	-0.00666471	-0.0080066	0.0345547	0.06027	0.0449816	0.108613	0.127577	0.140618	0.0765059	0.0643342
315	0.0333459	0.0107896	-0.0327753	-0.0165529	-0.0597685	-0.0615065	-0.0344872	0.00738518	-0.0181366	0.0143937	0.00193653	0.0336604	0.1666	0.188628	0.16327	0.210428	0.0614328	0.131642	0.157077	0.0947309	0.12409	0.177603	0.135335	0.0607933	0.120759	0.163357	0.0674431	0.0175592	-0.0564043	-0.0680265	-0.0613747	-0.0525226	-0.0739153	-0.0871657	-0.113465	-0.0575426	-0.0498695	-0.0271511	0.00427529	0.0338621	0.0247601	0.0679315	0.0827671	0.0629548	0.119525	0.132812	0.155228	0.100979	0.0877998
316	0.0240885	0.00899358	-0.0188527	0.0111888	-0.0185558	-0.0209825	0.0140704	0.0445114	0.0275159	0.0695918	0.0530417	0.0758917	0.191601	0.181616	0.137442	0.173582	0.0465621	0.159494	0.220011	0.155351	0.189287	0.247376	0.203194	0.124929	0.173959	0.220025	0.114493	0.0680999	0.000135051	-0.0146146	-0.0073207	-0.00657866	-0.0322133	-0.0462964	-0.0661619	-0.00673878	0.00214261	0.018141	0.0435422	0.0825056	0.0720562	0.107551	0.117433	0.0907905	0.136384	0.140648	0.162966	0.118858	0.11179
317	0.04997	0.0483884	-0.000245858	0.0250486	0.0182202	0.0266729	0.0754418	0.114519	0.129268	0.188272	0.182272	0.166684	0.182298	0.115565	0.0847336	0.132869	0.0760309	0.206554	0.316364	0.239865	0.271901	0.324575	0.281653	0.177627	0.167883	0.19955	0.103907	0.073206	0.0528805	0.0484878	0.0408477	0.0370773	-0.00166987	-0.0109852	-0.0120123	0.067414	0.0865739	0.10907	0.144043	0.180635	0.159266	0.197776	0.206537	0.166852	0.18437	0.150559	0.175005	0.166427	0.16331
318	0.0164376	0.00447894	-0.021639	-0.0347015	-0.101903	-0.0941196	-0.048001	0.0124067	-0.00677827	0.0366823	0.0479474	0.114196	0.299426	0.392831	0.375965	0.445231	0.281264	0.263171	0.197639	0.100027	0.111974	0.20808	0.137313	0.0374996	0.105095	0.152683	0.0349287	-0.0118037	-0.0962769	-0.119533	-0.120085	-0.106052	-0.136687	-0.144812	-0.163024	-0.101293	-0.07197	-0.027019	0.0190884	0.0709727	0.0672315	0.140745	0.129357	0.102726	0.178561	0.190274	0.200704	0.152022	0.144515
319	0.0327803	0.0215037	-0.0166862	-0.0254844	-0.0966616	-0.105988	-0.0681061	-0.00128558	-0.0356809	-0.00941313	-0.00307505	0.0498531	0.212796	0.305309	0.323861	0.395637	0.235455	0.180169	0.0817382	-0.00622662	0.0089819	0.0779721	0.0209037	-0.0694098	0.00376712	0.0494814	-0.0484214	-0.0958186	-0.177427	-0.185643	-0.172348	-0.152788	-0.165478	-0.166011	-0.19477	-0.142475	-0.11066	-0.059443	-0.0181289	0.0171843	0.012596	0.0857787	0.0807219	0.0622834	0.131369	0.152472	0.175	0.125936	0.116158
320	0.00236809	0.00101271	-0.0210027	-0.0731101	-0.163644	-0.178024	-0.144239	-0.0633744	-0.100154	-0.081195	-0.0496522	0.0255819	0.218767	0.364732	0.44105	0.516467	0.355353	0.199599	0.0040703	-0.092995	-0.11244	-0.0295411	-0.0774643	-0.181225	-0.0997398	-0.039108	-0.127896	-0.176122	-0.275947	-0.292143	-0.278063	-0.254062	-0.253009	-0.239768	-0.264792	-0.238732	-0.197171	-0.132197	-0.0788847	-0.0468703	-0.0322916	0.0474536	0.0342395	0.0252973	0.112915	0.151117	0.164003	0.108067	0.102138
321	0.0193058	0.0201937	-0.00454874	-0.0462054	-0.117964	-0.136886	-0.0948072	-0.00852255	-0.0366634	-0.0307711	0.00727983	0.0448202	0.199619	0.325714	0.400874	0.461012	0.298999	0.158745	-0.0225012	-0.121559	-0.136928	-0.0731699	-0.11697	-0.210757	-0.137066	-0.0793036	-0.16074	-0.20389	-0.291298	-0.287103	-0.266369	-0.250677	-0.248326	-0.227246	-0.244517	-0.199635	-0.142942	-0.0760007	-0.0197367	-0.00863477	0.0140657	0.0825935	0.0730626	0.058524	0.132838	0.15624	0.183845	0.140481	0.137987
322	-0.000231894	-0.00408692	-0.0433893	-0.077599	-0.144995	-0.15967	-0.12226	-0.0520042	-0.0782583	-0.0768457	-0.0393039	0.000694092	0.160261	0.264043	0.356694	0.417652	0.279161	0.144305	-0.0330312	-0.127241	-0.141319	-0.0850287	-0.130937	-0.222689	-0.144939	-0.0818027	-0.163655	-0.208499	-0.305214	-0.281589	-0.26078	-0.256045	-0.251599	-0.218489	-0.229002	-0.201041	-0.167646	-0.116287	-0.068143	-0.0582964	-0.0273559	0.0382208	0.0392915	0.0418407	0.11497	0.138955	0.166805	0.11738	0.0989642
323	0.00152969	0.00341539	-0.0431625	-0.0900246	-0.171878	-0.190287	-0.157448	-0.0757844	-0.106473	-0.123974	-0.0848989	-0.038188	0.115415	0.234928	0.347502	0.405664	0.29747	0.10343	-0.117522	-0.197332	-0.219271	-0.174806	-0.20688	-0.297014	-0.228708	-0.165907	-0.225369	-0.266639	-0.357841	-0.333021	-0.305783	-0.297871	-0.272442	-0.226481	-0.239571	-0.238111	-0.211215	-0.14693	-0.0985244	-0.103445	-0.0729611	-0.00866909	-0.00469459	0.00739476	0.0828136	0.115491	0.139463	0.0938311	0.0750268
324	0.0129314	0.0155108	-0.0293441	-0.0747367	-0.165273	-0.189304	-0.153501	-0.0641433	-0.098093	-0.114759	-0.0779115	-0.0264271	0.137764	0.285177	0.374502	0.426339	0.296653	0.0944567	-0.125819	-0.20339	-0.228111	-0.175863	-0.208088	-0.302645	-0.233767	-0.173629	-0.230352	-0.270127	-0.362159	-0.349498	-0.320035	-0.303857	-0.276938	-0.234362	-0.25951	-0.249065	-0.214332	-0.13953	-0.090332	-0.0891418	-0.0623112	0.00412971	0.00168502	0.00852337	0.0857652	0.119935	0.138182	0.0964649	0.0860202
325	-0.0283986	-0.0191133	-0.0523626	-0.0973477	-0.181566	-0.198447	-0.167171	-0.0831422	-0.107146	-0.113468	-0.0652819	-0.010516	0.152586	0.297747	0.404801	0.455799	0.330909	0.131284	-0.0922664	-0.188146	-0.21596	-0.147943	-0.182372	-0.282162	-0.206924	-0.139714	-0.1991	-0.243191	-0.350505	-0.338245	-0.313793	-0.308791	-0.289076	-0.240295	-0.251814	-0.249473	-0.214611	-0.151105	-0.104124	-0.0851052	-0.0455791	0.0145489	0.0109606	0.0198368	0.0934651	0.121078	0.134469	0.0974823	0.0811588
326	-0.0321904	-0.02391	-0.0699311	-0.107789	-0.171856	-0.185999	-0.154278	-0.0757075	-0.103703	-0.112275	-0.0615253	-0.016721	0.130699	0.247638	0.36093	0.409428	0.302932	0.111034	-0.110816	-0.204772	-0.22412	-0.16173	-0.204919	-0.300927	-0.215708	-0.155791	-0.217917	-0.252776	-0.362289	-0.329956	-0.295741	-0.292194	-0.275229	-0.218827	-0.229392	-0.223208	-0.197163	-0.146256	-0.0985852	-0.0846557	-0.0407685	0.0111738	0.0100642	0.0225377	0.0915345	0.114751	0.140629	0.104909	0.0762362
327	-0.014672	-0.0137896	-0.0545048	-0.0927169	-0.153414	-0.163843	-0.12901	-0.0547179	-0.0776097	-0.090214	-0.0362785	-0.0117464	0.110222	0.217252	0.301778	0.355056	0.252079	0.0811314	-0.129685	-0.221811	-0.234625	-0.173338	-0.2109	-0.296985	-0.214414	-0.151889	-0.203083	-0.235982	-0.338502	-0.314531	-0.282715	-0.282197	-0.269265	-0.212866	-0.214637	-0.201213	-0.167803	-0.124627	-0.0805413	-0.0627721	-0.0165468	0.0274949	0.0271028	0.0386169	0.102481	0.119497	0.153882	0.121853	0.0919232
328	-0.0221136	-0.0184848	-0.0408864	-0.0685681	-0.105628	-0.11178	-0.0726095	-0.0186766	-0.0270907	-0.0298364	0.0187483	0.0232055	0.111597	0.205486	0.26898	0.310766	0.210069	0.0862015	-0.0847761	-0.182577	-0.184444	-0.118624	-0.154245	-0.229047	-0.162053	-0.106975	-0.148026	-0.177193	-0.265808	-0.244008	-0.220882	-0.227652	-0.228667	-0.179972	-0.170167	-0.142175	-0.100231	-0.0728016	-0.0487179	-0.0117808	0.034117	0.0673542	0.0585207	0.0578669	0.103957	0.104332	0.140383	0.12254	0.0975765
329	-0.024519	-0.013442	-0.0291653	-0.0568329	-0.0914419	-0.0989542	-0.055192	-0.00992124	-0.0136324	-0.0109473	0.0386603	0.041147	0.119026	0.21433	0.28745	0.324366	0.235449	0.0984555	-0.0757259	-0.180507	-0.182537	-0.118488	-0.156969	-0.228385	-0.162175	-0.116993	-0.160019	-0.182891	-0.267776	-0.241593	-0.221767	-0.24129	-0.241689	-0.184392	-0.166764	-0.1289	-0.0807616	-0.0577409	-0.0463912	-0.000860767	0.0433732	0.0773174	0.063322	0.0603851	0.100687	0.0959786	0.130892	0.1227	0.101386
330	-0.0116872	2.51927e-05	-0.0125824	-0.0479475	-0.0946003	-0.102103	-0.0527536	0.00600546	0.00414911	-0.00196428	0.0620018	0.0490228	0.108875	0.203781	0.266399	0.313278	0.227279	0.0801112	-0.106361	-0.217509	-0.216802	-0.154053	-0.186371	-0.258355	-0.189592	-0.139366	-0.177599	-0.195299	-0.284742	-0.26565	-0.243704	-0.266677	-0.261884	-0.199209	-0.176248	-0.134512	-0.0764511	-0.0473514	-0.0271761	0.0137292	0.0602951	0.0899781	0.0818478	0.0774251	0.123128	0.11838	0.159227	0.153517	0.132774
331	-0.00146875	0.00815012	0.00771042	-0.0180672	-0.0402093	-0.0384886	0.00829977	0.0425326	0.05254	0.0513643	0.108832	0.0670317	0.0757421	0.150534	0.176807	0.218322	0.14397	0.0465956	-0.0861886	-0.192267	-0.180853	-0.124055	-0.148247	-0.197181	-0.142151	-0.100568	-0.12449	-0.133074	-0.201291	-0.187775	-0.173842	-0.206753	-0.209612	-0.154061	-0.117645	-0.0670667	-0.00837606	0.00523899	0.0124859	0.0561862	0.0994179	0.112823	0.100748	0.0857942	0.108756	0.0898743	0.133823	0.143635	0.127622
332	0.00159053	0.00484035	-0.00584342	-0.0358847	-0.0621105	-0.0618018	-0.0270128	0.0146967	0.0169248	0.00702756	0.0734174	0.0389674	0.0628851	0.135385	0.163091	0.210042	0.132738	0.0289654	-0.116049	-0.217883	-0.208439	-0.149149	-0.17396	-0.231939	-0.165079	-0.109979	-0.138039	-0.152761	-0.228666	-0.217717	-0.197698	-0.218962	-0.216137	-0.15581	-0.126728	-0.0948857	-0.0425163	-0.026144	-0.00719955	0.0221974	0.0705742	0.0830728	0.0820136	0.069775	0.102108	0.0947484	0.13838	0.133972	0.115652
333	-0.00292984	0.00190139	-0.00717144	-0.0201946	0.00332086	-0.000596405	0.0108908	-0.00256757	0.0212953	0.0166514	0.060768	0.0118369	-0.0184858	-0.0206316	-0.045323	-0.0126941	-0.0428431	-0.0444228	-0.0775532	-0.134151	-0.116218	-0.0743212	-0.0918797	-0.116017	-0.0779963	-0.0429872	-0.0504033	-0.0552389	-0.0915801	-0.0867593	-0.0723916	-0.0845198	-0.0858833	-0.0516579	-0.0324855	-0.0184392	0.000595629	-0.010963	-0.0117711	0.00402182	0.053098	0.0350228	0.0563708	0.0498272	0.047927	0.0225026	0.0505539	0.0507918	0.0356363
334	-0.0432914	-0.0460771	-0.0625891	-0.0728653	-0.0233067	-0.0197486	-0.019166	-0.030043	-0.00443028	-0.0146445	0.0138482	-0.0174996	-0.0309957	-0.0774099	-0.104807	-0.0771032	-0.0834838	-0.0444855	-0.062821	-0.0816975	-0.0618064	-0.0533221	-0.073563	-0.0773712	-0.0499347	-0.0373322	-0.0466179	-0.0487933	-0.0692202	-0.0567441	-0.0523079	-0.0528173	-0.0510643	-0.023054	0.000533358	-0.0213082	-0.0223395	-0.0390145	-0.0176056	-0.031202	0.0274575	0.00682757	0.039123	0.0428422	0.0521691	0.0368619	0.0516768	0.0425791	0.0257122
335	-0.0486805	-0.0518204	-0.0524166	-0.0570003	-0.0104805	-0.0172126	-0.0366312	-0.0665314	-0.0386273	-0.0504509	-0.0265022	-0.0491639	-0.104628	-0.178763	-0.186397	-0.174653	-0.136834	-0.10031	-0.0881937	-0.0760936	-0.0676807	-0.0934013	-0.0943699	-0.0583818	-0.0577759	-0.0733541	-0.0588303	-0.0434245	-0.0276739	-0.0148385	-0.0109321	-0.0108439	-0.00336439	0.00915293	0.0277153	-0.00478699	-0.0265137	-0.0649719	-0.0545189	-0.0760493	-0.0219786	-0.0608435	-0.0341265	-0.0305432	-0.039719	-0.0521936	-0.051642	-0.0374223	-0.0498835
336	-0.0447542	-0.0482443	-0.0255416	-0.00767801	0.0301132	0.0114536	-0.0274499	-0.0899354	-0.0720177	-0.0865437	-0.0698039	-0.076743	-0.15733	-0.218159	-0.206766	-0.217398	-0.167189	-0.137201	-0.104397	-0.086743	-0.0792724	-0.114908	-0.104494	-0.0423816	-0.0486457	-0.0757193	-0.0432999	-0.0237651	0.00509687	0.0139177	0.018588	0.0155718	0.0216158	0.0303677	0.0488279	0.0191378	-0.0186912	-0.0757843	-0.0868185	-0.1197	-0.0811639	-0.125112	-0.110134	-0.103016	-0.129805	-0.134165	-0.139693	-0.1245	-0.132288
337	0.00841606	0.0134622	0.0418514	0.0682771	0.10612	0.0701637	0.0120832	-0.0521906	-0.0542173	-0.095002	-0.110141	-0.120215	-0.174648	-0.218449	-0.219086	-0.242618	-0.213764	-0.177528	-0.12739	-0.0946953	-0.0761925	-0.116707	-0.106036	-0.0243913	-0.0206447	-0.0631445	-0.0305109	0.00387335	0.0287671	0.0466947	0.0564646	0.0544169	0.0620803	0.0746006	0.0644253	0.0377444	-0.000846734	-0.0329958	-0.0467265	-0.105489	-0.0925994	-0.152941	-0.149435	-0.151162	-0.18228	-0.178252	-0.171914	-0.158659	-0.158865
338	0.0441604	0.0402676	0.0153164	-0.000834706	0.030787	0.0237907	0.00675174	-0.00715026	-0.0285715	-0.0553715	-0.111972	-0.107977	-0.0853495	-0.134871	-0.147623	-0.150031	-0.133204	-0.08133	-0.017983	0.030489	0.0512416	0.0195633	0.0179482	0.0536448	0.0304303	-0.0022832	-0.00691185	0.000798077	0.0341513	0.0551432	0.0346779	0.057441	0.0740117	0.0501604	0.0370367	-0.00456657	-0.00779723	0.00337334	-0.0218118	-0.0677122	-0.0830298	-0.110263	-0.090555	-0.0772792	-0.0896355	-0.0861635	-0.0792013	-0.0765866	-0.0795287
339	0.0322925	0.0348856	0.0368935	0.0354359	0.104722	0.0953525	0.0764072	0.0335638	0.0349873	0.00349371	-0.0342609	-0.0812623	-0.122362	-0.209551	-0.234302	-0.232764	-0.206304	-0.132915	-0.0574993	-0.0258718	0.0119748	-0.0309204	-0.0256965	0.0406625	0.0206726	-0.0169348	-0.00960677	0.014764	0.0600845	0.0910408	0.0801504	0.089792	0.1086	0.103248	0.102731	0.0599933	0.0555754	0.0528286	0.027962	-0.0123266	-0.0128677	-0.0684989	-0.0462146	-0.058146	-0.0910645	-0.106344	-0.0859403	-0.0593015	-0.0631546
340	-0.0116563	0.00163956	-0.00276748	-0.0122321	0.0429391	0.0291423	0.0314844	0.0154563	0.0234765	0.00360753	0.00844495	-0.0303853	-0.0884941	-0.1402	-0.172488	-0.172584	-0.160281	-0.118681	-0.0859183	-0.0746511	-0.0479078	-0.0807711	-0.0770734	-0.0248794	-0.040298	-0.0620621	-0.042697	-0.0176981	0.0108988	0.0260783	0.0303497	0.0262263	0.0491732	0.0471358	0.0496026	0.0275668	0.0169078	0.000613629	-0.000773547	-0.00487912	0.0093508	-0.0323045	-0.0194042	-0.025744	-0.0382942	-0.0482112	-0.0272277	-0.00645207	-0.0140561
341	0.027884	0.0427609	0.0427887	0.040787	0.053528	0.0283924	0.0252323	0.00944645	0.020807	0.0081716	0.0301524	0.0133373	-0.0292438	-0.0640091	-0.0592277	-0.0509457	-0.0488426	-0.0501509	-0.0689372	-0.0887488	-0.0712641	-0.093176	-0.0965593	-0.0770942	-0.0682627	-0.081411	-0.0836837	-0.0619986	-0.0616556	-0.0283921	-0.0296903	-0.0623437	-0.028837	-0.0105144	-0.00548526	-0.00974355	0.00932123	-0.000120074	-0.00716677	0.00748115	0.0129388	-0.00284883	0.00982854	0.0127358	-0.000259028	-0.0234575	0.00760925	0.0355672	0.0166461
342	0.0246819	0.0352555	0.0490521	0.0735357	0.0979186	0.0696294	0.0674745	0.0266715	0.0491656	0.0443298	0.073279	0.035279	-0.047476	-0.0794416	-0.0967751	-0.0928335	-0.066898	-0.0567605	-0.0441788	-0.0751905	-0.052561	-0.0704756	-0.071343	-0.0537359	-0.0382759	-0.0473842	-0.05401	-0.0225883	-0.0128269	0.0109584	0.0123083	-0.0184273	0.0137657	0.0284504	0.0264972	0.0264637	0.0482049	0.0311244	0.0108658	0.0216842	0.0232197	-0.00335981	0.0163581	0.00995648	-0.0227542	-0.0521431	-0.0207708	0.0123613	-0.00692086
343	-0.000209269	0.0114773	0.0426748	0.0742337	0.0722884	0.0606082	0.0739803	0.0611877	0.0739786	0.0811568	0.113864	0.0916733	0.0245453	-0.0297409	-0.0538784	-0.0302785	-0.00445779	0.0182935	0.0012136	-0.060984	-0.0439835	-0.0414406	-0.0490118	-0.0449249	-0.0183805	-0.0353714	-0.0626112	-0.0358868	-0.0383618	-0.00677383	-0.0133165	-0.0427406	-0.0249814	-5.42322e-05	0.0100043	0.0119601	0.0640959	0.0549882	0.0415749	0.0825664	0.0885255	0.0819908	0.0652602	0.0393089	0.0260715	0.000862152	0.0331705	0.053495	0.0504912
344	-0.00344486	0.00213945	0.0304393	0.0506718	0.07311	0.0672689	0.0826531	0.0606318	0.0894791	0.0936816	0.136753	0.107242	0.0214316	-0.0281344	-0.0438499	-0.0264917	0.00748881	0.0278954	0.014575	-0.0395894	-0.0191556	-0.0372693	-0.0361026	-0.0165305	-0.00338905	-0.0290014	-0.0397679	-0.0119224	-0.000929086	0.0299299	0.0203077	-0.00936038	-0.000412597	0.0219925	0.0382448	0.0388798	0.0787152	0.0662615	0.0572286	0.0958522	0.110215	0.106955	0.0961798	0.0726058	0.0525149	0.0161494	0.046881	0.0754933	0.0665123
345	-0.013633	-0.0140115	-0.00294873	-0.0159936	-0.0159147	-0.0188878	5.43408e-05	0.0126052	0.0390298	0.0477557	0.0962552	0.0753854	0.0524053	0.043985	0.0625292	0.0780294	0.0700561	0.0689673	0.0180734	-0.0345539	-0.0193751	-0.0321056	-0.0253886	-0.0236109	-0.0121486	-0.0221449	-0.0472756	-0.0388912	-0.0350981	-0.0226845	-0.0359324	-0.0294135	-0.0222035	-0.0271743	-0.035918	-0.0367643	-0.0119734	-0.00356792	0.0348407	0.0597614	0.0916613	0.107888	0.0922652	0.0681382	0.0828296	0.0703085	0.0847413	0.0842861	0.0832977
346	-0.0231185	-0.0281812	-0.02052	-0.0499833	-0.0725087	-0.0755011	-0.0705745	-0.028246	-0.0295632	-0.0453622	-0.0174146	-0.0125209	0.0349096	0.0654901	0.102299	0.106116	0.0649334	0.0343102	-0.0235593	-0.050008	-0.0479465	-0.0663486	-0.0541318	-0.0617804	-0.063105	-0.0525957	-0.0756867	-0.0882795	-0.0893543	-0.0844697	-0.0971675	-0.0729335	-0.037733	-0.0479121	-0.0735659	-0.103705	-0.0826656	-0.0473668	-0.00198175	-0.010575	0.00631311	0.0389745	0.0223626	0.00332203	0.030703	0.0405202	0.0549599	0.0431494	0.0396033
347	-0.0400342	-0.0462123	-0.0226613	-0.034658	-0.0477094	-0.0351127	-0.0408871	-0.0452347	-0.0498015	-0.056193	-0.0193004	0.00769511	0.0262497	0.0698595	0.103519	0.102394	0.0915988	0.0349776	-0.0253528	-0.0445768	-0.0613014	-0.0874857	-0.0674237	-0.0693073	-0.0816429	-0.0798122	-0.0786966	-0.0810773	-0.0813574	-0.063689	-0.0956856	-0.136118	-0.0943973	-0.0606819	-0.036022	-0.0707659	-0.0238723	-0.0158697	-0.0497998	-0.0299835	-0.0123708	0.0171135	-0.00675759	-0.0160675	-0.0174769	-0.0205894	0.000188301	0.0166196	0.00796739
348	-0.0538522	-0.0861034	-0.0854713	-0.113644	-0.189922	-0.18827	-0.195381	-0.157686	-0.182055	-0.152608	-0.0952145	-0.000773856	0.107674	0.224306	0.254413	0.252065	0.199337	0.09263	-0.0488304	-0.075815	-0.110742	-0.0932096	-0.0846596	-0.123965	-0.0933735	-0.0674949	-0.0864258	-0.114714	-0.162892	-0.190519	-0.20965	-0.208727	-0.178825	-0.172642	-0.201215	-0.225062	-0.19936	-0.174672	-0.15393	-0.116472	-0.0910446	-0.0271223	-0.048794	-0.0321048	0.0180072	0.0620805	0.0447576	0.00084902	-0.00517472
349	-0.10096	-0.129472	-0.150624	-0.182401	-0.235372	-0.234523	-0.244668	-0.20398	-0.206718	-0.153416	-0.115052	0.00782463	0.114217	0.156127	0.142998	0.105405	0.107145	0.0857239	0.0700568	0.0945399	0.0606043	0.058252	0.077583	0.0331305	0.0266006	0.0349687	0.00243508	-0.0231097	-0.0517807	-0.108607	-0.121365	-0.100378	-0.0865009	-0.101938	-0.150529	-0.177435	-0.229379	-0.214497	-0.161912	-0.155255	-0.108691	-0.0534539	-0.0638113	-0.0324185	0.031507	0.0912428	0.0267122	-0.0538374	-0.0440885
350	-0.167167	-0.200673	-0.226855	-0.258294	-0.253669	-0.235048	-0.234798	-0.212875	-0.184567	-0.10381	-0.0536818	0.0601396	0.0876847	0.0745595	0.0686947	-0.00245322	0.0656076	0.0922987	0.11592	0.189965	0.16065	0.126823	0.150752	0.133328	0.0879679	0.0539635	0.0569201	0.0470892	0.0571792	-0.0132436	-0.0571404	-0.0477923	-0.0545084	-0.0899196	-0.101705	-0.132957	-0.182652	-0.193234	-0.158515	-0.121421	-0.061976	-0.0114229	0.0101683	0.0686692	0.124788	0.162021	0.0819121	0.012087	0.0139628
351	-0.171511	-0.207485	-0.234009	-0.26385	-0.250814	-0.223023	-0.2087	-0.174829	-0.139386	-0.0491257	-0.0154762	0.0742389	0.0795298	0.0405784	0.0432829	-0.00837267	0.101033	0.139968	0.183918	0.282978	0.228073	0.180904	0.227186	0.178925	0.0775707	0.057704	0.0804456	0.0574741	0.0880584	-4.18938e-05	-0.0644096	-0.0554964	-0.0742594	-0.119005	-0.104617	-0.110624	-0.135494	-0.143047	-0.117806	-0.0884885	-0.0441629	0.00976921	0.0345952	0.105	0.153602	0.184361	0.110203	0.0452171	0.0525761
352	-0.192329	-0.226105	-0.257142	-0.288956	-0.260995	-0.228987	-0.217303	-0.18599	-0.149508	-0.0691313	-0.0307581	0.0660771	0.0568523	0.0219689	0.020724	-0.0463931	0.0471242	0.0904594	0.135238	0.234036	0.197665	0.15299	0.194297	0.171363	0.0801833	0.049442	0.0724442	0.0579906	0.0972025	0.0142309	-0.0508482	-0.0382147	-0.0477469	-0.101126	-0.0930918	-0.112938	-0.14667	-0.157003	-0.129813	-0.105288	-0.0471221	-0.00415994	0.0195605	0.0862702	0.132913	0.163749	0.0874555	0.0219445	0.0313953
353	-0.184256	-0.211766	-0.238139	-0.269102	-0.237034	-0.205295	-0.205113	-0.18844	-0.165467	-0.100261	-0.0586707	0.0437842	0.045808	0.0188286	0.019392	-0.057337	0.00598289	0.041778	0.0630659	0.154698	0.140571	0.100733	0.119861	0.124235	0.0739607	0.0271411	0.0358744	0.0379246	0.0700882	0.0209452	-0.0211101	-0.013411	-0.0171878	-0.0573125	-0.0683966	-0.100574	-0.15334	-0.169162	-0.138056	-0.124373	-0.0623034	-0.0189195	-0.00702666	0.0536084	0.101611	0.130173	0.0604279	-0.00631355	-0.00410404
354	-0.159207	-0.175349	-0.215393	-0.240332	-0.217651	-0.198022	-0.212452	-0.197788	-0.187189	-0.128857	-0.0841396	0.0154451	0.0322558	0.0320961	0.0331947	-0.0453926	-0.0361154	-0.0123749	0.00633549	0.0724726	0.0655366	0.0398892	0.0511561	0.0686634	0.0563168	0.0161734	0.0153955	0.0115286	0.0351591	-0.00304294	-0.0197002	0.00722815	0.0051864	-0.0346082	-0.0774653	-0.106817	-0.179538	-0.196463	-0.152728	-0.140517	-0.0791293	-0.0507451	-0.0360299	0.00792146	0.052575	0.0786994	0.0192574	-0.0371994	-0.0422788
355	-0.128247	-0.146033	-0.194538	-0.224446	-0.218389	-0.20446	-0.210458	-0.185958	-0.176207	-0.108518	-0.0696036	0.0175537	0.0387796	0.037155	0.0630181	0.00845893	0.0340212	0.0320264	0.0346822	0.0841553	0.054219	0.035097	0.0533362	0.0505081	0.0208726	0.000423568	0.00134767	-0.0153826	0.00775264	-0.0464268	-0.0674813	-0.0245763	-0.0337581	-0.0868339	-0.125399	-0.125913	-0.175979	-0.189991	-0.147892	-0.127413	-0.080682	-0.0495391	-0.0348791	0.00466946	0.0491014	0.0777398	0.0186162	-0.0355111	-0.0338789
356	-0.186659	-0.205333	-0.234802	-0.255716	-0.2463	-0.221465	-0.22698	-0.192781	-0.169157	-0.0827144	-0.0424975	0.0531014	0.0844425	0.0675524	0.108122	0.0606074	0.110346	0.108847	0.101179	0.165293	0.119256	0.0881199	0.105728	0.0824358	0.0454779	0.0241433	0.0194175	-0.0027702	0.0157261	-0.0388032	-0.0673707	-0.0375636	-0.0487679	-0.0967378	-0.12821	-0.131077	-0.178235	-0.191849	-0.140947	-0.112113	-0.0644978	-0.0217256	-0.00150442	0.0457641	0.10428	0.139105	0.0671852	0.00563629	0.013976
357	-0.214012	-0.230384	-0.244954	-0.274395	-0.267769	-0.236614	-0.220727	-0.174091	-0.147143	-0.0528291	-0.0189075	0.0710306	0.104116	0.0932772	0.15206	0.114478	0.185721	0.182001	0.168124	0.236155	0.167694	0.131406	0.155022	0.115275	0.0522959	0.038053	0.0332881	0.00597868	0.0328053	-0.0288482	-0.0709485	-0.0464101	-0.0595109	-0.119268	-0.141579	-0.134501	-0.165944	-0.16742	-0.121441	-0.0893187	-0.04933	-0.0117935	0.0137996	0.0622573	0.116817	0.152219	0.0734351	0.0160578	0.0349954
358	-0.191248	-0.207178	-0.21931	-0.240655	-0.265646	-0.251045	-0.254089	-0.209981	-0.207711	-0.131144	-0.10306	-0.00674639	0.0571381	0.0937585	0.150861	0.115794	0.149459	0.113016	0.0848746	0.117803	0.0523057	0.0367288	0.0526519	0.0151498	-0.0226841	-0.0223859	-0.0280178	-0.0592221	-0.0469096	-0.11228	-0.129203	-0.080348	-0.0836391	-0.141652	-0.194943	-0.182352	-0.223037	-0.222879	-0.172045	-0.159207	-0.133377	-0.101872	-0.0924854	-0.050332	0.00342045	0.0639478	-0.00884574	-0.0746377	-0.0531372
359	-0.162235	-0.172	-0.181632	-0.210633	-0.25405	-0.247704	-0.246495	-0.185719	-0.184879	-0.116128	-0.069486	0.0202388	0.0849053	0.147781	0.220217	0.220731	0.244198	0.149434	0.0369427	0.0270163	-0.0362498	-0.0323942	-0.0291137	-0.0726375	-0.0812732	-0.0707426	-0.0867154	-0.120567	-0.130395	-0.178996	-0.187234	-0.139696	-0.14008	-0.177487	-0.221094	-0.201039	-0.228165	-0.220065	-0.166011	-0.142231	-0.109626	-0.0690444	-0.0713043	-0.0392323	0.0266442	0.0901598	0.033906	-0.0254778	-0.00781841
360	-0.155377	-0.169516	-0.187637	-0.201403	-0.248048	-0.252824	-0.255053	-0.210163	-0.222766	-0.15596	-0.111896	-0.013768	0.0652126	0.129071	0.201045	0.203845	0.199279	0.13178	0.0356976	0.0244927	-0.0369886	-0.023055	-0.0209238	-0.073156	-0.0745545	-0.0514101	-0.0771232	-0.111057	-0.137622	-0.188101	-0.179444	-0.128439	-0.131543	-0.164241	-0.225228	-0.197931	-0.242225	-0.241381	-0.185339	-0.170919	-0.145581	-0.104158	-0.108057	-0.0754185	-0.00323877	0.0621797	0.00443864	-0.0704667	-0.055821
361	-0.17441	-0.182595	-0.183946	-0.197534	-0.196224	-0.1968	-0.18676	-0.154875	-0.163478	-0.121028	-0.0951205	-0.0217146	0.0252915	0.067293	0.0945935	0.108713	0.0872289	0.0906851	0.0702301	0.0652903	0.00612846	0.0261162	0.0385751	-0.0163847	-0.0276128	-0.0120371	-0.0438601	-0.0693621	-0.0933346	-0.137584	-0.14865	-0.119751	-0.112769	-0.130968	-0.172324	-0.16408	-0.193195	-0.177976	-0.136653	-0.139151	-0.110819	-0.0900887	-0.0672651	-0.0461005	0.00493377	0.0506593	0.00642094	-0.0606842	-0.0461235
362	-0.131625	-0.137211	-0.126377	-0.156264	-0.186772	-0.195969	-0.181931	-0.158826	-0.163463	-0.112894	-0.0820359	-0.0169906	0.0305921	0.0691913	0.106643	0.123639	0.114844	0.114787	0.0783579	0.0632291	0.0100132	0.0324752	0.0445723	-0.0218885	-0.0401964	-0.0122283	-0.0310553	-0.0533569	-0.0837823	-0.141243	-0.159087	-0.137728	-0.140919	-0.170881	-0.195403	-0.174847	-0.19237	-0.176641	-0.14596	-0.128761	-0.106091	-0.072645	-0.0413605	-0.0150117	0.0354486	0.0799095	0.0320514	-0.037401	-0.0200633
363	-0.108434	-0.111396	-0.115257	-0.156694	-0.204105	-0.215475	-0.184341	-0.141514	-0.129106	-0.075789	-0.0374283	0.0216248	0.0920274	0.120486	0.154162	0.178822	0.172408	0.171851	0.10613	0.0882364	0.0377426	0.0535253	0.0621294	-0.0150782	-0.0343901	-0.0101932	-0.0400716	-0.0629496	-0.107031	-0.158692	-0.18027	-0.174083	-0.18958	-0.206484	-0.210776	-0.180535	-0.188953	-0.159871	-0.113224	-0.0900642	-0.0608065	-0.0117069	0.0191973	0.047662	0.123138	0.16981	0.125862	0.0508311	0.062113
364	-0.0978587	-0.113168	-0.10586	-0.135	-0.150552	-0.145521	-0.116783	-0.0892137	-0.082345	-0.0321226	-0.00729284	0.0406523	0.0990255	0.11264	0.103092	0.139147	0.123242	0.165018	0.145965	0.135311	0.0751213	0.0884908	0.0951176	0.0125884	-0.0105108	0.0170108	-0.0165659	-0.0404982	-0.0895727	-0.128254	-0.146323	-0.159977	-0.167716	-0.159163	-0.154564	-0.128285	-0.129677	-0.101924	-0.065673	-0.052729	-0.0310642	0.0102775	0.042963	0.0595718	0.126801	0.163261	0.135677	0.0655988	0.0711514
365	-0.114229	-0.128073	-0.113708	-0.14884	-0.165058	-0.151442	-0.132906	-0.106617	-0.106405	-0.0571861	-0.0410925	0.00850898	0.0733856	0.114486	0.104151	0.141216	0.0992756	0.132971	0.117524	0.0890326	0.0424121	0.0774509	0.0773265	-0.00111371	-0.00684288	0.0302368	-0.00789303	-0.0413704	-0.0911639	-0.133056	-0.14442	-0.142607	-0.144937	-0.149905	-0.163841	-0.136553	-0.143024	-0.117055	-0.0786203	-0.0633735	-0.0441719	-0.00445135	0.0196138	0.0328773	0.0809209	0.111176	0.0858084	0.014953	0.0209932
366	-0.0805863	-0.0958823	-0.103397	-0.145561	-0.184126	-0.172663	-0.145397	-0.118085	-0.113524	-0.071597	-0.0461956	0.00511891	0.074504	0.103987	0.081146	0.105916	0.0661263	0.115138	0.0890849	0.0664723	0.0390732	0.0728491	0.0686757	-0.00364698	-0.00394321	0.0281901	-0.00947264	-0.0336917	-0.0912872	-0.131648	-0.143324	-0.140321	-0.149745	-0.160026	-0.164021	-0.136704	-0.152437	-0.136002	-0.0995894	-0.0716219	-0.0524785	0.00246718	0.0317771	0.0598896	0.110075	0.13505	0.107884	0.0334454	0.031077
367	-0.0764105	-0.0908008	-0.100638	-0.136243	-0.179835	-0.175299	-0.146389	-0.130954	-0.116387	-0.0682753	-0.0344302	0.0138095	0.0807684	0.106014	0.0841982	0.112124	0.0865714	0.127775	0.0961198	0.088219	0.0443969	0.0610235	0.0602002	-0.00893041	-0.0159689	0.00730917	-0.0216967	-0.0460763	-0.0992894	-0.140081	-0.150721	-0.157443	-0.167515	-0.164209	-0.156882	-0.136459	-0.151899	-0.134824	-0.101258	-0.0696699	-0.0437956	0.0165996	0.053869	0.0951061	0.145428	0.160712	0.129896	0.0701629	0.0608928
368	-0.101453	-0.12197	-0.134699	-0.168904	-0.204797	-0.186441	-0.163385	-0.144899	-0.138961	-0.0874451	-0.0510384	0.0084018	0.0827033	0.110315	0.0886452	0.120478	0.0935419	0.118114	0.0950708	0.0862958	0.042286	0.0610229	0.0619154	-0.0133191	-0.0204263	0.0133208	-0.0123119	-0.0486029	-0.104566	-0.145843	-0.15458	-0.159531	-0.164633	-0.16161	-0.159385	-0.139437	-0.161878	-0.15188	-0.115511	-0.0912224	-0.054495	0.00728067	0.0443434	0.0849285	0.136663	0.153498	0.119886	0.0585712	0.0481521
369	-0.0798636	-0.102842	-0.113243	-0.158717	-0.20468	-0.182436	-0.159257	-0.143402	-0.134872	-0.0860794	-0.047504	0.0123546	0.0828844	0.105444	0.0670882	0.095402	0.0620338	0.109429	0.0997997	0.0874606	0.0561377	0.0875152	0.0844445	0.002017	0.000387829	0.0372219	0.0119861	-0.0221805	-0.0860297	-0.133766	-0.143801	-0.141813	-0.156598	-0.160114	-0.162022	-0.134927	-0.159139	-0.152782	-0.114155	-0.0843021	-0.0547768	0.0137913	0.0579168	0.0990415	0.147194	0.158146	0.121602	0.0552825	0.0473501
370	-0.0501741	-0.0733332	-0.0773799	-0.117961	-0.158815	-0.144106	-0.123596	-0.135672	-0.113588	-0.0680986	-0.028443	0.0150344	0.0428394	0.0406413	-0.00172748	0.0183287	0.0108668	0.0818017	0.0889183	0.0881715	0.0623856	0.0832157	0.0862437	0.0213401	0.0136685	0.0456038	0.0334067	0.0134768	-0.0405529	-0.0912844	-0.0969215	-0.0990707	-0.12117	-0.123538	-0.124199	-0.0929614	-0.122536	-0.131962	-0.10198	-0.0726038	-0.0443709	0.0103656	0.0584563	0.110136	0.140824	0.133419	0.0935804	0.0429894	0.029547
371	-0.0868855	-0.107743	-0.113425	-0.1535	-0.197158	-0.179757	-0.161527	-0.171247	-0.13971	-0.0902955	-0.0301817	0.0301163	0.0490094	0.0598457	0.0520272	0.0693855	0.0820194	0.100668	0.0889364	0.0856158	0.0336467	0.0486014	0.0639972	-0.00638336	-0.0216502	0.0125806	0.0203393	-0.0110017	-0.0548315	-0.115505	-0.121534	-0.119473	-0.140506	-0.144249	-0.141658	-0.115973	-0.143952	-0.155829	-0.124434	-0.0893408	-0.0468368	0.011532	0.0577318	0.121588	0.149986	0.133259	0.0886411	0.0500309	0.0289278
372	-0.0926458	-0.113037	-0.120252	-0.163077	-0.207489	-0.181719	-0.155057	-0.153354	-0.132958	-0.0808424	-0.0244628	0.0420565	0.0775956	0.0872934	0.0731026	0.0911822	0.0907188	0.11571	0.110775	0.0986391	0.0532989	0.0823311	0.096012	0.010259	-0.000555569	0.0385056	0.0400731	0.00135958	-0.0509267	-0.1136	-0.11794	-0.12046	-0.147074	-0.154274	-0.149447	-0.111573	-0.138875	-0.144728	-0.110432	-0.0727344	-0.0318692	0.0314503	0.0793742	0.138249	0.177369	0.167536	0.122714	0.0738461	0.0587038
373	-0.0470917	-0.0679438	-0.0624782	-0.101461	-0.136097	-0.122658	-0.103347	-0.126263	-0.0987079	-0.0503652	-0.0186832	0.0273023	0.044573	0.021377	-0.0248546	-0.0206177	-0.014937	0.0679379	0.112038	0.124361	0.0978294	0.121674	0.131393	0.0664151	0.0576867	0.0880093	0.0880455	0.0653693	0.0163772	-0.0477249	-0.0468788	-0.0562605	-0.0906273	-0.0998107	-0.097615	-0.0572127	-0.0887387	-0.10516	-0.0833044	-0.0575482	-0.0285566	0.0218209	0.075922	0.132774	0.161023	0.147793	0.0957285	0.0495973	0.0407984
374	-0.0480252	-0.0615969	-0.0415731	-0.0753752	-0.106551	-0.10468	-0.101061	-0.138616	-0.0964198	-0.0548858	-0.0185658	0.0208908	0.007018	-0.0269043	-0.0475988	-0.0505179	-0.0119242	0.0518377	0.0946995	0.125905	0.0885847	0.091875	0.114789	0.0652758	0.0450434	0.077271	0.0966688	0.0756913	0.0463991	-0.0183317	-0.0167131	-0.0135256	-0.0451194	-0.0596515	-0.0623403	-0.0392108	-0.0770703	-0.101231	-0.0802208	-0.061537	-0.0302748	0.00346081	0.0576397	0.118348	0.136962	0.116073	0.0520234	0.0197451	0.0127032
375	-0.0731078	-0.0818465	-0.0755856	-0.112896	-0.141815	-0.129117	-0.115159	-0.134972	-0.0876911	-0.0472232	0.00459619	0.0414104	0.0268564	0.00689498	0.0129851	0.0162713	0.0487774	0.0827365	0.0942254	0.109423	0.0649718	0.0629951	0.0935997	0.0406535	0.0112262	0.0464914	0.0667251	0.0421553	0.0153298	-0.0373561	-0.0385724	-0.0340677	-0.0647415	-0.0781797	-0.0738405	-0.051534	-0.0873475	-0.106653	-0.0780295	-0.0570093	-0.0108782	0.0270396	0.0798225	0.140182	0.160791	0.13669	0.0819398	0.0526572	0.0399198
376	-0.101752	-0.110324	-0.110221	-0.153771	-0.191796	-0.17471	-0.16007	-0.168858	-0.127142	-0.0874426	-0.00494341	0.0362351	0.0048365	0.0201964	0.0805282	0.0874604	0.124641	0.0849622	0.0333473	0.0254692	-0.0238245	-0.0250146	0.0109048	-0.0353354	-0.0588552	-0.0200066	0.0109145	-0.0184423	-0.0402403	-0.0931204	-0.0882198	-0.0718036	-0.0896853	-0.10532	-0.104597	-0.0940062	-0.132218	-0.146568	-0.109969	-0.0847614	-0.0291015	0.00372443	0.0357042	0.0917691	0.114827	0.092271	0.0393915	0.016883	0.000146345
377	-0.0803766	-0.0928491	-0.111968	-0.148455	-0.178089	-0.150929	-0.120144	-0.102682	-0.066357	-0.0337468	0.0532679	0.103435	0.0689905	0.088269	0.141977	0.168158	0.173929	0.138707	0.0555662	-0.00320278	-0.0402433	-0.0313422	-0.00230623	-0.0612044	-0.072819	-0.0424885	-0.0314561	-0.0635509	-0.0895096	-0.122354	-0.123216	-0.116132	-0.131227	-0.135744	-0.116496	-0.0931447	-0.104126	-0.102913	-0.0692697	-0.0219774	0.025934	0.0688992	0.0927594	0.135156	0.163509	0.132748	0.116341	0.0998658	0.0694792
378	-0.0405154	-0.0501372	-0.0792032	-0.108314	-0.128591	-0.105405	-0.0622534	-0.0418177	-0.0085971	0.0261608	0.0862182	0.120853	0.112021	0.0937956	0.132052	0.163215	0.159508	0.156413	0.0968421	0.0440952	0.0131062	0.0290305	0.0572312	-0.00349838	-0.0129634	0.00964796	0.00423489	-0.0296205	-0.0517955	-0.0748283	-0.0763283	-0.0738596	-0.10021	-0.110123	-0.0905123	-0.0585246	-0.0556839	-0.0503322	-0.0129696	0.0361747	0.0750301	0.119532	0.143007	0.166371	0.19606	0.166933	0.158233	0.141638	0.117301
379	-0.00653029	-0.0187702	-0.0499499	-0.0601514	-0.0681325	-0.053248	-0.00873658	-0.00449907	0.0177215	0.0504709	0.098366	0.126603	0.111723	0.066825	0.073124	0.102567	0.0892115	0.131665	0.107519	0.0426026	0.0323924	0.0579842	0.0742426	0.0208108	0.0175791	0.0319962	0.0183922	-0.00969661	-0.0286471	-0.0464448	-0.0491375	-0.0691116	-0.089592	-0.0876126	-0.0634865	-0.0243718	-0.0124743	-0.0133277	0.0050276	0.0559255	0.0834229	0.12251	0.14859	0.158629	0.178504	0.143606	0.148	0.136479	0.110736
380	-0.0585815	-0.0767435	-0.0967501	-0.131052	-0.152334	-0.113876	-0.0813616	0.00183871	-0.0250523	-0.000238835	-0.00178626	0.0619417	0.182819	0.18952	0.200065	0.237417	0.184743	0.182926	0.086062	0.0561234	0.0394225	0.0493237	0.0497129	-0.00737139	-0.00343404	0.00779888	-0.0200355	-0.0562522	-0.096923	-0.105755	-0.115822	-0.126825	-0.126131	-0.129696	-0.115831	-0.0929572	-0.0735327	-0.0332093	0.0141161	0.0460547	0.0660943	0.121871	0.112161	0.129221	0.187552	0.207708	0.215926	0.166712	0.154441
381	-0.0396659	-0.0543027	-0.0979803	-0.127478	-0.148014	-0.106827	-0.0717294	0.00503771	-0.00604635	0.0217095	0.0372996	0.0879234	0.155729	0.164537	0.177672	0.225485	0.171901	0.169971	0.0823572	0.0295624	0.012433	0.0211824	0.0229895	-0.029181	-0.0292451	-0.028617	-0.0541845	-0.0826343	-0.108449	-0.108162	-0.127488	-0.141196	-0.132775	-0.131	-0.1135	-0.0939858	-0.0612467	-0.0321225	0.00965007	0.06129	0.0728581	0.132357	0.128119	0.141307	0.185724	0.179192	0.199852	0.174446	0.151322
382	-0.0437303	-0.0476415	-0.0972549	-0.128779	-0.158307	-0.122748	-0.096125	-0.00452298	-0.0245225	-0.00209882	0.00326963	0.0532496	0.128368	0.160577	0.162818	0.207766	0.142581	0.133096	0.0567212	0.00341438	-0.0100021	0.00787856	-0.00567483	-0.0544838	-0.0514255	-0.0650133	-0.0883458	-0.106317	-0.125266	-0.117946	-0.133712	-0.142781	-0.124657	-0.123874	-0.128734	-0.11264	-0.0876924	-0.0538236	-0.00309459	0.0362965	0.04134	0.090131	0.0852662	0.0957404	0.13544	0.138121	0.148945	0.123894	0.114085
383	-0.0804544	-0.0708597	-0.143937	-0.186904	-0.179908	-0.161117	-0.147882	-0.100954	-0.0775711	-0.0475253	-0.0289101	0.0288976	0.070003	0.125332	0.126683	0.14424	0.0976286	0.0661815	0.0145513	-0.00239781	-0.0284418	-0.00243516	-0.0201361	-0.0608811	-0.0746822	-0.0921188	-0.0787406	-0.0904	-0.0977778	-0.10933	-0.128097	-0.143479	-0.136294	-0.131568	-0.130618	-0.112982	-0.115991	-0.115444	-0.0939083	-0.0534105	-0.0263399	0.0247091	0.0511501	0.0898987	0.102234	0.0869959	0.060916	0.0526013	0.0418336
384	-0.0918406	-0.09614	-0.164071	-0.164171	-0.157807	-0.150311	-0.163274	-0.139687	-0.134875	-0.102691	-0.0827242	-0.0243881	0.0193361	0.0792688	0.0767534	0.0711962	0.0190615	-0.00798498	-0.0366	-0.0604758	-0.0827804	-0.0532223	-0.0529818	-0.0786375	-0.101893	-0.0982853	-0.0803375	-0.0957963	-0.093879	-0.117879	-0.133163	-0.147487	-0.12154	-0.121476	-0.134137	-0.117895	-0.140911	-0.150688	-0.146003	-0.11696	-0.0912335	-0.0603863	-0.0518428	-0.0174011	-0.00741269	-0.00505165	-0.0276496	-0.0435429	-0.0605356
385	-0.101559	-0.113022	-0.116025	-0.140625	-0.146769	-0.142044	-0.15754	-0.130366	-0.126302	-0.123829	-0.123166	-0.0808495	-0.0185098	0.061114	0.0588247	0.0692179	0.0157499	-0.0186633	-0.0517492	-0.0632328	-0.0895798	-0.0817774	-0.0957083	-0.102465	-0.112034	-0.113211	-0.103884	-0.123028	-0.126531	-0.126203	-0.134819	-0.145402	-0.0934164	-0.0894132	-0.115193	-0.11765	-0.14172	-0.140683	-0.128954	-0.138695	-0.112444	-0.0885247	-0.0873932	-0.0606195	-0.0515257	-0.0312226	-0.0456727	-0.0724384	-0.0686145
386	-0.125243	-0.132443	-0.120682	-0.145192	-0.118011	-0.10233	-0.0951808	-0.0734299	-0.060824	-0.0509388	-0.0440007	-0.018997	0.010317	0.0518353	0.0456337	0.0688338	0.0336275	0.0248336	-0.019106	-0.0377904	-0.0612966	-0.0686519	-0.0914809	-0.0977536	-0.102686	-0.118361	-0.108606	-0.115934	-0.125026	-0.106445	-0.117469	-0.14909	-0.0994552	-0.0729828	-0.0759205	-0.080259	-0.0857358	-0.0826429	-0.0739646	-0.0768466	-0.0423159	-0.0261332	-0.0118531	0.00436718	0.0140964	0.0214774	0.0193944	0.0005987	-0.00147668
387	-0.0664396	-0.0803626	-0.0856564	-0.0874893	-0.0917589	-0.0950858	-0.0878575	-0.0597587	-0.0570799	-0.0378363	-0.0301729	-0.0278561	-0.000355405	0.00968036	-0.00798802	0.00683941	-0.0233072	-0.00743952	-0.0221568	-0.0295862	-0.0506148	-0.0694794	-0.0841486	-0.0947675	-0.112847	-0.129457	-0.13082	-0.12853	-0.133762	-0.129181	-0.140986	-0.152981	-0.112659	-0.105995	-0.11166	-0.0961119	-0.0922722	-0.0876811	-0.078625	-0.0606579	-0.0486445	-0.03161	-0.00876595	-0.000290129	0.018148	0.0276603	0.0373003	0.0139003	0.00549383
388	-0.0720068	-0.0915184	-0.0815293	-0.0903562	-0.118573	-0.123829	-0.130049	-0.0846042	-0.0927826	-0.0820886	-0.0820381	-0.0633726	0.00320879	0.0186273	0.00148378	0.0232592	-0.0114	-0.00612443	-0.0300773	-0.0440755	-0.0700455	-0.0863471	-0.0945167	-0.113306	-0.117328	-0.116759	-0.14655	-0.164984	-0.177316	-0.168849	-0.16819	-0.156649	-0.107427	-0.108438	-0.132339	-0.136199	-0.142796	-0.11724	-0.082796	-0.0987188	-0.087385	-0.074014	-0.0533298	-0.0443494	-0.00851866	0.0248078	0.0332578	-0.00972423	-0.00660523
389	-0.132849	-0.15445	-0.115769	-0.13357	-0.146193	-0.12894	-0.129522	-0.076289	-0.0767747	-0.0742553	-0.0690279	-0.0448014	0.00664061	0.0389907	0.0327612	0.0601606	0.0428731	0.0262494	-0.0230286	-0.0472958	-0.0793536	-0.0965154	-0.105031	-0.116995	-0.118441	-0.107285	-0.120922	-0.158228	-0.170349	-0.1562	-0.154969	-0.147861	-0.0994708	-0.0955437	-0.117501	-0.130648	-0.136742	-0.104163	-0.0549205	-0.0992309	-0.0760785	-0.070467	-0.0558071	-0.0511572	-0.0155691	0.0284485	0.0274677	-0.0124565	-0.00146887
390	-0.142949	-0.157905	-0.130611	-0.137667	-0.144877	-0.142513	-0.136998	-0.0736869	-0.0837377	-0.0596136	-0.0584616	-0.0371193	0.00247303	0.0307934	0.0270729	0.0515741	0.0482618	0.0149326	-0.0425516	-0.0386628	-0.0849107	-0.111946	-0.125915	-0.134736	-0.134727	-0.135095	-0.156509	-0.175937	-0.186784	-0.171029	-0.180814	-0.158081	-0.105275	-0.107946	-0.134475	-0.167748	-0.165208	-0.128453	-0.085253	-0.109398	-0.0967279	-0.0960028	-0.0747329	-0.068398	-0.021838	0.0339838	0.0311544	-0.00985437	9.47084e-05
391	-0.136698	-0.147471	-0.129015	-0.140046	-0.179456	-0.177798	-0.184207	-0.121112	-0.138025	-0.101751	-0.0877557	-0.0603573	-0.0185002	0.0282485	0.0755776	0.087898	0.0951556	0.00699376	-0.0889796	-0.0850126	-0.132392	-0.148857	-0.156268	-0.169325	-0.159714	-0.153882	-0.169619	-0.186619	-0.187062	-0.191925	-0.194761	-0.153828	-0.109446	-0.135032	-0.174577	-0.195732	-0.200849	-0.171825	-0.131539	-0.135146	-0.144138	-0.141253	-0.130993	-0.117688	-0.0684224	-0.00894252	-0.0138937	-0.0525561	-0.0470572
392	-0.153228	-0.153549	-0.130018	-0.127598	-0.143438	-0.150824	-0.161893	-0.100917	-0.13075	-0.1064	-0.105609	-0.0826852	-0.0437322	0.000132485	0.0330091	0.0359996	0.0352656	-0.0345568	-0.0940934	-0.0742672	-0.125142	-0.142986	-0.146732	-0.145781	-0.145759	-0.145603	-0.151513	-0.158147	-0.152188	-0.163653	-0.16107	-0.111489	-0.0734407	-0.106275	-0.163278	-0.175591	-0.18653	-0.152803	-0.112162	-0.130457	-0.148246	-0.165542	-0.163697	-0.152781	-0.114322	-0.0558195	-0.0790328	-0.113221	-0.0941985
393	-0.129696	-0.144073	-0.149407	-0.143029	-0.161917	-0.174584	-0.196744	-0.152938	-0.200969	-0.175067	-0.176511	-0.133038	-0.0845791	-0.0346612	0.0159994	0.00104667	0.0015634	-0.0595819	-0.0936154	-0.0585287	-0.110578	-0.123946	-0.106483	-0.10081	-0.118637	-0.113139	-0.109284	-0.119744	-0.105363	-0.136702	-0.131341	-0.0602078	-0.0398457	-0.0924575	-0.174342	-0.170427	-0.206518	-0.194492	-0.158565	-0.184109	-0.20599	-0.21605	-0.216572	-0.189686	-0.157506	-0.0992894	-0.120012	-0.168648	-0.160289
394	-0.106918	-0.11268	-0.109842	-0.104276	-0.112191	-0.132109	-0.159419	-0.119714	-0.184082	-0.174959	-0.206366	-0.177383	-0.12337	-0.0742949	-0.0392411	-0.0493311	-0.060409	-0.114922	-0.130584	-0.08445	-0.128753	-0.144947	-0.118181	-0.1045	-0.127502	-0.116406	-0.103019	-0.10725	-0.0885266	-0.122443	-0.113929	-0.0365141	-0.0111651	-0.0660018	-0.15662	-0.149147	-0.176431	-0.159461	-0.141423	-0.177301	-0.208862	-0.241893	-0.243745	-0.218345	-0.19884	-0.145474	-0.160387	-0.193152	-0.181171
395	-0.107777	-0.115639	-0.0962714	-0.0877751	-0.0763222	-0.0886359	-0.102892	-0.0625808	-0.103405	-0.106792	-0.150157	-0.140187	-0.100617	-0.071661	-0.0718922	-0.0815885	-0.0833547	-0.112487	-0.102545	-0.0486279	-0.0789741	-0.105234	-0.0844399	-0.0640703	-0.0967576	-0.0995345	-0.0843908	-0.0793089	-0.0510401	-0.0770616	-0.0872336	-0.0399982	-0.0128581	-0.0570897	-0.104711	-0.107332	-0.115067	-0.0899358	-0.0821199	-0.118365	-0.138837	-0.178556	-0.16749	-0.152641	-0.143867	-0.108166	-0.114717	-0.129265	-0.119594
396	-0.159695	-0.172021	-0.163387	-0.160599	-0.154023	-0.149597	-0.175068	-0.13755	-0.170219	-0.147748	-0.178957	-0.130954	-0.0706613	-0.0298564	-0.00781621	-0.0337341	-0.0314381	-0.0683624	-0.0681042	0.00415563	-0.0426765	-0.0699037	-0.0341562	-0.0202255	-0.0623975	-0.0691122	-0.0560874	-0.0515383	-0.0161654	-0.0590905	-0.0724875	-0.017238	-0.000149768	-0.0605021	-0.117274	-0.122999	-0.157111	-0.147436	-0.127303	-0.162394	-0.164965	-0.181704	-0.182906	-0.152865	-0.127507	-0.0860503	-0.114782	-0.154599	-0.141132
397	-0.153091	-0.162132	-0.160435	-0.147098	-0.137314	-0.148092	-0.193316	-0.169523	-0.234922	-0.215345	-0.257672	-0.204151	-0.151802	-0.0912438	-0.0563094	-0.0928004	-0.0955785	-0.143932	-0.132433	-0.0473322	-0.0994328	-0.126843	-0.0739663	-0.0419394	-0.0880062	-0.0892703	-0.0623129	-0.0590753	-0.0124732	-0.0656702	-0.0637213	0.022674	0.0448883	-0.0348257	-0.125271	-0.12767	-0.183522	-0.179229	-0.173194	-0.218601	-0.243079	-0.272859	-0.280372	-0.244314	-0.23335	-0.181663	-0.215452	-0.256877	-0.23909
398	-0.12149	-0.128109	-0.108269	-0.0857963	-0.0476717	-0.0557014	-0.090718	-0.0792223	-0.137539	-0.145969	-0.21176	-0.192716	-0.167248	-0.135423	-0.131437	-0.164399	-0.169931	-0.182616	-0.132173	-0.0534506	-0.0766264	-0.112068	-0.0674462	-0.0140229	-0.059822	-0.0728879	-0.0451899	-0.0331677	0.0235492	-0.00983159	-0.0104271	0.0581909	0.0803409	0.0188236	-0.0465758	-0.0571278	-0.0898342	-0.0761239	-0.089851	-0.144044	-0.176011	-0.230557	-0.233016	-0.213478	-0.225916	-0.197952	-0.211725	-0.223839	-0.208465
399	-0.124514	-0.13398	-0.111456	-0.0813417	-0.0442061	-0.0457385	-0.0689885	-0.0584844	-0.0925639	-0.0951064	-0.151027	-0.139539	-0.123219	-0.103262	-0.121901	-0.15979	-0.155186	-0.14206	-0.0703538	0.00275844	-0.0090306	-0.0447897	-0.00224669	0.0407439	-0.0079731	-0.0265187	0.00188031	0.0230547	0.0747971	0.0352464	0.0223312	0.0709385	0.0735145	0.0186024	-0.02338	-0.0348564	-0.0583022	-0.0467918	-0.0682702	-0.104455	-0.118726	-0.168673	-0.172264	-0.163569	-0.172351	-0.157884	-0.171631	-0.179425	-0.167671
400	-0.140257	-0.153661	-0.150963	-0.130068	-0.113817	-0.12168	-0.155346	-0.148683	-0.182994	-0.163572	-0.20576	-0.161011	-0.129288	-0.0814412	-0.0780277	-0.125562	-0.125498	-0.125914	-0.0610464	0.0179592	-0.0203529	-0.0449717	0.0104642	0.0351952	-0.0253174	-0.027406	0.009687	0.0140472	0.0686595	-0.00825733	-0.0200613	0.0583053	0.0533043	-0.0304925	-0.0949917	-0.102399	-0.142694	-0.140416	-0.140731	-0.172983	-0.183046	-0.216844	-0.221501	-0.200616	-0.195943	-0.163628	-0.198419	-0.233869	-0.215725
401	-0.120972	-0.132169	-0.12603	-0.104517	-0.0757559	-0.0865639	-0.121807	-0.120614	-0.176018	-0.176985	-0.24102	-0.210752	-0.18321	-0.126032	-0.128428	-0.180503	-0.186567	-0.190046	-0.117722	-0.0358676	-0.0620095	-0.0964862	-0.0423137	0.00733654	-0.0485843	-0.0609066	-0.01847	-0.0100463	0.0523375	-0.00981295	-0.0103536	0.0775944	0.0869084	-0.000330407	-0.0688677	-0.0814472	-0.118738	-0.114892	-0.122246	-0.174687	-0.204119	-0.24816	-0.26294	-0.239178	-0.249672	-0.213936	-0.241818	-0.267956	-0.247248
402	-0.109638	-0.11619	-0.0953316	-0.057294	-0.00716972	-0.00474784	-0.0308901	-0.0371427	-0.0820565	-0.0965845	-0.17327	-0.168149	-0.15827	-0.140058	-0.160124	-0.210041	-0.20646	-0.179898	-0.0910148	-0.0193293	-0.0133119	-0.0489261	-0.00707459	0.0575337	0.0124287	-0.0136847	0.0225782	0.0480504	0.108631	0.073094	0.0757677	0.141286	0.141107	0.0706195	0.0211941	0.00660328	-0.0211437	-0.0171815	-0.0453995	-0.0983594	-0.128656	-0.177756	-0.194789	-0.190705	-0.219609	-0.211293	-0.220978	-0.221235	-0.206624
403	-0.104898	-0.112013	-0.0998494	-0.067496	-0.0332322	-0.0371631	-0.0638634	-0.0688352	-0.101986	-0.0939869	-0.148784	-0.127194	-0.106654	-0.0916341	-0.11734	-0.166802	-0.157219	-0.124775	-0.037256	0.0244758	0.0193844	-0.0069172	0.0442228	0.079163	0.0309398	0.023027	0.0637737	0.0791836	0.135949	0.0689317	0.0590402	0.132896	0.109677	0.0283548	-0.0166081	-0.0261629	-0.0536427	-0.0479035	-0.0721205	-0.101913	-0.116868	-0.154711	-0.157704	-0.150288	-0.161147	-0.151931	-0.174108	-0.189026	-0.174873
404	-0.117662	-0.129947	-0.124812	-0.113251	-0.0880222	-0.10171	-0.127205	-0.124762	-0.155695	-0.143279	-0.187692	-0.15174	-0.135474	-0.0940556	-0.106872	-0.164311	-0.159604	-0.149127	-0.0661954	-0.00330602	-0.0251207	-0.0484501	0.000668837	0.0323136	-0.0229925	-0.0220896	0.0205803	0.0270795	0.085143	0.00783886	-0.00249123	0.0868862	0.0746259	-0.013729	-0.0696369	-0.0851791	-0.120961	-0.114569	-0.119047	-0.153732	-0.163662	-0.199359	-0.204114	-0.188256	-0.193246	-0.165883	-0.204335	-0.232108	-0.208304
405	-0.102511	-0.113827	-0.115276	-0.118514	-0.123576	-0.141455	-0.174522	-0.177187	-0.207705	-0.181048	-0.194567	-0.132388	-0.104369	-0.0495912	-0.0437718	-0.101694	-0.0972468	-0.114765	-0.0727693	-0.0280017	-0.0543846	-0.0727761	-0.0312406	-0.0130505	-0.0585228	-0.054703	-0.0177878	-0.0131021	0.031817	-0.0465804	-0.053087	0.029674	0.0206792	-0.0604858	-0.116221	-0.129966	-0.167522	-0.170295	-0.164308	-0.188683	-0.187299	-0.196956	-0.205603	-0.180168	-0.167905	-0.127172	-0.174492	-0.218473	-0.196063
406	-0.0929428	-0.0978236	-0.0952176	-0.116449	-0.128433	-0.139772	-0.16613	-0.173516	-0.194224	-0.170446	-0.165018	-0.115689	-0.100048	-0.0435343	-0.0244852	-0.0746124	-0.06847	-0.103563	-0.0863664	-0.0606476	-0.0803833	-0.0874254	-0.0654756	-0.0506658	-0.0770042	-0.0711598	-0.0512343	-0.0472266	-0.0194486	-0.073239	-0.0700673	-0.00312711	-0.00429866	-0.0709289	-0.122736	-0.130103	-0.161504	-0.169978	-0.154561	-0.171775	-0.168158	-0.172767	-0.183923	-0.160076	-0.14706	-0.108006	-0.148322	-0.188247	-0.171819
407	-0.101402	-0.101354	-0.0915878	-0.115538	-0.127736	-0.131771	-0.155281	-0.158551	-0.172981	-0.151714	-0.146669	-0.108343	-0.0999232	-0.0543312	-0.0252972	-0.0691696	-0.0619804	-0.10253	-0.0905164	-0.0718331	-0.0921267	-0.088528	-0.0751554	-0.0620718	-0.0777422	-0.0658622	-0.0516267	-0.0507328	-0.0331834	-0.0744111	-0.0648617	-0.0119066	-0.00525872	-0.0614214	-0.108976	-0.112024	-0.147138	-0.156771	-0.136639	-0.150354	-0.151852	-0.158572	-0.168845	-0.150261	-0.14365	-0.10976	-0.144646	-0.173459	-0.159625
408	-0.0854312	-0.0863986	-0.0648409	-0.0920309	-0.118548	-0.123298	-0.145957	-0.155471	-0.172914	-0.149264	-0.132811	-0.0862877	-0.0678206	-0.0173633	0.0154565	-0.0220056	-0.0159273	-0.0706703	-0.0871191	-0.0801357	-0.0958349	-0.0950759	-0.0890095	-0.0843055	-0.0973728	-0.0862387	-0.0769368	-0.0757113	-0.068572	-0.0914576	-0.0813152	-0.0340474	-0.0250752	-0.0730385	-0.114855	-0.11935	-0.151727	-0.159085	-0.143325	-0.154946	-0.147392	-0.141981	-0.148668	-0.125843	-0.112333	-0.0736633	-0.104183	-0.139038	-0.132896
409	-0.0717958	-0.0732412	-0.0751976	-0.0916877	-0.118489	-0.127946	-0.150912	-0.162507	-0.184873	-0.155393	-0.139603	-0.0823108	-0.0436907	0.0118012	0.0369085	-0.00383383	-0.0119011	-0.0698792	-0.0925527	-0.0806871	-0.0987614	-0.0983883	-0.0877931	-0.0838171	-0.097168	-0.0935335	-0.082631	-0.0761417	-0.0676183	-0.0960729	-0.0896563	-0.0381166	-0.0350956	-0.0851516	-0.120455	-0.128275	-0.155639	-0.161595	-0.149296	-0.165994	-0.154097	-0.140137	-0.149489	-0.122598	-0.106312	-0.0654954	-0.0952783	-0.135744	-0.130958
410	-0.118138	-0.125916	-0.128991	-0.136614	-0.154725	-0.161016	-0.187977	-0.185974	-0.213185	-0.183119	-0.177479	-0.107875	-0.0586382	0.0011979	0.0266523	-0.0216372	-0.0338178	-0.0843393	-0.0890221	-0.0693911	-0.0976462	-0.0911541	-0.0813551	-0.0840361	-0.0996687	-0.083564	-0.0752533	-0.0772205	-0.0621885	-0.110416	-0.103113	-0.0402082	-0.0317755	-0.0887652	-0.142116	-0.149788	-0.185514	-0.189476	-0.169895	-0.190297	-0.184402	-0.175611	-0.192123	-0.164325	-0.145939	-0.0986034	-0.13616	-0.179428	-0.170441
411	-0.112319	-0.125292	-0.141085	-0.150218	-0.172591	-0.176081	-0.203201	-0.189899	-0.211006	-0.177081	-0.169607	-0.0950711	-0.0321351	0.0199095	0.0342382	-0.00668007	-0.0259534	-0.0634654	-0.0650217	-0.0518305	-0.0743791	-0.0615587	-0.06085	-0.0734505	-0.0798265	-0.06323	-0.0620229	-0.0738647	-0.0670821	-0.112797	-0.107934	-0.048555	-0.0328267	-0.0911831	-0.148837	-0.153371	-0.19854	-0.1991	-0.173149	-0.184974	-0.177359	-0.164155	-0.16884	-0.141067	-0.113383	-0.0638499	-0.104774	-0.15832	-0.150194
412	-0.0761047	-0.0833556	-0.102949	-0.105076	-0.12048	-0.122145	-0.145799	-0.136818	-0.154663	-0.13226	-0.117612	-0.0706429	-0.0428459	-0.00967558	-0.00160313	-0.0290433	-0.0398134	-0.0480618	-0.0376284	-0.0434854	-0.057631	-0.0422764	-0.0453858	-0.0569274	-0.0538979	-0.0456499	-0.0408933	-0.0432151	-0.0440164	-0.0761414	-0.0718018	-0.0273288	-0.00444302	-0.0490662	-0.0965788	-0.0995141	-0.139045	-0.141293	-0.120714	-0.132256	-0.124903	-0.119444	-0.119217	-0.0995747	-0.0931317	-0.0739019	-0.096376	-0.129528	-0.131161
413	-0.124883	-0.131692	-0.156483	-0.166173	-0.167759	-0.170835	-0.207605	-0.201868	-0.221347	-0.185985	-0.168338	-0.109173	-0.0825968	-0.0471807	-0.0207952	-0.057009	-0.0578154	-0.0675841	-0.0375456	-0.0233644	-0.0558962	-0.0485088	-0.0381311	-0.0488001	-0.0669537	-0.0611322	-0.0453097	-0.0559801	-0.0415775	-0.0940508	-0.0970109	-0.0385947	-0.0225094	-0.0803213	-0.128744	-0.148649	-0.202349	-0.207788	-0.185284	-0.20091	-0.186216	-0.184621	-0.168687	-0.128254	-0.107754	-0.0675784	-0.116086	-0.166586	-0.154526
414	-0.12532	-0.136633	-0.175009	-0.172935	-0.175093	-0.185217	-0.2259	-0.215173	-0.251278	-0.210524	-0.209672	-0.135989	-0.0751477	-0.0422958	-0.0383829	-0.0729212	-0.0874595	-0.0747689	-0.0265671	0.0117491	-0.023862	-0.0137429	-0.00171057	-0.0172189	-0.0316742	-0.00955434	-0.0161747	-0.0362579	-0.0315413	-0.0914368	-0.0832216	-0.00154864	-0.00154164	-0.0656474	-0.149206	-0.145565	-0.225499	-0.23019	-0.196633	-0.226267	-0.221974	-0.223164	-0.210031	-0.180196	-0.140792	-0.082047	-0.136588	-0.212903	-0.192614
415	-0.107221	-0.10907	-0.136915	-0.133419	-0.13702	-0.15821	-0.184193	-0.174151	-0.214091	-0.18993	-0.165577	-0.100142	-0.0814779	-0.0308206	0.0023389	-0.0237442	-0.0296612	-0.0580725	-0.0512977	-0.0633985	-0.0879484	-0.0510116	-0.0588119	-0.096216	-0.060784	-0.0304939	-0.0477287	-0.0542837	-0.0919487	-0.135257	-0.0976331	-0.0380867	-0.0436075	-0.0676339	-0.14553	-0.139043	-0.193101	-0.205167	-0.156168	-0.186356	-0.188354	-0.207047	-0.194736	-0.176112	-0.143903	-0.0925533	-0.132988	-0.189779	-0.182478
416	-0.0360968	-0.036286	-0.0486293	-0.0173444	-0.0161804	-0.0394336	-0.0636966	-0.0556845	-0.104273	-0.135898	-0.154383	-0.148998	-0.140163	-0.0944566	-0.0854225	-0.09408	-0.0912983	-0.104719	-0.0728963	-0.0930108	-0.0984304	-0.0761603	-0.0894929	-0.120998	-0.0818144	-0.0444678	-0.0650301	-0.0637445	-0.107294	-0.0929063	-0.0540169	-0.0282541	-0.0068875	0.0260883	-0.0215051	-0.0688906	-0.09678	-0.0895626	-0.064171	-0.13072	-0.152055	-0.198312	-0.191594	-0.198182	-0.197829	-0.161103	-0.149276	-0.167845	-0.171081
417	-0.0339385	-0.0368736	-0.0493967	-0.0302337	-0.032273	-0.0456279	-0.0537526	-0.0434762	-0.0711505	-0.0877755	-0.0946181	-0.0758701	-0.0598802	-0.0281425	-0.04587	-0.0587667	-0.0647184	-0.0610519	-0.0272071	-0.0510534	-0.0458432	-0.00680432	-0.0414007	-0.0942893	-0.0375357	-0.0085212	-0.037585	-0.0329019	-0.097636	-0.10108	-0.0432162	-0.0263889	-0.0337533	0.00230292	-0.0574338	-0.0413677	-0.0582404	-0.071975	-0.0332663	-0.0763844	-0.0990174	-0.121594	-0.10962	-0.108058	-0.101569	-0.0925755	-0.0946303	-0.0964687	-0.108638
418	-0.0191223	-0.0328135	-0.0785143	-0.0728209	-0.076313	-0.0803258	-0.0994979	-0.0859802	-0.106126	-0.108897	-0.129413	-0.0847221	-0.0277025	0.00256608	-0.0482649	-0.0788226	-0.104778	-0.0671779	-0.0133494	-0.0110034	0.00658559	0.0367832	-0.00107977	-0.0457056	0.000214112	0.0149439	-0.0144134	-0.0109786	-0.0739426	-0.0776986	-0.0344934	-0.0100911	-0.0156908	-0.00206804	-0.0621022	-0.0579953	-0.096657	-0.109236	-0.0668713	-0.0956729	-0.113286	-0.109157	-0.0948581	-0.0725762	-0.0621715	-0.0467539	-0.0499999	-0.0811648	-0.100101
419	-0.0362462	-0.0553041	-0.103825	-0.105399	-0.0853684	-0.0807404	-0.0949052	-0.115915	-0.106922	-0.102209	-0.135746	-0.0928807	-0.0453408	-0.0508096	-0.0842165	-0.138419	-0.129952	-0.078576	-0.00479392	0.0596215	0.07685	0.0633643	0.0419788	0.0479931	0.049794	0.0221117	0.0212304	0.0333878	0.0260078	0.0316802	0.0347558	0.0377243	0.0438304	0.0301466	0.0131633	-0.0102946	-0.0678842	-0.0962317	-0.0957123	-0.108567	-0.104119	-0.0827104	-0.0711961	-0.0268724	-0.032861	-0.0230085	-0.0442695	-0.073329	-0.0952753
420	-0.0187064	-0.0314265	-0.114595	-0.143324	-0.178573	-0.18017	-0.19493	-0.165162	-0.169042	-0.177663	-0.214674	-0.145152	-0.0104659	0.0501137	0.0246288	-0.0150282	-0.0671122	-0.0766266	-0.0802701	-0.00761289	0.00522315	0.0052389	-0.010844	-0.0138776	0.00611644	-0.00294403	-0.0133171	-0.0177367	-0.0520073	-0.0532434	-0.0435487	-0.0114848	0.00156425	-0.0206885	-0.0711661	-0.106962	-0.183733	-0.178731	-0.127878	-0.157537	-0.141048	-0.102914	-0.113908	-0.0655399	-0.0341309	0.0080952	-0.0231981	-0.0765676	-0.091354
421	0.00468763	-0.00963804	-0.0788971	-0.106301	-0.156217	-0.166119	-0.161796	-0.139974	-0.14137	-0.152053	-0.183466	-0.137114	-0.0262038	0.017961	0.00605447	-0.0190031	-0.0587908	-0.0622364	-0.0757543	-0.0117887	0.014523	0.00108488	-0.00351888	0.0118081	0.0221864	0.00404247	0.00399006	0.00283884	-0.0181658	-0.0184068	-0.019533	0.00492131	0.00706493	-0.0193054	-0.054216	-0.0805077	-0.157464	-0.156362	-0.109129	-0.128855	-0.119469	-0.069281	-0.0838855	-0.0393227	-0.018952	0.0168565	-0.0160762	-0.0641391	-0.0732085
422	-0.000213265	-0.0105774	-0.0743644	-0.0860337	-0.0980771	-0.120768	-0.102363	-0.0834462	-0.0850922	-0.0824146	-0.124655	-0.0840367	0.0121903	0.0568941	0.0663457	0.0485214	0.00478955	-0.0174415	-0.0613926	-0.0237643	0.00584975	-0.00941885	-0.0236391	-0.00484947	0.0159286	-0.00930199	-0.0211672	-0.0115203	-0.0322384	-0.0241788	-0.0355073	-0.019413	-0.0334642	-0.0558951	-0.0734939	-0.079432	-0.115332	-0.100351	-0.065196	-0.0647576	-0.0542467	-0.0161703	-0.0486548	-0.0201299	-2.82015e-05	0.0353081	0.0196845	-0.016294	-0.0252491
423	-0.0118202	-0.0120919	-0.0629176	-0.10013	-0.129796	-0.136866	-0.137555	-0.115622	-0.116056	-0.114911	-0.141111	-0.0983788	-0.00599387	0.0561813	0.0817186	0.064261	0.0308488	-0.0165818	-0.0777907	-0.038678	-0.0228794	-0.0190891	-0.0195666	-0.0187843	-0.00132787	-0.00883397	-0.0197609	-0.0120126	-0.0394123	-0.0386109	-0.0444507	-0.0365822	-0.0423266	-0.0579413	-0.071687	-0.0812148	-0.131306	-0.127606	-0.100096	-0.0926285	-0.0788719	-0.0358784	-0.0594563	-0.027409	0.00610845	0.0506956	0.013054	-0.0340019	-0.0324999
424	0.0130214	-0.00133642	0.00621357	0.0475901	0.0872115	0.0700618	0.062827	-0.022294	0.0135885	0.046497	0.0449363	0.0289083	-0.0679785	-0.168316	-0.212499	-0.254743	-0.195564	-0.0527534	0.0951114	0.110708	0.151436	0.161905	0.152716	0.168591	0.172036	0.154837	0.146849	0.175355	0.184722	0.178767	0.178307	0.160077	0.110452	0.0894485	0.0983103	0.128941	0.0902785	0.0175094	-0.0183512	0.0136086	0.0123646	0.0141202	0.0394756	0.0498289	0.0205241	0.00265787	-0.0204885	-0.0360658	-0.0403629
425	0.0169896	0.00774474	-0.0101177	-0.00991133	-0.0378847	-0.0490685	-0.0541229	-0.0768478	-0.0705682	-0.0507954	-0.0369023	-0.0157751	-0.0205274	-0.0329363	-0.0518203	-0.0757634	-0.0785601	-0.0120252	0.0318562	0.0248709	0.0510648	0.085636	0.0728556	0.0448407	0.0722595	0.0839014	0.0567166	0.0696318	0.0304001	0.0105987	0.0228678	0.0132617	-0.0156375	-0.0246028	-0.0435744	-0.00880349	-0.0454124	-0.0803656	-0.0708885	-0.0520976	-0.0562562	-0.026129	-0.00555414	0.02226	0.0349776	0.0496085	0.00812722	-0.0388948	-0.0411662
426	0.0275696	0.00228973	-0.0741947	-0.0759528	-0.0789015	-0.0965006	-0.103292	-0.107159	-0.10775	-0.103057	-0.13197	-0.0966587	-0.0145032	-0.0303793	-0.110376	-0.148778	-0.196559	-0.0827002	0.0279592	0.0730144	0.0873833	0.1112	0.0935762	0.0547811	0.0682048	0.0811475	0.0569072	0.0509498	0.013653	-0.00405965	0.0190195	0.0454596	0.0246887	-0.000336472	-0.0561186	-0.0429213	-0.107166	-0.121405	-0.0778498	-0.102354	-0.0975119	-0.0724334	-0.0396743	-0.00911186	0.0175682	0.0468793	0.0131243	-0.0568821	-0.0621694
427	-0.00448097	-0.0300844	-0.0950228	-0.109397	-0.1211	-0.131001	-0.128407	-0.120594	-0.118942	-0.108619	-0.129855	-0.0878597	0.0029731	0.0064668	-0.0576513	-0.0819543	-0.128967	-0.0479285	0.0261639	0.0581393	0.0636199	0.0916142	0.0745163	0.0230512	0.0417456	0.0586249	0.0348842	0.0248635	-0.0239133	-0.0526991	-0.0410391	-0.0173298	-0.0337047	-0.0540067	-0.100964	-0.0853415	-0.130225	-0.130362	-0.0844496	-0.0996642	-0.0946473	-0.0645593	-0.033823	-0.00279364	0.0281905	0.0532931	0.0236437	-0.0421631	-0.0466944
428	-0.00363487	-0.0211379	-0.0861243	-0.103413	-0.146048	-0.1491	-0.142506	-0.0927401	-0.0914518	-0.0781243	-0.0837819	-0.0391144	0.0679304	0.100354	0.0438623	0.0346563	-0.0421829	0.0124644	0.0399048	0.0352783	0.0347873	0.0689161	0.047349	-0.0238764	-0.00154018	0.0158217	-0.0186007	-0.0350987	-0.0942731	-0.11855	-0.102305	-0.0792291	-0.0952281	-0.103325	-0.149775	-0.12347	-0.138897	-0.118164	-0.0380665	-0.0571034	-0.0535911	-0.015218	0.00680504	0.0285422	0.0718734	0.0879728	0.0662929	0.0141626	0.013919
429	-0.0589458	-0.0570269	-0.0946313	-0.122423	-0.174461	-0.166718	-0.159353	-0.103826	-0.101635	-0.0711282	-0.0515185	-0.00116988	0.0809953	0.126674	0.118778	0.120681	0.0603319	0.0677756	0.0490041	0.0326023	0.00989113	0.0368324	0.0297495	-0.0318134	-0.0162875	-0.00641255	-0.0328643	-0.0505389	-0.100126	-0.12251	-0.109579	-0.0887908	-0.0905097	-0.107758	-0.14794	-0.122268	-0.144151	-0.12924	-0.0556865	-0.055795	-0.0440236	-0.0019779	0.00875046	0.0279453	0.0700947	0.0854461	0.0513438	0.00952464	0.0178167
430	-0.0672135	-0.0572838	-0.103434	-0.149207	-0.186938	-0.169074	-0.150429	-0.0810774	-0.0722297	-0.0456065	-0.022227	0.0282879	0.119448	0.168495	0.154995	0.167771	0.0883648	0.0873581	0.0650173	0.034476	0.0185021	0.05728	0.0376213	-0.0307875	-0.00911393	-0.00789818	-0.044347	-0.0587759	-0.106284	-0.118978	-0.115573	-0.103175	-0.115702	-0.121732	-0.13669	-0.120374	-0.127268	-0.104524	-0.0319128	-0.024216	-0.00269283	0.0436451	0.058867	0.0713314	0.116252	0.120651	0.092144	0.059157	0.0696834
431	-0.0618535	-0.0674529	-0.102836	-0.145713	-0.188584	-0.164988	-0.146387	-0.0877951	-0.0810765	-0.0531865	-0.0293007	0.0224209	0.117463	0.153419	0.121392	0.137861	0.0623607	0.0864928	0.0751523	0.048057	0.0363099	0.0808849	0.0631888	-0.0145426	0.0172332	0.0324363	-0.0129016	-0.0350305	-0.0962978	-0.116877	-0.115558	-0.10718	-0.12308	-0.129206	-0.140885	-0.119947	-0.124866	-0.105071	-0.0391542	-0.0286099	-0.012656	0.0390904	0.0678668	0.0843276	0.133094	0.139943	0.115293	0.0702082	0.0741926
432	-0.0518361	-0.0617331	-0.100632	-0.150371	-0.197861	-0.17577	-0.155091	-0.123911	-0.119117	-0.0872024	-0.0610731	-0.00718179	0.0723505	0.113691	0.0925128	0.109633	0.0661493	0.073662	0.0635741	0.0444896	0.0203634	0.072086	0.0708254	-0.00850344	0.00266115	0.0368606	0.0119037	-0.0149412	-0.0683575	-0.10333	-0.112416	-0.0995076	-0.117327	-0.130733	-0.143294	-0.11994	-0.141315	-0.136381	-0.0965421	-0.0783372	-0.0596147	-0.00585443	0.0170851	0.0406761	0.0874836	0.103665	0.0669867	0.01912	0.0204002
433	-0.0465833	-0.0581758	-0.0691857	-0.116035	-0.145486	-0.122143	-0.094312	-0.0853712	-0.0779512	-0.0573837	-0.0408963	-0.004213	0.062425	0.0922907	0.050761	0.071409	0.0298068	0.0532232	0.0726746	0.0512508	0.0305138	0.0889665	0.0867276	0.00253401	0.0255021	0.0723344	0.0493712	0.0177225	-0.0435575	-0.0776109	-0.0814589	-0.0795895	-0.102942	-0.107389	-0.103685	-0.0807695	-0.0923622	-0.0851804	-0.061724	-0.0458264	-0.0280033	0.012304	0.0377594	0.0534059	0.0882821	0.0939423	0.0688591	0.034423	0.0319689
434	-0.0194936	-0.0345082	-0.0480483	-0.086685	-0.116197	-0.100184	-0.0773887	-0.0765162	-0.071957	-0.0471939	-0.0345985	-0.000219776	0.0679107	0.0790434	0.0302899	0.0408059	-0.00155443	0.0429674	0.0732354	0.0473695	0.0500226	0.110432	0.0986904	0.0259236	0.0606071	0.0959102	0.0646271	0.0439403	-0.0235726	-0.0543416	-0.0532833	-0.060334	-0.0931597	-0.0952891	-0.0919993	-0.0592427	-0.0700644	-0.076631	-0.0600859	-0.0333924	-0.0252323	0.0188508	0.0445965	0.059437	0.0944372	0.098887	0.0742378	0.0305409	0.0286633
435	-0.0103696	-0.0319984	-0.0442084	-0.0829382	-0.115167	-0.105166	-0.0781671	-0.0787316	-0.0715861	-0.0450954	-0.0297547	0.00847729	0.0778346	0.0791876	0.0216542	0.0293348	-0.00873257	0.0496584	0.0737818	0.0632891	0.069345	0.120817	0.106109	0.0350224	0.0580869	0.086995	0.0568296	0.037666	-0.0241634	-0.0550511	-0.0585939	-0.066222	-0.0976743	-0.105633	-0.104433	-0.0604688	-0.068924	-0.0766848	-0.0620644	-0.0340476	-0.0272947	0.0279603	0.0616135	0.0844833	0.120388	0.124367	0.099958	0.0503748	0.0428391
436	-0.0396194	-0.0567235	-0.0611246	-0.106894	-0.12718	-0.108094	-0.0727906	-0.0833822	-0.0669206	-0.0371366	-0.0192188	0.0254423	0.076322	0.079025	0.0288036	0.0395598	0.0171644	0.0674907	0.0992702	0.098236	0.0834579	0.136231	0.132168	0.054748	0.0656661	0.101176	0.0766661	0.0478018	-0.00238374	-0.0478225	-0.0604269	-0.0720157	-0.0986093	-0.108469	-0.0940741	-0.0632376	-0.0657607	-0.0704097	-0.05971	-0.02879	-0.0103063	0.0427407	0.07939	0.104014	0.141222	0.140812	0.110463	0.0664076	0.0582036
437	-0.0312943	-0.0449136	-0.0514633	-0.0972291	-0.113797	-0.0922615	-0.0637936	-0.083457	-0.0661167	-0.0338263	-0.0130227	0.0281302	0.0624759	0.0633446	0.0232033	0.0293195	0.0152553	0.0600367	0.100481	0.0863381	0.0816362	0.144812	0.141855	0.0674839	0.0883469	0.124471	0.0997829	0.074005	0.0210235	-0.0291886	-0.0399571	-0.0558917	-0.0901574	-0.0947847	-0.0721747	-0.0453698	-0.0486759	-0.0648936	-0.0625772	-0.0269286	-0.0132164	0.0347	0.0679606	0.0932927	0.122922	0.118503	0.084892	0.0472776	0.0368641
438	0.00675696	-0.0107667	-0.0117424	-0.0405691	-0.0612749	-0.0515183	-0.0217338	-0.0426617	-0.0294197	0.00349813	0.0226901	0.0412862	0.0663726	0.0484311	0.0115625	0.0167003	0.00335295	0.0638874	0.0902376	0.0693778	0.0906032	0.137074	0.123948	0.0671615	0.0888042	0.111605	0.0813676	0.066474	0.019414	-0.0133587	-0.0219283	-0.0427312	-0.0755621	-0.0753164	-0.054388	-0.0145237	-0.00917708	-0.0310466	-0.0342911	0.00877289	0.0131087	0.0606804	0.0896277	0.107906	0.128905	0.121155	0.0987111	0.0652367	0.0557213
439	0.000774134	-0.0183432	-0.0178245	-0.050718	-0.0648833	-0.0547889	-0.0278806	-0.0559363	-0.0340996	-0.00347027	0.0139651	0.0346448	0.0522072	0.0337927	-0.000989313	0.00267459	0.00467917	0.0604717	0.0859567	0.0805607	0.0877738	0.122514	0.117378	0.0672027	0.0655917	0.0908489	0.0684636	0.0512936	0.0172332	-0.0208921	-0.0327662	-0.0504114	-0.0729015	-0.076204	-0.0545576	-0.0214789	-0.0183078	-0.0381033	-0.0407188	-0.00520663	0.00207393	0.0479874	0.0790458	0.101254	0.120285	0.114821	0.0899927	0.0578873	0.0453208
440	-0.030867	-0.046859	-0.0415536	-0.078026	-0.0745481	-0.0535933	-0.0252722	-0.0580748	-0.0377789	-0.00608411	0.0145162	0.045271	0.0527403	0.0412556	0.00274815	-0.00173414	0.00121552	0.049372	0.0929509	0.0916505	0.0857214	0.126422	0.129413	0.0762188	0.0721605	0.0995886	0.0888555	0.0622809	0.0392124	-0.00676813	-0.0216958	-0.0395614	-0.0588781	-0.0675708	-0.0397251	-0.0207277	-0.0136451	-0.0329122	-0.0355514	-0.0011625	0.0104567	0.0504757	0.0795568	0.101097	0.117091	0.111116	0.0810666	0.054727	0.0445791
441	-0.046864	-0.0594131	-0.0638404	-0.0972567	-0.0896115	-0.070491	-0.0451309	-0.0671146	-0.0432313	-0.0175959	0.000129614	0.0464826	0.0645193	0.0520914	0.0181528	0.0150097	0.0197341	0.0557191	0.0901328	0.0971482	0.0748666	0.113056	0.113863	0.0599515	0.0579191	0.0830389	0.0715661	0.0548431	0.0280986	-0.00882406	-0.0216335	-0.0342451	-0.0498856	-0.0586184	-0.0403837	-0.0297424	-0.0333563	-0.0429461	-0.0392857	-0.0140097	0.00446976	0.0432383	0.0730447	0.0945937	0.11173	0.105808	0.0736425	0.0484914	0.04162
[truncated: 336 more columns]

## Sheet: apo_run2
Residue number	57	58	59	60	61	62	63	64	65	66	67	68	69	70	71	72	73	74	75	76	77	78	79	80	81	82	83	84	85	86	87	88	89	90	91	92	93	94	95	96	97	98	99	100	101	102	103	104	105
57	1	0.737971	0.554117	0.417388	0.297502	0.252348	0.198586	0.131636	0.0386349	0.00377237	-0.0764752	-0.0810821	-0.105487	-0.0631724	-0.0135478	-0.0406836	-0.0278753	0.00419562	0.00671281	0.0681451	0.0861737	0.038097	0.0671408	0.13624	0.118926	0.0775837	0.114059	0.144309	0.179771	0.219278	0.243543	0.228729	0.255173	0.29882	0.294463	0.244056	0.187396	0.158642	0.052979	0.0106202	-0.0643543	-0.111771	-0.132382	-0.148955	-0.177757	-0.17025	-0.186636	-0.183381	-0.160034
58	0.737971	1	0.822803	0.663624	0.538156	0.459213	0.391713	0.277956	0.137126	0.0887028	-0.0436682	-0.0612557	-0.107479	-0.0525223	0.0065939	-0.0342494	-0.00390676	0.0348995	0.0367567	0.131403	0.151508	0.0939485	0.132566	0.235457	0.212566	0.150685	0.207221	0.259576	0.316512	0.38238	0.413907	0.387381	0.442911	0.50115	0.502234	0.419346	0.369534	0.329277	0.161817	0.0979508	-0.0130777	-0.0909546	-0.137808	-0.175781	-0.228551	-0.232652	-0.25926	-0.242738	-0.211119
59	0.554117	0.822803	1	0.857845	0.728973	0.622471	0.532137	0.393413	0.227423	0.163307	0.00342815	-0.0291251	-0.0909756	-0.0366762	0.0307227	-0.0324591	0.00249715	0.0511716	0.0466667	0.149966	0.186543	0.122191	0.161004	0.283718	0.259157	0.180762	0.252247	0.320422	0.391819	0.476352	0.515215	0.478389	0.554409	0.625118	0.638406	0.528915	0.486784	0.447969	0.247577	0.170653	0.0384325	-0.0604689	-0.122968	-0.178088	-0.23305	-0.235815	-0.267902	-0.243627	-0.200375
60	0.417388	0.663624	0.857845	1	0.86169	0.717041	0.582799	0.429642	0.270145	0.194664	0.0397224	-0.0140313	-0.0849354	-0.0540809	-0.0127536	-0.086421	-0.0527881	0.00287708	-0.0155532	0.0729275	0.125654	0.0651586	0.0804371	0.200132	0.191564	0.103614	0.162165	0.242692	0.299316	0.406575	0.444699	0.394476	0.483631	0.566534	0.599156	0.482796	0.491017	0.447558	0.249792	0.166292	0.0533255	-0.0479153	-0.0925462	-0.144341	-0.18974	-0.184315	-0.200098	-0.176923	-0.137624
61	0.297502	0.538156	0.728973	0.86169	1	0.837696	0.678428	0.508789	0.360233	0.296693	0.166483	0.11365	0.0436355	0.0475813	0.0591744	-0.0124128	0.017459	0.057496	0.0524729	0.118892	0.165358	0.129199	0.137938	0.232228	0.243475	0.164204	0.216575	0.297144	0.33525	0.439952	0.477421	0.404822	0.459706	0.54307	0.631073	0.546374	0.58462	0.539428	0.337589	0.278729	0.178595	0.0939003	0.0448703	-0.0183096	-0.0701115	-0.0887344	-0.108695	-0.0703298	-0.0363625
62	0.252348	0.459213	0.622471	0.717041	0.837696	1	0.776134	0.566562	0.408298	0.340303	0.204287	0.159988	0.0866461	0.0879074	0.100413	0.0391774	0.0771415	0.109924	0.13192	0.196633	0.233213	0.215506	0.241508	0.320328	0.325083	0.264358	0.331796	0.402287	0.453463	0.540867	0.589599	0.518569	0.535028	0.609205	0.714208	0.672157	0.679301	0.628722	0.417065	0.346097	0.231594	0.150802	0.0869701	0.0154827	-0.0490176	-0.0835201	-0.110237	-0.0643736	-0.0316381
63	0.198586	0.391713	0.532137	0.582799	0.678428	0.776134	1	0.795139	0.588886	0.492678	0.352948	0.28359	0.211474	0.180284	0.168353	0.106003	0.15748	0.172754	0.184787	0.224602	0.27718	0.262139	0.263827	0.343685	0.351234	0.287543	0.340503	0.40257	0.442225	0.523448	0.552498	0.450566	0.444951	0.522014	0.66418	0.660326	0.744069	0.705832	0.535433	0.461227	0.377423	0.286206	0.22271	0.135768	0.0696573	0.0232978	-0.0052818	0.055485	0.0957101
64	0.131636	0.277956	0.393413	0.429642	0.508789	0.566562	0.795139	1	0.758723	0.59393	0.445094	0.362927	0.285227	0.233639	0.188147	0.128524	0.195316	0.2028	0.194347	0.213885	0.276326	0.268394	0.248075	0.313729	0.321187	0.252213	0.270722	0.312385	0.353689	0.429724	0.418482	0.338016	0.353136	0.410132	0.537229	0.493696	0.592541	0.68429	0.637002	0.526152	0.452496	0.357231	0.305291	0.21178	0.155982	0.109543	0.0835282	0.153002	0.198235
65	0.0386349	0.137126	0.227423	0.270145	0.360233	0.408298	0.588886	0.758723	1	0.801631	0.661219	0.553183	0.467604	0.369276	0.279532	0.225821	0.294212	0.283943	0.25986	0.218424	0.289754	0.30574	0.252015	0.279438	0.302675	0.244989	0.223943	0.24101	0.256716	0.323324	0.296971	0.19692	0.196378	0.250443	0.377691	0.386625	0.50965	0.623232	0.732287	0.643725	0.654756	0.553294	0.518653	0.415545	0.3549	0.283243	0.259581	0.354331	0.393379
66	0.00377237	0.0887028	0.163307	0.194664	0.296693	0.340303	0.492678	0.59393	0.801631	1	0.811214	0.687071	0.583152	0.460241	0.36295	0.309815	0.37509	0.375945	0.356771	0.312587	0.350187	0.370495	0.320728	0.325926	0.344227	0.295323	0.272665	0.282269	0.287464	0.338231	0.286268	0.19373	0.176036	0.214197	0.337928	0.356913	0.463702	0.575121	0.628269	0.740148	0.728816	0.645318	0.611533	0.490704	0.438713	0.364032	0.312426	0.394063	0.443509
67	-0.0764752	-0.0436682	0.00342815	0.0397224	0.166483	0.204287	0.352948	0.445094	0.661219	0.811214	1	0.827507	0.710676	0.555735	0.410366	0.366385	0.431403	0.414004	0.36953	0.276632	0.298038	0.319354	0.254066	0.225109	0.25306	0.21614	0.186818	0.190352	0.168917	0.204461	0.148405	0.0577806	0.0335186	0.0620688	0.183526	0.230336	0.342664	0.442974	0.540039	0.687983	0.769501	0.766223	0.766993	0.648382	0.615891	0.532913	0.477093	0.555098	0.593642
68	-0.0810821	-0.0612557	-0.0291251	-0.0140313	0.11365	0.159988	0.28359	0.362927	0.553183	0.687071	0.827507	1	0.848555	0.65259	0.494985	0.456634	0.496034	0.476429	0.438329	0.343273	0.34337	0.378134	0.325337	0.266147	0.286133	0.274733	0.242438	0.226143	0.199356	0.20979	0.149687	0.0697973	0.0352696	0.0456475	0.159272	0.213874	0.308202	0.399187	0.489234	0.645404	0.70849	0.774309	0.749575	0.63902	0.617015	0.540406	0.451347	0.507751	0.55263
69	-0.105487	-0.107479	-0.0909756	-0.0849354	0.0436355	0.0866461	0.211474	0.285227	0.467604	0.583152	0.710676	0.848555	1	0.822297	0.67479	0.609645	0.542002	0.535578	0.482658	0.355844	0.348918	0.400238	0.335319	0.249216	0.279793	0.281168	0.240773	0.209576	0.167492	0.165383	0.101942	0.0259648	-0.0219085	-0.0184703	0.0886549	0.152737	0.238011	0.322786	0.413715	0.571921	0.657482	0.761509	0.764691	0.681524	0.684842	0.611986	0.514192	0.554291	0.585461
70	-0.0631724	-0.0525223	-0.0366762	-0.0540809	0.0475813	0.0879074	0.180284	0.233639	0.369276	0.460241	0.555735	0.65259	0.822297	1	0.830323	0.714564	0.602018	0.566585	0.470225	0.361412	0.325202	0.375877	0.350389	0.278682	0.29082	0.297863	0.296428	0.258305	0.228283	0.206694	0.15078	0.0968138	0.0591318	0.0465667	0.123496	0.167769	0.218405	0.286993	0.346248	0.497761	0.542795	0.617269	0.592633	0.521968	0.518263	0.458995	0.370508	0.399794	0.424335
71	-0.0135478	0.0065939	0.0307227	-0.0127536	0.0591744	0.100413	0.168353	0.188147	0.279532	0.36295	0.410366	0.494985	0.67479	0.830323	1	0.841702	0.636509	0.653364	0.538354	0.451807	0.390462	0.432057	0.427209	0.361164	0.36902	0.376882	0.365389	0.326187	0.299248	0.268934	0.219688	0.176082	0.138411	0.127987	0.175041	0.208848	0.225714	0.27764	0.291467	0.438844	0.445961	0.494899	0.447887	0.386514	0.368685	0.314143	0.220032	0.246171	0.276652
72	-0.0406836	-0.0342494	-0.0324591	-0.086421	-0.0124128	0.0391774	0.106003	0.128524	0.225821	0.309815	0.366385	0.456634	0.609645	0.714564	0.841702	1	0.755663	0.654142	0.555844	0.440708	0.349949	0.406651	0.406532	0.335956	0.347167	0.366476	0.348769	0.311707	0.277057	0.225823	0.177843	0.154276	0.099142	0.072971	0.119681	0.167197	0.176742	0.225128	0.260484	0.406019	0.405617	0.467578	0.41655	0.367057	0.353105	0.292623	0.195501	0.21757	0.241467
73	-0.0278753	-0.00390676	0.00249715	-0.0527881	0.017459	0.0771415	0.15748	0.195316	0.294212	0.37509	0.431403	0.496034	0.542002	0.602018	0.636509	0.755663	1	0.777713	0.616142	0.495428	0.415601	0.435547	0.450758	0.395205	0.376575	0.38525	0.378619	0.337547	0.331874	0.286592	0.231448	0.198895	0.155402	0.117717	0.174583	0.225191	0.242225	0.306974	0.368088	0.471327	0.460176	0.48962	0.431796	0.36244	0.336162	0.27469	0.180016	0.210022	0.240116
74	0.00419562	0.0348995	0.0511716	0.00287708	0.057496	0.109924	0.172754	0.2028	0.283943	0.375945	0.414004	0.476429	0.535578	0.566585	0.653364	0.654142	0.777713	1	0.785877	0.651464	0.569729	0.563235	0.556414	0.468006	0.437756	0.437847	0.418151	0.352673	0.356804	0.319959	0.253318	0.223947	0.189001	0.160143	0.196489	0.231634	0.244676	0.305545	0.330262	0.469463	0.448059	0.468861	0.422999	0.344488	0.310816	0.253505	0.165801	0.204619	0.236614
75	0.00671281	0.0367567	0.0466667	-0.0155532	0.0524729	0.13192	0.184787	0.194347	0.25986	0.356771	0.36953	0.438329	0.482658	0.470225	0.538354	0.555844	0.616142	0.785877	1	0.822689	0.683746	0.715897	0.70642	0.577954	0.536788	0.548179	0.501464	0.411397	0.41903	0.371873	0.314122	0.276426	0.218226	0.194472	0.243427	0.297182	0.28915	0.345541	0.347021	0.482353	0.430916	0.450074	0.384728	0.313283	0.262038	0.18901	0.100039	0.144929	0.171097
76	0.0681451	0.131403	0.149966	0.0729275	0.118892	0.196633	0.224602	0.213885	0.218424	0.312587	0.276632	0.343273	0.355844	0.361412	0.451807	0.440708	0.495428	0.651464	0.822689	1	0.812345	0.704547	0.740145	0.694283	0.597509	0.583183	0.571914	0.496719	0.532976	0.482875	0.413639	0.378856	0.320833	0.287822	0.33115	0.368216	0.333446	0.374898	0.319745	0.445609	0.346172	0.339975	0.255572	0.190006	0.12984	0.060179	-0.0321522	0.0125807	0.0460324
77	0.0861737	0.151508	0.186543	0.125654	0.165358	0.233213	0.27718	0.276326	0.289754	0.350187	0.298038	0.34337	0.348918	0.325202	0.390462	0.349949	0.415601	0.569729	0.683746	0.812345	1	0.836343	0.727551	0.738307	0.680192	0.627601	0.55905	0.49739	0.529312	0.514974	0.429061	0.374603	0.323673	0.301905	0.351704	0.378803	0.36114	0.402123	0.361882	0.449971	0.371408	0.341725	0.27357	0.197724	0.139571	0.0756779	-0.00534699	0.0405469	0.0815208
78	0.038097	0.0939485	0.122191	0.0651586	0.129199	0.215506	0.262139	0.268394	0.30574	0.370495	0.319354	0.378134	0.400238	0.375877	0.432057	0.406651	0.435547	0.563235	0.715897	0.704547	0.836343	1	0.864456	0.75112	0.775619	0.764575	0.623102	0.536551	0.531417	0.48822	0.416598	0.379609	0.312839	0.285913	0.332045	0.37894	0.37371	0.419407	0.406307	0.502523	0.417882	0.404458	0.329377	0.258616	0.192134	0.11763	0.028369	0.0782584	0.116933
79	0.0671408	0.132566	0.161004	0.0804371	0.137938	0.241508	0.263827	0.248075	0.252015	0.320728	0.254066	0.325337	0.335319	0.350389	0.427209	0.406532	0.450758	0.556414	0.70642	0.740145	0.727551	0.864456	1	0.848818	0.783639	0.817819	0.754907	0.62844	0.639947	0.554127	0.492984	0.468149	0.397373	0.351196	0.388045	0.436678	0.403365	0.443062	0.390943	0.481972	0.363847	0.346093	0.248769	0.183093	0.103625	0.0263281	-0.0719344	-0.0215847	0.0141002
80	0.13624	0.235457	0.283718	0.200132	0.232228	0.320328	0.343685	0.313729	0.279438	0.325926	0.225109	0.266147	0.249216	0.278682	0.361164	0.335956	0.395205	0.468006	0.577954	0.694283	0.738307	0.75112	0.848818	1	0.865106	0.793116	0.768505	0.708257	0.755071	0.68182	0.597777	0.56785	0.494157	0.441408	0.483877	0.506926	0.461412	0.488922	0.398448	0.461927	0.324544	0.270343	0.167493	0.0898295	0.00217444	-0.0701695	-0.160266	-0.106851	-0.0634015
81	0.118926	0.212566	0.259157	0.191564	0.243475	0.325083	0.351234	0.321187	0.302675	0.344227	0.25306	0.286133	0.279793	0.29082	0.36902	0.347167	0.376575	0.437756	0.536788	0.597509	0.680192	0.775619	0.783639	0.865106	1	0.881127	0.750993	0.729135	0.703884	0.652753	0.574046	0.535676	0.461109	0.422577	0.464291	0.495287	0.470942	0.489378	0.41504	0.487712	0.354322	0.311054	0.215625	0.138934	0.0544726	-0.0188043	-0.10895	-0.0547631	-0.0106189
82	0.0775837	0.150685	0.180762	0.103614	0.164204	0.264358	0.287543	0.252213	0.244989	0.295323	0.21614	0.274733	0.281168	0.297863	0.376882	0.366476	0.38525	0.437847	0.548179	0.583183	0.627601	0.764575	0.817819	0.793116	0.881127	1	0.850468	0.737786	0.669501	0.583137	0.533632	0.509087	0.41553	0.371792	0.403458	0.456614	0.421692	0.439614	0.383741	0.454167	0.326983	0.305588	0.204207	0.140497	0.0594257	-0.0105405	-0.101747	-0.0557795	-0.0185488
83	0.114059	0.207221	0.252247	0.162165	0.216575	0.331796	0.340503	0.270722	0.223943	0.272665	0.186818	0.242438	0.240773	0.296428	0.365389	0.348769	0.378619	0.418151	0.501464	0.571914	0.55905	0.623102	0.754907	0.768505	0.750993	0.850468	1	0.847989	0.801828	0.683651	0.644894	0.613257	0.503515	0.450545	0.493689	0.540795	0.465177	0.466197	0.354867	0.422061	0.290873	0.261053	0.146812	0.0789068	-0.00593261	-0.0684856	-0.153376	-0.11033	-0.0762495
84	0.144309	0.259576	0.320422	0.242692	0.297144	0.402287	0.40257	0.312385	0.24101	0.282269	0.190352	0.226143	0.209576	0.258305	0.326187	0.311707	0.337547	0.352673	0.411397	0.496719	0.49739	0.536551	0.62844	0.708257	0.729135	0.737786	0.847989	1	0.857919	0.762664	0.720333	0.676441	0.564418	0.518369	0.566607	0.592932	0.526161	0.49746	0.344263	0.411741	0.283881	0.240574	0.138376	0.0695979	-0.0147382	-0.0748683	-0.156605	-0.111005	-0.0785347
85	0.179771	0.316512	0.391819	0.299316	0.33525	0.453463	0.442225	0.353689	0.256716	0.287464	0.168917	0.199356	0.167492	0.228283	0.299248	0.277057	0.331874	0.356804	0.41903	0.532976	0.529312	0.531417	0.639947	0.755071	0.703884	0.669501	0.801828	0.857919	1	0.883199	0.801077	0.773949	0.677805	0.612032	0.658452	0.652159	0.563279	0.552093	0.379068	0.414773	0.264435	0.198201	0.0898783	0.0181138	-0.0773459	-0.143994	-0.226353	-0.175078	-0.142216
86	0.219278	0.38238	0.476352	0.406575	0.439952	0.540867	0.523448	0.429724	0.323324	0.338231	0.204461	0.20979	0.165383	0.206694	0.268934	0.225823	0.286592	0.319959	0.371873	0.482875	0.514974	0.48822	0.554127	0.68182	0.652753	0.583137	0.683651	0.762664	0.883199	1	0.891612	0.797759	0.737519	0.709215	0.763182	0.726548	0.647693	0.634893	0.434975	0.444421	0.289196	0.208249	0.110848	0.0349681	-0.0578038	-0.121152	-0.198505	-0.144832	-0.104171
87	0.243543	0.413907	0.515215	0.444699	0.477421	0.589599	0.552498	0.418482	0.296971	0.286268	0.148405	0.149687	0.101942	0.15078	0.219688	0.177843	0.231448	0.253318	0.314122	0.413639	0.429061	0.416598	0.492984	0.597777	0.574046	0.533632	0.644894	0.720333	0.801077	0.891612	1	0.870866	0.774386	0.779307	0.813009	0.801077	0.691842	0.636973	0.428693	0.394274	0.239106	0.156022	0.0577414	-0.0136366	-0.107055	-0.163031	-0.232294	-0.184442	-0.146246
88	0.228729	0.387381	0.478389	0.394476	0.404822	0.518569	0.450566	0.338016	0.19692	0.19373	0.0577806	0.0697973	0.0259648	0.0968138	0.176082	0.154276	0.198895	0.223947	0.276426	0.378856	0.374603	0.379609	0.468149	0.56785	0.535676	0.509087	0.613257	0.676441	0.773949	0.797759	0.870866	1	0.868788	0.784449	0.726551	0.675884	0.55894	0.516374	0.345431	0.304939	0.142694	0.0610441	-0.034393	-0.0952497	-0.181108	-0.22684	-0.295933	-0.257365	-0.221252
89	0.255173	0.442911	0.554409	0.483631	0.459706	0.535028	0.444951	0.353136	0.196378	0.176036	0.0335186	0.0352696	-0.0219085	0.0591318	0.138411	0.099142	0.155402	0.189001	0.218226	0.320833	0.323673	0.312839	0.397373	0.494157	0.461109	0.41553	0.503515	0.564418	0.677805	0.737519	0.774386	0.868788	1	0.879957	0.751101	0.621264	0.530151	0.504414	0.338384	0.270413	0.105864	0.0125816	-0.0741248	-0.132559	-0.214034	-0.250311	-0.312524	-0.277965	-0.239776
90	0.29882	0.50115	0.625118	0.566534	0.54307	0.609205	0.522014	0.410132	0.250443	0.214197	0.0620688	0.0456475	-0.0184703	0.0465667	0.127987	0.072971	0.117717	0.160143	0.194472	0.287822	0.301905	0.285913	0.351196	0.441408	0.422577	0.371792	0.450545	0.518369	0.612032	0.709215	0.779307	0.784449	0.879957	1	0.856925	0.715395	0.615983	0.574136	0.381973	0.294524	0.128585	0.0320418	-0.0534168	-0.113727	-0.19799	-0.23248	-0.289366	-0.252871	-0.210519
91	0.294463	0.502234	0.638406	0.599156	0.631073	0.714208	0.66418	0.537229	0.377691	0.337928	0.183526	0.159272	0.0886549	0.123496	0.175041	0.119681	0.174583	0.196489	0.243427	0.33115	0.351704	0.332045	0.388045	0.483877	0.464291	0.403458	0.493689	0.566607	0.658452	0.763182	0.813009	0.726551	0.751101	0.856925	1	0.871658	0.762866	0.72638	0.486931	0.409911	0.253543	0.155433	0.0637256	-0.0116923	-0.104911	-0.158355	-0.214144	-0.162177	-0.121177
92	0.244056	0.419346	0.528915	0.482796	0.546374	0.672157	0.660326	0.493696	0.386625	0.356913	0.230336	0.213874	0.152737	0.167769	0.208848	0.167197	0.225191	0.231634	0.297182	0.368216	0.378803	0.37894	0.436678	0.506926	0.495287	0.456614	0.540795	0.592932	0.652159	0.726548	0.801077	0.675884	0.621264	0.715395	0.871658	1	0.834479	0.748877	0.519446	0.459722	0.316387	0.234614	0.135069	0.056158	-0.0366591	-0.103262	-0.161155	-0.103826	-0.07055
93	0.187396	0.369534	0.486784	0.491017	0.58462	0.679301	0.744069	0.592541	0.50965	0.463702	0.342664	0.308202	0.238011	0.218405	0.225714	0.176742	0.242225	0.244676	0.28915	0.333446	0.36114	0.37371	0.403365	0.461412	0.470942	0.421692	0.465177	0.526161	0.563279	0.647693	0.691842	0.55894	0.530151	0.615983	0.762866	0.834479	1	0.875345	0.631368	0.564234	0.430326	0.340113	0.246145	0.157437	0.0671647	-0.0088509	-0.061702	0.00810139	0.0420912
94	0.158642	0.329277	0.447969	0.447558	0.539428	0.628722	0.705832	0.68429	0.623232	0.575121	0.442974	0.399187	0.322786	0.286993	0.27764	0.225128	0.306974	0.305545	0.345541	0.374898	0.402123	0.419407	0.443062	0.488922	0.489378	0.439614	0.466197	0.49746	0.552093	0.634893	0.636973	0.516374	0.504414	0.574136	0.72638	0.748877	0.875345	1	0.782082	0.677666	0.529518	0.430383	0.334642	0.235876	0.141994	0.0564315	-0.00149648	0.0782581	0.117653
95	0.052979	0.161817	0.247577	0.249792	0.337589	0.417065	0.535433	0.637002	0.732287	0.628269	0.540039	0.489234	0.413715	0.346248	0.291467	0.260484	0.368088	0.330262	0.347021	0.319745	0.361882	0.406307	0.390943	0.398448	0.41504	0.383741	0.354867	0.344263	0.379068	0.434975	0.428693	0.345431	0.338384	0.381973	0.486931	0.519446	0.631368	0.782082	1	0.764187	0.638842	0.535981	0.448468	0.349185	0.265354	0.171235	0.121252	0.208919	0.242163
96	0.0106202	0.0979508	0.170653	0.166292	0.278729	0.346097	0.461227	0.526152	0.643725	0.740148	0.687983	0.645404	0.571921	0.497761	0.438844	0.406019	0.471327	0.469463	0.482353	0.445609	0.449971	0.502523	0.481972	0.461927	0.487712	0.454167	0.422061	0.411741	0.414773	0.444421	0.394274	0.304939	0.270413	0.294524	0.409911	0.459722	0.564234	0.677666	0.764187	1	0.83827	0.719289	0.597414	0.466161	0.390055	0.273076	0.2005	0.298114	0.331675
97	-0.0643543	-0.0130777	0.0384325	0.0533255	0.178595	0.231594	0.377423	0.452496	0.654756	0.728816	0.769501	0.70849	0.657482	0.542795	0.445961	0.405617	0.460176	0.448059	0.430916	0.346172	0.371408	0.417882	0.363847	0.324544	0.354322	0.326983	0.290873	0.283881	0.264435	0.289196	0.239106	0.142694	0.105864	0.128585	0.253543	0.316387	0.430326	0.529518	0.638842	0.83827	1	0.855946	0.731825	0.590391	0.533663	0.416741	0.358097	0.456797	0.479073
98	-0.111771	-0.0909546	-0.0604689	-0.0479153	0.0939003	0.150802	0.286206	0.357231	0.553294	0.645318	0.766223	0.774309	0.761509	0.617269	0.494899	0.467578	0.48962	0.468861	0.450074	0.339975	0.341725	0.404458	0.346093	0.270343	0.311054	0.305588	0.261053	0.240574	0.198201	0.208249	0.156022	0.0610441	0.0125816	0.0320418	0.155433	0.234614	0.340113	0.430383	0.535981	0.719289	0.855946	1	0.851023	0.701261	0.650727	0.5363	0.459615	0.545849	0.573729
99	-0.132382	-0.137808	-0.122968	-0.0925462	0.0448703	0.0869701	0.22271	0.305291	0.518653	0.611533	0.766993	0.749575	0.764691	0.592633	0.447887	0.41655	0.431796	0.422999	0.384728	0.255572	0.27357	0.329377	0.248769	0.167493	0.215625	0.204207	0.146812	0.138376	0.0898783	0.110848	0.0577414	-0.034393	-0.0741248	-0.0534168	0.0637256	0.135069	0.246145	0.334642	0.448468	0.597414	0.731825	0.851023	1	0.870638	0.805135	0.688701	0.631602	0.708744	0.727013
100	-0.148955	-0.175781	-0.178088	-0.144341	-0.0183096	0.0154827	0.135768	0.21178	0.415545	0.490704	0.648382	0.63902	0.681524	0.521968	0.386514	0.367057	0.36244	0.344488	0.313283	0.190006	0.197724	0.258616	0.183093	0.0898295	0.138934	0.140497	0.0789068	0.0695979	0.0181138	0.0349681	-0.0136366	-0.0952497	-0.132559	-0.113727	-0.0116923	0.056158	0.157437	0.235876	0.349185	0.466161	0.590391	0.701261	0.870638	1	0.869505	0.712811	0.666616	0.748067	0.70624
101	-0.177757	-0.228551	-0.23305	-0.18974	-0.0701115	-0.0490176	0.0696573	0.155982	0.3549	0.438713	0.615891	0.617015	0.684842	0.518263	0.368685	0.353105	0.336162	0.310816	0.262038	0.12984	0.139571	0.192134	0.103625	0.00217444	0.0544726	0.0594257	-0.00593261	-0.0147382	-0.0773459	-0.0578038	-0.107055	-0.181108	-0.214034	-0.19799	-0.104911	-0.0366591	0.0671647	0.141994	0.265354	0.390055	0.533663	0.650727	0.805135	0.869505	1	0.90499	0.83115	0.844838	0.822269
102	-0.17025	-0.232652	-0.235815	-0.184315	-0.0887344	-0.0835201	0.0232978	0.109543	0.283243	0.364032	0.532913	0.540406	0.611986	0.458995	0.314143	0.292623	0.27469	0.253505	0.18901	0.060179	0.0756779	0.11763	0.0263281	-0.0701695	-0.0188043	-0.0105405	-0.0684856	-0.0748683	-0.143994	-0.121152	-0.163031	-0.22684	-0.250311	-0.23248	-0.158355	-0.103262	-0.0088509	0.0564315	0.171235	0.273076	0.416741	0.5363	0.688701	0.712811	0.90499	1	0.901768	0.824661	0.855065
103	-0.186636	-0.25926	-0.267902	-0.200098	-0.108695	-0.110237	-0.0052818	0.0835282	0.259581	0.312426	0.477093	0.451347	0.514192	0.370508	0.220032	0.195501	0.180016	0.165801	0.100039	-0.0321522	-0.00534699	0.028369	-0.0719344	-0.160266	-0.10895	-0.101747	-0.153376	-0.156605	-0.226353	-0.198505	-0.232294	-0.295933	-0.312524	-0.289366	-0.214144	-0.161155	-0.061702	-0.00149648	0.121252	0.2005	0.358097	0.459615	0.631602	0.666616	0.83115	0.901768	1	0.913422	0.855443
104	-0.183381	-0.242738	-0.243627	-0.176923	-0.0703298	-0.0643736	0.055485	0.153002	0.354331	0.394063	0.555098	0.507751	0.554291	0.399794	0.246171	0.21757	0.210022	0.204619	0.144929	0.0125807	0.0405469	0.0782584	-0.0215847	-0.106851	-0.0547631	-0.0557795	-0.11033	-0.111005	-0.175078	-0.144832	-0.184442	-0.257365	-0.277965	-0.252871	-0.162177	-0.103826	0.00810139	0.0782581	0.208919	0.298114	0.456797	0.545849	0.708744	0.748067	0.844838	0.824661	0.913422	1	0.907034
105	-0.160034	-0.211119	-0.200375	-0.137624	-0.0363625	-0.0316381	0.0957101	0.198235	0.393379	0.443509	0.593642	0.55263	0.585461	0.424335	0.276652	0.241467	0.240116	0.236614	0.171097	0.0460324	0.0815208	0.116933	0.0141002	-0.0634015	-0.0106189	-0.0185488	-0.0762495	-0.0785347	-0.142216	-0.104171	-0.146246	-0.221252	-0.239776	-0.210519	-0.121177	-0.07055	0.0420912	0.117653	0.242163	0.331675	0.479073	0.573729	0.727013	0.70624	0.822269	0.855065	0.855443	0.907034	1
106	-0.164078	-0.228605	-0.224359	-0.151286	-0.0809779	-0.0970013	0.0137674	0.112554	0.269487	0.300176	0.434778	0.384189	0.411765	0.270338	0.132931	0.0936172	0.0943594	0.0993917	0.0236749	-0.0965797	-0.0506341	-0.028872	-0.136486	-0.19984	-0.1496	-0.15093	-0.195468	-0.19634	-0.262063	-0.2222	-0.249616	-0.307261	-0.308902	-0.279019	-0.214922	-0.184876	-0.0828121	-0.0203309	0.096219	0.146373	0.297891	0.381468	0.542753	0.531923	0.683076	0.797475	0.862861	0.820471	0.8819
107	-0.172428	-0.233501	-0.227427	-0.144884	-0.0634915	-0.0730071	0.0462496	0.148052	0.323632	0.327728	0.458637	0.382131	0.397702	0.255994	0.110767	0.0726971	0.080576	0.0837024	0.0228949	-0.100637	-0.0542867	-0.0281258	-0.135245	-0.19886	-0.143133	-0.148956	-0.199634	-0.192912	-0.257862	-0.217243	-0.242714	-0.308869	-0.313618	-0.278689	-0.200286	-0.159031	-0.0476224	0.0161289	0.141757	0.18135	0.338973	0.401722	0.560906	0.564924	0.669519	0.725798	0.837029	0.857979	0.841688
108	-0.129589	-0.153191	-0.127267	-0.0519992	0.0402699	0.0423663	0.175191	0.282761	0.47538	0.464551	0.574271	0.481215	0.467077	0.333454	0.190362	0.134929	0.168808	0.175898	0.112433	0.000229042	0.0563413	0.0753552	-0.030037	-0.070949	-0.0207221	-0.0473341	-0.0920572	-0.0775911	-0.127446	-0.0839504	-0.114693	-0.192931	-0.197789	-0.158795	-0.0617993	-0.0235389	0.0957133	0.167624	0.292452	0.332392	0.471671	0.500802	0.640345	0.600883	0.650695	0.657237	0.740818	0.817578	0.819504
109	-0.0871572	-0.110061	-0.0752784	-0.000184227	0.047787	0.0305086	0.149133	0.251407	0.392544	0.367403	0.429528	0.340199	0.319395	0.208487	0.104256	0.025283	0.0482922	0.0836334	0.0095151	-0.0694548	0.00219643	-0.00168104	-0.10565	-0.116425	-0.0725646	-0.102049	-0.143421	-0.132458	-0.169623	-0.117714	-0.139417	-0.195879	-0.181624	-0.139097	-0.0728714	-0.0660377	0.036563	0.099892	0.191298	0.196757	0.306164	0.311932	0.449637	0.408163	0.488105	0.560042	0.632803	0.65622	0.720159
110	-0.128478	-0.185732	-0.174858	-0.08447	-0.050228	-0.0791337	0.0193133	0.11801	0.247408	0.210511	0.293011	0.202945	0.192485	0.0846949	-0.0267368	-0.0817264	-0.0794001	-0.0489623	-0.128627	-0.212285	-0.145693	-0.150291	-0.253922	-0.282134	-0.234831	-0.236984	-0.270584	-0.27276	-0.322062	-0.270365	-0.282504	-0.327401	-0.307605	-0.267476	-0.22022	-0.21007	-0.114321	-0.0643689	0.038746	0.0239852	0.161598	0.184586	0.332936	0.33173	0.433525	0.524271	0.629346	0.623804	0.649757
111	-0.109244	-0.134219	-0.114363	-0.0295926	0.0311995	0.0275309	0.137865	0.23105	0.397801	0.329205	0.401094	0.293663	0.269393	0.149695	0.0308124	-0.0174702	0.0124933	0.0277719	-0.0164838	-0.102063	-0.0279683	-0.0224998	-0.128342	-0.15106	-0.101884	-0.125508	-0.170618	-0.156998	-0.200791	-0.151785	-0.16505	-0.233978	-0.226171	-0.17812	-0.0995275	-0.0681704	0.0392452	0.0960011	0.210744	0.185675	0.321387	0.316784	0.437464	0.419958	0.468291	0.492508	0.597596	0.651833	0.641809
112	-0.0453535	-0.0290965	0.015825	0.0946354	0.143546	0.136442	0.249238	0.341624	0.493769	0.404336	0.444268	0.324992	0.270068	0.182372	0.0648481	-0.00630007	0.0655603	0.0827284	0.00819055	-0.0549937	0.0273034	0.00573717	-0.0855291	-0.0736863	-0.0403796	-0.0852852	-0.10103	-0.0775413	-0.0966954	-0.0381137	-0.0553504	-0.120459	-0.0906134	-0.0463402	0.0310274	0.0323446	0.14068	0.205359	0.311549	0.268414	0.371756	0.328366	0.415844	0.369199	0.384356	0.387174	0.465961	0.535054	0.541457
113	-0.0258049	0.00551974	0.056398	0.126114	0.182296	0.189532	0.29361	0.365139	0.533248	0.411607	0.426247	0.30911	0.25042	0.157085	0.0688036	0.00664263	0.0408062	0.0613805	0.0142872	-0.0342648	0.0554003	0.0488626	-0.0288651	-0.0129497	0.0222989	-0.0223967	-0.0485308	-0.0230429	-0.0355173	0.0225361	0.0162643	-0.0574422	-0.0413035	0.00902232	0.0949622	0.105723	0.207026	0.266404	0.362649	0.313161	0.396289	0.335584	0.380115	0.33055	0.308299	0.271671	0.330446	0.424574	0.423064
114	-0.0108576	0.0124914	0.0531034	0.111146	0.138418	0.130436	0.195509	0.246024	0.362214	0.244408	0.237545	0.13598	0.0825352	0.0260001	-0.0224591	-0.0871651	-0.082991	-0.034518	-0.0800546	-0.100465	-0.0106825	-0.0304603	-0.100274	-0.0763912	-0.0483002	-0.0876178	-0.103009	-0.0788882	-0.0881255	-0.0348186	-0.0310024	-0.0818179	-0.0521551	-0.0103566	0.0426677	0.036797	0.11483	0.152039	0.213514	0.16204	0.224445	0.156884	0.194807	0.165836	0.149593	0.132697	0.204523	0.280553	0.269187
115	-0.0400118	-0.0235068	0.00971792	0.065072	0.10287	0.0943955	0.168422	0.230204	0.360129	0.260943	0.281242	0.186562	0.146827	0.0950482	0.0409764	-0.0430312	-0.0196341	0.0400217	-0.0327624	-0.076434	0.00994541	-0.0108055	-0.0914434	-0.0816191	-0.0565778	-0.093852	-0.105495	-0.0897441	-0.103141	-0.0560485	-0.0624943	-0.109966	-0.0763528	-0.0389268	0.00701794	0.0038364	0.0904023	0.134018	0.213607	0.169201	0.255873	0.206153	0.273231	0.246522	0.247559	0.240491	0.325539	0.399774	0.385887
116	-0.0708682	-0.0661226	-0.0427656	0.0092177	0.0691694	0.0773244	0.169984	0.241822	0.411148	0.321745	0.368185	0.285856	0.255665	0.172504	0.0967442	0.0398306	0.0498957	0.0812288	0.0297061	-0.0388928	0.0364646	0.0437462	-0.0319264	-0.0472616	-0.0176009	-0.0437222	-0.068746	-0.0628336	-0.0839918	-0.048061	-0.0577864	-0.114283	-0.104136	-0.0677397	-0.0049452	0.0171608	0.112597	0.16705	0.273869	0.245006	0.344186	0.31705	0.376473	0.350081	0.348709	0.319125	0.386735	0.472029	0.455787
117	-0.087108	-0.084496	-0.054501	0.0154696	0.0921885	0.0998269	0.223746	0.324573	0.520308	0.441084	0.505114	0.403528	0.366932	0.257586	0.141217	0.077661	0.114202	0.130137	0.0638669	-0.0200495	0.0517513	0.0576703	-0.032309	-0.0509439	-0.0133733	-0.0470011	-0.0756771	-0.0646103	-0.0926873	-0.0471072	-0.0678616	-0.137506	-0.127675	-0.0845302	-0.00292234	0.0230113	0.14042	0.212598	0.343089	0.327134	0.445185	0.425994	0.511637	0.46863	0.487155	0.469399	0.539571	0.621721	0.621507
118	-0.0537921	-0.0319747	0.0202113	0.0960129	0.178997	0.191929	0.333518	0.448049	0.646177	0.577732	0.625147	0.511843	0.456408	0.326532	0.201234	0.135405	0.186	0.190353	0.124961	0.0471025	0.122182	0.126901	0.0377033	0.0267241	0.0678062	0.0222548	-0.015755	0.00653194	-0.0147755	0.0454666	0.0195797	-0.0677245	-0.0552364	-0.00570785	0.0963717	0.113485	0.242929	0.330421	0.459901	0.446927	0.547264	0.518656	0.583595	0.517276	0.519768	0.490341	0.523628	0.61111	0.636373
119	0.0328526	0.0861247	0.163914	0.242235	0.27817	0.278104	0.400742	0.5118	0.630225	0.566071	0.527491	0.406784	0.32935	0.227501	0.116086	0.0480033	0.115917	0.125294	0.0510565	0.0193499	0.108406	0.0811227	0.00552397	0.0412226	0.067818	0.00659565	-0.0120963	0.0288855	0.0282771	0.106134	0.0819754	2.16195e-05	0.0388502	0.0965251	0.184305	0.163169	0.273184	0.356135	0.426419	0.383662	0.429161	0.367565	0.411878	0.340037	0.343428	0.342356	0.354994	0.411948	0.461784
120	0.00638719	0.0459806	0.112813	0.174772	0.208422	0.194951	0.287893	0.375662	0.487595	0.531023	0.537701	0.445825	0.362497	0.266158	0.166349	0.0952053	0.131456	0.152874	0.0733691	0.0476186	0.106142	0.079628	0.0166569	0.036078	0.0572487	0.0119341	-0.0018476	0.0181743	0.0125054	0.0770458	0.045512	-0.0146461	0.0165328	0.0576509	0.126881	0.0990208	0.189396	0.267983	0.317263	0.352536	0.390716	0.36075	0.392521	0.316028	0.3433	0.370586	0.359428	0.387049	0.464564
121	-0.0702432	-0.0587	-0.0171377	0.0278494	0.109126	0.118742	0.23818	0.342032	0.49012	0.592651	0.679259	0.643644	0.566899	0.435832	0.301843	0.259885	0.302343	0.302041	0.227789	0.163722	0.170414	0.172823	0.117313	0.0831633	0.102657	0.0726555	0.055133	0.0642512	0.0439765	0.0816397	0.031746	-0.0332494	-0.0324991	-0.0100419	0.0709384	0.0832591	0.179526	0.267032	0.348976	0.464823	0.528125	0.544921	0.575442	0.496413	0.524228	0.519952	0.476173	0.50279	0.5587
122	-0.0728406	-0.0657726	-0.0445823	-0.0349504	0.0407628	0.0546143	0.159619	0.25144	0.375008	0.497534	0.587132	0.601524	0.596036	0.511455	0.440555	0.405833	0.43143	0.453997	0.3524	0.282442	0.236282	0.242513	0.220962	0.166125	0.175733	0.155453	0.146087	0.136534	0.120255	0.117309	0.0515586	0.0072503	-0.0017693	-0.00744325	0.0530683	0.0674824	0.139484	0.214005	0.276927	0.431112	0.473881	0.511587	0.525215	0.458233	0.475345	0.464587	0.388211	0.403142	0.453355
123	-0.118377	-0.158145	-0.155315	-0.128575	-0.055852	-0.0577325	0.036471	0.125737	0.237442	0.344401	0.455972	0.467125	0.502818	0.387873	0.30747	0.27484	0.288099	0.319842	0.233647	0.158899	0.131765	0.12463	0.0740092	0.00813955	0.0281991	0.0156698	-0.00914525	-0.0189647	-0.047458	-0.0447003	-0.111728	-0.143538	-0.141145	-0.150934	-0.104222	-0.0859114	-0.00974115	0.0540407	0.128308	0.271165	0.347451	0.422361	0.474853	0.437695	0.489036	0.496292	0.435558	0.432037	0.469551
124	-0.134772	-0.194471	-0.204113	-0.186862	-0.120122	-0.123302	-0.0329648	0.0540198	0.15411	0.259786	0.376332	0.403328	0.450511	0.344007	0.274503	0.246703	0.267913	0.28554	0.204037	0.133879	0.0902979	0.0849764	0.0463889	-0.0307143	-0.0144609	-0.0134657	-0.038965	-0.0582707	-0.0942289	-0.104017	-0.169175	-0.190695	-0.185657	-0.204168	-0.168081	-0.144987	-0.0748688	-0.0143228	0.0575744	0.196209	0.275461	0.355868	0.41521	0.403772	0.468403	0.48717	0.430476	0.407466	0.434042
125	-0.11796	-0.182177	-0.19847	-0.186647	-0.149693	-0.163351	-0.0945067	-0.0104455	0.0624257	0.147755	0.243024	0.275351	0.311679	0.220422	0.159485	0.1455	0.219036	0.214447	0.137174	0.0729433	0.043847	0.0547553	0.0161871	-0.0628337	-0.0451129	-0.0317304	-0.0699894	-0.101145	-0.130801	-0.142037	-0.195644	-0.203507	-0.191041	-0.212335	-0.202283	-0.188596	-0.134424	-0.0793357	-0.0103391	0.0861805	0.147927	0.219686	0.271866	0.264882	0.346566	0.39098	0.33797	0.290878	0.332111
126	-0.119505	-0.202234	-0.21808	-0.184995	-0.158234	-0.188115	-0.12834	-0.0505218	0.0289229	0.0993024	0.190103	0.207947	0.23182	0.118103	0.0545013	0.0396985	0.106589	0.109713	0.0578481	0.00156281	-0.0132501	-0.0147417	-0.0609704	-0.140963	-0.11863	-0.0977345	-0.146604	-0.174646	-0.216693	-0.215247	-0.256245	-0.278836	-0.256341	-0.264055	-0.250668	-0.235126	-0.176045	-0.126415	-0.0573809	0.0133308	0.0915328	0.161586	0.227135	0.232955	0.324535	0.38291	0.371942	0.321283	0.347106
127	-0.149272	-0.232877	-0.242219	-0.188808	-0.145593	-0.176515	-0.100734	-0.00181661	0.106938	0.171477	0.288209	0.28626	0.301481	0.163349	0.0640913	0.0487178	0.109477	0.11929	0.0515961	-0.0269679	-0.0253828	-0.0230539	-0.0908511	-0.175661	-0.142963	-0.128356	-0.178623	-0.196784	-0.247968	-0.237391	-0.283852	-0.313946	-0.288637	-0.290369	-0.266949	-0.248198	-0.163679	-0.103855	-0.00509358	0.0696876	0.180136	0.254531	0.34309	0.346714	0.434923	0.479299	0.487395	0.450892	0.463715
128	-0.108657	-0.180058	-0.185997	-0.12963	-0.120246	-0.168847	-0.12416	-0.0408962	0.0456481	0.0919132	0.177872	0.16448	0.163783	0.0331869	-0.0466681	-0.0519329	-0.00712357	0.00950149	-0.0473702	-0.100868	-0.0789011	-0.096308	-0.161857	-0.219202	-0.189981	-0.190876	-0.232725	-0.236952	-0.278867	-0.258127	-0.292751	-0.319134	-0.283021	-0.273652	-0.264869	-0.26431	-0.198376	-0.153485	-0.0775567	-0.0272596	0.0674685	0.118086	0.202267	0.213225	0.30145	0.360932	0.394413	0.353813	0.361383
129	-0.0975215	-0.189138	-0.195455	-0.135848	-0.146184	-0.208401	-0.177767	-0.100614	-0.027458	0.00902571	0.0858453	0.0703799	0.0750303	-0.0521759	-0.119214	-0.12129	-0.0855779	-0.0785171	-0.122472	-0.186834	-0.153765	-0.156298	-0.223844	-0.281917	-0.233917	-0.221196	-0.284	-0.294	-0.340226	-0.318559	-0.343767	-0.36208	-0.320237	-0.308769	-0.311125	-0.318495	-0.256053	-0.222547	-0.153533	-0.128702	-0.0371843	0.0170089	0.114834	0.139381	0.237219	0.325369	0.373819	0.310338	0.322677
130	-0.166233	-0.273665	-0.280618	-0.208488	-0.188728	-0.246076	-0.194106	-0.0993604	0.00981363	0.0488322	0.164099	0.141268	0.153635	0.0191261	-0.0734493	-0.08555	-0.0496489	-0.0452556	-0.10741	-0.193826	-0.174366	-0.170226	-0.245969	-0.323428	-0.274484	-0.252083	-0.315887	-0.325676	-0.384228	-0.364219	-0.396787	-0.414493	-0.383343	-0.380307	-0.369858	-0.359093	-0.275115	-0.231403	-0.129952	-0.0927311	0.0395588	0.112664	0.234626	0.268702	0.367184	0.435433	0.494317	0.445311	0.440856
131	-0.193795	-0.286501	-0.293522	-0.203793	-0.174811	-0.232456	-0.180266	-0.0864931	0.0404217	0.0633595	0.192683	0.151761	0.155147	0.0218806	-0.0916748	-0.101346	-0.0808308	-0.0768133	-0.147249	-0.234021	-0.217467	-0.223365	-0.300557	-0.376329	-0.337488	-0.319227	-0.362582	-0.358704	-0.418368	-0.388685	-0.421342	-0.438286	-0.402388	-0.393381	-0.380116	-0.369453	-0.274925	-0.231495	-0.112801	-0.0798971	0.0756548	0.145483	0.271126	0.309756	0.409405	0.463204	0.546356	0.517673	0.491826
132	-0.14123	-0.233778	-0.242061	-0.151695	-0.163697	-0.233281	-0.216382	-0.144013	-0.0621859	-0.0523505	0.0341291	-0.00644052	-0.0107392	-0.133062	-0.211859	-0.207611	-0.216093	-0.196819	-0.245848	-0.309011	-0.284011	-0.286408	-0.355306	-0.417181	-0.37363	-0.353079	-0.400085	-0.391462	-0.443929	-0.410425	-0.426851	-0.434257	-0.389707	-0.37116	-0.378323	-0.388046	-0.316061	-0.293002	-0.211503	-0.207782	-0.0831206	-0.0252961	0.0889466	0.137991	0.240438	0.323843	0.421376	0.371476	0.351839
133	-0.141569	-0.241589	-0.256645	-0.173577	-0.183319	-0.246237	-0.231157	-0.163791	-0.0869857	-0.078503	0.00943872	-0.0288516	-0.029959	-0.142775	-0.215256	-0.206763	-0.208572	-0.195705	-0.244022	-0.320723	-0.290619	-0.274312	-0.343269	-0.405418	-0.353721	-0.327015	-0.389993	-0.384824	-0.437621	-0.410493	-0.421485	-0.418634	-0.38225	-0.369938	-0.382361	-0.385745	-0.321754	-0.303179	-0.216767	-0.219316	-0.0998058	-0.0444173	0.0718183	0.123782	0.220798	0.302546	0.395737	0.340959	0.322642
134	-0.18497	-0.28371	-0.29576	-0.208337	-0.192953	-0.24799	-0.212323	-0.135025	-0.0269983	-0.0146287	0.103033	0.0565723	0.0610989	-0.0557591	-0.15574	-0.160704	-0.15629	-0.147807	-0.206248	-0.291317	-0.271122	-0.264055	-0.336367	-0.407795	-0.364792	-0.338881	-0.385976	-0.383412	-0.442453	-0.416425	-0.432411	-0.439848	-0.407436	-0.395926	-0.392503	-0.383041	-0.30295	-0.275318	-0.16784	-0.15513	-0.00690642	0.0627188	0.188904	0.239997	0.336621	0.398729	0.493145	0.456297	0.4267
135	-0.180082	-0.281336	-0.290459	-0.212954	-0.18723	-0.243317	-0.193437	-0.114202	-0.00195121	0.0152246	0.139559	0.0994853	0.110084	-3.21878e-05	-0.0988779	-0.112824	-0.102206	-0.0989327	-0.175866	-0.254826	-0.228259	-0.23309	-0.304235	-0.358248	-0.311614	-0.299978	-0.350868	-0.343638	-0.403022	-0.380468	-0.408905	-0.419685	-0.391957	-0.386956	-0.374773	-0.366137	-0.283228	-0.253035	-0.14665	-0.122669	0.0209865	0.0895918	0.220156	0.263393	0.357258	0.424277	0.498272	0.458281	0.444844
136	-0.19069	-0.274702	-0.271683	-0.199355	-0.152798	-0.197433	-0.119899	-0.0252804	0.0991389	0.121418	0.254473	0.212171	0.227117	0.126914	0.00726846	-0.0275572	0.011775	0.00979391	-0.0763458	-0.165013	-0.14394	-0.156692	-0.234892	-0.287621	-0.254965	-0.251002	-0.283738	-0.286462	-0.339905	-0.312409	-0.346449	-0.370139	-0.348829	-0.3429	-0.313775	-0.300693	-0.211453	-0.162921	-0.0438601	-0.00481815	0.144321	0.213382	0.338104	0.365648	0.451564	0.490106	0.549526	0.529398	0.513186
137	-0.196808	-0.272278	-0.273886	-0.193663	-0.152385	-0.194216	-0.135235	-0.0532741	0.0706637	0.0843554	0.220193	0.174704	0.178768	0.0859162	-0.0458581	-0.0695001	-0.0436897	-0.0510744	-0.125544	-0.206069	-0.189748	-0.206034	-0.281984	-0.33596	-0.311817	-0.303782	-0.316499	-0.312811	-0.361462	-0.3316	-0.354239	-0.374769	-0.349503	-0.339296	-0.317241	-0.304422	-0.223063	-0.180095	-0.0604742	-0.034019	0.122649	0.192932	0.312404	0.348136	0.42782	0.457461	0.53609	0.522779	0.48675
138	-0.159764	-0.220661	-0.215218	-0.160314	-0.133744	-0.177164	-0.129219	-0.0793308	0.00088255	0.000758433	0.108069	0.0777763	0.0803396	0.0140765	-0.0730008	-0.104514	-0.104313	-0.114289	-0.164094	-0.217062	-0.181058	-0.197814	-0.266504	-0.290928	-0.277359	-0.260801	-0.26754	-0.257675	-0.294691	-0.276203	-0.28838	-0.28165	-0.276098	-0.271477	-0.253573	-0.25303	-0.204467	-0.183859	-0.107558	-0.0983684	0.0350588	0.0918533	0.181207	0.215598	0.282114	0.311507	0.373184	0.35503	0.333131
139	-0.125703	-0.181489	-0.180179	-0.13659	-0.127529	-0.171138	-0.134484	-0.102958	-0.0578953	-0.0582306	0.0231681	0.00802872	0.0102136	-0.0416242	-0.0963823	-0.121191	-0.141713	-0.146919	-0.175919	-0.214035	-0.179128	-0.19147	-0.254802	-0.270242	-0.25807	-0.234678	-0.242843	-0.231121	-0.263966	-0.251775	-0.256553	-0.235159	-0.241678	-0.238049	-0.226874	-0.231268	-0.199114	-0.194792	-0.151597	-0.144868	-0.0318416	0.0197758	0.084808	0.121652	0.174897	0.20597	0.258238	0.237163	0.224972
140	-0.161314	-0.241052	-0.261094	-0.182144	-0.157904	-0.200478	-0.173752	-0.129276	-0.0432384	-0.0340696	0.07714	0.040754	0.0453792	-0.0399457	-0.137579	-0.144735	-0.155727	-0.158684	-0.195654	-0.266843	-0.24954	-0.255031	-0.325813	-0.377099	-0.352095	-0.330151	-0.345581	-0.332692	-0.382507	-0.353818	-0.35614	-0.35108	-0.343421	-0.326494	-0.322913	-0.312526	-0.254108	-0.240707	-0.155208	-0.143205	0.00338796	0.0709949	0.178021	0.227121	0.300624	0.33465	0.42364	0.400872	0.361637
141	-0.155925	-0.239849	-0.250887	-0.171677	-0.164813	-0.217261	-0.190812	-0.131549	-0.049854	-0.0466304	0.0517186	0.0153772	0.0155162	-0.0801368	-0.165418	-0.176518	-0.197706	-0.18212	-0.21092	-0.283919	-0.276723	-0.271276	-0.33717	-0.401781	-0.36481	-0.335451	-0.360169	-0.35369	-0.406138	-0.380568	-0.387596	-0.386425	-0.359894	-0.343783	-0.349175	-0.344827	-0.281106	-0.266363	-0.18243	-0.174611	-0.0360427	0.0220711	0.131496	0.181787	0.266954	0.325167	0.424447	0.394447	0.359892
142	-0.145178	-0.216291	-0.22582	-0.138337	-0.131503	-0.186968	-0.15837	-0.0891052	-0.00333079	-0.00603636	0.088004	0.0449771	0.0377934	-0.0588141	-0.144706	-0.153568	-0.17955	-0.164376	-0.211186	-0.271571	-0.265201	-0.278036	-0.345182	-0.402598	-0.376162	-0.362958	-0.372292	-0.354595	-0.405482	-0.371304	-0.378552	-0.385976	-0.350513	-0.327521	-0.325888	-0.329022	-0.259535	-0.237885	-0.151242	-0.137455	0.00245265	0.0586414	0.163744	0.204422	0.286684	0.337082	0.442153	0.425414	0.387309
143	-0.0930945	-0.154655	-0.146375	-0.0523897	-0.0813719	-0.167634	-0.155658	-0.083553	-0.035195	-0.0350153	0.0100224	-0.0329868	-0.0536445	-0.151657	-0.220286	-0.215057	-0.25461	-0.227987	-0.259214	-0.290331	-0.272301	-0.29285	-0.36193	-0.397192	-0.365449	-0.365421	-0.392772	-0.368238	-0.407847	-0.36496	-0.37551	-0.391245	-0.321258	-0.293284	-0.297548	-0.332349	-0.27086	-0.251599	-0.200557	-0.193577	-0.0964189	-0.0590978	0.0354957	0.069049	0.156867	0.236656	0.338229	0.301991	0.283089
144	-0.037927	-0.0640123	-0.0349177	0.034121	0.00235097	-0.0735835	-0.0476329	0.0215987	0.0673709	0.0736922	0.0921764	0.0637787	0.0498652	-0.0242572	-0.0621643	-0.079753	-0.10482	-0.069529	-0.132159	-0.134043	-0.116937	-0.162775	-0.21214	-0.225221	-0.210379	-0.232422	-0.241152	-0.221808	-0.241879	-0.203768	-0.231418	-0.263717	-0.193384	-0.167117	-0.161976	-0.197211	-0.144082	-0.11032	-0.0858021	-0.05882	-0.00274359	0.018514	0.0776348	0.0843268	0.15324	0.213621	0.267651	0.247841	0.250541
145	0.0344592	0.042839	0.0980445	0.156526	0.093567	0.000900618	-0.00440601	0.0533563	0.0413592	0.0598477	0.0430285	0.0236869	-0.000322295	-0.0479684	-0.043081	-0.0844444	-0.122886	-0.0592447	-0.135241	-0.0995442	-0.0745124	-0.144306	-0.178348	-0.157316	-0.154916	-0.200282	-0.203333	-0.170301	-0.169164	-0.119672	-0.145056	-0.161172	-0.0730579	-0.0479903	-0.0608653	-0.133944	-0.0969487	-0.0701377	-0.0935321	-0.0647762	-0.0564408	-0.0617489	-0.0219582	-0.0299178	0.0334383	0.108835	0.121493	0.0838879	0.128085
146	0.0245986	0.0198189	0.0491202	0.0740191	0.0184417	-0.0446533	-0.0538977	-0.00165819	-0.0135159	0.0400441	0.0236857	0.0320042	0.0188721	-0.00719804	0.0193299	-0.0299018	-0.0628348	0.018683	-0.0647889	-0.021729	-0.0330825	-0.103026	-0.111826	-0.100023	-0.117448	-0.15197	-0.135176	-0.120689	-0.111685	-0.0912571	-0.125687	-0.120448	-0.0553394	-0.0539043	-0.0788197	-0.141801	-0.124625	-0.101346	-0.12731	-0.0651292	-0.0708368	-0.0663498	-0.041394	-0.0517578	0.00914599	0.0823936	0.0722601	0.0279016	0.0823623
147	0.0754008	0.0991909	0.129418	0.134259	0.0696706	0.0201142	-0.00804742	0.0133815	-0.0269166	0.0194716	-0.0290983	-0.0121241	-0.0278837	-0.0266198	0.0275658	-0.0101374	-0.0516942	0.0281922	-0.0253074	0.0357658	0.00791847	-0.0579922	-0.0480325	-0.0165537	-0.0451595	-0.0844766	-0.0542148	-0.0354387	-0.0097119	0.00677427	-0.0250958	-0.0106637	0.0435725	0.0400984	0.00801922	-0.0590252	-0.0701641	-0.050168	-0.10423	-0.0580757	-0.0979848	-0.107334	-0.109252	-0.130072	-0.0859747	-0.0200942	-0.0427699	-0.0823198	-0.0239084
148	0.0364329	0.0530002	0.0611073	0.0326176	-0.00326671	-0.0340737	-0.0389129	-0.0105069	-0.0383172	0.0362515	0.0126966	0.050227	0.0573287	0.0705338	0.128491	0.110331	0.0836497	0.127806	0.0864336	0.146541	0.0933405	0.0364718	0.05209	0.0743135	0.0378178	0.00884367	0.0360822	0.032541	0.059478	0.0435493	-0.00230458	0.0115908	0.0365523	0.0125113	-0.00897715	-0.046819	-0.0650261	-0.042679	-0.0855031	0.00214907	-0.041902	-0.0392735	-0.0565555	-0.0803134	-0.0406276	0.00723374	-0.0425804	-0.0812593	-0.0252958
149	-0.0183068	-0.024979	-0.0253524	-0.0506832	-0.0559651	-0.0711568	-0.069041	-0.0419878	-0.0556424	0.0376399	0.0472948	0.0919873	0.114108	0.131209	0.195769	0.155813	0.137058	0.21051	0.163668	0.231329	0.145399	0.0997048	0.128919	0.112349	0.0791769	0.0668446	0.0825959	0.066446	0.0800576	0.0442925	-0.0144344	-0.00101124	0.00229791	-0.0339878	-0.0423793	-0.0609199	-0.0713696	-0.0555648	-0.103137	0.0298752	-0.00110742	0.0208499	0.0145039	0.000519819	0.0449658	0.0795797	0.0256825	-0.0106011	0.0327439
150	-0.000476467	0.00886492	0.0189072	-0.0175126	-0.00595875	0.000522273	0.0219303	0.0422674	0.0437397	0.14067	0.1462	0.202944	0.229832	0.263825	0.323697	0.271688	0.274922	0.355008	0.275356	0.347676	0.248112	0.208816	0.250068	0.233557	0.196664	0.179182	0.207694	0.186775	0.204257	0.163584	0.0953957	0.107366	0.0950287	0.0516875	0.049585	0.0413343	0.0373605	0.0661091	0.0206314	0.159601	0.120594	0.136456	0.119447	0.0942032	0.112066	0.116194	0.043	0.0293286	0.0774218
151	-0.00836599	-0.00384381	-0.00294178	-0.0438421	-0.0461625	-0.0464737	-0.0198595	0.0104375	0.0141963	0.0834366	0.0839144	0.13347	0.146254	0.188286	0.237304	0.182649	0.233867	0.27607	0.197588	0.255655	0.202572	0.162019	0.192126	0.205076	0.168395	0.140667	0.166457	0.148314	0.175255	0.128754	0.0717945	0.0901396	0.0815855	0.0304225	0.012902	0.0051552	-0.00411797	0.0176268	0.00424706	0.0928486	0.0616541	0.0629477	0.0472618	0.0255638	0.0375417	0.0472858	-0.0215222	-0.0347985	0.00995005
152	-0.049217	-0.060661	-0.0657652	-0.101211	-0.0997437	-0.115313	-0.0824508	-0.0227075	-0.00576074	0.0429429	0.0616521	0.10361	0.130452	0.168541	0.203307	0.160571	0.211007	0.240392	0.13151	0.153605	0.12652	0.10512	0.116545	0.121908	0.100336	0.0760676	0.0871919	0.0681391	0.0910466	0.0390351	-0.0171462	0.0167699	0.0233088	-0.0373491	-0.0719948	-0.0812981	-0.0776885	-0.051545	-0.0157682	0.0481335	0.0348213	0.039381	0.0333385	0.016337	0.0365101	0.0516977	-0.0201463	-0.0333969	0.00558456
153	-0.0893761	-0.109882	-0.135843	-0.152649	-0.166866	-0.185877	-0.157876	-0.092179	-0.0581845	-0.0524918	-0.0338705	-0.0312444	-0.00338938	0.0186343	0.0240358	0.0142839	0.073148	0.0775937	-0.0413644	-0.0208328	-0.0107791	-0.0420833	-0.044387	-0.0261178	-0.0449097	-0.0680445	-0.0533144	-0.0648068	-0.0463004	-0.0928723	-0.137369	-0.100656	-0.0920367	-0.14684	-0.187928	-0.191601	-0.181911	-0.15734	-0.0741786	-0.0797222	-0.0641677	-0.0717602	-0.0643597	-0.0622889	-0.0367598	-0.005644	-0.0311909	-0.0495183	-0.0321649
154	-0.0160837	-0.0320082	-0.0311045	-0.0390094	-0.0363204	-0.0830073	-0.0334361	-0.0203471	0.00779595	0.054937	0.0928202	0.0910056	0.113217	0.151283	0.138406	0.107916	0.138315	0.140778	-0.0123343	0.0142332	0.035244	-0.0597968	-0.0818682	-0.01059	-0.0257215	-0.0841804	-0.00199772	0.0297896	0.0170238	-0.0120321	-0.0633546	-0.0582954	-0.0801429	-0.103941	-0.094333	-0.106486	-0.0975861	-0.0991617	-0.10513	-0.0099948	0.0424158	0.0476373	0.0645124	0.0461906	0.0620423	0.0774774	0.0587859	0.0506189	0.0681756
155	-0.108762	-0.161356	-0.184845	-0.172766	-0.175158	-0.22579	-0.198077	-0.181264	-0.152138	-0.115855	-0.041329	-0.0477932	-0.0118692	-0.00290548	-0.0449834	0.0381165	-0.00558599	-0.0635329	-0.196696	-0.226251	-0.212574	-0.250892	-0.289684	-0.260976	-0.23143	-0.260719	-0.238584	-0.199818	-0.239362	-0.258637	-0.276472	-0.2487	-0.250879	-0.268523	-0.284416	-0.2947	-0.275528	-0.288392	-0.258113	-0.186466	-0.113615	-0.0799813	-0.0425823	-0.0326825	0.0209338	0.0623952	0.058746	0.0230106	0.0291142
156	-0.0972925	-0.156468	-0.17688	-0.135257	-0.160602	-0.21935	-0.244905	-0.23703	-0.258129	-0.250441	-0.193493	-0.201433	-0.186722	-0.185813	-0.205073	-0.142769	-0.253722	-0.261471	-0.331563	-0.364557	-0.361157	-0.371446	-0.416665	-0.424702	-0.38154	-0.388491	-0.408454	-0.369268	-0.408504	-0.376632	-0.349176	-0.318498	-0.278097	-0.255327	-0.303039	-0.338881	-0.326073	-0.353838	-0.339909	-0.324243	-0.264995	-0.231959	-0.18178	-0.145561	-0.0695888	0.00130431	0.0256203	-0.0354762	-0.0351022
157	-0.0131281	-0.0500047	-0.0622942	-0.025326	-0.0834508	-0.144056	-0.195831	-0.213753	-0.269232	-0.275359	-0.278693	-0.289666	-0.292532	-0.261887	-0.239726	-0.208364	-0.343134	-0.315007	-0.375929	-0.379537	-0.362615	-0.365406	-0.390635	-0.373136	-0.331362	-0.343732	-0.348625	-0.30351	-0.327873	-0.288927	-0.255976	-0.216722	-0.168618	-0.144749	-0.210261	-0.267994	-0.275722	-0.312705	-0.338638	-0.347398	-0.332999	-0.323187	-0.298136	-0.261262	-0.201311	-0.123166	-0.0905387	-0.148727	-0.138371
158	0.0440772	0.0224154	0.0144278	0.0466046	-0.0494951	-0.130466	-0.213014	-0.252024	-0.343429	-0.364446	-0.408092	-0.408952	-0.412444	-0.348294	-0.286599	-0.291209	-0.445197	-0.362232	-0.446548	-0.40638	-0.390838	-0.425993	-0.431984	-0.380922	-0.371285	-0.389065	-0.361325	-0.31708	-0.318089	-0.283147	-0.244368	-0.188018	-0.125037	-0.104257	-0.198009	-0.277719	-0.301678	-0.354384	-0.414371	-0.441349	-0.449608	-0.464053	-0.447036	-0.406215	-0.339195	-0.244553	-0.202242	-0.271141	-0.258845
159	0.121577	0.131536	0.139316	0.161004	0.0597986	-0.0275327	-0.1068	-0.16384	-0.276414	-0.307301	-0.381848	-0.392686	-0.403284	-0.323247	-0.247402	-0.274912	-0.434685	-0.320283	-0.40556	-0.331134	-0.30066	-0.358722	-0.352713	-0.257212	-0.263825	-0.303209	-0.244907	-0.188348	-0.171384	-0.144824	-0.117938	-0.0622807	-0.0113723	0.00213687	-0.07691	-0.159112	-0.198049	-0.257536	-0.35101	-0.377546	-0.406465	-0.447877	-0.446266	-0.418977	-0.371572	-0.294232	-0.258933	-0.309376	-0.298147
160	0.145346	0.160391	0.1742	0.18529	0.0790609	-0.00454683	-0.0760678	-0.127367	-0.250948	-0.287088	-0.365999	-0.37198	-0.386584	-0.295081	-0.226209	-0.26148	-0.369661	-0.26782	-0.360717	-0.274812	-0.250033	-0.329347	-0.312355	-0.203434	-0.23515	-0.276877	-0.19146	-0.141715	-0.107171	-0.0855187	-0.0640592	-0.00566928	0.0407284	0.0440495	-0.0294167	-0.117184	-0.163828	-0.21788	-0.308821	-0.34889	-0.381471	-0.427281	-0.435682	-0.421959	-0.388596	-0.315262	-0.282464	-0.329205	-0.320885
161	0.140546	0.166797	0.186219	0.195762	0.0962936	0.0204289	-0.0372131	-0.0805469	-0.199805	-0.243534	-0.317838	-0.322005	-0.347916	-0.263021	-0.212365	-0.250386	-0.32805	-0.233715	-0.316397	-0.233306	-0.207376	-0.287357	-0.271604	-0.173098	-0.206028	-0.255724	-0.176036	-0.129505	-0.0839205	-0.0589901	-0.0435677	0.00844879	0.0628654	0.0672533	0.000815674	-0.0859815	-0.122339	-0.167594	-0.244264	-0.293495	-0.321979	-0.372656	-0.381625	-0.384395	-0.362416	-0.297989	-0.264393	-0.296977	-0.29355
162	0.18864	0.239672	0.268367	0.264655	0.171477	0.106842	0.0590398	0.0116151	-0.10666	-0.150399	-0.247001	-0.257723	-0.293065	-0.200124	-0.139816	-0.185502	-0.252676	-0.159505	-0.244599	-0.143811	-0.11814	-0.200175	-0.170766	-0.0584765	-0.0951229	-0.145195	-0.0589792	-0.00881723	0.0389641	0.0613467	0.0761061	0.11927	0.160291	0.167688	0.112217	0.027103	-0.0104174	-0.0513038	-0.146301	-0.188948	-0.235258	-0.302897	-0.329308	-0.338811	-0.338253	-0.294232	-0.268305	-0.281843	-0.274487
163	0.19303	0.237578	0.271126	0.281728	0.199965	0.134364	0.0891615	0.0398712	-0.0667664	-0.115633	-0.213591	-0.230208	-0.264563	-0.187088	-0.129233	-0.170533	-0.273262	-0.175156	-0.241357	-0.152725	-0.107055	-0.170618	-0.158794	-0.0471132	-0.0593608	-0.109291	-0.0481899	0.0118885	0.0375116	0.068084	0.0864122	0.110375	0.14262	0.164923	0.128248	0.0522097	0.0211203	-0.0212793	-0.123809	-0.156209	-0.199878	-0.262718	-0.286571	-0.298059	-0.302159	-0.265056	-0.234582	-0.24065	-0.229992
164	0.154615	0.19021	0.221106	0.249454	0.175713	0.101614	0.0606996	0.0212204	-0.0763027	-0.122996	-0.207391	-0.22726	-0.267515	-0.223079	-0.172162	-0.207858	-0.300896	-0.207842	-0.254172	-0.186063	-0.128702	-0.182357	-0.194567	-0.0955667	-0.0897885	-0.147199	-0.121313	-0.055654	-0.0416114	-0.00294424	0.0125085	0.0288845	0.0740175	0.10472	0.0736154	0.00388135	-0.0195805	-0.0550073	-0.136614	-0.167936	-0.199461	-0.25739	-0.271833	-0.287538	-0.283891	-0.238773	-0.196849	-0.209089	-0.200343
165	0.142349	0.196919	0.231876	0.255089	0.2116	0.158171	0.135275	0.110263	0.054987	0.0295062	-0.0449124	-0.071603	-0.102478	-0.0710326	-0.0239732	-0.061456	-0.122855	-0.0715177	-0.13432	-0.0860843	-0.0388016	-0.0657179	-0.0730965	0.0149725	0.0365068	-0.0134341	0.0147318	0.0751434	0.0783881	0.10099	0.100133	0.107329	0.128992	0.159107	0.147918	0.0913149	0.0808903	0.0648721	-3.87167e-05	-0.0165914	-0.0488056	-0.0948388	-0.11546	-0.146681	-0.152171	-0.110921	-0.0662676	-0.0778483	-0.0650728
166	0.139993	0.199422	0.237269	0.256248	0.226926	0.1934	0.178839	0.153312	0.109473	0.086614	0.0123026	-0.0132138	-0.0474635	-0.0342963	0.0126633	-0.0193427	-0.087431	-0.0450536	-0.0842292	-0.035356	0.0120864	-0.00121375	-0.0144101	0.0633278	0.0960559	0.044136	0.054615	0.120342	0.12389	0.1505	0.143181	0.147269	0.161539	0.191176	0.1938	0.142737	0.137485	0.130643	0.0682625	0.0554266	0.0139264	-0.0293354	-0.0554146	-0.0844634	-0.104466	-0.0893807	-0.0535726	-0.0503856	-0.0348112
167	0.106775	0.150355	0.184978	0.208856	0.188625	0.16082	0.147243	0.128462	0.089952	0.064903	0.0012785	-0.0226819	-0.0720654	-0.0932831	-0.0533537	-0.0731086	-0.134978	-0.0988343	-0.0939602	-0.0514561	0.00260665	0.00726733	-0.0242221	0.0249035	0.0726693	0.0299074	-0.00612451	0.0574628	0.0564026	0.0898171	0.0849581	0.0882685	0.115154	0.147549	0.153221	0.109627	0.106717	0.102387	0.0580762	0.035961	0.000915429	-0.0357505	-0.0542784	-0.0686217	-0.090385	-0.0854367	-0.0597479	-0.0541115	-0.035913
168	0.0935433	0.127223	0.151058	0.170323	0.146931	0.123043	0.11531	0.101105	0.0753755	0.0534388	-0.00767685	-0.0264334	-0.0542936	-0.0760155	-0.0299644	-0.0435461	-0.136255	-0.097676	-0.0982949	-0.064413	-0.00732447	0.00363629	-0.0330925	0.016989	0.0639501	0.0254253	-0.0137452	0.0409344	0.0435988	0.0700898	0.0623462	0.062788	0.0779765	0.109494	0.117361	0.0799309	0.0801415	0.0775443	0.0356918	0.0207169	-0.0103114	-0.0442817	-0.0560669	-0.0571238	-0.0752475	-0.0728196	-0.0524278	-0.0528298	-0.0327244
169	0.0186966	0.0151722	0.0202387	0.0474688	0.0392366	0.0151667	0.0212299	0.0215861	0.0428311	0.0230539	-0.00551605	-0.0279111	-0.0305391	-0.0780535	-0.0473724	-0.0378105	-0.134192	-0.116157	-0.108585	-0.113662	-0.0499814	-0.0179639	-0.0759638	-0.0533607	0.0114613	-0.0104223	-0.089206	-0.0486507	-0.0644871	-0.0427125	-0.0517497	-0.0581258	-0.050883	-0.0226959	-0.0126807	-0.0265464	-0.0128977	-0.0121966	-0.00655842	-0.018672	-0.0152553	-0.0268717	-0.0204429	-0.00690731	-0.00826314	-0.00537178	0.0215852	0.0123477	0.0196392
170	0.0375458	0.0517337	0.0592291	0.0816502	0.0783444	0.0662261	0.0760465	0.0827218	0.0942508	0.0678846	0.0188874	-0.00832184	-0.00392667	-0.0290899	0.00742947	0.00612508	-0.0787298	-0.0533185	-0.0563729	-0.0672835	-0.0104542	0.0349264	-0.00678972	0.0144185	0.0708669	0.0534468	0.00491468	0.0290332	0.013957	0.0208325	0.0160213	0.0137561	0.0138552	0.0347593	0.0500495	0.037839	0.0530659	0.0583154	0.0642525	0.0476089	0.0320089	0.00457985	-0.00824747	-0.00149026	-0.0233421	-0.033001	0.0147114	0.024324	0.0155693
171	0.0573393	0.0998632	0.131367	0.151613	0.15516	0.147447	0.166059	0.163322	0.1774	0.155039	0.107598	0.0791978	0.0833532	0.0758205	0.0918811	0.0725458	-0.0207435	0.0149405	-0.00905141	-0.0131703	0.0509191	0.0816513	0.0432473	0.0829695	0.131839	0.102354	0.0921957	0.128543	0.110208	0.121389	0.11608	0.108447	0.0945355	0.11339	0.140358	0.124249	0.139178	0.14153	0.134067	0.128116	0.112575	0.0869526	0.0723237	0.0586117	0.04308	0.0379639	0.0665411	0.0809203	0.0819906
172	0.10974	0.179983	0.2283	0.233911	0.226653	0.222604	0.219362	0.185731	0.168019	0.154868	0.0913306	0.071133	0.0568162	0.0816544	0.108068	0.0867718	-0.0275714	0.0179058	0.00191725	0.0298134	0.0779276	0.0945171	0.0825343	0.143335	0.177672	0.142034	0.156634	0.204757	0.194316	0.2123	0.214764	0.20813	0.198415	0.215883	0.237299	0.204658	0.202757	0.190111	0.135562	0.134	0.0918365	0.0615194	0.0302118	0.00352259	-0.0158423	-0.0143376	-0.0162516	-0.00177756	0.024581
173	0.109415	0.189298	0.244828	0.246667	0.247155	0.25566	0.25308	0.215935	0.212661	0.191574	0.124363	0.10154	0.0819757	0.106	0.122927	0.0934296	-0.00552163	0.0402136	0.0414789	0.0694403	0.121799	0.142846	0.137019	0.194077	0.219503	0.190371	0.206585	0.247049	0.242747	0.257516	0.261837	0.247646	0.231003	0.246443	0.276093	0.255065	0.24958	0.237654	0.191676	0.183398	0.136541	0.0985184	0.0636664	0.0325097	0.000916305	-0.0166023	-0.0228577	0.0075505	0.0301143
174	0.131257	0.210177	0.266432	0.268953	0.259537	0.252515	0.243578	0.200874	0.179338	0.158559	0.0850353	0.0641842	0.0403418	0.064774	0.0892372	0.0515921	-0.0488471	0.00491928	-0.00722848	0.034804	0.0904137	0.0968877	0.0879648	0.160462	0.185298	0.148734	0.166934	0.222599	0.217861	0.238564	0.244915	0.237396	0.234448	0.253299	0.270552	0.240022	0.23135	0.212459	0.147775	0.143335	0.100685	0.0607572	0.0256073	-0.00478688	-0.030834	-0.0342329	-0.0375974	-0.0147427	0.00878364
175	0.148529	0.226443	0.27574	0.271786	0.262262	0.258336	0.239275	0.182927	0.155872	0.137899	0.0668876	0.04204	0.03	0.0817452	0.104882	0.0823653	-0.0140328	0.0233396	0.0192594	0.061092	0.0854446	0.0919387	0.112959	0.187146	0.211127	0.170716	0.202722	0.256998	0.254039	0.2655	0.273693	0.260028	0.25306	0.264757	0.277314	0.256466	0.237384	0.212915	0.143981	0.14761	0.0985938	0.0594205	0.0134277	-0.0188667	-0.0544508	-0.0623119	-0.0727729	-0.0494683	-0.0313214
176	0.148382	0.226777	0.278597	0.271232	0.25821	0.273411	0.249787	0.181131	0.158481	0.143824	0.0639681	0.0423142	0.0260444	0.0757309	0.107168	0.10012	-0.00920258	0.0295782	0.0516442	0.0978204	0.104286	0.126821	0.17306	0.235043	0.252041	0.218419	0.256137	0.305569	0.301987	0.304297	0.311785	0.289477	0.266813	0.27685	0.295515	0.289248	0.262534	0.234313	0.163827	0.169387	0.101539	0.0496899	0.00159659	-0.0239224	-0.0616013	-0.0750809	-0.0960763	-0.065244	-0.0481652
177	0.160568	0.248735	0.310911	0.300993	0.286546	0.300768	0.275314	0.191293	0.156877	0.136662	0.0533701	0.0458733	0.0381027	0.108768	0.139501	0.114772	0.0137724	0.0512118	0.0764423	0.124655	0.135318	0.147573	0.183069	0.252897	0.267221	0.231895	0.273372	0.322707	0.326932	0.329502	0.335694	0.31742	0.302089	0.312659	0.333117	0.317285	0.287378	0.252974	0.165292	0.168508	0.0980892	0.0510723	-0.00647796	-0.0337525	-0.0736907	-0.0922379	-0.120192	-0.0880438	-0.0711771
178	0.17462	0.261577	0.317609	0.312301	0.278867	0.271466	0.22848	0.140401	0.084085	0.0654732	-0.0205417	-0.0299956	-0.0393984	0.0444873	0.0894255	0.0576652	-0.0513369	-0.00511468	-0.000844028	0.0559364	0.0876372	0.0700393	0.0933202	0.187797	0.195891	0.150203	0.202434	0.262172	0.277431	0.285937	0.293815	0.289819	0.289226	0.299669	0.303864	0.26255	0.227085	0.185982	0.0852438	0.0814248	0.0177335	-0.0323932	-0.0839394	-0.108762	-0.144989	-0.143801	-0.162316	-0.147731	-0.122458
179	0.184779	0.274409	0.326007	0.307948	0.276035	0.284339	0.233954	0.144083	0.0812187	0.0659035	-0.0265651	-0.0387506	-0.0459099	0.0429737	0.102565	0.0829023	-0.0263834	0.0135081	0.0260877	0.0887786	0.112467	0.0943086	0.130615	0.228166	0.228839	0.186735	0.248787	0.300065	0.325879	0.322824	0.332138	0.326391	0.316012	0.321192	0.325508	0.291296	0.246454	0.205945	0.0988297	0.091957	0.0160474	-0.0352458	-0.0954122	-0.12337	-0.167463	-0.175341	-0.1968	-0.18125	-0.155314
180	0.169968	0.262466	0.319424	0.297993	0.274422	0.293162	0.254659	0.163375	0.109102	0.0966583	0.00954446	0.00147478	-0.00255923	0.0773492	0.13077	0.109831	0.00948673	0.0464463	0.0690196	0.125579	0.143448	0.136237	0.170196	0.255674	0.258966	0.223493	0.278009	0.325494	0.344316	0.339177	0.34601	0.337298	0.320719	0.325115	0.335706	0.313755	0.274282	0.234592	0.133255	0.134652	0.0526541	0.00490848	-0.0508915	-0.0824578	-0.1284	-0.145847	-0.175855	-0.152857	-0.129289
181	0.141952	0.226176	0.28056	0.262394	0.233444	0.242401	0.204516	0.140808	0.0910444	0.0822847	0.0118721	0.00144988	-0.00824513	0.0737511	0.108254	0.0777056	0.0102277	0.0343067	0.040027	0.0920669	0.121545	0.103477	0.130558	0.222954	0.212928	0.175536	0.229438	0.269043	0.298721	0.293725	0.293635	0.295064	0.289238	0.284054	0.292756	0.25731	0.217158	0.191522	0.112585	0.103832	0.0340983	5.88517e-05	-0.046521	-0.0901266	-0.122771	-0.124465	-0.155294	-0.148354	-0.113048
182	0.149166	0.229711	0.275779	0.250285	0.212656	0.218491	0.170082	0.098629	0.0380103	0.0291947	-0.0434058	-0.0432102	-0.052026	0.0439728	0.0834257	0.0556889	-0.00459232	0.0102924	0.0167335	0.0763485	0.0974289	0.063594	0.104217	0.198625	0.173805	0.138313	0.211292	0.245358	0.285729	0.276946	0.278247	0.288259	0.285083	0.275333	0.272227	0.232353	0.180152	0.151019	0.0613337	0.052587	-0.0160233	-0.055938	-0.106712	-0.142426	-0.17633	-0.172963	-0.201953	-0.201253	-0.165902
183	0.144848	0.221465	0.260683	0.232849	0.189129	0.191339	0.144973	0.0823795	0.0154681	0.0078602	-0.0626039	-0.0614368	-0.0681061	0.0322825	0.0738699	0.0492086	-0.0175596	0.0115418	-0.00726103	0.0513947	0.0690261	0.0382876	0.0771464	0.171182	0.142858	0.109095	0.192905	0.223893	0.266875	0.255643	0.255256	0.277732	0.276496	0.260244	0.24234	0.1974	0.146493	0.118221	0.0320087	0.023598	-0.0436352	-0.0827086	-0.124803	-0.162044	-0.188068	-0.17787	-0.204234	-0.208147	-0.171401
184	0.169406	0.248254	0.286378	0.252033	0.198375	0.200021	0.145957	0.0672475	-0.0244296	-0.0358301	-0.125142	-0.120131	-0.118757	-0.00135875	0.0660625	0.0446213	-0.053499	-0.0140408	-0.0390123	0.0330734	0.0353942	0.0049891	0.0601085	0.163863	0.133972	0.0970982	0.197377	0.233706	0.277202	0.266016	0.273927	0.300575	0.299046	0.285167	0.256041	0.206371	0.146484	0.1079	-0.00208138	-0.0118373	-0.0986294	-0.144534	-0.198771	-0.227714	-0.254683	-0.242774	-0.267173	-0.272341	-0.24255
185	0.205385	0.298807	0.348886	0.305752	0.230903	0.22741	0.151047	0.0518933	-0.0711732	-0.0922115	-0.211781	-0.199414	-0.199354	-0.0604272	0.0423899	0.0170974	-0.10731	-0.0560017	-0.0710994	0.0296768	0.0259899	-0.0170435	0.0600864	0.186043	0.149465	0.103085	0.216742	0.260745	0.311992	0.296199	0.309231	0.34046	0.341644	0.329682	0.294067	0.230292	0.154716	0.101595	-0.0423201	-0.0604422	-0.172588	-0.234436	-0.307256	-0.326916	-0.363648	-0.345974	-0.369361	-0.375449	-0.347696
186	0.204754	0.282765	0.321658	0.268216	0.179332	0.166514	0.0750375	-0.0261194	-0.172161	-0.189464	-0.311103	-0.287373	-0.285316	-0.131883	-0.00611289	-0.033528	-0.156418	-0.0963624	-0.108097	0.00216042	-0.0133172	-0.0678316	0.0175055	0.146598	0.0972603	0.0455362	0.167318	0.203173	0.26725	0.246878	0.263114	0.306576	0.310582	0.296478	0.242673	0.17357	0.0849686	0.0206173	-0.137478	-0.154955	-0.271802	-0.3387	-0.409813	-0.417172	-0.449165	-0.425725	-0.447756	-0.460373	-0.436017
187	0.172908	0.219791	0.236544	0.198705	0.113559	0.0946348	-0.0044561	-0.103866	-0.23577	-0.235886	-0.338161	-0.316059	-0.30415	-0.168337	-0.0640637	-0.0761672	-0.22535	-0.148956	-0.160602	-0.0743171	-0.100765	-0.14499	-0.0672954	0.027284	-0.0167755	-0.0550824	0.0671384	0.0985314	0.147943	0.131999	0.156976	0.209294	0.216207	0.200697	0.135757	0.0712501	-0.00937896	-0.0780728	-0.218769	-0.216528	-0.310019	-0.357357	-0.411672	-0.406323	-0.415319	-0.379983	-0.388752	-0.414788	-0.401067
188	0.125102	0.146386	0.147268	0.106271	0.0121125	-0.0131785	-0.111442	-0.196042	-0.329356	-0.328942	-0.416057	-0.390949	-0.378015	-0.24497	-0.142479	-0.137445	-0.256805	-0.218677	-0.23827	-0.162923	-0.194422	-0.241463	-0.16364	-0.0795416	-0.131055	-0.159037	-0.0419569	-0.0250722	0.0239477	0.00878454	0.0436045	0.101404	0.119504	0.107323	0.0289428	-0.0371753	-0.124148	-0.189378	-0.308125	-0.322941	-0.401496	-0.441051	-0.486913	-0.467793	-0.461484	-0.407595	-0.414328	-0.459599	-0.439535
189	0.0537983	0.0435271	0.0221382	-0.00673715	-0.073547	-0.0880095	-0.178967	-0.239489	-0.344919	-0.325424	-0.358586	-0.323293	-0.315356	-0.219541	-0.161702	-0.128364	-0.1991	-0.202669	-0.214057	-0.186235	-0.25873	-0.269253	-0.189033	-0.168569	-0.206042	-0.204775	-0.109122	-0.105509	-0.0761037	-0.0893378	-0.0498317	0.00232125	0.0154556	0.0061281	-0.0688263	-0.108944	-0.181272	-0.232379	-0.316063	-0.318546	-0.366185	-0.366444	-0.391364	-0.361993	-0.349008	-0.30209	-0.308901	-0.356406	-0.35023
190	0.00273767	-0.0300722	-0.0629356	-0.0894401	-0.152621	-0.166583	-0.238557	-0.275223	-0.351229	-0.337924	-0.346682	-0.318664	-0.31713	-0.250702	-0.223863	-0.18977	-0.171162	-0.223439	-0.235102	-0.236217	-0.287754	-0.296697	-0.235752	-0.236963	-0.277354	-0.257565	-0.18039	-0.201978	-0.172985	-0.180293	-0.135221	-0.0874275	-0.0681963	-0.0799682	-0.154809	-0.187072	-0.246027	-0.28766	-0.326817	-0.353533	-0.372872	-0.363667	-0.369205	-0.333442	-0.317205	-0.260549	-0.256092	-0.313171	-0.304071
191	-0.00766463	-0.0267889	-0.0654958	-0.115109	-0.143047	-0.138345	-0.189478	-0.219316	-0.297049	-0.268427	-0.268771	-0.230445	-0.223037	-0.167628	-0.146561	-0.0902553	-0.060702	-0.115914	-0.100549	-0.0931399	-0.155444	-0.157351	-0.0999372	-0.0918355	-0.123203	-0.118978	-0.0473735	-0.064121	-0.0406849	-0.0768252	-0.0549422	-0.00667581	-0.0196285	-0.0442025	-0.0948408	-0.0956932	-0.160296	-0.197631	-0.245512	-0.23377	-0.265226	-0.257847	-0.276797	-0.252027	-0.2659	-0.251263	-0.269519	-0.292614	-0.301465
192	0.0231227	0.0293032	0.00804701	-0.0425083	-0.0671391	-0.0464609	-0.0903743	-0.137642	-0.215171	-0.16855	-0.186053	-0.152109	-0.135516	-0.0705843	-0.0312001	0.0322078	0.0148287	-0.0495356	-0.0203452	-0.00853053	-0.0778216	-0.0739146	-0.00418289	0.01039	-0.0153861	-0.0137228	0.0615074	0.0540278	0.0717672	0.0328989	0.0497711	0.0864887	0.0627028	0.0411888	0.00979887	0.00185031	-0.0598538	-0.0949704	-0.162062	-0.127166	-0.180062	-0.179265	-0.211088	-0.20549	-0.220768	-0.211943	-0.239584	-0.261076	-0.260117
193	-0.00716363	0.0111556	0.00462851	-0.0343426	-0.0229903	-3.65508e-05	-0.00860541	-0.02855	-0.0788754	-0.0151419	-0.00163236	0.0279043	0.0379	0.0639206	0.0710958	0.112264	0.102909	0.0536094	0.084149	0.0880443	0.0253298	0.0202565	0.0589591	0.0566302	0.0379031	0.03175	0.0887495	0.0869494	0.0965952	0.0742742	0.0701815	0.0783079	0.0679262	0.056253	0.0495436	0.0459907	0.013999	0.00499086	-0.0464827	0.019211	-0.0118474	-0.00203526	-0.0278417	-0.0405769	-0.0585237	-0.0691175	-0.122639	-0.128874	-0.112323
194	-0.0443536	-0.0578629	-0.079804	-0.104876	-0.0998912	-0.0904291	-0.118254	-0.12311	-0.168299	-0.105908	-0.0733327	-0.0404057	-0.0473883	-0.0343182	-0.0468324	0.00193209	0.03563	-0.0189199	-0.000374423	-0.0141865	-0.0845432	-0.0696689	-0.0338813	-0.0601582	-0.0677422	-0.0594125	-0.0166585	-0.0260272	-0.0247291	-0.0458197	-0.0419932	-0.0192986	-0.0231142	-0.0347456	-0.0657868	-0.0633077	-0.0941354	-0.107134	-0.143101	-0.088719	-0.0994974	-0.0796036	-0.0853644	-0.0745597	-0.0733784	-0.0635049	-0.106168	-0.126926	-0.118797
195	-0.0866573	-0.123521	-0.162288	-0.171616	-0.154248	-0.153505	-0.168368	-0.159421	-0.164477	-0.0934986	-0.0307636	-0.00334768	-0.000594746	-0.00859606	-0.0350039	0.00630123	0.0408258	0.00693385	-0.0150963	-0.052551	-0.11312	-0.0909861	-0.076291	-0.126324	-0.116495	-0.0994743	-0.0775549	-0.0890501	-0.108489	-0.12795	-0.134458	-0.115761	-0.121615	-0.132992	-0.160453	-0.150908	-0.159495	-0.162995	-0.167867	-0.0995726	-0.0725119	-0.0320968	-0.01085	0.0125712	0.0304014	0.0400249	0.00918138	-0.011792	-0.014236
196	-0.0378212	-0.0636458	-0.0953284	-0.0999571	-0.115045	-0.133841	-0.182931	-0.200388	-0.24291	-0.19934	-0.174461	-0.158667	-0.157071	-0.13837	-0.137128	-0.0849581	-0.0885453	-0.125848	-0.145163	-0.167472	-0.216755	-0.203041	-0.180428	-0.196113	-0.187365	-0.18138	-0.144514	-0.140872	-0.150296	-0.157812	-0.144029	-0.113969	-0.103111	-0.102802	-0.152861	-0.170353	-0.193789	-0.218367	-0.246116	-0.223895	-0.220559	-0.192088	-0.178373	-0.149758	-0.126797	-0.0932514	-0.102312	-0.139603	-0.139668
197	0.0223229	0.0393893	0.016174	-0.015193	-0.028527	-0.0159284	-0.068036	-0.112617	-0.182708	-0.141901	-0.153669	-0.127497	-0.121932	-0.066631	-0.0337597	0.0343206	-0.00852847	-0.0493501	-0.0407665	-0.0456478	-0.115952	-0.0871961	-0.0270102	-0.0283635	-0.027323	-0.0269753	0.0268263	0.0302136	0.0342694	0.0144401	0.0334382	0.0583912	0.044641	0.0410706	0.0102182	-0.000937567	-0.0460049	-0.0737554	-0.140668	-0.11499	-0.161291	-0.149833	-0.177421	-0.166121	-0.17643	-0.170962	-0.20202	-0.217105	-0.210854
198	-0.00837093	-0.00163632	-0.0255235	-0.0467492	-0.0266151	0.00368897	-0.0182263	-0.040028	-0.0597576	-0.0105267	0.000804712	0.0233877	0.0430526	0.0644324	0.069883	0.132369	0.0566178	0.0440645	0.0598794	0.0342285	-0.0278662	0.0200149	0.063656	0.0231035	0.0406571	0.0494003	0.0775006	0.075836	0.0563558	0.0389123	0.0479718	0.0533919	0.0289586	0.0267434	0.0162055	0.0330054	0.0132682	0.00375384	-0.0289589	0.0275029	0.00287334	0.0271721	0.0101465	0.0243776	0.00996906	-0.0112953	-0.0484682	-0.0418806	-0.0491877
199	-0.0266735	-0.0300666	-0.0465384	-0.0397743	-0.0280725	-0.0326006	-0.0539099	-0.0617328	-0.0696328	-0.0287349	-0.00668055	-0.00648865	0.00209683	-0.00376575	-0.0103979	0.00857318	-0.0583479	-0.0197643	-0.0327654	-0.0568833	-0.0897296	-0.0678365	-0.0568936	-0.0828375	-0.0591585	-0.0585701	-0.035533	-0.0276698	-0.0494035	-0.0432241	-0.0444131	-0.0314513	-0.0430589	-0.0446322	-0.0586388	-0.0615077	-0.0627161	-0.0696045	-0.0915859	-0.0512081	-0.0443764	-0.0162133	0.00249692	0.0274165	0.0343827	0.0387117	0.0320687	0.0256921	0.0163464
200	0.0469364	0.075365	0.076609	0.0754594	0.0509861	0.0367168	-0.00953524	-0.0396445	-0.0991119	-0.0808475	-0.102443	-0.103746	-0.118363	-0.0934831	-0.0696975	-0.0523334	-0.132816	-0.0999096	-0.105441	-0.0922561	-0.114053	-0.106807	-0.0844814	-0.0601144	-0.0484863	-0.0651089	-0.0241519	0.00726175	0.00775489	0.0215802	0.0353405	0.0564227	0.0499567	0.0599961	0.0365185	0.00444011	-0.0219112	-0.0443517	-0.103733	-0.105007	-0.1332	-0.135078	-0.138606	-0.12431	-0.131811	-0.109813	-0.108929	-0.122088	-0.11887
201	0.0685184	0.114554	0.122987	0.100594	0.0969467	0.121902	0.0784694	0.0290845	-0.0182808	-0.00106356	-0.0349193	-0.0263346	-0.0276744	0.0179321	0.052454	0.0839616	-0.0348376	-0.00977784	0.0161456	0.0245419	-0.0130815	0.0296853	0.0810084	0.0922751	0.102742	0.0948006	0.145808	0.166604	0.161992	0.15525	0.179914	0.183818	0.155312	0.160196	0.152943	0.149613	0.118187	0.0868158	0.0192063	0.0330268	-0.022967	-0.0350621	-0.0694754	-0.0604596	-0.0950871	-0.113846	-0.138004	-0.123128	-0.124004
202	0.0161463	0.0508629	0.0547185	0.0520663	0.0761305	0.103695	0.0874777	0.0665764	0.0634153	0.0756718	0.0629556	0.0642861	0.0733518	0.0836545	0.100555	0.115741	-0.00651661	0.0398107	0.0606994	0.0446633	0.0239226	0.0863279	0.104694	0.0834876	0.117504	0.11628	0.123652	0.139166	0.113877	0.11463	0.127909	0.118056	0.0906016	0.0967127	0.105486	0.118215	0.113936	0.105579	0.0786716	0.102129	0.0707604	0.0752819	0.0628608	0.0735106	0.0479067	0.0150328	-0.00193825	0.0254991	0.0142326
203	0.0391312	0.0801577	0.100268	0.113894	0.12329	0.128556	0.112758	0.0839732	0.0759009	0.0856362	0.0612914	0.0495606	0.0449644	0.0474234	0.0648262	0.0671391	-0.0696501	-0.0139532	-0.00995032	-0.0146355	-0.00292437	0.0427677	0.0396854	0.0450253	0.0876219	0.0712837	0.0759916	0.111143	0.0809393	0.0982077	0.107081	0.100337	0.084725	0.103807	0.114009	0.10266	0.10541	0.0955551	0.0560349	0.0750021	0.0504179	0.0491869	0.0414751	0.047647	0.0307301	0.0182169	0.0150223	0.0348431	0.0334308
204	0.10153	0.177434	0.221424	0.218281	0.210619	0.226393	0.19656	0.135838	0.0937302	0.103224	0.0383803	0.032496	0.0179421	0.0669591	0.106077	0.105472	-0.0425238	0.0028003	0.00635437	0.0356512	0.0505897	0.0813538	0.104346	0.156033	0.181942	0.15011	0.191898	0.239723	0.231985	0.240584	0.24947	0.24777	0.229351	0.236676	0.24653	0.218138	0.202648	0.17497	0.0934265	0.110772	0.051899	0.0188248	-0.0213303	-0.0388583	-0.0682352	-0.0806598	-0.0978939	-0.0749915	-0.0591655
205	0.0681358	0.136712	0.170441	0.164545	0.180726	0.213382	0.203345	0.157438	0.140173	0.15127	0.101685	0.0971017	0.0904927	0.118419	0.152327	0.163977	0.0270058	0.0655145	0.0916088	0.103978	0.104506	0.168663	0.19408	0.207032	0.246904	0.234722	0.245632	0.274145	0.252706	0.250832	0.254426	0.23735	0.210092	0.209971	0.23295	0.238082	0.231087	0.214546	0.159322	0.185211	0.129258	0.108063	0.0678681	0.0547956	0.0171071	-0.0197748	-0.0472655	-0.00892952	-0.00104379
206	0.0410952	0.0982828	0.128175	0.135923	0.162681	0.190205	0.195086	0.167965	0.174364	0.180944	0.141405	0.13222	0.128797	0.131168	0.15236	0.157522	0.0356018	0.0788967	0.101336	0.0982063	0.112816	0.184956	0.184157	0.179452	0.237015	0.226452	0.201396	0.232792	0.194905	0.200328	0.199407	0.172341	0.153178	0.166083	0.197224	0.207259	0.21601	0.212416	0.179999	0.203582	0.160905	0.152916	0.128033	0.118755	0.0891913	0.051677	0.0341683	0.0733295	0.0740884
207	0.0876189	0.167882	0.207999	0.211222	0.222237	0.248083	0.247674	0.202879	0.18595	0.189472	0.125981	0.114433	0.098236	0.121443	0.150756	0.151129	0.0206441	0.0634782	0.0707518	0.0957879	0.128302	0.173821	0.173546	0.213989	0.260087	0.229964	0.226879	0.276637	0.253311	0.262542	0.25684	0.236075	0.218354	0.231257	0.262094	0.25416	0.258739	0.246032	0.184514	0.202777	0.147183	0.117576	0.0820473	0.0568886	0.0211362	-0.00699587	-0.0262262	0.0132254	0.0311298
208	0.108	0.196335	0.238899	0.225342	0.236721	0.268978	0.271038	0.217688	0.201608	0.204218	0.132545	0.130032	0.117616	0.159668	0.194418	0.193311	0.0681251	0.0977368	0.113823	0.141395	0.160491	0.216007	0.240164	0.275186	0.314959	0.293187	0.295897	0.336648	0.31988	0.323542	0.320303	0.294772	0.271095	0.277389	0.306834	0.306909	0.303222	0.286417	0.217272	0.243582	0.175245	0.138724	0.0900462	0.0601107	0.0117958	-0.0291692	-0.0615922	-0.0147405	0.00336999
209	0.140851	0.239524	0.291891	0.260405	0.249439	0.277816	0.257127	0.185612	0.141127	0.142279	0.0485293	0.05328	0.0433356	0.114355	0.17175	0.166731	0.0357605	0.0653905	0.0860559	0.137443	0.143459	0.178921	0.230126	0.291548	0.303772	0.274475	0.31809	0.35931	0.363322	0.358441	0.361954	0.351345	0.324088	0.325916	0.338438	0.323517	0.292528	0.260344	0.170729	0.186885	0.0928996	0.0454936	-0.0146639	-0.0419971	-0.0937393	-0.122059	-0.159824	-0.12041	-0.0968901
210	0.120296	0.186422	0.225119	0.184542	0.183346	0.220081	0.20521	0.136545	0.0933043	0.0972504	0.0240102	0.0322891	0.0283002	0.0817478	0.134519	0.155253	0.0416305	0.0510153	0.0893192	0.132253	0.127766	0.166242	0.223982	0.27794	0.283786	0.262989	0.308542	0.338038	0.340073	0.31716	0.322487	0.31544	0.270458	0.261344	0.279532	0.286596	0.250772	0.219587	0.140917	0.161874	0.0736226	0.0329856	-0.0170458	-0.0347758	-0.0888069	-0.12579	-0.162885	-0.128399	-0.114926
211	0.0730873	0.120948	0.146116	0.110896	0.105014	0.142056	0.127553	0.070187	0.0324963	0.0359402	-0.010736	0.00247145	-0.00108058	0.0485772	0.083178	0.114179	0.0473327	0.0246067	0.0550506	0.0827917	0.0807419	0.108304	0.160656	0.202744	0.198131	0.188379	0.239064	0.25457	0.259433	0.228417	0.236582	0.233729	0.19542	0.180709	0.193818	0.205894	0.167716	0.141338	0.088419	0.0983699	0.0300773	-0.000337646	-0.0371372	-0.0510599	-0.091375	-0.119216	-0.154751	-0.136363	-0.122967
212	0.0972538	0.139283	0.160133	0.125301	0.1038	0.139282	0.112807	0.0466669	0.0028712	0.00380709	-0.0468895	-0.033504	-0.0334243	0.0274493	0.0704788	0.0972038	0.0299144	0.0168715	0.049721	0.0875486	0.0729868	0.0855379	0.151723	0.199753	0.18099	0.171078	0.237913	0.2527	0.267482	0.231977	0.237858	0.234949	0.202753	0.186354	0.194577	0.20161	0.153588	0.120242	0.0569277	0.0673211	-0.00411963	-0.0355584	-0.0797944	-0.0923873	-0.134885	-0.157774	-0.189284	-0.174252	-0.163672
213	0.162704	0.23398	0.270821	0.22224	0.192598	0.234894	0.195926	0.114871	0.0540042	0.0511754	-0.0383021	-0.0283097	-0.0363758	0.0420422	0.110876	0.104102	0.0253456	0.0460149	0.0899847	0.156001	0.144395	0.152674	0.22994	0.296967	0.270189	0.248356	0.324414	0.348335	0.374678	0.350584	0.358698	0.351815	0.319192	0.30809	0.312465	0.308909	0.250275	0.215936	0.120822	0.122003	0.0186839	-0.0330033	-0.102113	-0.122494	-0.18633	-0.218466	-0.250679	-0.219826	-0.206061
214	0.175721	0.275168	0.330982	0.287606	0.25042	0.278117	0.228583	0.138617	0.0657368	0.0574227	-0.0471623	-0.0453125	-0.0509057	0.0506366	0.129019	0.112563	-0.0137247	0.027084	0.0429697	0.12055	0.117901	0.125028	0.198395	0.291695	0.274124	0.238277	0.322074	0.364591	0.393022	0.37523	0.382521	0.386691	0.364432	0.352839	0.349304	0.324362	0.267754	0.226702	0.111915	0.112857	0.0013792	-0.0574831	-0.130787	-0.155666	-0.212913	-0.232117	-0.263723	-0.234844	-0.215087
215	0.175985	0.274486	0.32377	0.2733	0.221064	0.240088	0.17666	0.0805638	-0.0117238	-0.0198597	-0.124743	-0.11512	-0.114668	0.0101278	0.102931	0.0905588	-0.0466619	-0.00291755	0.00227183	0.0849133	0.0730341	0.0684321	0.149043	0.250916	0.225851	0.188354	0.285624	0.328019	0.363184	0.339159	0.349456	0.36754	0.3497	0.334655	0.310948	0.280112	0.209286	0.158724	0.0331822	0.0366134	-0.0784872	-0.136855	-0.210496	-0.230773	-0.277587	-0.284528	-0.317344	-0.301605	-0.279878
216	0.173949	0.252551	0.285341	0.219363	0.16346	0.190502	0.121159	0.0216828	-0.078646	-0.0758362	-0.180083	-0.151719	-0.141643	-0.0156058	0.106112	0.105197	-0.00638565	0.0191447	0.026787	0.108935	0.0731793	0.0644309	0.166222	0.253427	0.220154	0.189949	0.289226	0.316972	0.354701	0.31773	0.327068	0.35276	0.331103	0.310434	0.275542	0.250771	0.169458	0.118509	-0.0115729	0.000884347	-0.120075	-0.174906	-0.256086	-0.269416	-0.320102	-0.331678	-0.367348	-0.358472	-0.344707
217	0.151944	0.20454	0.219616	0.155093	0.0957427	0.112307	0.0375078	-0.0488372	-0.147486	-0.133121	-0.221687	-0.192704	-0.17922	-0.0522651	0.051217	0.0713806	-0.0480596	-0.029541	-0.0255254	0.0415652	0.000291985	-0.0109829	0.0818578	0.153158	0.117664	0.0931185	0.198928	0.218599	0.252674	0.212189	0.225428	0.258384	0.244256	0.225606	0.18455	0.15295	0.0746558	0.0240598	-0.09439	-0.0752473	-0.175783	-0.219093	-0.290732	-0.299224	-0.334214	-0.331632	-0.357425	-0.36152	-0.349255
218	0.149442	0.186262	0.187402	0.124671	0.0425618	0.0435019	-0.0437981	-0.126711	-0.24754	-0.245751	-0.341494	-0.308981	-0.292753	-0.151563	-0.0486924	-0.0332376	-0.128355	-0.113062	-0.113138	-0.0333268	-0.0763944	-0.114196	-0.0223274	0.064268	0.00657364	-0.0206457	0.101048	0.108364	0.167023	0.129693	0.147789	0.199012	0.198116	0.173257	0.111369	0.061995	-0.0259882	-0.0812929	-0.200778	-0.208649	-0.305947	-0.350571	-0.412161	-0.409932	-0.432292	-0.405136	-0.420274	-0.444675	-0.426217
219	0.101965	0.107739	0.0887438	0.0285903	-0.0565984	-0.0645875	-0.151786	-0.22317	-0.337976	-0.334296	-0.400539	-0.363851	-0.342019	-0.212824	-0.129633	-0.107985	-0.163387	-0.169275	-0.170675	-0.107184	-0.157169	-0.200608	-0.113887	-0.048595	-0.112635	-0.12478	-0.00513886	-0.0160779	0.0406912	0.00736215	0.0339366	0.0927453	0.0976528	0.0713768	-0.00470249	-0.052085	-0.13739	-0.191945	-0.29291	-0.312374	-0.38409	-0.408335	-0.453407	-0.434429	-0.440407	-0.398348	-0.410184	-0.453168	-0.437412
220	0.0722283	0.0583342	0.0325113	-0.00470035	-0.10375	-0.129749	-0.217996	-0.279877	-0.391339	-0.402513	-0.456185	-0.426959	-0.410999	-0.296455	-0.226812	-0.219737	-0.248972	-0.251928	-0.26791	-0.210923	-0.245006	-0.312562	-0.245193	-0.181875	-0.259418	-0.268401	-0.146742	-0.163964	-0.105684	-0.119325	-0.077376	-0.0179461	0.00326365	-0.0148636	-0.0992084	-0.154591	-0.23409	-0.287976	-0.370033	-0.413692	-0.457188	-0.479741	-0.50363	-0.477408	-0.456967	-0.388522	-0.380965	-0.445981	-0.430213
221	0.0129944	-0.0285272	-0.0642177	-0.0816916	-0.164561	-0.190363	-0.270433	-0.314936	-0.405756	-0.413504	-0.425842	-0.400201	-0.388236	-0.31393	-0.278321	-0.269258	-0.25415	-0.273027	-0.287736	-0.260562	-0.2952	-0.35696	-0.306253	-0.283669	-0.355626	-0.344243	-0.242398	-0.272916	-0.229585	-0.227846	-0.17738	-0.125686	-0.0989799	-0.108223	-0.19234	-0.234371	-0.296869	-0.34	-0.388686	-0.438342	-0.448573	-0.447414	-0.443776	-0.405988	-0.367785	-0.294129	-0.279163	-0.351656	-0.342803
222	-0.0208917	-0.0762959	-0.11548	-0.116763	-0.192541	-0.229058	-0.306605	-0.33541	-0.421746	-0.429781	-0.425298	-0.402629	-0.397897	-0.34467	-0.323473	-0.315109	-0.28917	-0.307152	-0.324708	-0.317706	-0.355423	-0.400787	-0.367695	-0.368942	-0.426543	-0.407286	-0.332378	-0.360574	-0.330125	-0.315687	-0.257772	-0.20851	-0.17008	-0.16751	-0.254911	-0.295756	-0.344229	-0.383653	-0.411481	-0.467411	-0.460176	-0.446717	-0.428112	-0.380748	-0.326795	-0.2425	-0.217814	-0.297634	-0.293241
223	-0.0114389	-0.0630116	-0.09646	-0.0971882	-0.174784	-0.216695	-0.288796	-0.315247	-0.397378	-0.407412	-0.404361	-0.390119	-0.384489	-0.325104	-0.308088	-0.315143	-0.275882	-0.285996	-0.320874	-0.305356	-0.329278	-0.407614	-0.380978	-0.36019	-0.432313	-0.422388	-0.327677	-0.354708	-0.318798	-0.30264	-0.251425	-0.203001	-0.161052	-0.162471	-0.243971	-0.291008	-0.337823	-0.3751	-0.404148	-0.460124	-0.445024	-0.438192	-0.418941	-0.381494	-0.322527	-0.232607	-0.204112	-0.284314	-0.276575
224	0.0371556	0.00632289	-0.0208147	-0.0381504	-0.131004	-0.174358	-0.256001	-0.297694	-0.402794	-0.418582	-0.447426	-0.432408	-0.421471	-0.330279	-0.284034	-0.297703	-0.292544	-0.290216	-0.328264	-0.28019	-0.293355	-0.393143	-0.355029	-0.29253	-0.37533	-0.38232	-0.26008	-0.278739	-0.23131	-0.22454	-0.177514	-0.122962	-0.0888406	-0.0946522	-0.178792	-0.237809	-0.303271	-0.348864	-0.408852	-0.465317	-0.474135	-0.485212	-0.484046	-0.454601	-0.406098	-0.313661	-0.290427	-0.37027	-0.352636
225	0.0515437	0.0273242	0.00590078	-0.00671311	-0.107199	-0.15935	-0.245854	-0.290669	-0.406761	-0.426789	-0.464233	-0.451991	-0.444409	-0.346403	-0.292065	-0.308179	-0.332825	-0.313488	-0.36518	-0.314442	-0.321849	-0.418106	-0.383644	-0.31301	-0.384401	-0.397112	-0.28071	-0.288912	-0.244651	-0.232157	-0.183096	-0.123859	-0.0803447	-0.0805265	-0.169633	-0.240631	-0.303615	-0.354104	-0.422944	-0.479765	-0.494532	-0.510531	-0.510799	-0.481984	-0.430252	-0.331281	-0.302528	-0.383576	-0.364297
226	0.0511007	0.0269387	0.00954962	0.00983887	-0.0941417	-0.156426	-0.235922	-0.269129	-0.382195	-0.414345	-0.454666	-0.451104	-0.451714	-0.365106	-0.313415	-0.33966	-0.363805	-0.328694	-0.393136	-0.339549	-0.331045	-0.43667	-0.420904	-0.339503	-0.404278	-0.425472	-0.318864	-0.317156	-0.277972	-0.254326	-0.210193	-0.158609	-0.105472	-0.0978748	-0.180411	-0.259595	-0.311997	-0.358261	-0.421828	-0.488041	-0.490943	-0.511754	-0.503418	-0.477645	-0.41767	-0.309031	-0.27045	-0.35451	-0.332154
227	0.0718441	0.0642819	0.0528536	0.0371144	-0.0666232	-0.122794	-0.205296	-0.250239	-0.367109	-0.400326	-0.452502	-0.447172	-0.444653	-0.342383	-0.27463	-0.301211	-0.3278	-0.299564	-0.350388	-0.27975	-0.272096	-0.389647	-0.360014	-0.257443	-0.334251	-0.361234	-0.237247	-0.237068	-0.187605	-0.174936	-0.135293	-0.0834051	-0.0427623	-0.0442482	-0.123859	-0.20033	-0.264719	-0.31359	-0.39067	-0.458428	-0.478291	-0.507207	-0.512011	-0.495671	-0.449231	-0.348332	-0.320854	-0.398301	-0.371025
228	0.105808	0.113591	0.111114	0.0829363	-0.0248184	-0.0737887	-0.159773	-0.225615	-0.349939	-0.380298	-0.450278	-0.438499	-0.427276	-0.304428	-0.223265	-0.248997	-0.31065	-0.275753	-0.321001	-0.238691	-0.232431	-0.345678	-0.302906	-0.182914	-0.260144	-0.294264	-0.159393	-0.152832	-0.0968009	-0.0956357	-0.0595661	-0.00446847	0.0234405	0.016677	-0.0598492	-0.135189	-0.212651	-0.27225	-0.370619	-0.425071	-0.463542	-0.499819	-0.518823	-0.509054	-0.475054	-0.381628	-0.363468	-0.43277	-0.402876
229	0.120127	0.133253	0.136594	0.120411	0.0130358	-0.0421537	-0.131622	-0.196823	-0.324766	-0.356987	-0.433945	-0.43057	-0.420937	-0.302765	-0.218611	-0.256265	-0.345166	-0.27634	-0.335698	-0.252051	-0.232381	-0.342836	-0.31334	-0.189556	-0.252506	-0.295747	-0.176149	-0.156808	-0.109031	-0.0986988	-0.0656891	-0.0154197	0.0232041	0.0275413	-0.0433496	-0.129173	-0.196299	-0.254756	-0.364034	-0.412362	-0.452246	-0.491125	-0.507934	-0.500441	-0.461707	-0.364481	-0.336145	-0.404015	-0.373879
230	0.110837	0.126957	0.134664	0.122377	0.017806	-0.0385255	-0.123649	-0.178891	-0.303407	-0.342775	-0.412587	-0.417984	-0.411837	-0.298087	-0.223948	-0.272248	-0.345911	-0.274498	-0.339907	-0.254186	-0.232251	-0.349654	-0.327415	-0.204529	-0.260009	-0.306503	-0.191564	-0.165585	-0.121981	-0.106427	-0.0723063	-0.0261449	0.0190363	0.0267089	-0.0408648	-0.133978	-0.190413	-0.241188	-0.34149	-0.400242	-0.435126	-0.476304	-0.486322	-0.482291	-0.440159	-0.340782	-0.309948	-0.37886	-0.347704
231	0.12701	0.156444	0.171495	0.147075	0.0397921	-0.00571444	-0.0946594	-0.164724	-0.290797	-0.327698	-0.40802	-0.407251	-0.399911	-0.278474	-0.191184	-0.238678	-0.318025	-0.248766	-0.303969	-0.207827	-0.196162	-0.308536	-0.267036	-0.138047	-0.199359	-0.243947	-0.115183	-0.0900452	-0.0401569	-0.0329832	-0.00186025	0.0475521	0.0806183	0.0784094	0.00913422	-0.0772249	-0.147353	-0.203409	-0.312429	-0.36853	-0.419677	-0.463555	-0.487119	-0.488215	-0.455112	-0.361601	-0.346022	-0.409973	-0.375642
232	0.146876	0.184528	0.2032	0.176773	0.0722087	0.0292111	-0.0599064	-0.138785	-0.2629	-0.302139	-0.394144	-0.391756	-0.383261	-0.260038	-0.164509	-0.211428	-0.313377	-0.234678	-0.283621	-0.181578	-0.163268	-0.269838	-0.227729	-0.0898469	-0.152678	-0.201759	-0.0749491	-0.0449794	0.00587619	0.0112144	0.0393589	0.0861174	0.112291	0.110629	0.0466154	-0.0360296	-0.108097	-0.16785	-0.284006	-0.339192	-0.398215	-0.447454	-0.477811	-0.479207	-0.455779	-0.373407	-0.357938	-0.411308	-0.379037
233	0.150522	0.185188	0.200917	0.16112	0.0548239	0.0179703	-0.0704454	-0.156321	-0.281482	-0.312744	-0.403484	-0.39362	-0.386262	-0.266289	-0.161019	-0.203691	-0.290744	-0.231308	-0.257452	-0.154536	-0.144444	-0.245615	-0.190734	-0.0583843	-0.134399	-0.174707	-0.0398229	-0.0234102	0.0388349	0.0371237	0.0652131	0.116137	0.134465	0.122947	0.0556202	-0.016629	-0.104289	-0.168472	-0.28762	-0.341096	-0.405141	-0.452049	-0.485896	-0.480441	-0.465274	-0.390979	-0.391211	-0.442717	-0.40822
234	0.169323	0.211661	0.231973	0.201764	0.0896812	0.0470139	-0.052385	-0.147064	-0.289511	-0.317362	-0.423482	-0.412391	-0.412186	-0.283966	-0.168359	-0.210896	-0.317344	-0.246119	-0.281248	-0.171861	-0.162541	-0.24939	-0.191256	-0.0584977	-0.124	-0.169162	-0.0415073	-0.0126086	0.0492141	0.0532679	0.0815431	0.137604	0.161539	0.153163	0.0796506	-0.00338363	-0.0891195	-0.157563	-0.291695	-0.343417	-0.421372	-0.473528	-0.512865	-0.501026	-0.492808	-0.423539	-0.424194	-0.471616	-0.440041
235	0.179505	0.233575	0.263369	0.250604	0.146927	0.0983337	-0.00534707	-0.0981814	-0.232138	-0.255279	-0.368578	-0.36874	-0.375075	-0.245421	-0.139891	-0.178873	-0.325156	-0.226118	-0.286496	-0.179233	-0.167948	-0.235316	-0.185425	-0.0584402	-0.0906052	-0.146209	-0.0435441	0.0145588	0.0630569	0.0751256	0.0994062	0.147516	0.179376	0.183782	0.111734	0.021774	-0.0488655	-0.115803	-0.251824	-0.281893	-0.358902	-0.418263	-0.457437	-0.445751	-0.441955	-0.383659	-0.377823	-0.411433	-0.388033
236	0.144402	0.177133	0.193149	0.192652	0.0919048	0.0397591	-0.060211	-0.145884	-0.278914	-0.295576	-0.390151	-0.38649	-0.391758	-0.278761	-0.182917	-0.206452	-0.37171	-0.269635	-0.325612	-0.242617	-0.236666	-0.287004	-0.248577	-0.152142	-0.174096	-0.213603	-0.123966	-0.0741509	-0.0380401	-0.0211685	0.0117586	0.0633009	0.100593	0.110965	0.0324254	-0.0539112	-0.116073	-0.182205	-0.307533	-0.329829	-0.394561	-0.437391	-0.465942	-0.447349	-0.427817	-0.360102	-0.341655	-0.386954	-0.370084
237	0.0875276	0.0865859	0.0846085	0.0846366	-0.00841071	-0.0555289	-0.153409	-0.22293	-0.352579	-0.365465	-0.426296	-0.417209	-0.412122	-0.308609	-0.234426	-0.241194	-0.375834	-0.30981	-0.359122	-0.302484	-0.311013	-0.35493	-0.317104	-0.254419	-0.279472	-0.297487	-0.217864	-0.183997	-0.159033	-0.13762	-0.0914287	-0.0375608	0.00445608	0.0173447	-0.0704266	-0.14852	-0.208857	-0.272062	-0.374797	-0.402039	-0.446812	-0.469706	-0.482554	-0.45007	-0.413808	-0.335016	-0.313882	-0.374212	-0.363297
238	0.00156388	-0.0287383	-0.0491079	-0.0318984	-0.0997779	-0.140748	-0.226305	-0.260614	-0.359951	-0.362957	-0.376561	-0.364183	-0.364782	-0.304605	-0.276309	-0.251151	-0.333522	-0.323629	-0.362189	-0.354637	-0.381173	-0.385749	-0.366269	-0.358539	-0.360388	-0.356376	-0.322158	-0.301154	-0.296709	-0.266411	-0.211947	-0.162426	-0.109862	-0.0895952	-0.17554	-0.237799	-0.274854	-0.321085	-0.370414	-0.401178	-0.414729	-0.409976	-0.397451	-0.353662	-0.297977	-0.219212	-0.193342	-0.262528	-0.261007
239	-0.0465217	-0.104722	-0.142279	-0.123643	-0.194045	-0.230874	-0.303529	-0.310679	-0.391451	-0.412759	-0.408806	-0.396373	-0.400573	-0.36528	-0.36007	-0.337862	-0.320096	-0.348192	-0.371034	-0.384055	-0.403699	-0.40714	-0.392888	-0.412033	-0.434007	-0.405977	-0.389414	-0.408302	-0.390743	-0.36317	-0.305004	-0.257846	-0.19547	-0.180753	-0.267803	-0.317075	-0.34352	-0.37443	-0.377691	-0.451596	-0.445071	-0.434805	-0.411241	-0.357338	-0.297425	-0.216466	-0.180226	-0.255955	-0.257935
240	-0.0792514	-0.152781	-0.196134	-0.17038	-0.219808	-0.243866	-0.303352	-0.282978	-0.333625	-0.359652	-0.339006	-0.327679	-0.343936	-0.345433	-0.357497	-0.32099	-0.248584	-0.301619	-0.315214	-0.354685	-0.372256	-0.342437	-0.341808	-0.400268	-0.403635	-0.355995	-0.3877	-0.421043	-0.411879	-0.382963	-0.327564	-0.28443	-0.220008	-0.206665	-0.284965	-0.314919	-0.327475	-0.340644	-0.296502	-0.383295	-0.372316	-0.3521	-0.324354	-0.265898	-0.211158	-0.148868	-0.111958	-0.175991	-0.184174
241	-0.104007	-0.182973	-0.227282	-0.197718	-0.250837	-0.290404	-0.341389	-0.322285	-0.368529	-0.386191	-0.346749	-0.33528	-0.341701	-0.330335	-0.34959	-0.318527	-0.25618	-0.300494	-0.345813	-0.385608	-0.401652	-0.40444	-0.415642	-0.462103	-0.475154	-0.432172	-0.438102	-0.469339	-0.470773	-0.444075	-0.388585	-0.348686	-0.285105	-0.270978	-0.348993	-0.379133	-0.386495	-0.405781	-0.361354	-0.42885	-0.392772	-0.366866	-0.328173	-0.269224	-0.195831	-0.116084	-0.0744836	-0.15071	-0.156776
242	-0.0907013	-0.173192	-0.217427	-0.19095	-0.249978	-0.298972	-0.353852	-0.34731	-0.408635	-0.420259	-0.385749	-0.370389	-0.369548	-0.346666	-0.345188	-0.325123	-0.297467	-0.32021	-0.371443	-0.39478	-0.413784	-0.43887	-0.448463	-0.479175	-0.49746	-0.459981	-0.450836	-0.47515	-0.480762	-0.456945	-0.401732	-0.360997	-0.302353	-0.285755	-0.363919	-0.397424	-0.414091	-0.443215	-0.418773	-0.471209	-0.430823	-0.403126	-0.366994	-0.310998	-0.23263	-0.144677	-0.100982	-0.184178	-0.188381
243	-0.0468293	-0.113087	-0.150889	-0.129575	-0.204115	-0.260355	-0.332577	-0.343357	-0.432421	-0.446488	-0.439078	-0.425147	-0.423793	-0.374629	-0.352395	-0.35557	-0.339638	-0.333736	-0.387791	-0.39035	-0.410918	-0.453471	-0.450879	-0.458833	-0.492755	-0.467606	-0.430123	-0.451039	-0.443415	-0.414884	-0.355987	-0.312648	-0.246937	-0.227016	-0.31341	-0.365169	-0.394637	-0.433073	-0.444996	-0.501092	-0.479797	-0.465196	-0.434342	-0.381637	-0.305491	-0.20794	-0.163787	-0.253508	-0.252738
244	-0.0288108	-0.0813866	-0.106502	-0.0717995	-0.148579	-0.212422	-0.285681	-0.294531	-0.383143	-0.40004	-0.405497	-0.397748	-0.405752	-0.366561	-0.330583	-0.350263	-0.375278	-0.33392	-0.395952	-0.394495	-0.399309	-0.429618	-0.440604	-0.446765	-0.459771	-0.442063	-0.434423	-0.436956	-0.438348	-0.397302	-0.339276	-0.301665	-0.223651	-0.193118	-0.274451	-0.339762	-0.357554	-0.391781	-0.409933	-0.46622	-0.448813	-0.441453	-0.408594	-0.359739	-0.284136	-0.185886	-0.140802	-0.224972	-0.216823
245	-0.0366757	-0.0902912	-0.110517	-0.070106	-0.140799	-0.21144	-0.269749	-0.269039	-0.349293	-0.362211	-0.362175	-0.355374	-0.368216	-0.335262	-0.301474	-0.333931	-0.325359	-0.286144	-0.368486	-0.367388	-0.371083	-0.410697	-0.431956	-0.440117	-0.451259	-0.436722	-0.433188	-0.439073	-0.440456	-0.397318	-0.35073	-0.317031	-0.233571	-0.202849	-0.278797	-0.343219	-0.352201	-0.377513	-0.382659	-0.431237	-0.405697	-0.397492	-0.370284	-0.331879	-0.25357	-0.153655	-0.106991	-0.190187	-0.182694
246	-0.0217896	-0.0759596	-0.102474	-0.0765186	-0.159296	-0.22975	-0.297064	-0.312049	-0.40575	-0.42216	-0.426526	-0.417615	-0.421928	-0.363457	-0.327308	-0.352223	-0.341571	-0.311779	-0.387507	-0.372002	-0.385252	-0.444288	-0.44734	-0.435448	-0.470221	-0.458815	-0.420592	-0.430331	-0.420452	-0.389577	-0.338381	-0.296449	-0.222694	-0.201741	-0.284683	-0.345915	-0.375244	-0.412812	-0.434259	-0.486596	-0.465723	-0.462167	-0.43891	-0.398204	-0.321188	-0.216667	-0.172296	-0.263999	-0.255253
247	0.0133182	-0.0246544	-0.0419358	-0.0155797	-0.111451	-0.192103	-0.268571	-0.294714	-0.401442	-0.422791	-0.446219	-0.442361	-0.444893	-0.37629	-0.315755	-0.347747	-0.398606	-0.331542	-0.417856	-0.382943	-0.385939	-0.453829	-0.455965	-0.41751	-0.448584	-0.451572	-0.404795	-0.397569	-0.38689	-0.353086	-0.304016	-0.258593	-0.184262	-0.162024	-0.248058	-0.324123	-0.357981	-0.402509	-0.449642	-0.49561	-0.488692	-0.496161	-0.471537	-0.434135	-0.357577	-0.244043	-0.203534	-0.295562	-0.275244
248	0.0028298	-0.0378107	-0.0533643	-0.0163276	-0.0988582	-0.18291	-0.246216	-0.264553	-0.35356	-0.375643	-0.389596	-0.388951	-0.395111	-0.341528	-0.289977	-0.325106	-0.376686	-0.306786	-0.396854	-0.372358	-0.369455	-0.430022	-0.448945	-0.417674	-0.436581	-0.438019	-0.409641	-0.397911	-0.400494	-0.361651	-0.319366	-0.282089	-0.205903	-0.179073	-0.253586	-0.325618	-0.344204	-0.380209	-0.413387	-0.455417	-0.43719	-0.435691	-0.409709	-0.375152	-0.296938	-0.187495	-0.139059	-0.224701	-0.208684
249	-0.00273043	-0.0537974	-0.0730823	-0.0408583	-0.123696	-0.20707	-0.268612	-0.286704	-0.374381	-0.392173	-0.399949	-0.394992	-0.398521	-0.346198	-0.299564	-0.330973	-0.369241	-0.306731	-0.385754	-0.36461	-0.364518	-0.428312	-0.446766	-0.419268	-0.443857	-0.441966	-0.414341	-0.409496	-0.407569	-0.372965	-0.333461	-0.293861	-0.22043	-0.196104	-0.270366	-0.338858	-0.361001	-0.397215	-0.425183	-0.468196	-0.444155	-0.441996	-0.416945	-0.382848	-0.308569	-0.200059	-0.151351	-0.240098	-0.225528
250	0.0291997	-0.0110019	-0.03011	-0.0089215	-0.107598	-0.191745	-0.259423	-0.292716	-0.386104	-0.40945	-0.432086	-0.426563	-0.426569	-0.354409	-0.295933	-0.328204	-0.378742	-0.313716	-0.396657	-0.351895	-0.351224	-0.434273	-0.434588	-0.383799	-0.42451	-0.42862	-0.372336	-0.36682	-0.354411	-0.328553	-0.285432	-0.244385	-0.183462	-0.162438	-0.239254	-0.308365	-0.345031	-0.391839	-0.438051	-0.484361	-0.46878	-0.478257	-0.459667	-0.424894	-0.359616	-0.251429	-0.208418	-0.298022	-0.280566
251	0.0411082	0.012894	0.00097336	0.0284993	-0.0678507	-0.156847	-0.217225	-0.247681	-0.337056	-0.362386	-0.394893	-0.394835	-0.391441	-0.326929	-0.260695	-0.299946	-0.378783	-0.29487	-0.393418	-0.348373	-0.326659	-0.401976	-0.415318	-0.350132	-0.370541	-0.385697	-0.345951	-0.328402	-0.320952	-0.292578	-0.263472	-0.22278	-0.164891	-0.142011	-0.214322	-0.286961	-0.317301	-0.358516	-0.413202	-0.448888	-0.441635	-0.451636	-0.427526	-0.398922	-0.330711	-0.221929	-0.182154	-0.264859	-0.233854
252	0.0574696	0.036657	0.0211399	0.0336196	-0.072252	-0.153763	-0.218471	-0.252389	-0.352806	-0.373063	-0.42202	-0.419794	-0.407102	-0.330014	-0.255048	-0.282984	-0.385391	-0.306695	-0.410601	-0.346699	-0.330528	-0.407049	-0.400693	-0.325305	-0.350423	-0.360315	-0.303944	-0.288644	-0.273017	-0.254859	-0.223333	-0.169801	-0.124576	-0.110795	-0.193307	-0.267852	-0.30517	-0.355481	-0.428214	-0.461515	-0.465113	-0.479531	-0.454538	-0.420923	-0.356357	-0.248155	-0.214832	-0.297361	-0.264383
253	0.060386	0.0431182	0.0340143	0.0570402	-0.0422992	-0.123808	-0.192561	-0.222443	-0.315166	-0.341348	-0.390905	-0.394288	-0.391205	-0.32287	-0.271704	-0.28742	-0.407425	-0.322382	-0.427393	-0.369889	-0.353806	-0.418516	-0.417561	-0.344953	-0.360032	-0.378463	-0.329485	-0.291373	-0.277606	-0.253671	-0.22448	-0.165261	-0.117474	-0.102106	-0.182193	-0.259748	-0.285623	-0.334521	-0.394812	-0.431581	-0.429479	-0.454852	-0.424796	-0.387451	-0.327666	-0.234296	-0.192279	-0.257327	-0.245844
254	0.0162241	-0.0221306	-0.0330843	0.00548984	-0.0857291	-0.181164	-0.24189	-0.261409	-0.333426	-0.362351	-0.389366	-0.397466	-0.393284	-0.351319	-0.309062	-0.310081	-0.449068	-0.370795	-0.462526	-0.429232	-0.402401	-0.452555	-0.475954	-0.420107	-0.412453	-0.427768	-0.409145	-0.366882	-0.377083	-0.349941	-0.318292	-0.266668	-0.212019	-0.189319	-0.266592	-0.335936	-0.346597	-0.394286	-0.428524	-0.460896	-0.440235	-0.452399	-0.41327	-0.371692	-0.293334	-0.191662	-0.13209	-0.202439	-0.200244
255	-0.0138463	-0.0622362	-0.0793256	-0.0376457	-0.11698	-0.205255	-0.255562	-0.26838	-0.310897	-0.330224	-0.3395	-0.342626	-0.342091	-0.327763	-0.297093	-0.280644	-0.429266	-0.361845	-0.431312	-0.418198	-0.394365	-0.420095	-0.455809	-0.431048	-0.405475	-0.414042	-0.41991	-0.381109	-0.404225	-0.374412	-0.343056	-0.301429	-0.249543	-0.222148	-0.291952	-0.350855	-0.35406	-0.391865	-0.402524	-0.426427	-0.398913	-0.391245	-0.344615	-0.298946	-0.218262	-0.127063	-0.0735754	-0.138273	-0.134327
256	-0.0190251	-0.0640323	-0.0728809	-0.0222379	-0.0796287	-0.152036	-0.175861	-0.176952	-0.188856	-0.204346	-0.201266	-0.218825	-0.224827	-0.221108	-0.221792	-0.210828	-0.318778	-0.280691	-0.36489	-0.369073	-0.339054	-0.363896	-0.404678	-0.382066	-0.36051	-0.368464	-0.365165	-0.32625	-0.351768	-0.318313	-0.291779	-0.264077	-0.217081	-0.188516	-0.236674	-0.290727	-0.276036	-0.29754	-0.293145	-0.308793	-0.266485	-0.256283	-0.211479	-0.182519	-0.110951	-0.0334238	0.0223534	-0.0323571	-0.0263864
257	-0.0869682	-0.145798	-0.161578	-0.103773	-0.130218	-0.197103	-0.201293	-0.174049	-0.150015	-0.158105	-0.110996	-0.136527	-0.123033	-0.145808	-0.181714	-0.14509	-0.25004	-0.237939	-0.320665	-0.356092	-0.327938	-0.342855	-0.405673	-0.407868	-0.366658	-0.372518	-0.391067	-0.352888	-0.398667	-0.365105	-0.344749	-0.326278	-0.290363	-0.267666	-0.294656	-0.326466	-0.297951	-0.304231	-0.256823	-0.261787	-0.189777	-0.157747	-0.0952296	-0.063306	0.0144982	0.0863524	0.127412	0.0750565	0.0801241
258	-0.145019	-0.217973	-0.252648	-0.202408	-0.202063	-0.251961	-0.233733	-0.182956	-0.130489	-0.122745	-0.0322733	-0.0547548	-0.019623	-0.0569063	-0.131428	-0.0460084	-0.101812	-0.151462	-0.248289	-0.313812	-0.301566	-0.309962	-0.376749	-0.402892	-0.361327	-0.36138	-0.384621	-0.359903	-0.414359	-0.397371	-0.390598	-0.373046	-0.350628	-0.343093	-0.354735	-0.361661	-0.32055	-0.310102	-0.233692	-0.210078	-0.112306	-0.0621147	0.00379489	0.0378605	0.118125	0.169201	0.198474	0.154511	0.145129
259	-0.134088	-0.181173	-0.203378	-0.175006	-0.14122	-0.179039	-0.144231	-0.110392	-0.0581452	-0.00788735	0.0817194	0.0648682	0.107512	0.0748137	0.0108521	0.0921239	0.00377106	-0.0381259	-0.140345	-0.194937	-0.192645	-0.196917	-0.253511	-0.264373	-0.210359	-0.226008	-0.236431	-0.198572	-0.257143	-0.258102	-0.274521	-0.264914	-0.263366	-0.263453	-0.258809	-0.258861	-0.218343	-0.210514	-0.166567	-0.0729374	0.0095878	0.0626613	0.10897	0.12534	0.180061	0.206715	0.210335	0.189223	0.181462
260	-0.114673	-0.154825	-0.164346	-0.131632	-0.0971905	-0.138417	-0.099665	-0.0669561	-0.0174101	0.0329622	0.11181	0.0965054	0.131582	0.102914	0.0512777	0.0771435	0.00276999	0.00132006	-0.0866977	-0.121333	-0.11715	-0.143383	-0.208186	-0.21826	-0.178413	-0.203886	-0.206306	-0.168486	-0.220636	-0.212885	-0.232642	-0.233543	-0.23363	-0.220574	-0.204879	-0.211628	-0.167675	-0.156955	-0.130257	-0.0360396	0.0485172	0.094393	0.137991	0.154048	0.202655	0.225577	0.232662	0.213813	0.20902
261	-0.0809792	-0.108862	-0.114799	-0.0762338	-0.0622158	-0.114432	-0.0916156	-0.0663575	-0.0256198	-0.0136997	0.0267601	0.0170194	0.0498444	0.0413544	0.0262168	-0.0093901	-0.143411	-0.0785984	-0.165222	-0.178968	-0.146699	-0.175343	-0.240553	-0.235191	-0.199122	-0.221071	-0.215292	-0.187225	-0.226062	-0.201778	-0.214598	-0.210484	-0.197033	-0.174798	-0.178991	-0.207775	-0.17665	-0.174968	-0.144048	-0.106047	-0.0325534	0.00109716	0.046491	0.0707947	0.116047	0.152008	0.181504	0.15883	0.150645
262	-0.0675153	-0.0681491	-0.0720895	-0.0516692	-0.0171082	-0.0361607	-0.0173274	-0.012834	0.00786003	0.0292123	0.0433853	0.0342281	0.0685948	0.0424093	0.0600091	0.0482913	-0.116581	-0.0540715	-0.0646576	-0.0688552	-0.0349525	-0.034919	-0.0862978	-0.0765487	-0.0357444	-0.0568335	-0.0643242	-0.0372414	-0.0671802	-0.0605486	-0.070325	-0.0638304	-0.079501	-0.062884	-0.060129	-0.0694724	-0.0633956	-0.0673553	-0.0614723	-0.0203533	0.0041751	0.029712	0.0541149	0.0716004	0.0754542	0.0766749	0.0898563	0.0950999	0.0812828
263	-0.14881	-0.182126	-0.21011	-0.191874	-0.136104	-0.133434	-0.087156	-0.0545122	-0.00392651	0.00303466	0.0578933	0.0421096	0.109859	0.0460343	0.0104457	0.102193	-0.0586137	-0.0978157	-0.0593917	-0.105617	-0.074644	-0.0571577	-0.118101	-0.125474	-0.0899311	-0.0885486	-0.104734	-0.0924271	-0.129601	-0.146287	-0.156221	-0.153877	-0.201219	-0.197924	-0.165154	-0.14016	-0.127081	-0.120458	-0.0551319	-0.0281152	0.0210555	0.0637153	0.0945047	0.124411	0.1384	0.123499	0.13643	0.138197	0.109749
264	-0.131235	-0.191729	-0.236389	-0.226033	-0.178309	-0.176864	-0.0931861	0.00177773	0.099056	0.0891225	0.161311	0.12987	0.167423	0.126626	0.0299084	0.140827	0.234989	0.0803569	-0.012444	-0.0984631	-0.0469977	-0.0187987	-0.075049	-0.075971	-0.0406368	-0.0458609	-0.0716797	-0.0828917	-0.0925004	-0.131195	-0.184778	-0.166279	-0.192087	-0.235107	-0.213766	-0.180834	-0.137022	-0.0844923	0.0805604	0.0721188	0.132273	0.158937	0.184068	0.181419	0.187488	0.155295	0.171611	0.188469	0.16499
265	-0.130049	-0.20336	-0.253012	-0.261045	-0.221986	-0.216314	-0.136828	-0.0492793	0.0322467	0.0358488	0.0987814	0.0896891	0.140326	0.0948873	0.031412	0.133933	0.207369	0.0689221	0.0231786	-0.0420678	0.00268154	0.0194457	-0.0235797	-0.0271022	-0.017064	-0.0197934	-0.045841	-0.0694703	-0.0663845	-0.124148	-0.177173	-0.158133	-0.188179	-0.241065	-0.228321	-0.188888	-0.161714	-0.120408	0.0201712	0.0234585	0.0718816	0.0989222	0.120251	0.12477	0.136147	0.115809	0.108528	0.112574	0.0981833
266	-0.0977116	-0.154283	-0.191232	-0.199618	-0.176065	-0.18442	-0.133285	-0.039842	0.00278695	0.0234581	0.0758653	0.0920948	0.131845	0.120928	0.103504	0.108605	0.182103	0.14985	0.0356297	-0.0153045	-0.00393076	0.0192423	-0.00971124	-0.0369046	-0.0269735	-0.0251927	-0.0519448	-0.0778061	-0.0755347	-0.113627	-0.164745	-0.138796	-0.126984	-0.172608	-0.191362	-0.185444	-0.158513	-0.1149	-0.00479891	0.0141419	0.044049	0.0657382	0.0817029	0.0891828	0.116042	0.118067	0.0885043	0.0806445	0.0829677
267	-0.0963748	-0.150597	-0.173836	-0.185066	-0.160581	-0.166059	-0.113448	-0.0375516	0.00452884	0.0656492	0.134271	0.158626	0.210286	0.183838	0.166662	0.163475	0.208127	0.201857	0.100481	0.0544974	0.0280471	0.0331614	0.00958326	-0.0360735	-0.0335752	-0.033186	-0.0422545	-0.0635053	-0.0692268	-0.102063	-0.159141	-0.144607	-0.132381	-0.170553	-0.176622	-0.175996	-0.147103	-0.102722	-0.0418236	0.0382475	0.0753727	0.124096	0.148765	0.156505	0.203502	0.220725	0.178439	0.153334	0.167657
268	-0.119263	-0.174985	-0.195124	-0.197151	-0.156429	-0.162706	-0.101395	-0.0313668	0.0365658	0.130688	0.223565	0.244826	0.296266	0.241764	0.22248	0.227564	0.265525	0.255364	0.146674	0.097492	0.048268	0.0380515	0.0177304	-0.0467806	-0.0386422	-0.0357634	-0.0405134	-0.0574846	-0.0830897	-0.11177	-0.173216	-0.171013	-0.170684	-0.198098	-0.187897	-0.178253	-0.137959	-0.0923699	-0.0466262	0.0807819	0.137255	0.203702	0.242348	0.248865	0.306011	0.324734	0.276412	0.248196	0.266356
269	-0.0869099	-0.123978	-0.125205	-0.135646	-0.0874308	-0.0865077	-0.0202875	0.0444657	0.115795	0.225378	0.305307	0.341948	0.390534	0.329702	0.320559	0.288717	0.285753	0.334762	0.259579	0.227226	0.160657	0.146611	0.136945	0.0672851	0.0665505	0.066067	0.0567898	0.0351015	0.01287	-0.00805369	-0.0708813	-0.0799687	-0.0883959	-0.10736	-0.0828791	-0.0735741	-0.0339358	0.0107149	0.0367059	0.183331	0.217262	0.279036	0.308834	0.29708	0.345814	0.362002	0.288182	0.264744	0.299431
270	-0.0367329	-0.0524624	-0.0516711	-0.0646019	-0.0437211	-0.055818	-0.0150124	0.0369642	0.0712626	0.179935	0.228313	0.266979	0.27452	0.230903	0.240714	0.20249	0.174731	0.238591	0.177726	0.190962	0.107768	0.0739921	0.0832324	0.0491095	0.0367161	0.0225567	0.0291673	0.0234589	0.0196313	0.00938473	-0.0444162	-0.0456591	-0.03808	-0.0565858	-0.0500666	-0.0616306	-0.0305073	0.00348234	-0.00501923	0.132358	0.134099	0.172311	0.183106	0.158503	0.209083	0.242013	0.176686	0.14703	0.19659
271	-0.00595038	0.00894648	0.0316839	0.0290154	0.0520789	0.0447805	0.0907657	0.148512	0.187853	0.293819	0.298776	0.326714	0.317404	0.282382	0.278739	0.23261	0.225097	0.286021	0.217308	0.230633	0.167749	0.137759	0.140693	0.11797	0.101969	0.0752998	0.091856	0.0924471	0.0995936	0.102406	0.0436606	0.0351951	0.0444665	0.0310861	0.0504349	0.0290179	0.0627919	0.1109	0.0922639	0.223044	0.20597	0.223447	0.226009	0.185066	0.218386	0.244179	0.178812	0.166225	0.225951
272	-0.00313742	-0.0024813	0.0275914	0.067249	0.0347792	-0.00914304	0.00726186	0.063407	0.0672369	0.119964	0.110695	0.111848	0.0891537	0.0428008	0.0336257	-0.0165831	-0.0337514	0.0635814	-0.0322167	-0.00598569	-0.00427142	-0.0539314	-0.0729562	-0.0748892	-0.0889089	-0.118523	-0.0996238	-0.0862747	-0.0819332	-0.0535543	-0.0837682	-0.0839617	-0.0481849	-0.0443551	-0.0528756	-0.101104	-0.066431	-0.0443715	-0.0555179	0.0148608	0.026848	0.0310955	0.0609355	0.0473941	0.0957248	0.146345	0.135673	0.116226	0.155792
273	0.0247272	0.0529941	0.109403	0.174123	0.144832	0.0963557	0.128629	0.189252	0.214998	0.252227	0.230243	0.200967	0.163296	0.103774	0.067581	0.0135727	-0.00463513	0.0790488	-0.0191897	-0.0152574	0.00746789	-0.0412295	-0.0728916	-0.065578	-0.0607315	-0.0979221	-0.0876092	-0.0642494	-0.0686534	-0.0193122	-0.0449163	-0.0733261	-0.0186411	0.0111319	0.0243068	-0.0245622	0.0355405	0.0741843	0.071021	0.122917	0.142917	0.124971	0.158093	0.121892	0.170845	0.214981	0.214304	0.208587	0.257512
274	0.0235439	0.035817	0.104286	0.199026	0.167294	0.0949098	0.145367	0.22435	0.268818	0.271315	0.258249	0.194002	0.147556	0.05817	-0.00931783	-0.0527069	-0.0594005	0.00132038	-0.0856927	-0.0887517	-0.0290952	-0.0891511	-0.155943	-0.140113	-0.116196	-0.172217	-0.189559	-0.144906	-0.157407	-0.0924524	-0.121113	-0.168174	-0.0879976	-0.0439957	-0.0133602	-0.0716674	0.00862783	0.0562715	0.0759005	0.0948435	0.146886	0.123938	0.187857	0.155426	0.212392	0.266812	0.295218	0.286432	0.328387
275	0.0496841	0.0660879	0.146937	0.255074	0.185588	0.0643352	0.0678651	0.134497	0.144362	0.127196	0.105941	0.0403202	-0.0133036	-0.0681572	-0.115728	-0.162713	-0.174537	-0.117481	-0.21432	-0.191587	-0.124969	-0.205022	-0.272816	-0.225158	-0.207543	-0.275467	-0.284865	-0.219946	-0.224203	-0.148362	-0.170598	-0.195711	-0.088181	-0.044771	-0.0399473	-0.131407	-0.072461	-0.0414829	-0.0449317	-0.0519444	-0.00827348	-0.0392787	0.021193	0.000669144	0.0535551	0.124037	0.162844	0.139909	0.180518
276	0.0613044	0.0923462	0.187592	0.324479	0.256177	0.148738	0.143935	0.190297	0.191805	0.141189	0.104592	0.0171787	-0.0407432	-0.100496	-0.15312	-0.203939	-0.195959	-0.145361	-0.231285	-0.212376	-0.117296	-0.198921	-0.275453	-0.212218	-0.193719	-0.268163	-0.27746	-0.209543	-0.20417	-0.114177	-0.123899	-0.163971	-0.0578938	0.000556789	0.0166591	-0.0728384	-0.00977435	0.0145912	0.00784268	-0.0352393	0.00761176	-0.0323452	0.0340005	0.0132119	0.0552207	0.11411	0.164956	0.157071	0.192276
277	0.121553	0.200281	0.328847	0.466302	0.413937	0.320625	0.318327	0.346295	0.306128	0.249468	0.178609	0.0933801	0.0204925	-0.0321393	-0.0759311	-0.141162	-0.11591	-0.0635641	-0.133208	-0.10117	-0.0157535	-0.0915739	-0.148887	-0.0734759	-0.0646084	-0.150035	-0.138062	-0.0696516	-0.0431265	0.055451	0.0465686	-0.00554923	0.0993118	0.1626	0.203296	0.102949	0.166208	0.199222	0.155398	0.100656	0.109154	0.0485562	0.0822741	0.0333023	0.0546632	0.092022	0.121179	0.128456	0.172957
278	0.159831	0.246177	0.366656	0.461089	0.370458	0.268626	0.22223	0.239915	0.165321	0.135404	0.0634908	0.00294248	-0.0763189	-0.0952721	-0.105364	-0.160567	-0.150841	-0.0940275	-0.163003	-0.105522	-0.0457192	-0.127145	-0.14814	-0.0660032	-0.0661682	-0.143733	-0.126974	-0.0537839	-0.0248822	0.0597934	0.0547684	0.0328626	0.15389	0.202767	0.203294	0.0826002	0.109877	0.129508	0.0529463	0.0089789	-0.0152859	-0.0778851	-0.0648149	-0.10763	-0.0881914	-0.0338246	-0.0241717	-0.0326374	0.0238347
279	0.15452	0.2262	0.322119	0.429278	0.325376	0.220267	0.133113	0.137018	0.0657808	0.0264241	-0.0416685	-0.105032	-0.166428	-0.16114	-0.1662	-0.213576	-0.20678	-0.160376	-0.239948	-0.187351	-0.126264	-0.200592	-0.222425	-0.138442	-0.137787	-0.204295	-0.184634	-0.119418	-0.0949122	-0.0132322	-0.0105338	-0.0159799	0.103979	0.150877	0.126689	0.0062373	0.0262682	0.0353769	-0.0402935	-0.101633	-0.12069	-0.176812	-0.150103	-0.167206	-0.147643	-0.0879263	-0.0585742	-0.0770146	-0.0345989
280	0.190812	0.302385	0.424488	0.553154	0.463563	0.375368	0.278662	0.235893	0.145747	0.0933307	-0.00675702	-0.0711875	-0.132078	-0.130487	-0.12912	-0.181277	-0.159627	-0.10856	-0.169243	-0.111935	-0.04719	-0.124615	-0.144385	-0.0545845	-0.0610864	-0.136077	-0.106927	-0.0386056	-0.00284404	0.0976615	0.103401	0.0719921	0.18516	0.246784	0.250949	0.139293	0.167522	0.170591	0.0591658	-0.00990624	-0.0465272	-0.113435	-0.100564	-0.121821	-0.117875	-0.0810376	-0.0583487	-0.0577918	-0.0234868
281	0.303279	0.467386	0.62861	0.736649	0.617329	0.512649	0.416137	0.346508	0.208726	0.152012	0.0164697	-0.0427215	-0.113137	-0.0910721	-0.0641257	-0.132782	-0.101622	-0.0418839	-0.093784	-0.00640851	0.0530153	-0.0349193	-0.0340881	0.0820687	0.0589032	-0.0342391	0.0175126	0.0947301	0.154627	0.258146	0.265326	0.226406	0.350416	0.412381	0.430531	0.299358	0.309567	0.308271	0.150833	0.0762111	-0.00162823	-0.0918979	-0.110266	-0.152612	-0.169295	-0.143851	-0.143877	-0.133925	-0.0885712
282	0.335022	0.462476	0.607429	0.639831	0.471458	0.379464	0.286532	0.238135	0.0925631	0.0468575	-0.0807513	-0.121619	-0.184145	-0.130887	-0.0775582	-0.140292	-0.119766	-0.0559437	-0.108568	-0.00824104	0.0315351	-0.0654778	-0.0432874	0.0723972	0.0322894	-0.0493911	0.00535596	0.0726941	0.138936	0.222894	0.223278	0.214547	0.350761	0.384513	0.36846	0.226113	0.203433	0.206498	0.0554012	-0.0148687	-0.103012	-0.186211	-0.204293	-0.235307	-0.251298	-0.216728	-0.217006	-0.218556	-0.177791
283	0.409649	0.612213	0.752636	0.737877	0.569153	0.483942	0.394271	0.312528	0.128683	0.0753034	-0.0867321	-0.119578	-0.187144	-0.109503	-0.030999	-0.091704	-0.0632248	-0.00532881	-0.0315509	0.0868317	0.110475	0.0243528	0.0702238	0.197943	0.14941	0.0640687	0.135516	0.203372	0.284942	0.366399	0.38356	0.3701	0.492542	0.530369	0.519887	0.380026	0.33797	0.323737	0.134726	0.0541851	-0.076097	-0.176649	-0.229849	-0.272565	-0.312373	-0.28885	-0.305606	-0.300966	-0.254405
284	0.355237	0.586934	0.763636	0.755065	0.677643	0.598086	0.526996	0.436595	0.271908	0.220496	0.0653662	0.0278578	-0.0402867	0.00853007	0.0632244	-0.00509332	0.0353361	0.0846662	0.0636081	0.165865	0.1983	0.121215	0.156776	0.276944	0.236327	0.14831	0.215756	0.290361	0.369397	0.462146	0.476286	0.429505	0.537492	0.587404	0.625376	0.494178	0.476653	0.470777	0.276533	0.210003	0.0882933	-0.0100803	-0.0709647	-0.134729	-0.181621	-0.1828	-0.211325	-0.189733	-0.140823
285	0.269831	0.440591	0.612328	0.606282	0.52838	0.461552	0.408496	0.376881	0.229146	0.195137	0.0726081	0.0415262	-0.0263494	0.0149765	0.0595444	-0.00758822	0.0359151	0.0887729	0.0498042	0.151789	0.178311	0.0861321	0.120432	0.230076	0.176322	0.0897265	0.154863	0.22883	0.30787	0.383472	0.36552	0.334597	0.46126	0.474813	0.503537	0.372462	0.355215	0.37714	0.217613	0.171865	0.0754616	-0.00921729	-0.0547557	-0.112216	-0.138572	-0.134247	-0.157809	-0.142321	-0.0981047
286	0.320866	0.486875	0.618903	0.570176	0.459839	0.428859	0.358612	0.303343	0.126131	0.102114	-0.0459129	-0.0559976	-0.11511	-0.0370737	0.0528022	0.0025202	0.0370354	0.0905219	0.0731594	0.193737	0.197526	0.109838	0.179988	0.295013	0.225603	0.144355	0.223683	0.289782	0.385413	0.429775	0.421453	0.426504	0.535223	0.522996	0.515644	0.392754	0.339222	0.342497	0.159579	0.111069	-0.0252504	-0.111928	-0.178846	-0.229858	-0.268649	-0.263784	-0.296901	-0.286989	-0.241798
287	0.332825	0.527006	0.656868	0.587457	0.518776	0.523283	0.464303	0.386594	0.21667	0.185719	0.0314875	0.0218296	-0.0335479	0.0454024	0.127286	0.0776563	0.107958	0.154676	0.146589	0.261095	0.260343	0.188351	0.262314	0.376218	0.312145	0.236357	0.32589	0.391323	0.486701	0.534443	0.541544	0.525171	0.608601	0.607039	0.629466	0.510427	0.463624	0.464546	0.272946	0.218873	0.073603	-0.0160455	-0.0985114	-0.163973	-0.220464	-0.233383	-0.277229	-0.251885	-0.20532
288	0.265339	0.438702	0.562863	0.506039	0.462167	0.459624	0.448048	0.409103	0.284992	0.280377	0.158356	0.144114	0.0841021	0.140814	0.201537	0.12463	0.195297	0.250696	0.228144	0.350522	0.360083	0.265424	0.323195	0.429916	0.359287	0.274993	0.351996	0.415867	0.504715	0.55342	0.518928	0.461833	0.539158	0.534689	0.581932	0.481822	0.463552	0.48672	0.313032	0.307793	0.192677	0.110281	0.0433505	-0.026479	-0.0783098	-0.106429	-0.15799	-0.122477	-0.0772262
289	0.22567	0.370178	0.468817	0.400664	0.362863	0.381329	0.366105	0.345191	0.229181	0.254681	0.141578	0.146281	0.098703	0.160816	0.220642	0.149119	0.273948	0.310828	0.307433	0.430938	0.425723	0.333631	0.4111	0.505688	0.407902	0.328041	0.410848	0.455432	0.561761	0.570455	0.508667	0.490785	0.54439	0.49499	0.517204	0.450437	0.406875	0.432681	0.284125	0.306122	0.191696	0.115771	0.0430138	-0.0230515	-0.0791733	-0.125703	-0.189921	-0.148873	-0.114779
290	0.228536	0.367414	0.440239	0.348613	0.311419	0.358683	0.329204	0.277376	0.163021	0.189662	0.0592185	0.0806321	0.0411192	0.124689	0.208726	0.177174	0.27059	0.293349	0.323721	0.458307	0.441146	0.364184	0.470688	0.582729	0.482211	0.414346	0.509989	0.548498	0.659369	0.631218	0.57064	0.580346	0.583639	0.511484	0.522656	0.479373	0.403135	0.410761	0.254454	0.272506	0.131351	0.055309	-0.0362732	-0.0962987	-0.169492	-0.215188	-0.28488	-0.245939	-0.210703
291	0.203429	0.341413	0.413633	0.32476	0.316866	0.3772	0.378711	0.323902	0.240565	0.28164	0.169071	0.189566	0.152954	0.214876	0.284242	0.248968	0.330539	0.366365	0.398379	0.525231	0.502461	0.437002	0.534605	0.642377	0.554781	0.478994	0.572458	0.620578	0.719129	0.694028	0.615938	0.589308	0.566159	0.508814	0.551293	0.520903	0.464738	0.478093	0.319467	0.367648	0.238726	0.171338	0.0789979	0.0114168	-0.0637231	-0.121478	-0.198297	-0.151195	-0.115966
292	0.198785	0.310078	0.363143	0.275902	0.262627	0.311712	0.303061	0.25841	0.174176	0.233921	0.129037	0.165985	0.132553	0.181409	0.271527	0.209859	0.281337	0.368867	0.433796	0.573599	0.542374	0.471723	0.558216	0.621137	0.529918	0.467398	0.526332	0.542272	0.629902	0.606711	0.533528	0.505617	0.487419	0.449247	0.473957	0.451494	0.394238	0.410542	0.256417	0.324709	0.194958	0.138027	0.0594468	-0.00239381	-0.0676349	-0.119232	-0.200609	-0.161177	-0.121046
293	0.158836	0.263727	0.306554	0.218011	0.203756	0.25857	0.249764	0.218454	0.134842	0.194509	0.110894	0.146743	0.110534	0.17915	0.239753	0.197055	0.321038	0.355218	0.403752	0.536091	0.486972	0.401816	0.505635	0.575795	0.455181	0.400856	0.497446	0.500223	0.60549	0.554843	0.479096	0.483305	0.461238	0.398408	0.412049	0.39317	0.328365	0.350418	0.22762	0.290501	0.170906	0.120497	0.0401828	-0.0172975	-0.0877553	-0.143755	-0.218904	-0.179352	-0.150656
294	0.149794	0.246762	0.282902	0.188102	0.181384	0.243696	0.242403	0.175866	0.112765	0.174045	0.0940199	0.141886	0.125446	0.202079	0.276376	0.247717	0.314589	0.348868	0.421458	0.545622	0.47246	0.403545	0.525031	0.591387	0.470567	0.442633	0.554565	0.542207	0.618846	0.551132	0.49569	0.480747	0.413556	0.368909	0.404004	0.413839	0.333501	0.337395	0.201742	0.27407	0.162194	0.124728	0.0379441	-0.0123593	-0.0810141	-0.136223	-0.207668	-0.17619	-0.150669
295	0.129952	0.227194	0.257728	0.159282	0.173834	0.250721	0.254788	0.207021	0.168797	0.237315	0.161776	0.218273	0.199406	0.257417	0.332382	0.296271	0.375368	0.45	0.542873	0.660196	0.585334	0.537314	0.653059	0.673775	0.563488	0.540594	0.600658	0.563578	0.634951	0.572068	0.506656	0.482657	0.426227	0.380959	0.414096	0.434357	0.37463	0.396111	0.286849	0.363179	0.244209	0.207474	0.118219	0.0597243	-0.018623	-0.087949	-0.177018	-0.134412	-0.10427
296	0.106147	0.184132	0.197722	0.114968	0.120119	0.181133	0.178922	0.150679	0.109654	0.168689	0.114537	0.15266	0.113614	0.143156	0.194684	0.155434	0.289537	0.357762	0.452979	0.576921	0.506684	0.422242	0.508053	0.527807	0.403595	0.369423	0.42984	0.392334	0.482432	0.441985	0.388396	0.368963	0.337153	0.299444	0.323051	0.339135	0.284961	0.308831	0.215947	0.267113	0.171582	0.134115	0.0748154	0.0318952	-0.0416887	-0.105739	-0.180098	-0.137588	-0.115078
297	0.084384	0.160444	0.1733	0.093852	0.0911213	0.148696	0.133141	0.0948184	0.0525987	0.100881	0.0518981	0.0995857	0.0654072	0.121797	0.151757	0.134362	0.251931	0.267056	0.343566	0.445394	0.357741	0.280189	0.384006	0.418956	0.271419	0.255377	0.377721	0.328053	0.420958	0.370068	0.333996	0.338955	0.298425	0.255294	0.277028	0.285022	0.222348	0.23992	0.152116	0.18558	0.102792	0.0766779	0.0198922	-0.0134554	-0.0757308	-0.130014	-0.178619	-0.147539	-0.142582
298	0.055251	0.125967	0.135083	0.0512883	0.0723519	0.155924	0.150287	0.096197	0.0757585	0.126844	0.0767156	0.136908	0.124722	0.179904	0.222805	0.221981	0.293016	0.313522	0.422997	0.496048	0.406555	0.388365	0.497773	0.489512	0.389872	0.408582	0.482556	0.415071	0.469903	0.404984	0.376188	0.373319	0.298594	0.261015	0.292296	0.33351	0.272866	0.282675	0.20079	0.245874	0.157663	0.140139	0.0682226	0.033163	-0.0363235	-0.102175	-0.160289	-0.126373	-0.121454
299	0.0160985	0.0541869	0.0412439	-0.0262368	0.00340324	0.0830385	0.0773621	0.0501271	0.0446069	0.0922114	0.0761358	0.123169	0.0972215	0.110009	0.129437	0.133975	0.242512	0.270601	0.399223	0.473378	0.370879	0.355842	0.460917	0.394289	0.305966	0.347607	0.377167	0.29486	0.337341	0.27979	0.258176	0.252345	0.19492	0.162357	0.188021	0.242412	0.198659	0.21594	0.177803	0.210903	0.14223	0.133694	0.0789575	0.0678007	-0.00192995	-0.0687185	-0.120399	-0.0823663	-0.087749
300	-0.0148022	0.0175637	-0.00395083	-0.0474059	-0.0307096	0.0213405	0.0059233	-0.0169667	-0.026349	0.0071906	0.00738583	0.0340999	0.00144565	0.00736874	-0.0109058	0.00147352	0.131521	0.129593	0.226341	0.281622	0.196195	0.153567	0.236898	0.194877	0.0818265	0.110155	0.190445	0.120247	0.174215	0.133018	0.127178	0.133306	0.0920689	0.0664414	0.0842625	0.121369	0.0859802	0.0965219	0.06334	0.0751992	0.0450001	0.0435431	0.0179294	0.0180091	-0.028098	-0.0772784	-0.0972646	-0.0713595	-0.0909338
301	-0.0252978	0.00163395	-0.0135033	-0.0507059	-0.0295298	0.0307486	0.00919723	-0.0263798	-0.034262	-0.00289761	-0.00487955	0.023443	0.0018098	0.0123919	-0.00398771	0.000993348	0.0981394	0.0941214	0.221306	0.253215	0.170095	0.150956	0.231329	0.186965	0.0784063	0.119048	0.204066	0.129804	0.170916	0.133854	0.144049	0.144996	0.0893571	0.0748934	0.097448	0.141477	0.100448	0.099744	0.0526393	0.0588359	0.0367652	0.0416647	0.0201888	0.0227232	-0.0217576	-0.0665875	-0.0793881	-0.0571557	-0.0820045
302	-0.061186	-0.0561121	-0.0860354	-0.104353	-0.0767047	-0.0234125	-0.0437155	-0.0580901	-0.0598933	-0.0488827	-0.0338785	-0.0185527	-0.0439322	-0.0592873	-0.104663	-0.0749232	0.0511823	0.0027916	0.139027	0.141556	0.0684859	0.0725163	0.137831	0.0705854	-0.02076	0.0340412	0.0892712	0.0173702	0.0455149	0.0180854	0.0398463	0.0424645	0.000117483	-0.00656157	0.0128374	0.06447	0.0340857	0.0359543	0.024535	0.00338596	-3.79413e-05	0.014496	0.00764841	0.0228296	-0.0177842	-0.0638987	-0.0578651	-0.0362918	-0.0715426
303	-0.0499481	-0.032349	-0.0554757	-0.082821	-0.0451256	0.02127	0.00199301	-0.0265444	-0.0237193	-0.00458236	-0.00323621	0.0178275	-0.00273037	-0.0142107	-0.0465989	-0.0253626	0.0906078	0.0551793	0.219169	0.20953	0.14347	0.175773	0.239116	0.170395	0.0970741	0.155376	0.188841	0.114361	0.135819	0.102394	0.121934	0.118608	0.0626217	0.0556082	0.0828852	0.138922	0.102411	0.101715	0.0799498	0.06229	0.0455765	0.053813	0.0357328	0.0382232	-0.0110337	-0.0623375	-0.0705664	-0.0437136	-0.0717052
304	-0.0450267	-0.0226467	-0.0499445	-0.0960149	-0.0497943	0.034212	0.0234721	-0.00240377	0.00333773	0.0304919	0.0310576	0.0608736	0.0433274	0.0323302	0.00667537	0.0534654	0.188616	0.129666	0.303626	0.289791	0.21693	0.269886	0.343311	0.261579	0.203049	0.2708	0.273859	0.194912	0.211926	0.164175	0.174485	0.170196	0.0991954	0.0841732	0.114534	0.18772	0.149622	0.155813	0.136872	0.135223	0.0955359	0.105208	0.0721043	0.0680088	0.00271359	-0.0643181	-0.087882	-0.0537689	-0.0784179
305	-0.071469	-0.0643129	-0.105559	-0.138264	-0.0920976	-0.0173433	-0.0219792	-0.0265584	-0.0176697	-0.00264439	0.0136239	0.0321389	0.000524598	-0.0304096	-0.084569	-0.00721907	0.181569	0.0725306	0.229244	0.204098	0.129495	0.185581	0.251427	0.152721	0.107552	0.184216	0.163617	0.0881957	0.100738	0.0627355	0.0789579	0.0790042	0.0254442	0.00905273	0.0336694	0.110864	0.0886279	0.101797	0.120727	0.0929608	0.0673885	0.0834919	0.0590007	0.0698363	0.00819433	-0.0627692	-0.073193	-0.038328	-0.0758245
306	-0.0850921	-0.0899485	-0.132355	-0.165415	-0.106608	-0.0222206	-0.0161096	-0.0196534	0.00690713	0.0182266	0.0373503	0.0608294	0.0459582	0.0040604	-0.0462734	0.0422338	0.196425	0.0883997	0.264417	0.207764	0.148161	0.240436	0.284609	0.168935	0.153545	0.238829	0.184616	0.105158	0.100628	0.060805	0.0781405	0.0748247	0.00984932	-0.00272179	0.0283679	0.116701	0.100253	0.113418	0.147101	0.120885	0.0999427	0.124585	0.096459	0.10263	0.0408943	-0.0319029	-0.0423802	-0.00466867	-0.0439357
307	-0.0649037	-0.0655853	-0.102269	-0.141165	-0.0765474	0.0148943	0.0229752	0.0137027	0.0450172	0.0677382	0.0800188	0.114019	0.116437	0.0805512	0.0668611	0.130047	0.218845	0.168517	0.341799	0.287934	0.242954	0.350065	0.388907	0.266983	0.266546	0.352574	0.278759	0.197076	0.182814	0.141484	0.148699	0.137328	0.0600155	0.0527964	0.0845555	0.174421	0.155652	0.168871	0.185221	0.185799	0.154264	0.175913	0.144327	0.142119	0.0799405	0.00479063	-0.0233003	0.0162534	-0.0114243
308	-0.0528653	-0.0431562	-0.0751414	-0.115351	-0.0535395	0.0335739	0.0368466	0.0362259	0.0614947	0.0888113	0.0940959	0.124438	0.103954	0.0741614	0.0630453	0.109019	0.267501	0.215256	0.364252	0.341508	0.282793	0.366093	0.418856	0.296372	0.290892	0.37515	0.286841	0.213034	0.206026	0.167197	0.165904	0.153453	0.0897119	0.0765732	0.107082	0.190841	0.173381	0.195778	0.212086	0.215284	0.171386	0.180626	0.144308	0.139047	0.0695235	-0.0126702	-0.0477255	-0.00572898	-0.0290396
309	-0.0736873	-0.0757398	-0.111546	-0.143848	-0.0840462	-8.51488e-05	0.00824504	0.0219847	0.0472154	0.058706	0.070528	0.0968343	0.0676311	0.0240815	-0.0061745	0.0574661	0.253164	0.16345	0.314902	0.279322	0.226446	0.318477	0.350257	0.223756	0.232804	0.318953	0.206106	0.136273	0.12966	0.100019	0.104713	0.0965484	0.0478441	0.0315642	0.0582313	0.140034	0.132305	0.159103	0.210031	0.179978	0.141516	0.152316	0.121608	0.126933	0.0571361	-0.0244637	-0.047762	-0.00452661	-0.0382954
310	-0.0888787	-0.0935427	-0.126123	-0.155381	-0.0765368	0.0221465	0.0418572	0.0492635	0.0933101	0.11451	0.127486	0.16115	0.172981	0.124802	0.116821	0.168116	0.26209	0.220363	0.389753	0.31972	0.299501	0.434182	0.435858	0.287221	0.327613	0.423815	0.284423	0.205039	0.174343	0.141522	0.142799	0.129386	0.0646548	0.0521294	0.0834788	0.172871	0.173135	0.199781	0.249663	0.244708	0.212872	0.236535	0.204752	0.201646	0.135505	0.0511849	0.0186312	0.0637243	0.0350935
311	-0.0609816	-0.0575039	-0.0815007	-0.113036	-0.0365672	0.0492736	0.0650927	0.0711913	0.116321	0.159504	0.167079	0.202707	0.231301	0.211563	0.260576	0.253735	0.279291	0.328378	0.453377	0.411551	0.382421	0.518902	0.532894	0.366753	0.428134	0.531222	0.363156	0.283219	0.239226	0.200839	0.1854	0.162787	0.106395	0.0956457	0.115143	0.197665	0.202717	0.230101	0.261106	0.307479	0.261258	0.281312	0.24632	0.233181	0.174419	0.0925346	0.038366	0.0817658	0.0719503
312	-0.0345821	-0.024688	-0.0480317	-0.0771814	-0.0263738	0.0434824	0.042502	0.0614024	0.083415	0.110107	0.111869	0.130547	0.102767	0.0886984	0.114388	0.109744	0.278503	0.278893	0.35411	0.358506	0.309107	0.391498	0.425293	0.29796	0.344626	0.418747	0.257537	0.201936	0.183274	0.163537	0.144665	0.129882	0.108071	0.0923038	0.0987261	0.159606	0.166551	0.198042	0.241049	0.244477	0.181078	0.179915	0.151712	0.145577	0.0828837	0.00887108	-0.0368671	0.00307351	-0.00353132
313	-0.059373	-0.0589569	-0.0868925	-0.115866	-0.0524378	0.0292435	0.0367382	0.0658226	0.0946809	0.112602	0.120165	0.141834	0.133784	0.097985	0.11004	0.140987	0.296706	0.263455	0.387811	0.345033	0.313287	0.429738	0.431618	0.291706	0.353077	0.42471	0.250612	0.179414	0.155364	0.135906	0.122019	0.108219	0.0881174	0.0700569	0.0800514	0.149273	0.158457	0.197268	0.265226	0.251384	0.193972	0.205143	0.176018	0.172818	0.104904	0.0246039	-0.0173923	0.025219	0.00986844
314	-0.0260532	-0.0213091	-0.0403079	-0.0661528	-0.0135026	0.0589512	0.0558094	0.0751356	0.0997618	0.114297	0.0959394	0.124201	0.148464	0.115515	0.180978	0.15663	0.197793	0.258706	0.380443	0.346929	0.356924	0.492868	0.475255	0.333973	0.41149	0.490896	0.307713	0.223595	0.187618	0.163729	0.148149	0.134409	0.111946	0.108667	0.10706	0.160306	0.163828	0.19592	0.242308	0.237985	0.167723	0.182627	0.154029	0.152636	0.0922436	0.0323711	-0.0092373	0.0228166	0.0177861
315	-0.00885415	-0.00551534	-0.0165031	-0.0408687	-0.00133493	0.0564541	0.0548529	0.0826395	0.0961783	0.113778	0.0906516	0.116254	0.135825	0.125092	0.207341	0.171907	0.222201	0.281341	0.34018	0.314475	0.324519	0.442075	0.431914	0.308049	0.394484	0.462573	0.283824	0.211432	0.172589	0.154152	0.131387	0.117439	0.121652	0.115219	0.103302	0.135938	0.143365	0.179654	0.228594	0.231289	0.152726	0.158561	0.128248	0.116433	0.0689735	0.0271455	-0.0261802	-0.0050231	0.0111893
316	0.0196417	0.0317191	0.0299529	-0.00232576	0.0222477	0.0661403	0.0702329	0.0884255	0.0997948	0.130836	0.0916574	0.131184	0.174614	0.196684	0.322296	0.273682	0.221692	0.325347	0.362072	0.343988	0.347637	0.461743	0.454648	0.347727	0.426179	0.487577	0.327191	0.25469	0.214116	0.188557	0.156848	0.144418	0.14668	0.137242	0.121937	0.143243	0.143912	0.17552	0.205891	0.240859	0.154667	0.159569	0.117165	0.0949342	0.0536866	0.022901	-0.0382597	-0.021448	0.00674535
317	0.0162423	0.043333	0.0460963	0.0157237	0.0617213	0.120125	0.138051	0.165426	0.190999	0.218467	0.187524	0.215776	0.237125	0.231655	0.315416	0.252126	0.31456	0.410689	0.458634	0.443876	0.473078	0.574083	0.537561	0.43225	0.508623	0.542978	0.37397	0.308893	0.282655	0.269438	0.224728	0.198903	0.198327	0.186666	0.187773	0.224089	0.232308	0.274402	0.314244	0.343072	0.2603	0.25543	0.21125	0.17376	0.117214	0.0615465	-0.00617639	0.029221	0.055761
318	0.000988163	0.0272565	0.0273104	0.0105721	0.0563181	0.107201	0.122915	0.159076	0.183578	0.197292	0.192929	0.191404	0.184049	0.167651	0.195564	0.132386	0.313573	0.357671	0.380116	0.368917	0.399645	0.460942	0.426046	0.3333	0.386046	0.399159	0.261259	0.217029	0.209372	0.214476	0.180292	0.15267	0.164455	0.156316	0.15793	0.193789	0.209526	0.250422	0.299034	0.295252	0.241599	0.229897	0.211342	0.18123	0.125101	0.0616965	0.0126307	0.0539884	0.0614266
319	-0.0332276	-0.0398608	-0.0622283	-0.0708761	-0.0262875	0.0253275	0.0324323	0.0750513	0.093152	0.101216	0.103135	0.107834	0.1093	0.0691132	0.117155	0.0879577	0.23926	0.261512	0.304475	0.272482	0.288459	0.383784	0.360488	0.228286	0.298185	0.355088	0.182507	0.114876	0.0909842	0.0871808	0.0713104	0.0535982	0.0695437	0.061212	0.053107	0.0991855	0.116167	0.153987	0.220472	0.209504	0.163379	0.172359	0.155153	0.149025	0.0993849	0.0427813	0.00855474	0.0396665	0.0347413
320	-0.064515	-0.0735689	-0.104859	-0.102517	-0.0499563	0.000461909	0.0134765	0.064136	0.0921371	0.0899851	0.116992	0.107524	0.0881403	0.0294613	0.0197194	0.00337117	0.221746	0.188705	0.240801	0.199801	0.201869	0.280843	0.263837	0.131604	0.179616	0.238606	0.101484	0.0411869	0.0254679	0.0269959	0.0210758	0.00102562	0.0168281	0.00924736	0.0129992	0.0658949	0.0895717	0.130449	0.214929	0.179394	0.16078	0.172956	0.167589	0.170216	0.124445	0.0617648	0.0471944	0.0830146	0.0573034
321	-0.0888935	-0.106699	-0.145181	-0.144932	-0.0808157	-0.020412	-0.00169571	0.044433	0.0820624	0.0774177	0.111407	0.109216	0.101733	0.0449028	0.00593234	0.0331313	0.220261	0.151076	0.23515	0.179189	0.156418	0.248352	0.240298	0.104612	0.15129	0.215728	0.0790717	0.0299797	0.0115133	0.00575179	0.0067975	0.00133796	-0.0110242	-0.0216195	-0.00582711	0.0599942	0.0826452	0.11762	0.209942	0.17308	0.164849	0.184712	0.177604	0.187575	0.138353	0.0651257	0.0549286	0.0997635	0.0589602
322	-0.0973989	-0.122992	-0.169918	-0.183264	-0.117457	-0.0444087	-0.0236797	0.0172633	0.0554693	0.0492343	0.08291	0.0922666	0.0809564	0.0271685	-0.0278993	0.0373578	0.235203	0.12521	0.239208	0.180901	0.142385	0.237707	0.246113	0.115933	0.146956	0.221925	0.0997394	0.0389494	0.0243314	0.00399074	0.0100028	0.00723884	-0.0260421	-0.04181	-0.0188343	0.0625317	0.0752323	0.107284	0.200139	0.156018	0.143517	0.169343	0.153308	0.16444	0.107464	0.0290747	0.0221408	0.0670796	0.0207932
323	-0.075832	-0.0976516	-0.140694	-0.161486	-0.110106	-0.0419564	-0.0317441	0.000282015	0.0154299	-0.000581342	0.0187147	0.0297281	-0.0019499	-0.0473558	-0.0975424	-0.0468543	0.186592	0.0713797	0.188458	0.148939	0.112042	0.182331	0.19831	0.0922469	0.0981941	0.159622	0.0652911	0.00636104	0.0130896	-0.00195527	0.0135583	0.017129	-0.00434149	-0.0209064	-0.00817118	0.0632794	0.0637561	0.0909927	0.16671	0.0980347	0.0756837	0.0901372	0.0726462	0.0886994	0.0283318	-0.0443559	-0.0444528	-0.00148694	-0.0488241
324	-0.075676	-0.10268	-0.146201	-0.159117	-0.117177	-0.0594189	-0.0555009	-0.0219195	-0.0165022	-0.0362384	-0.0175351	-0.0134756	-0.048163	-0.101124	-0.141041	-0.0915196	0.14333	0.0265084	0.129445	0.10512	0.0694327	0.126868	0.144659	0.0436298	0.0521772	0.11085	0.00430914	-0.0433803	-0.036292	-0.0416309	-0.0229343	-0.0219349	-0.0314545	-0.0423682	-0.0349642	0.0283461	0.0286171	0.0523498	0.124244	0.0502095	0.0301449	0.0433357	0.0329869	0.0608328	0.0092455	-0.0567398	-0.0554454	-0.0195162	-0.064142
325	-0.102739	-0.147961	-0.207052	-0.217169	-0.172698	-0.116989	-0.114946	-0.090184	-0.0701542	-0.0915496	-0.0658501	-0.0576926	-0.0788068	-0.148632	-0.188456	-0.0987698	0.0755972	-0.0510545	0.0839631	0.0543821	0.0133519	0.0823599	0.107777	0.00165454	0.0143963	0.0919752	-0.0225215	-0.0721465	-0.0864038	-0.104817	-0.0754931	-0.0813368	-0.120526	-0.12078	-0.10384	-0.0189121	-0.0269114	-0.0167746	0.056401	-0.0116312	-0.0180405	0.00998993	0.0017667	0.0409875	-0.00209509	-0.0587181	-0.045396	-0.0199511	-0.0725361
326	-0.0578676	-0.0815254	-0.128985	-0.149402	-0.114771	-0.0518663	-0.0652626	-0.0579933	-0.063123	-0.0835236	-0.07932	-0.0570087	-0.102939	-0.15403	-0.188058	-0.130523	0.0657063	-0.0399016	0.122788	0.112317	0.0705158	0.128126	0.16569	0.0727557	0.0583973	0.128254	0.045662	-0.0143563	-0.00871379	-0.0243965	0.0105564	0.00539065	-0.0288668	-0.025644	-0.0138784	0.0578052	0.0338804	0.0388169	0.0819879	0.00344254	-0.025405	-0.0106901	-0.0342294	-0.00595673	-0.0619908	-0.118879	-0.113802	-0.0850188	-0.129689
327	-0.0687313	-0.114175	-0.165323	-0.162745	-0.160485	-0.132649	-0.174115	-0.161994	-0.190127	-0.22118	-0.219317	-0.203358	-0.257476	-0.327054	-0.347071	-0.30822	-0.173394	-0.23141	-0.0791487	-0.0747568	-0.0971763	-0.0525121	-0.0248575	-0.109842	-0.121502	-0.0503648	-0.131806	-0.184873	-0.182667	-0.185377	-0.136124	-0.124047	-0.133541	-0.118484	-0.135161	-0.0905485	-0.116033	-0.126685	-0.095982	-0.194187	-0.206863	-0.184041	-0.177481	-0.119686	-0.143756	-0.157291	-0.12127	-0.123581	-0.165941
328	-0.125848	-0.202812	-0.274824	-0.264676	-0.260299	-0.245547	-0.278553	-0.273196	-0.274598	-0.306061	-0.277183	-0.256607	-0.251163	-0.323855	-0.33967	-0.228876	-0.262582	-0.330736	-0.184963	-0.212867	-0.244723	-0.185511	-0.171793	-0.253302	-0.244828	-0.164088	-0.243312	-0.28198	-0.312022	-0.329863	-0.274155	-0.2554	-0.29077	-0.273839	-0.285865	-0.22811	-0.249573	-0.274843	-0.235102	-0.301467	-0.276308	-0.232201	-0.200687	-0.117872	-0.113269	-0.111353	-0.0623779	-0.0850455	-0.137248
329	-0.045066	-0.0748811	-0.123545	-0.13452	-0.131731	-0.0943504	-0.139162	-0.151484	-0.184034	-0.201611	-0.206555	-0.176323	-0.19833	-0.238369	-0.228884	-0.189146	-0.14829	-0.17001	0.00136981	-0.00221671	-0.0430922	0.00484992	0.036946	-0.0399792	-0.057487	0.00616178	-0.0617011	-0.109377	-0.107953	-0.11332	-0.0672469	-0.0625485	-0.0841525	-0.0669823	-0.0798142	-0.0326158	-0.0725708	-0.0885354	-0.0879627	-0.14734	-0.172848	-0.160293	-0.162782	-0.104889	-0.137077	-0.168593	-0.152947	-0.148545	-0.188857
330	0.0441171	0.044273	0.0376394	0.0359027	0.00184816	0.00758797	-0.0673778	-0.0874874	-0.16662	-0.179262	-0.224148	-0.19109	-0.246188	-0.260787	-0.207496	-0.28674	-0.266504	-0.168966	-0.040693	0.000744051	-0.0197298	-0.00521919	0.0241445	-0.0240095	-0.0512744	-0.0164527	-0.0585111	-0.0930619	-0.0716783	-0.0456779	-0.00326634	0.00112064	0.0339061	0.0710145	0.0271998	0.0128611	-0.0326206	-0.0511863	-0.103621	-0.162405	-0.21518	-0.220374	-0.223445	-0.177208	-0.199622	-0.200544	-0.188279	-0.197115	-0.207477
331	-0.00940122	-0.0377517	-0.0569245	-0.0341284	-0.0846952	-0.11767	-0.192454	-0.213028	-0.281022	-0.29854	-0.31961	-0.291632	-0.302349	-0.328638	-0.260932	-0.310444	-0.467393	-0.338241	-0.24828	-0.220956	-0.23132	-0.221743	-0.213754	-0.249676	-0.251752	-0.215616	-0.253824	-0.265007	-0.274836	-0.248314	-0.197928	-0.182809	-0.145832	-0.100058	-0.156257	-0.184637	-0.213577	-0.252202	-0.300603	-0.33995	-0.350426	-0.333312	-0.300073	-0.229286	-0.201247	-0.157192	-0.119203	-0.163923	-0.173245
332	-0.0639711	-0.12102	-0.154096	-0.120973	-0.15906	-0.187322	-0.258049	-0.258337	-0.308139	-0.331893	-0.334188	-0.316209	-0.336401	-0.396179	-0.363467	-0.397812	-0.48603	-0.392898	-0.286768	-0.272945	-0.283684	-0.254322	-0.2494	-0.317617	-0.313028	-0.254946	-0.322353	-0.344915	-0.364618	-0.341481	-0.283504	-0.265698	-0.23354	-0.187259	-0.239608	-0.252665	-0.270638	-0.302727	-0.320474	-0.37844	-0.368921	-0.339866	-0.299454	-0.220156	-0.180561	-0.128674	-0.0753405	-0.124418	-0.144231
333	-0.124968	-0.220611	-0.269489	-0.218855	-0.254883	-0.305478	-0.354106	-0.334568	-0.350727	-0.382726	-0.350531	-0.338065	-0.336696	-0.398339	-0.394033	-0.344859	-0.457346	-0.44996	-0.401436	-0.430227	-0.441484	-0.403133	-0.42633	-0.487373	-0.459739	-0.398973	-0.466612	-0.474984	-0.517658	-0.503307	-0.449406	-0.416525	-0.386313	-0.354808	-0.403171	-0.412626	-0.40757	-0.43617	-0.403618	-0.456562	-0.403434	-0.361549	-0.303284	-0.220751	-0.143079	-0.069453	0.000960858	-0.06543	-0.0930253
334	-0.0623309	-0.13671	-0.158229	-0.10932	-0.161507	-0.227608	-0.288144	-0.276785	-0.322413	-0.358234	-0.361187	-0.355923	-0.382729	-0.419733	-0.398978	-0.402208	-0.469191	-0.425219	-0.385705	-0.384276	-0.377741	-0.361673	-0.39026	-0.425769	-0.40474	-0.371282	-0.431028	-0.427177	-0.454522	-0.419651	-0.371882	-0.338488	-0.286713	-0.250789	-0.307109	-0.342008	-0.34489	-0.373551	-0.37051	-0.430653	-0.400721	-0.386082	-0.343316	-0.283124	-0.215454	-0.136973	-0.0741527	-0.134165	-0.146081
335	-0.033989	-0.0922853	-0.108984	-0.0601516	-0.124907	-0.20027	-0.263626	-0.264206	-0.318905	-0.353453	-0.367291	-0.363997	-0.382541	-0.402223	-0.367386	-0.366673	-0.48139	-0.418519	-0.406144	-0.397249	-0.377443	-0.375508	-0.409535	-0.409018	-0.384254	-0.377051	-0.417295	-0.392815	-0.416859	-0.386884	-0.345095	-0.304925	-0.261059	-0.225736	-0.281948	-0.325446	-0.337252	-0.374664	-0.390393	-0.432849	-0.407955	-0.402228	-0.365477	-0.314855	-0.249084	-0.166574	-0.100513	-0.157661	-0.16633
336	0.0201773	-0.0141472	-0.00789837	0.0346482	-0.0323368	-0.110337	-0.164756	-0.161676	-0.237383	-0.2768	-0.306935	-0.315549	-0.360326	-0.355616	-0.331979	-0.357149	-0.379723	-0.331726	-0.343115	-0.309325	-0.273174	-0.305512	-0.339014	-0.308163	-0.300148	-0.317135	-0.3354	-0.302408	-0.304248	-0.268077	-0.240069	-0.209385	-0.152441	-0.123915	-0.17428	-0.230662	-0.243413	-0.272635	-0.296804	-0.347238	-0.339682	-0.355641	-0.337708	-0.316702	-0.268152	-0.197954	-0.147836	-0.189126	-0.183945
337	0.0603609	0.0567388	0.0828203	0.123289	0.063798	-0.0121222	-0.0554179	-0.067965	-0.144262	-0.181121	-0.222123	-0.238888	-0.293676	-0.286026	-0.259527	-0.303012	-0.342757	-0.267615	-0.267561	-0.223397	-0.173777	-0.210821	-0.244614	-0.189154	-0.182852	-0.221808	-0.238439	-0.189902	-0.184336	-0.144512	-0.125997	-0.106359	-0.0556506	-0.0303609	-0.063062	-0.120946	-0.130037	-0.160164	-0.203679	-0.239263	-0.248798	-0.278612	-0.265193	-0.263963	-0.238482	-0.185576	-0.149457	-0.170963	-0.159189
338	0.0422593	0.0437154	0.073468	0.101419	0.065708	0.00529584	-0.0297285	-0.0267903	-0.0847268	-0.110574	-0.148256	-0.15638	-0.206772	-0.204219	-0.175696	-0.237808	-0.252595	-0.167879	-0.146123	-0.10219	-0.0752054	-0.093405	-0.115411	-0.0873956	-0.0817098	-0.102365	-0.137624	-0.105628	-0.103564	-0.067687	-0.0598007	-0.0465799	-0.00523783	0.0070393	-0.0162733	-0.0590873	-0.0660526	-0.0857929	-0.122685	-0.144284	-0.161448	-0.178776	-0.174362	-0.179493	-0.167819	-0.13565	-0.129484	-0.134727	-0.109749
339	0.0129261	0.0108181	0.0308465	0.0562245	0.0191659	-0.026793	-0.0672506	-0.0706681	-0.112208	-0.138214	-0.171306	-0.179168	-0.218036	-0.235492	-0.211103	-0.250058	-0.306956	-0.230186	-0.18023	-0.131237	-0.111787	-0.113543	-0.136739	-0.119626	-0.101805	-0.11343	-0.16356	-0.13279	-0.13768	-0.106057	-0.0895987	-0.0761537	-0.0439674	-0.0276266	-0.0492179	-0.0865838	-0.0931935	-0.119132	-0.154023	-0.178225	-0.190235	-0.20303	-0.182189	-0.17239	-0.152484	-0.10413	-0.101636	-0.118427	-0.0861555
340	-0.0247136	-0.0354115	-0.0243307	0.00349765	-0.0271342	-0.0648224	-0.0983096	-0.0980422	-0.118657	-0.134689	-0.148208	-0.15735	-0.181485	-0.222074	-0.204798	-0.219127	-0.302489	-0.240834	-0.166842	-0.134069	-0.128906	-0.112111	-0.133108	-0.14453	-0.123674	-0.118295	-0.184317	-0.164427	-0.180453	-0.149073	-0.129576	-0.120575	-0.0902453	-0.0714381	-0.095536	-0.117945	-0.120984	-0.140339	-0.161947	-0.174476	-0.173622	-0.166568	-0.138287	-0.118918	-0.0943147	-0.0525321	-0.0569749	-0.0762398	-0.0456341
341	-0.0435594	-0.0791099	-0.0861523	-0.0562857	-0.090134	-0.129929	-0.170567	-0.1733	-0.188159	-0.201629	-0.199387	-0.201306	-0.203156	-0.247101	-0.220482	-0.220614	-0.353107	-0.277542	-0.198159	-0.183195	-0.188506	-0.164179	-0.184692	-0.218549	-0.196175	-0.173772	-0.245029	-0.233881	-0.260893	-0.237913	-0.210573	-0.195053	-0.166962	-0.143952	-0.177461	-0.191893	-0.196563	-0.220271	-0.234427	-0.240825	-0.225783	-0.209404	-0.175831	-0.135884	-0.100619	-0.0616991	-0.0515822	-0.0772879	-0.064787
342	-0.0578216	-0.0919272	-0.101002	-0.0740162	-0.0935476	-0.122499	-0.155701	-0.162505	-0.169468	-0.171568	-0.158212	-0.152004	-0.123505	-0.164118	-0.129387	-0.12492	-0.353262	-0.24381	-0.172938	-0.171751	-0.190968	-0.15996	-0.177828	-0.21349	-0.181642	-0.15922	-0.220839	-0.201051	-0.240696	-0.226923	-0.201141	-0.187875	-0.173222	-0.145856	-0.17537	-0.183065	-0.182902	-0.210942	-0.231497	-0.202769	-0.179992	-0.155142	-0.121704	-0.0795347	-0.0411668	-0.0116347	-0.000935899	-0.0201487	-0.019127
343	-0.0511579	-0.0779134	-0.0879178	-0.0583474	-0.0614511	-0.0816219	-0.103712	-0.107209	-0.112633	-0.103576	-0.0787306	-0.0736366	-0.0428524	-0.0844274	-0.0711697	-0.0746738	-0.302793	-0.189792	-0.115793	-0.116687	-0.135933	-0.134799	-0.151047	-0.184406	-0.167051	-0.151978	-0.181492	-0.160893	-0.196321	-0.17751	-0.160598	-0.167064	-0.159657	-0.124434	-0.138334	-0.139116	-0.131721	-0.150948	-0.170477	-0.133802	-0.10232	-0.0721838	-0.0429702	-0.00534045	0.022272	0.0349229	0.038473	0.030103	0.0248286
344	-0.063816	-0.0943243	-0.107971	-0.0720713	-0.0622343	-0.0646623	-0.0891984	-0.0868485	-0.0797169	-0.0613333	-0.0266727	-0.0227536	-0.00444968	-0.0676939	-0.0718394	-0.0616292	-0.239683	-0.151759	-0.0705455	-0.0966242	-0.130755	-0.0926603	-0.105887	-0.174203	-0.135569	-0.10502	-0.163703	-0.144249	-0.193864	-0.179826	-0.152144	-0.161889	-0.151971	-0.114609	-0.128518	-0.116582	-0.0971582	-0.112347	-0.123286	-0.0861179	-0.0512878	-0.0155105	0.0208208	0.0494812	0.0846462	0.102832	0.109483	0.0932379	0.0795317
345	-0.102297	-0.155969	-0.187647	-0.141301	-0.133386	-0.120902	-0.148377	-0.136799	-0.0990738	-0.10322	-0.0618938	-0.0523461	-0.0261187	-0.0921626	-0.119283	-0.0903402	-0.210911	-0.176924	-0.10133	-0.170791	-0.205745	-0.151395	-0.153952	-0.259988	-0.237119	-0.164852	-0.210825	-0.24534	-0.286471	-0.272622	-0.221939	-0.241273	-0.224501	-0.180198	-0.200869	-0.174256	-0.152877	-0.155425	-0.111798	-0.134065	-0.081348	-0.0335462	0.00324987	0.046285	0.0926079	0.12691	0.171781	0.130123	0.0979264
346	-0.0433781	-0.0533159	-0.0567622	-0.0403003	-0.0175403	-0.00959021	-0.0157239	-0.0100384	0.0264241	0.0492434	0.0683825	0.0869099	0.0939089	0.02664	0.0203289	0.0318513	-0.0755769	-0.00219424	0.0651326	0.0458473	0.0115397	0.0417315	0.0517056	-0.0138469	0.0145894	0.0322866	-0.0143168	-0.0069525	-0.0457691	-0.0553603	-0.047908	-0.0742235	-0.0713243	-0.0482679	-0.050533	-0.0137808	0.00549201	-0.00442673	-0.0112497	0.0397551	0.070415	0.0941086	0.107002	0.116471	0.125788	0.119485	0.114737	0.125804	0.102982
347	0.0394149	0.053156	0.0884262	0.0636045	0.0403731	0.0240704	0.0441339	0.0513271	0.0535463	0.0491751	0.0180925	0.0299687	0.032453	0.0309633	0.0879233	0.0139522	-0.0891852	0.0403643	0.0590169	0.119074	0.149442	0.123005	0.121134	0.155559	0.155042	0.12222	0.0962212	0.111124	0.116755	0.0969724	0.0760393	0.0679639	0.0681356	0.0600139	0.0577592	0.0531426	0.0469011	0.0353709	0.000538879	0.0319582	0.0217033	0.00236417	-0.00227668	-0.0317483	-0.0303602	-0.0104677	-0.0704075	-0.0754912	-0.0160382
348	-0.0122915	-0.0609413	-0.0643891	-0.0632773	-0.106149	-0.129408	-0.118875	-0.103719	-0.0872307	-0.106957	-0.11376	-0.100719	-0.0567567	-0.0351364	0.00454826	-0.0536475	-0.191776	-0.0884105	-0.100905	-0.0886774	-0.0617739	-0.0730706	-0.0948495	-0.0980805	-0.104712	-0.0827372	-0.104699	-0.142475	-0.144922	-0.144391	-0.134321	-0.131774	-0.1184	-0.112175	-0.137534	-0.155218	-0.156986	-0.157653	-0.134428	-0.157608	-0.136876	-0.126229	-0.104949	-0.108577	-0.0445073	0.0315558	0.0149199	-0.0582516	0.00128271
349	0.00749033	-0.0516237	-0.0699445	-0.0874634	-0.125908	-0.130298	-0.112066	-0.0953287	-0.0732073	-0.0749126	-0.0877637	-0.0641937	-0.00817285	0.00900016	0.0539204	0.0247365	-0.0698942	0.0203773	0.0109032	0.0252467	0.0465817	0.0418243	0.0346827	0.0313792	0.0230826	0.0359355	0.00718415	-0.0400248	-0.0316219	-0.0608174	-0.0706573	-0.063045	-0.0728649	-0.0884161	-0.116206	-0.109914	-0.122531	-0.121417	-0.0964473	-0.0942682	-0.0910991	-0.0840688	-0.0779436	-0.0901457	-0.0452121	0.00951992	-0.02604	-0.0816591	-0.0301861
350	-0.0173506	-0.0662428	-0.0896481	-0.115053	-0.127604	-0.129372	-0.0995757	-0.0664994	-0.0349231	0.00045951	0.017334	0.0414909	0.0743898	0.0947925	0.103444	0.0622272	0.0925771	0.147667	0.0925562	0.126828	0.130746	0.0822226	0.0920118	0.0918587	0.0498872	0.0485497	0.0654026	0.0137237	0.0334018	-0.0163417	-0.0500481	-0.046611	-0.0658323	-0.0989103	-0.114857	-0.100228	-0.106109	-0.089224	-0.057236	-0.0156816	-0.0010935	0.00713967	0.0201528	0.00984893	0.0341278	0.0595912	0.0275138	0.000572575	0.0296584
351	-0.0187918	-0.0362523	-0.0476138	-0.0811226	-0.0945223	-0.0864111	-0.0718381	-0.0592768	-0.0539396	-0.00612873	0.0100894	0.0301709	0.0226559	0.0439571	0.0431833	0.0157522	0.0971045	0.125164	0.0920161	0.170944	0.137693	0.0633042	0.109221	0.127678	0.0628879	0.0565837	0.113567	0.0706451	0.100841	0.0448823	0.000724629	0.00733084	-0.0220863	-0.0583192	-0.057197	-0.0442092	-0.0651373	-0.052008	-0.0573179	-0.00554069	-0.0103341	-0.00991722	-0.0105985	-0.0114491	-0.0143947	-0.0121504	-0.0325025	-0.0385943	-0.0242052
352	0.00980605	0.0122123	0.0103776	-0.0250565	-0.0520363	-0.0533725	-0.0541319	-0.0512491	-0.0653595	-0.0303376	-0.0246412	-0.00950063	-0.0225574	0.0198353	0.0286293	-0.00739506	0.0621704	0.0922205	0.0572564	0.140532	0.126412	0.0432094	0.0867969	0.136174	0.0573038	0.0332482	0.106656	0.0691841	0.118237	0.0689207	0.0261693	0.0406309	0.0292196	-0.0153578	-0.0217989	-0.0284714	-0.060425	-0.0480392	-0.0630163	-0.0284237	-0.0494702	-0.058947	-0.0620739	-0.0695102	-0.0801371	-0.0702471	-0.0900889	-0.0966043	-0.0764002
353	0.0358706	0.0361999	0.0279755	-0.0200299	-0.041813	-0.0323748	-0.0355151	-0.0328345	-0.0455168	-0.0281926	-0.0434287	-0.0208825	-0.0171662	0.0172738	0.058278	0.000942043	0.060456	0.104687	0.116327	0.1901	0.195196	0.127573	0.164853	0.20434	0.133036	0.113528	0.159517	0.118811	0.169278	0.120557	0.0863826	0.0879626	0.070699	0.0350827	0.0245089	0.0271072	-0.0160031	-0.011275	-0.0293417	-0.00800071	-0.0409463	-0.0511284	-0.0710751	-0.0813189	-0.0974114	-0.092177	-0.124445	-0.126512	-0.103259
354	0.0189462	0.00330849	-0.0178433	-0.0554088	-0.0704831	-0.0621192	-0.0702111	-0.0577275	-0.0769084	-0.0511555	-0.0627021	-0.0411614	-0.0282603	-0.00786079	0.0410246	-0.0119713	0.000488556	0.0547113	0.0801965	0.128466	0.149371	0.111943	0.129784	0.162525	0.106341	0.0838957	0.110178	0.0756734	0.124071	0.0764939	0.0355745	0.0629392	0.0518163	0.00874875	-0.0189225	-0.0220794	-0.0598813	-0.0586368	-0.0696113	-0.0386375	-0.0715958	-0.0708094	-0.0786876	-0.084486	-0.0895598	-0.0802905	-0.107987	-0.114975	-0.0958426
355	0.00579858	-0.0148577	-0.031524	-0.0555875	-0.0783505	-0.083074	-0.105127	-0.100869	-0.146902	-0.105017	-0.104928	-0.0725373	-0.0623381	-0.0366893	0.0219039	-0.00688862	-0.0706627	-0.0134407	-0.00632789	0.0422439	0.032253	-0.00295892	0.0144119	0.0501501	0.000426999	-0.0172366	0.017641	0.000110305	0.0416496	-0.00477814	-0.0422433	0.00927653	0.0119328	-0.0276784	-0.0622691	-0.0812128	-0.11561	-0.12228	-0.158692	-0.10117	-0.131797	-0.11859	-0.124813	-0.116456	-0.10322	-0.0823956	-0.10168	-0.122795	-0.111272
356	0.00713722	-0.0117587	-0.0274638	-0.0529769	-0.0850161	-0.0981867	-0.106773	-0.0811813	-0.108072	-0.0772775	-0.0778827	-0.0581732	-0.0507128	-0.0283791	0.0121274	0.00555469	0.0163062	0.0320546	0.000273298	0.0572708	0.0670693	0.0123533	0.0274195	0.0813754	0.0291973	0.0031425	0.041089	0.0166188	0.0605907	0.0116672	-0.0449451	-0.00855904	0.00142438	-0.048917	-0.0780497	-0.0950162	-0.124784	-0.121991	-0.124359	-0.0855915	-0.11042	-0.112184	-0.12397	-0.123398	-0.110934	-0.0853688	-0.107957	-0.128173	-0.109597
357	0.041385	0.0421748	0.0434594	0.000625434	-0.0372478	-0.0460672	-0.0638507	-0.0484949	-0.101032	-0.0516915	-0.070256	-0.0355167	-0.0243798	0.0109656	0.0802076	0.061058	0.0469181	0.0791252	0.0599951	0.130165	0.108276	0.0474763	0.0793286	0.125713	0.0654747	0.041247	0.0958637	0.0787111	0.127516	0.0828224	0.0306299	0.0631086	0.0783402	0.0275569	0.00435724	-0.0319791	-0.0715927	-0.0675297	-0.106539	-0.0523656	-0.101699	-0.102092	-0.125364	-0.135096	-0.124362	-0.0919192	-0.126042	-0.154144	-0.121142
358	0.0345752	0.0142911	0.0066955	-0.0290298	-0.0826578	-0.117822	-0.157463	-0.136034	-0.206425	-0.16476	-0.185546	-0.147981	-0.13618	-0.088712	-0.00736763	-0.0253156	-0.0679472	-0.0255469	-0.0686711	-0.00669449	-0.0231973	-0.0726082	-0.051791	-0.0026689	-0.0452553	-0.0721284	-0.0359651	-0.0342031	0.00814114	-0.0284615	-0.0707406	-0.0074668	0.0229992	-0.0235341	-0.0828155	-0.136242	-0.178413	-0.182785	-0.210756	-0.171901	-0.221768	-0.220685	-0.2381	-0.228619	-0.202256	-0.151641	-0.175753	-0.217977	-0.185013
359	0.007246	-0.0144381	-0.0180068	-0.036349	-0.0904177	-0.130779	-0.16164	-0.132695	-0.182286	-0.14841	-0.160915	-0.134332	-0.119244	-0.112158	-0.0434348	-0.0589976	-0.102383	-0.0711028	-0.0868933	-0.0284689	-0.0317691	-0.0863665	-0.0852484	-0.0521371	-0.0855837	-0.107788	-0.10443	-0.0987257	-0.0684403	-0.0869643	-0.122599	-0.0794847	-0.0390127	-0.0686707	-0.114525	-0.167302	-0.194623	-0.192017	-0.21114	-0.176029	-0.2079	-0.196165	-0.199427	-0.187079	-0.157962	-0.102126	-0.117072	-0.160626	-0.131399
360	-0.0252564	-0.0529891	-0.0714596	-0.0996683	-0.153661	-0.192792	-0.229478	-0.202699	-0.248239	-0.220698	-0.226486	-0.19429	-0.166192	-0.136161	-0.0545441	-0.0460485	-0.131194	-0.0941377	-0.145234	-0.0888126	-0.0971019	-0.127829	-0.128988	-0.0993092	-0.110096	-0.125244	-0.133612	-0.137546	-0.116558	-0.144405	-0.175168	-0.11767	-0.0783411	-0.112737	-0.176871	-0.220651	-0.248056	-0.257017	-0.264514	-0.225759	-0.255831	-0.243909	-0.253313	-0.237303	-0.19989	-0.144897	-0.165008	-0.213111	-0.185592
361	-0.0363516	-0.0631253	-0.0836292	-0.106624	-0.154428	-0.194508	-0.227822	-0.206971	-0.236474	-0.214103	-0.220004	-0.189722	-0.16129	-0.134101	-0.0571298	-0.0458128	-0.137775	-0.101095	-0.149671	-0.0931858	-0.0841185	-0.110795	-0.120764	-0.0885805	-0.0828766	-0.100263	-0.12725	-0.130474	-0.118344	-0.140705	-0.177825	-0.129735	-0.0981129	-0.12939	-0.186548	-0.221493	-0.23922	-0.250371	-0.253977	-0.212986	-0.235497	-0.227612	-0.239294	-0.230537	-0.198315	-0.152176	-0.171457	-0.209431	-0.188352
362	-0.0399566	-0.0723987	-0.0950844	-0.110094	-0.134976	-0.165394	-0.186739	-0.169172	-0.176489	-0.15463	-0.158028	-0.133741	-0.0962912	-0.0653112	-0.000950784	-0.0001162	-0.104719	-0.0501135	-0.0944987	-0.0536084	-0.0308238	-0.0402905	-0.0559015	-0.0402642	-0.0290784	-0.0400891	-0.0710634	-0.0800625	-0.0767661	-0.102688	-0.141617	-0.093774	-0.0777817	-0.111436	-0.163262	-0.183178	-0.191057	-0.199893	-0.1876	-0.143983	-0.155229	-0.143029	-0.157406	-0.155644	-0.140216	-0.11424	-0.133944	-0.155657	-0.141356
363	-0.0210723	-0.0357615	-0.0560317	-0.0686934	-0.102517	-0.145535	-0.161803	-0.167297	-0.167124	-0.13322	-0.130448	-0.112773	-0.0818476	-0.0490108	0.0204291	0.00350701	-0.101654	-0.0363429	-0.102707	-0.039813	-0.0155974	-0.0593027	-0.0681657	-0.0350528	-0.0246746	-0.0461006	-0.048407	-0.0472125	-0.0576297	-0.0813134	-0.12029	-0.102391	-0.0933008	-0.11528	-0.152158	-0.163064	-0.171395	-0.193294	-0.206369	-0.137048	-0.140514	-0.120718	-0.13756	-0.13994	-0.123799	-0.0919721	-0.111412	-0.132909	-0.108405
364	-0.0538521	-0.0721731	-0.100224	-0.11887	-0.14317	-0.185299	-0.201864	-0.206402	-0.213741	-0.155244	-0.133011	-0.102087	-0.071051	-0.0521449	0.0148158	0.00606147	-0.132962	-0.0703963	-0.125565	-0.0550572	-0.0734389	-0.118654	-0.12654	-0.106808	-0.100182	-0.11351	-0.108259	-0.0964432	-0.115002	-0.136969	-0.167132	-0.14587	-0.142165	-0.152715	-0.18484	-0.197523	-0.210258	-0.231341	-0.257589	-0.165972	-0.159763	-0.121628	-0.130512	-0.123284	-0.0915976	-0.0527625	-0.0781875	-0.111766	-0.0913175
365	-0.0735482	-0.110032	-0.144919	-0.165915	-0.185849	-0.223338	-0.240334	-0.240907	-0.254845	-0.207443	-0.194368	-0.149627	-0.104314	-0.0998718	-0.0214832	-0.0223403	-0.178795	-0.119003	-0.122843	-0.0690594	-0.0884603	-0.11594	-0.131688	-0.13414	-0.136789	-0.127053	-0.140744	-0.154064	-0.165766	-0.192344	-0.206019	-0.174628	-0.167708	-0.179837	-0.223509	-0.232134	-0.24841	-0.268981	-0.291676	-0.218607	-0.20665	-0.163414	-0.16525	-0.142811	-0.108298	-0.0681368	-0.0939911	-0.138931	-0.1249
366	-0.0676399	-0.102802	-0.131084	-0.142544	-0.150129	-0.181111	-0.201536	-0.202224	-0.2203	-0.176981	-0.165739	-0.124782	-0.0829133	-0.089681	-0.00764679	-0.0359383	-0.196027	-0.0895276	-0.0785381	-0.0299883	-0.0528041	-0.0746412	-0.0864051	-0.102568	-0.0987544	-0.0896824	-0.109987	-0.124728	-0.139839	-0.156706	-0.163284	-0.141634	-0.135935	-0.144999	-0.183222	-0.187208	-0.199119	-0.219897	-0.241958	-0.171825	-0.161225	-0.126532	-0.124244	-0.0974142	-0.0718611	-0.0439372	-0.0656242	-0.098463	-0.0928177
367	-0.075089	-0.115981	-0.149958	-0.165443	-0.15875	-0.180581	-0.19727	-0.189672	-0.214161	-0.155034	-0.126276	-0.0789837	-0.0530752	-0.0669728	-0.00261866	-0.0137551	-0.1285	-0.052655	-0.0654071	-0.024633	-0.072423	-0.0761663	-0.07227	-0.100693	-0.085368	-0.0731824	-0.0994288	-0.105056	-0.125316	-0.149118	-0.162074	-0.127633	-0.127788	-0.144415	-0.182732	-0.179732	-0.190601	-0.205101	-0.217831	-0.133654	-0.128833	-0.0869972	-0.0894068	-0.0606485	-0.0398919	-0.0207342	-0.0508227	-0.0776208	-0.0732317
368	-0.0923172	-0.137502	-0.176405	-0.193781	-0.191662	-0.20909	-0.223604	-0.224122	-0.26245	-0.198952	-0.165781	-0.122122	-0.0789218	-0.0578193	0.00076357	0.0215427	-0.129524	-0.0932196	-0.124786	-0.095098	-0.14926	-0.14523	-0.14541	-0.168274	-0.15231	-0.136074	-0.14581	-0.148345	-0.172955	-0.197523	-0.208437	-0.153234	-0.154105	-0.171305	-0.217545	-0.222477	-0.239745	-0.256817	-0.271344	-0.181843	-0.177018	-0.131753	-0.133921	-0.105438	-0.0722633	-0.0433622	-0.0737	-0.114453	-0.104989
369	-0.093124	-0.137493	-0.170039	-0.184145	-0.177847	-0.189718	-0.208196	-0.210947	-0.249843	-0.204758	-0.174575	-0.127391	-0.0806528	-0.0679045	-0.0119273	-0.0103201	-0.179213	-0.11737	-0.107646	-0.0880446	-0.138142	-0.135002	-0.137331	-0.170726	-0.166347	-0.140892	-0.147521	-0.163884	-0.186151	-0.203248	-0.193554	-0.155681	-0.14787	-0.157241	-0.197952	-0.202393	-0.220152	-0.239693	-0.249484	-0.186887	-0.177116	-0.13156	-0.12465	-0.0881068	-0.0563581	-0.0310032	-0.055427	-0.0945831	-0.0934769
370	-0.0703795	-0.116097	-0.144113	-0.149548	-0.131443	-0.132989	-0.156	-0.153032	-0.196232	-0.150486	-0.120182	-0.0732822	-0.050824	-0.061325	-0.0236589	-0.0351905	-0.140834	-0.0697259	-0.0593673	-0.0519569	-0.10906	-0.0902432	-0.0839244	-0.129945	-0.121726	-0.0933558	-0.106352	-0.119729	-0.140039	-0.1532	-0.141217	-0.105092	-0.0976602	-0.109695	-0.146237	-0.144782	-0.155761	-0.171604	-0.175164	-0.122249	-0.117407	-0.0779766	-0.0692366	-0.0292974	-0.0151387	-0.00569257	-0.0264979	-0.0502676	-0.0576487
371	-0.0740395	-0.119543	-0.151263	-0.16732	-0.150685	-0.145204	-0.163986	-0.15609	-0.212996	-0.158445	-0.121491	-0.0789302	-0.0618536	-0.0523089	-0.028645	0.00372866	-0.055846	-0.0577707	-0.0752491	-0.0777485	-0.144364	-0.11501	-0.104899	-0.145096	-0.132146	-0.105134	-0.116339	-0.123222	-0.142517	-0.160164	-0.152264	-0.101977	-0.0969033	-0.112957	-0.150977	-0.153197	-0.170686	-0.180292	-0.183442	-0.121611	-0.125534	-0.0890172	-0.0891046	-0.0578095	-0.03891	-0.0266319	-0.0553633	-0.0847828	-0.0814486
372	-0.0830406	-0.131956	-0.165881	-0.186946	-0.170255	-0.161075	-0.1695	-0.170317	-0.224122	-0.182343	-0.14552	-0.102343	-0.0658578	-0.0366899	-0.0119874	0.0334301	-0.0888685	-0.0851591	-0.0912895	-0.0987195	-0.163129	-0.137639	-0.127755	-0.160932	-0.154116	-0.127231	-0.124691	-0.133338	-0.158523	-0.175928	-0.160957	-0.112705	-0.11983	-0.132477	-0.16314	-0.161483	-0.18207	-0.19897	-0.201716	-0.143088	-0.139375	-0.0997068	-0.100862	-0.0646767	-0.0475181	-0.0392126	-0.0636166	-0.094761	-0.0961441
373	-0.0561039	-0.0970615	-0.119732	-0.129523	-0.10862	-0.096528	-0.10914	-0.111786	-0.163164	-0.132424	-0.107979	-0.0701054	-0.0462932	-0.0362855	-0.0137862	0.00771989	-0.0933666	-0.0698543	-0.0598227	-0.0703354	-0.123232	-0.0974865	-0.0902433	-0.126861	-0.122019	-0.0946366	-0.0954519	-0.105658	-0.12852	-0.134646	-0.108551	-0.0749453	-0.0781255	-0.0780169	-0.103276	-0.105215	-0.116579	-0.133067	-0.133052	-0.0995734	-0.0974068	-0.0675979	-0.062262	-0.0252941	-0.0184041	-0.015822	-0.0347022	-0.0586629	-0.0641386
374	-0.0299869	-0.0696274	-0.089992	-0.0986248	-0.0849587	-0.0713261	-0.0919744	-0.092733	-0.147704	-0.118779	-0.10286	-0.070141	-0.0748603	-0.0756443	-0.0661901	-0.025275	-0.0233396	-0.0589651	-0.065515	-0.0820159	-0.125354	-0.091055	-0.0788395	-0.108696	-0.100513	-0.0696727	-0.0747358	-0.0835875	-0.100525	-0.106613	-0.0802455	-0.037813	-0.0439888	-0.0439694	-0.0763492	-0.0817054	-0.0932257	-0.10563	-0.102658	-0.0850817	-0.0933645	-0.0767009	-0.072398	-0.0444574	-0.0445472	-0.0392155	-0.0575981	-0.0839637	-0.0793338
375	-0.0273209	-0.0610429	-0.0868198	-0.107851	-0.0955823	-0.0747265	-0.0989796	-0.108102	-0.170839	-0.138695	-0.123655	-0.0828227	-0.0825745	-0.0489006	-0.0317839	0.0181411	-0.00730819	-0.0458362	-0.0682862	-0.0783916	-0.12828	-0.0936026	-0.0743589	-0.0977316	-0.0877353	-0.0572286	-0.0582172	-0.0623378	-0.0808231	-0.0879645	-0.0611808	-0.00865402	-0.0263986	-0.0304619	-0.0676494	-0.071358	-0.0888501	-0.107982	-0.117381	-0.0819916	-0.101794	-0.0896405	-0.0993506	-0.0757828	-0.0770154	-0.0748469	-0.102264	-0.123858	-0.115939
376	-0.0238835	-0.0445033	-0.0720508	-0.0987529	-0.0927969	-0.0705101	-0.106123	-0.131338	-0.201337	-0.162207	-0.154038	-0.105104	-0.105745	-0.0686285	-0.0434555	0.00810599	-0.036526	-0.0630042	-0.0596889	-0.0548246	-0.110711	-0.0802051	-0.0501616	-0.0709754	-0.0714199	-0.0384122	-0.0317337	-0.0361925	-0.0498791	-0.0606693	-0.0325749	0.0232016	-0.00578711	-0.0101093	-0.0498082	-0.0456097	-0.0808332	-0.111424	-0.151107	-0.104912	-0.131477	-0.118129	-0.140055	-0.122601	-0.12609	-0.12431	-0.158959	-0.179473	-0.167695
377	-0.0963354	-0.15244	-0.201175	-0.210135	-0.191181	-0.179956	-0.19581	-0.197736	-0.227412	-0.189728	-0.152971	-0.111234	-0.0859342	-0.0703376	-0.0473322	-0.050708	-0.139953	-0.0984678	-0.104233	-0.114497	-0.185426	-0.126997	-0.10605	-0.171724	-0.154026	-0.0997964	-0.11875	-0.128238	-0.172199	-0.190389	-0.162255	-0.110019	-0.151995	-0.16026	-0.191502	-0.163633	-0.178419	-0.206649	-0.212389	-0.153499	-0.138441	-0.101739	-0.0897166	-0.0421926	-0.0211807	-0.0146158	-0.0193457	-0.0443388	-0.0634024
378	-0.0933029	-0.157223	-0.209111	-0.207167	-0.195422	-0.196334	-0.206789	-0.201751	-0.215804	-0.18924	-0.147969	-0.113511	-0.0954332	-0.0913819	-0.073019	-0.0925423	-0.145645	-0.0998165	-0.110015	-0.130742	-0.194407	-0.132781	-0.107752	-0.185943	-0.166441	-0.101155	-0.124671	-0.144165	-0.194568	-0.215453	-0.191961	-0.150921	-0.184905	-0.19116	-0.222133	-0.190918	-0.195263	-0.219369	-0.207483	-0.16067	-0.136316	-0.101163	-0.0890899	-0.035559	-0.00862005	0.00589649	0.0164667	-0.0138645	-0.038685
379	-0.0726422	-0.141339	-0.193911	-0.189228	-0.184169	-0.19452	-0.200299	-0.190624	-0.199796	-0.184832	-0.155475	-0.135075	-0.10303	-0.0683108	-0.0494003	-0.09428	-0.166586	-0.081519	-0.132117	-0.154635	-0.21839	-0.122082	-0.114511	-0.190872	-0.142509	-0.0927235	-0.138126	-0.142581	-0.193746	-0.211642	-0.189455	-0.133021	-0.177572	-0.187235	-0.220053	-0.189661	-0.183989	-0.207638	-0.191634	-0.153319	-0.129788	-0.102823	-0.0746318	-0.0173361	0.00822877	0.0192319	0.0330965	0.0084962	-0.0173015
380	-0.0404625	-0.0863818	-0.119345	-0.123619	-0.117192	-0.117691	-0.131362	-0.120714	-0.125816	-0.109511	-0.0829169	-0.0672374	-0.0784422	-0.0429363	-0.0320469	-0.109019	-0.0522485	0.0190948	-0.0605974	-0.0765867	-0.125412	-0.0548073	-0.0308566	-0.100031	-0.0711377	-0.0231803	-0.0628499	-0.078215	-0.106771	-0.113691	-0.0993267	-0.0455722	-0.0602199	-0.0697978	-0.1177	-0.103486	-0.0989147	-0.106866	-0.0806123	-0.067604	-0.0634499	-0.0526659	-0.0274143	0.016944	0.0115988	0.00645965	0.00283087	-0.00461395	-0.0149291
381	-0.042557	-0.104198	-0.14969	-0.144629	-0.1372	-0.142504	-0.149588	-0.128067	-0.119386	-0.107257	-0.0717119	-0.0563412	-0.0568776	-0.00623873	-0.0246963	-0.0496781	-0.0565627	0.00111703	-0.106556	-0.133125	-0.160375	-0.0906697	-0.0857001	-0.144316	-0.1007	-0.0629106	-0.10497	-0.11568	-0.153597	-0.159232	-0.154403	-0.0968735	-0.112544	-0.115199	-0.165946	-0.153782	-0.140053	-0.145637	-0.0955066	-0.0687591	-0.0552465	-0.033547	-0.0152898	0.0210203	0.0261666	0.0184247	0.0241829	0.020402	0.000157727
382	-0.0554297	-0.111826	-0.160187	-0.152252	-0.156659	-0.177273	-0.189699	-0.173153	-0.178227	-0.153544	-0.127264	-0.107975	-0.0980493	-0.0513397	-0.0553635	-0.0648035	-0.115823	-0.052213	-0.152801	-0.161106	-0.174951	-0.125316	-0.140055	-0.187575	-0.136635	-0.105206	-0.158823	-0.164504	-0.200345	-0.204605	-0.208026	-0.149374	-0.143794	-0.145706	-0.205316	-0.211772	-0.202942	-0.212326	-0.180494	-0.138358	-0.124622	-0.0970691	-0.0808707	-0.0444988	-0.0166233	-0.000732166	0.00750778	-0.0167201	-0.0281718
383	-0.0587884	-0.101666	-0.143243	-0.130819	-0.14512	-0.189905	-0.191611	-0.167673	-0.170329	-0.142153	-0.121042	-0.0961137	-0.0748275	-0.0707867	-0.0732584	-0.0340021	-0.121981	-0.107175	-0.174008	-0.166626	-0.150573	-0.156681	-0.195848	-0.209657	-0.184593	-0.172811	-0.205345	-0.215485	-0.23553	-0.235664	-0.248203	-0.202844	-0.181067	-0.176591	-0.225777	-0.249615	-0.237922	-0.241577	-0.217373	-0.173396	-0.149809	-0.110277	-0.0979383	-0.074498	-0.038071	-0.00889593	-0.0065398	-0.0428395	-0.0410916
384	-0.0924607	-0.12097	-0.148171	-0.134288	-0.139057	-0.181008	-0.20004	-0.202137	-0.214145	-0.172082	-0.147057	-0.127939	-0.0943859	-0.0800553	-0.0690693	-0.068996	-0.205296	-0.137788	-0.169165	-0.140772	-0.149763	-0.168458	-0.200603	-0.212963	-0.182941	-0.176576	-0.199169	-0.19805	-0.223643	-0.224068	-0.235474	-0.193468	-0.170393	-0.178895	-0.21603	-0.239453	-0.234952	-0.254479	-0.2696	-0.195759	-0.171625	-0.138305	-0.131923	-0.108833	-0.0612711	-0.0213997	-0.0175207	-0.0591265	-0.0532452
385	-0.0772895	-0.131044	-0.162313	-0.132217	-0.159136	-0.217786	-0.232654	-0.202887	-0.210469	-0.198494	-0.181281	-0.172996	-0.155175	-0.173107	-0.161034	-0.149639	-0.250305	-0.210824	-0.244925	-0.228371	-0.215449	-0.241838	-0.285625	-0.290502	-0.285599	-0.275639	-0.302796	-0.306634	-0.312984	-0.299429	-0.305083	-0.264392	-0.223202	-0.224293	-0.26588	-0.303778	-0.297862	-0.298251	-0.277153	-0.257203	-0.228002	-0.197184	-0.171116	-0.143025	-0.0872493	-0.0433913	-0.0173683	-0.0577884	-0.0570632
386	-0.0813523	-0.131623	-0.157761	-0.121516	-0.155383	-0.225422	-0.228515	-0.183165	-0.17981	-0.156892	-0.12438	-0.119581	-0.100822	-0.141021	-0.136539	-0.120164	-0.223418	-0.189369	-0.242703	-0.239021	-0.22967	-0.265663	-0.31537	-0.323537	-0.315699	-0.312495	-0.33566	-0.335631	-0.352973	-0.331521	-0.341482	-0.322885	-0.267316	-0.256059	-0.290302	-0.329905	-0.310133	-0.303435	-0.277933	-0.241034	-0.197573	-0.153422	-0.112766	-0.0903112	-0.0163704	0.0433396	0.0679192	0.0173934	0.0273487
387	-0.0753278	-0.131182	-0.153269	-0.121848	-0.160578	-0.23567	-0.254123	-0.209821	-0.219379	-0.185662	-0.154746	-0.141067	-0.124355	-0.149449	-0.115877	-0.124379	-0.241097	-0.18093	-0.237562	-0.219408	-0.222179	-0.254571	-0.288958	-0.29782	-0.283636	-0.281316	-0.305565	-0.305852	-0.323877	-0.315063	-0.336094	-0.299986	-0.238786	-0.244447	-0.299686	-0.345703	-0.32466	-0.31936	-0.307484	-0.260698	-0.22993	-0.190558	-0.15532	-0.128347	-0.0546972	0.0134526	0.0324798	-0.0234538	-0.0110861
388	-0.0434438	-0.0748402	-0.0727125	-0.0460051	-0.0938953	-0.162396	-0.195847	-0.157022	-0.1875	-0.171264	-0.170515	-0.158975	-0.168051	-0.165933	-0.118181	-0.148826	-0.229999	-0.155717	-0.21294	-0.187955	-0.181337	-0.213307	-0.241043	-0.235713	-0.232791	-0.242276	-0.264442	-0.259657	-0.251888	-0.231999	-0.252877	-0.203321	-0.122212	-0.136172	-0.201489	-0.270162	-0.257957	-0.249269	-0.241558	-0.225684	-0.224328	-0.215821	-0.20363	-0.188839	-0.141116	-0.0838911	-0.0740794	-0.118168	-0.0995975
389	-0.0129694	-0.0314059	-0.0139538	0.0220415	-0.0322987	-0.100055	-0.132119	-0.0933763	-0.121506	-0.104213	-0.112022	-0.115411	-0.137486	-0.157625	-0.136642	-0.155481	-0.198759	-0.145392	-0.176072	-0.153437	-0.145903	-0.190322	-0.226946	-0.219451	-0.22673	-0.246542	-0.271081	-0.261088	-0.245062	-0.204923	-0.216706	-0.196197	-0.109424	-0.0981581	-0.140872	-0.209111	-0.198327	-0.184338	-0.192008	-0.175666	-0.176197	-0.173606	-0.152494	-0.14382	-0.101463	-0.0453729	-0.0318025	-0.0714467	-0.0473398
390	-0.00961571	-0.0280487	-0.00940065	0.0325	-0.0217833	-0.0977641	-0.113803	-0.0677809	-0.0881436	-0.0557379	-0.0596755	-0.0629405	-0.0710646	-0.110327	-0.0945165	-0.110358	-0.17635	-0.11981	-0.155828	-0.122084	-0.117525	-0.174843	-0.217475	-0.209035	-0.210614	-0.238017	-0.260706	-0.246628	-0.242689	-0.203025	-0.226383	-0.226568	-0.144048	-0.12791	-0.151407	-0.212792	-0.191202	-0.174966	-0.193244	-0.150792	-0.142844	-0.128277	-0.0990784	-0.0944562	-0.0292508	0.0443861	0.0560389	0.00896711	0.0442708
391	0.0168122	0.00517591	0.0239396	0.0425477	-0.0250846	-0.0970372	-0.133971	-0.102115	-0.147362	-0.111281	-0.128697	-0.124315	-0.133319	-0.134497	-0.0834685	-0.11654	-0.182077	-0.115116	-0.159052	-0.0933948	-0.0931465	-0.16551	-0.184363	-0.148007	-0.171362	-0.201606	-0.20067	-0.188381	-0.167332	-0.149864	-0.17798	-0.156316	-0.0812045	-0.0883732	-0.124682	-0.192652	-0.201174	-0.192473	-0.227808	-0.186754	-0.201703	-0.201819	-0.190836	-0.185397	-0.130544	-0.0563771	-0.0544762	-0.102951	-0.0668544
392	0.0730689	0.0852641	0.121204	0.134757	0.058767	-0.0106371	-0.0631055	-0.0493318	-0.127596	-0.100564	-0.142994	-0.147659	-0.171026	-0.155252	-0.0969361	-0.146057	-0.18633	-0.117577	-0.151399	-0.0665765	-0.0700337	-0.145477	-0.147082	-0.0899105	-0.118125	-0.162091	-0.146799	-0.119342	-0.0881642	-0.062861	-0.0782013	-0.0561815	0.0186843	0.0101274	-0.0259805	-0.104366	-0.125283	-0.125398	-0.193262	-0.165025	-0.201353	-0.222854	-0.226791	-0.224735	-0.183085	-0.111909	-0.109453	-0.153182	-0.118937
393	0.0796801	0.0893312	0.117834	0.118256	0.0359214	-0.0311724	-0.0968547	-0.0883367	-0.190894	-0.168447	-0.221161	-0.213995	-0.232644	-0.190589	-0.114948	-0.164964	-0.200041	-0.130325	-0.164007	-0.0744726	-0.0779864	-0.150611	-0.134149	-0.0678747	-0.113463	-0.156275	-0.130765	-0.105721	-0.0591903	-0.0498344	-0.0646061	-0.0240185	0.0422919	0.0225922	-0.0320791	-0.115555	-0.146924	-0.151776	-0.2241	-0.214264	-0.263238	-0.289386	-0.299865	-0.293249	-0.260057	-0.188911	-0.186314	-0.233101	-0.203597
394	0.118184	0.15191	0.19536	0.196067	0.104691	0.0409964	-0.0363755	-0.0389785	-0.169085	-0.159614	-0.238645	-0.228511	-0.247474	-0.194411	-0.107628	-0.168595	-0.205343	-0.119299	-0.149166	-0.0526156	-0.0501753	-0.123382	-0.098578	-0.0221687	-0.0701605	-0.116747	-0.0818899	-0.0521934	0.00350018	0.0196138	0.0135756	0.0565756	0.125891	0.107977	0.0526908	-0.039786	-0.0808963	-0.0905696	-0.187159	-0.193856	-0.260622	-0.295147	-0.312103	-0.314249	-0.285876	-0.221836	-0.221909	-0.263728	-0.233669
395	0.133243	0.188945	0.246066	0.248665	0.163771	0.111689	0.0351034	0.0186983	-0.107233	-0.0924648	-0.183644	-0.175174	-0.199903	-0.155248	-0.0595742	-0.123201	-0.170454	-0.0756114	-0.0827109	0.0195813	0.0252568	-0.0489209	-0.0248916	0.0543611	0.0130912	-0.0428396	-0.00884906	0.0288696	0.0788948	0.0981987	0.0891876	0.109971	0.170655	0.161345	0.125508	0.0440861	-0.00343602	-0.0150194	-0.127066	-0.120285	-0.192922	-0.240542	-0.262846	-0.271044	-0.260815	-0.212371	-0.216005	-0.242078	-0.216228
396	0.104209	0.139788	0.183386	0.165167	0.0865609	0.039618	-0.0307523	-0.0523567	-0.167783	-0.13854	-0.211321	-0.193808	-0.20745	-0.157086	-0.0631783	-0.10335	-0.161878	-0.0856983	-0.0772775	0.0260554	0.0127337	-0.0625027	-0.0258278	0.0508696	-0.00395011	-0.0447487	0.00554029	0.0334012	0.0815229	0.0720878	0.0558872	0.0865776	0.125631	0.100705	0.0643371	-0.0014372	-0.0619863	-0.0752217	-0.180011	-0.1593	-0.229482	-0.263992	-0.285748	-0.283948	-0.277826	-0.228064	-0.232154	-0.267747	-0.245115
397	0.148892	0.188655	0.236689	0.213412	0.117566	0.0603398	-0.0232438	-0.0439262	-0.19271	-0.170679	-0.257181	-0.236512	-0.251922	-0.167456	-0.0746318	-0.135112	-0.165842	-0.0871556	-0.108974	0.00332435	-0.010836	-0.096752	-0.0510705	0.0439256	-0.024268	-0.0784015	-0.00453578	0.024818	0.0981444	0.0947418	0.0779401	0.138051	0.196813	0.15991	0.0976286	0.00345711	-0.0641616	-0.074682	-0.186625	-0.185812	-0.270389	-0.309667	-0.339417	-0.340143	-0.333808	-0.282462	-0.288793	-0.327806	-0.302323
398	0.211563	0.298213	0.370787	0.344803	0.255695	0.215642	0.12152	0.0699661	-0.0979946	-0.090791	-0.210833	-0.196248	-0.227732	-0.140034	-0.0249885	-0.100718	-0.126736	-0.0284069	-0.023535	0.0984236	0.0963442	0.0161267	0.0704618	0.176633	0.111988	0.0460982	0.116426	0.15615	0.235357	0.249132	0.244942	0.289739	0.343571	0.322681	0.273259	0.180124	0.103049	0.0828446	-0.0668245	-0.083339	-0.195906	-0.257969	-0.308286	-0.328429	-0.350162	-0.319862	-0.341336	-0.359281	-0.327152
399	0.183981	0.268112	0.329333	0.284446	0.216771	0.203963	0.119554	0.0427486	-0.0955121	-0.0728362	-0.189348	-0.167604	-0.183425	-0.106132	0.0195224	-0.0287932	-0.0950466	-0.00217848	0.038408	0.150839	0.143533	0.0793259	0.14079	0.237727	0.178537	0.127519	0.194016	0.234823	0.298302	0.290099	0.28522	0.315172	0.332102	0.309477	0.276304	0.217559	0.131265	0.0974612	-0.0622039	-0.0500201	-0.156784	-0.21121	-0.264835	-0.27887	-0.312356	-0.298671	-0.322827	-0.332629	-0.307895
400	0.143993	0.197647	0.227993	0.172311	0.106753	0.104505	0.0291035	-0.0342637	-0.154879	-0.117222	-0.211547	-0.176153	-0.184392	-0.103569	0.00366897	-0.0218312	-0.0620927	-0.00939793	0.0330179	0.133758	0.109759	0.0510587	0.117647	0.201811	0.130868	0.0959831	0.176509	0.196038	0.262528	0.231365	0.212721	0.266165	0.266963	0.225154	0.182859	0.135319	0.0452091	0.0210689	-0.103594	-0.0906137	-0.184415	-0.224793	-0.278087	-0.281898	-0.307518	-0.294386	-0.319516	-0.336754	-0.319165
401	0.145581	0.191745	0.217278	0.17189	0.111887	0.105182	0.0335093	-0.0222864	-0.152205	-0.137977	-0.237772	-0.210153	-0.212234	-0.131399	-0.0296121	-0.0469027	-0.099523	-0.0573903	-0.011292	0.0746475	0.0542231	0.0128959	0.0747699	0.161422	0.101002	0.0704379	0.147415	0.168041	0.227994	0.201695	0.196164	0.258451	0.256704	0.215117	0.172643	0.123332	0.0403607	0.0126678	-0.0973403	-0.111094	-0.197723	-0.237876	-0.290266	-0.295763	-0.322144	-0.308022	-0.326058	-0.344349	-0.329777
402	0.142171	0.207396	0.247346	0.204583	0.161431	0.167394	0.0952101	0.0176739	-0.100249	-0.0899662	-0.191784	-0.16705	-0.168	-0.0908013	0.0117615	-0.00645875	-0.104141	-0.0464934	0.00372099	0.0867234	0.0769145	0.0476062	0.108379	0.194424	0.154776	0.126183	0.197116	0.223832	0.272121	0.251606	0.259641	0.313411	0.30064	0.268404	0.230243	0.181636	0.106262	0.0652905	-0.0661015	-0.0651827	-0.148585	-0.188737	-0.240164	-0.251909	-0.280888	-0.271209	-0.294472	-0.308907	-0.289375
403	0.083005	0.109081	0.119362	0.069984	0.0337397	0.0422097	-0.0186426	-0.10547	-0.189747	-0.158498	-0.227275	-0.195243	-0.155452	-0.0759676	0.0332814	0.0500069	-0.164972	-0.0893927	-0.0649534	0.00801583	-0.00979953	-0.0357033	0.0122857	0.086358	0.0700758	0.0491937	0.113599	0.141566	0.160411	0.12649	0.119265	0.188394	0.157792	0.122423	0.0741076	0.0376758	-0.026433	-0.0780978	-0.199534	-0.150862	-0.20551	-0.214664	-0.25269	-0.240604	-0.245694	-0.226489	-0.242617	-0.264588	-0.258319
404	-0.0471481	-0.0842713	-0.127459	-0.152611	-0.164531	-0.162282	-0.179068	-0.224371	-0.213889	-0.199944	-0.191985	-0.172576	-0.113947	-0.0825228	-0.0494102	0.0667463	-0.141883	-0.178646	-0.156749	-0.160047	-0.167811	-0.150805	-0.141734	-0.113186	-0.0868504	-0.0807654	-0.0686953	-0.0493752	-0.0773074	-0.123183	-0.132317	-0.0881304	-0.141081	-0.167399	-0.191031	-0.172258	-0.195973	-0.236404	-0.251842	-0.209011	-0.184913	-0.160138	-0.162415	-0.127122	-0.0978237	-0.0770313	-0.0599346	-0.0866085	-0.115458
405	-0.0605102	-0.089973	-0.133739	-0.160231	-0.130666	-0.0919836	-0.0854608	-0.115399	-0.0854018	-0.0918953	-0.0663219	-0.0601059	-0.0341213	-0.0198742	-0.0351413	0.0888676	0.044096	-0.0818731	-0.0196147	-0.0459799	-0.0711981	-0.0517328	-0.0254471	-0.00804964	-0.000679769	0.00603197	0.0293166	0.0450328	0.0272899	-0.0239514	-0.0188768	-0.00257791	-0.0712597	-0.0945705	-0.0870705	-0.0302646	-0.047781	-0.0771952	-0.0570052	-0.0508411	-0.0217253	-0.0059032	-0.0246903	-0.00688129	-0.0277473	-0.0682843	-0.0433777	-0.025397	-0.084581
406	-0.0938997	-0.127245	-0.169586	-0.18607	-0.139851	-0.0939699	-0.0706724	-0.0993724	-0.0405146	-0.0531449	0.00216128	0.00681817	0.0309765	0.0169315	-0.0422264	0.0928013	0.109695	-0.0749179	0.00425841	-0.0435655	-0.0692192	-0.0498945	-0.0313908	-0.0301554	-0.0233514	-0.00841305	0.00776767	0.0208667	-0.00858857	-0.0561755	-0.0359976	-0.0575069	-0.139485	-0.140769	-0.0955757	-0.0107614	-0.018496	-0.0467637	-0.01566	-0.00728746	0.0446312	0.070386	0.054642	0.0754219	0.0459942	-0.0120877	0.0161992	0.0512593	-0.021672
407	-0.0880038	-0.107194	-0.146073	-0.162644	-0.113359	-0.0692472	-0.0366997	-0.0584159	0.0109551	0.0101199	0.0674807	0.0723343	0.0800794	0.060447	-0.0108385	0.102388	0.183256	-0.00972106	0.0553051	0.0113802	-0.0103113	0.000590264	0.023824	0.0259177	0.0267808	0.0337008	0.0569193	0.0692944	0.0452529	0.000164283	0.00711401	-0.0264504	-0.11147	-0.113086	-0.0566219	0.0338901	0.0275796	0.00760061	0.0390027	0.0591571	0.109712	0.126316	0.105173	0.118125	0.0683593	-0.00410435	0.0132306	0.0631655	-0.00474828
408	-0.0648291	-0.0687021	-0.0903388	-0.123974	-0.0918867	-0.0336781	-0.00593528	-0.0227842	0.0315325	0.000216051	0.0159148	0.0214048	0.0257467	0.0207843	-0.00363144	0.069828	0.150432	-0.00960836	0.0891865	0.0569253	0.0642579	0.100333	0.12582	0.136065	0.14345	0.154612	0.14003	0.137403	0.13255	0.0857324	0.0996026	0.0745739	0.00348791	-0.0101372	0.0269433	0.10772	0.0869359	0.0675515	0.107601	0.0741965	0.0842484	0.076829	0.0388826	0.032824	-0.0281809	-0.0911588	-0.0950318	-0.0495874	-0.0848625
409	-0.0830136	-0.0689789	-0.076565	-0.104167	-0.044447	0.0180315	0.0752749	0.09721	0.172588	0.152681	0.200271	0.186174	0.172495	0.171102	0.0868484	0.148645	0.359601	0.162663	0.185557	0.129442	0.130609	0.155289	0.174495	0.178006	0.175477	0.175505	0.174314	0.172721	0.183237	0.141382	0.129054	0.107718	0.0708862	0.0314546	0.0754817	0.14163	0.157173	0.176042	0.260089	0.233748	0.252409	0.243699	0.210904	0.176292	0.115023	0.0315778	0.0214451	0.0858838	0.0504146
410	-0.166056	-0.190669	-0.204912	-0.207647	-0.150837	-0.12159	-0.0432937	0.0182048	0.122924	0.0906402	0.187805	0.155939	0.153575	0.136726	0.0132174	0.0979613	0.298482	0.0740732	0.0285656	-0.052653	-0.0450924	-0.0212236	-0.0324273	-0.0304267	-0.0183858	-0.0146479	-0.0194125	-0.0124329	-0.0164245	-0.0548643	-0.0766314	-0.0852408	-0.09944	-0.149258	-0.111988	-0.0579953	-0.0131765	0.0212004	0.16504	0.128932	0.193626	0.210695	0.210165	0.190715	0.168998	0.112782	0.128188	0.171143	0.130446
411	-0.0776997	-0.0766297	-0.0868267	-0.117047	-0.0510061	0.00809471	0.0707555	0.0936021	0.171079	0.151071	0.200323	0.182612	0.158798	0.142253	0.0487778	0.119319	0.366928	0.144541	0.207697	0.158504	0.158666	0.182501	0.196188	0.203683	0.191817	0.187335	0.181365	0.181104	0.196489	0.152459	0.136331	0.111102	0.0517223	0.0167784	0.0779548	0.155737	0.161495	0.182672	0.26714	0.232081	0.244399	0.241751	0.212079	0.183889	0.110387	0.017052	0.00900657	0.0796889	0.0386105
412	-0.100701	-0.135201	-0.173992	-0.197785	-0.158314	-0.112879	-0.0962164	-0.10783	-0.0591856	-0.0840911	-0.0583475	-0.0614635	-0.044128	-0.0977195	-0.115901	0.00966635	0.0271373	-0.137666	0.0195502	-0.00558512	-0.0141566	0.0404876	0.0554327	0.047832	0.0706777	0.0984513	0.0548765	0.0553214	0.0272776	-0.0281071	-0.00930852	-0.0194611	-0.113173	-0.123445	-0.07993	0.0100535	-0.0218651	-0.0414279	0.00334375	-0.0292657	-0.0228451	-0.000817823	-0.01427	0.00971879	-0.0284943	-0.0715197	-0.0548293	-0.0303899	-0.0742231
413	-0.135302	-0.18459	-0.229832	-0.244157	-0.196327	-0.157329	-0.123573	-0.124628	-0.047215	-0.0716163	-0.0193072	-0.0298353	0.00267239	-0.0614335	-0.100802	0.0400218	0.0522941	-0.134459	0.00289938	-0.0400075	-0.0428227	-0.000544117	-0.00100323	-0.004096	0.0177773	0.0410859	0.00217879	0.00365472	-0.0295219	-0.0863499	-0.0747169	-0.0917761	-0.188976	-0.197353	-0.141577	-0.045836	-0.0599221	-0.0749874	-0.010036	-0.0287183	0.00766323	0.0384522	0.0340736	0.0569161	0.0255598	-0.0187916	0.00321352	0.0288508	-0.0231529
414	-0.175221	-0.222933	-0.260436	-0.241779	-0.169502	-0.15183	-0.0590779	0.00394448	0.13818	0.118261	0.240867	0.200901	0.209174	0.159653	-0.00565156	0.116119	0.331722	0.078537	0.0400922	-0.060045	-0.0591906	-0.0579967	-0.0833408	-0.0946386	-0.0921382	-0.0882505	-0.0876741	-0.086326	-0.103621	-0.132471	-0.155899	-0.18762	-0.223558	-0.251429	-0.1793	-0.10526	-0.0467041	-0.00509822	0.139151	0.129517	0.235106	0.270556	0.283483	0.274823	0.260934	0.197408	0.227192	0.269382	0.20622
415	-0.169829	-0.229462	-0.275559	-0.268934	-0.19983	-0.174534	-0.0938554	-0.0587675	0.0735447	0.0583322	0.142485	0.116274	0.153822	0.0932064	-0.00814981	0.125733	0.200963	-0.011411	0.0367005	-0.0451874	-0.0169372	0.00464068	-0.0309977	-0.0252691	-0.00973714	-0.0150253	-0.0484719	-0.0450455	-0.0684374	-0.110713	-0.140206	-0.160109	-0.226885	-0.254843	-0.185868	-0.0997729	-0.0680862	-0.0527452	0.0643423	0.0764862	0.163287	0.189175	0.195612	0.190628	0.165467	0.101522	0.126485	0.166828	0.103458
416	-0.10327	-0.133958	-0.173966	-0.167853	-0.107747	-0.0678824	-0.0140822	-0.0141124	0.0831744	0.05529	0.0890341	0.0686693	0.102406	0.0547951	0.00123093	0.0839497	0.134894	-0.00459623	0.071377	0.0231164	0.0581351	0.0749989	0.0549219	0.0649811	0.0664451	0.0578525	0.031936	0.0360779	0.0271772	0.00159229	-0.0129258	-0.0429562	-0.114945	-0.121793	-0.0622302	0.0193213	0.030922	0.0337673	0.11317	0.0921252	0.137622	0.145384	0.14308	0.140952	0.0991417	0.0264022	0.0468967	0.0943361	0.0313297
417	-0.182484	-0.264956	-0.312711	-0.278745	-0.232701	-0.241471	-0.176408	-0.168397	-0.0417114	-0.051158	0.0429069	0.0212538	0.102171	0.0546085	-0.0224243	0.0985336	-0.00204242	-0.114898	-0.140571	-0.20793	-0.185733	-0.200775	-0.2539	-0.250306	-0.224433	-0.223892	-0.226927	-0.215426	-0.266283	-0.288228	-0.302063	-0.33083	-0.377809	-0.375395	-0.325461	-0.257064	-0.214838	-0.222977	-0.123595	-0.0885628	0.0353118	0.0793835	0.119668	0.139605	0.179299	0.167498	0.215154	0.213437	0.156239
418	-0.235665	-0.338789	-0.395045	-0.353901	-0.296792	-0.307101	-0.225641	-0.169741	-0.0259255	-0.0535141	0.0798385	0.0467843	0.118312	0.0518157	-0.0822394	0.0971089	0.0636491	-0.130941	-0.179741	-0.293087	-0.280288	-0.262425	-0.320778	-0.343679	-0.303369	-0.277774	-0.295622	-0.294822	-0.354825	-0.385163	-0.39269	-0.408782	-0.446233	-0.460425	-0.409451	-0.33708	-0.27192	-0.256532	-0.0960788	-0.0933043	0.0500331	0.111617	0.164231	0.19578	0.246524	0.234983	0.292745	0.287498	0.221647
419	-0.177063	-0.222674	-0.249171	-0.223071	-0.147555	-0.128079	-0.0246996	0.04981	0.189162	0.150452	0.262152	0.221164	0.24556	0.193975	0.0334381	0.142805	0.312525	0.0952574	0.0418189	-0.0622625	-0.0400848	-0.0447125	-0.0897979	-0.101504	-0.0922724	-0.0866582	-0.0827426	-0.0887401	-0.105805	-0.124177	-0.144705	-0.181131	-0.210726	-0.236439	-0.165832	-0.0929075	-0.0215137	0.0222632	0.186212	0.15593	0.26714	0.295714	0.312209	0.300308	0.291752	0.22596	0.254143	0.299654	0.241777
420	-0.147123	-0.187233	-0.219829	-0.208561	-0.14054	-0.109091	-0.019133	0.0268483	0.149714	0.0957435	0.175147	0.148829	0.173957	0.113824	0.00197165	0.0971254	0.219323	0.0418604	0.0629429	-0.0135366	0.0207197	0.0241345	-0.0149259	-0.0192023	-0.0172295	-0.00559594	-0.017837	-0.0350421	-0.0454231	-0.0686344	-0.0749785	-0.115615	-0.168471	-0.182828	-0.114709	-0.0290654	0.0174411	0.0407918	0.172458	0.123343	0.209236	0.222705	0.22711	0.225019	0.193582	0.12044	0.141046	0.190296	0.133978
421	-0.100121	-0.136504	-0.166801	-0.16255	-0.106226	-0.0763157	0.00120735	0.0403722	0.143396	0.0854546	0.147811	0.124461	0.138825	0.0926951	0.00556889	0.0566905	0.153744	0.0336624	0.0553352	-0.002521	0.0314726	0.0384135	0.0122246	0.0102452	0.00794622	0.0210138	0.0102532	-0.0085665	-0.0153417	-0.0311804	-0.033341	-0.0704767	-0.117397	-0.123075	-0.0676494	0.00913666	0.0426948	0.0600971	0.173036	0.115467	0.181785	0.185384	0.190678	0.191534	0.151182	0.0777709	0.0886918	0.136789	0.0910504
422	-0.0564397	-0.0784677	-0.0970281	-0.0992894	-0.0490145	-0.0116916	0.0572373	0.0974667	0.184049	0.125258	0.169952	0.152091	0.145845	0.109745	0.0311393	0.044361	0.179662	0.0901042	0.109397	0.0602806	0.0892992	0.0964412	0.0822893	0.0818419	0.0726338	0.0787608	0.0741278	0.0537935	0.0630777	0.0526859	0.0454418	0.0128144	-0.0198965	-0.0322628	0.0150682	0.0767312	0.106347	0.13055	0.229414	0.164911	0.204683	0.19564	0.19753	0.187595	0.135597	0.0575961	0.0560617	0.110996	0.0769707
423	-0.0917832	-0.0943713	-0.125115	-0.13816	-0.0925716	-0.0528696	0.0034013	0.0393349	0.103598	0.0680534	0.104174	0.0793249	0.0789809	0.0483302	-0.0229481	0.00253189	0.201392	0.0855449	0.124832	0.0880179	0.0835883	0.0978159	0.0965173	0.0796575	0.0681647	0.0838967	0.0779168	0.0477508	0.0559319	0.0331022	0.0256586	0.00606204	-0.0327203	-0.0537064	-0.0185113	0.0482491	0.0681338	0.0868551	0.167077	0.115685	0.143268	0.143566	0.139068	0.12344	0.0861265	0.0220116	0.0146476	0.0551717	0.0309399
424	-0.0987927	-0.11121	-0.141317	-0.146698	-0.0880639	-0.0455431	0.0218874	0.0643732	0.158382	0.110716	0.159175	0.13682	0.139447	0.0842479	-0.00134026	0.0433491	0.225806	0.0931405	0.144059	0.0868535	0.113003	0.127271	0.107497	0.0895789	0.0770216	0.0938324	0.0794371	0.0455279	0.0535281	0.0305581	0.0243247	-0.0119182	-0.0563371	-0.0748645	-0.0231215	0.0524301	0.0828591	0.108465	0.223071	0.156519	0.202183	0.201565	0.1983	0.18529	0.135849	0.0615264	0.0612136	0.113564	0.0769175
425	-0.0989156	-0.111513	-0.142462	-0.146859	-0.0872773	-0.0468268	0.0249861	0.0660427	0.164368	0.118148	0.168868	0.153234	0.15249	0.10068	0.0106763	0.0471433	0.235536	0.101345	0.139425	0.0814658	0.104353	0.121342	0.101519	0.0810863	0.069695	0.0898819	0.0745606	0.0389329	0.0455766	0.0220864	0.0179407	-0.0196105	-0.055863	-0.0737741	-0.0228871	0.0499581	0.0847861	0.114455	0.235797	0.167788	0.215313	0.215845	0.210896	0.198323	0.146524	0.0677916	0.0723259	0.126687	0.0834431
426	-0.136438	-0.172234	-0.210899	-0.204536	-0.139491	-0.104281	-0.0300371	0.00417439	0.114666	0.0706996	0.136283	0.119772	0.140575	0.076059	-0.0217608	0.0606967	0.18716	0.0261149	0.0829569	0.0108191	0.043377	0.0636489	0.0276393	0.00517778	0.00413745	0.0294713	0.00298863	-0.0292448	-0.0392242	-0.067105	-0.0626043	-0.103765	-0.150912	-0.161716	-0.102663	-0.0208961	0.0191582	0.0400293	0.166807	0.108699	0.179406	0.1937	0.196019	0.198013	0.164957	0.0961735	0.113187	0.153897	0.0965859
427	-0.127607	-0.172541	-0.213566	-0.212781	-0.169294	-0.148704	-0.0967647	-0.0862354	-0.00082294	-0.0378709	0.00385067	0.000146577	0.0468909	-0.00258255	-0.0389149	0.0140004	0.0285921	-0.0581698	0.0234991	-0.0157581	0.0124794	0.022046	-0.0130569	-0.03024	-0.0300358	-0.00603511	-0.0378014	-0.070657	-0.0811007	-0.10767	-0.0943508	-0.126974	-0.173235	-0.177081	-0.141951	-0.0737065	-0.0511836	-0.0515873	0.0347637	-0.0100586	0.0536089	0.0718507	0.0739408	0.0882736	0.0723585	0.0257607	0.0381288	0.0584761	0.0102299
428	-0.103438	-0.15084	-0.184003	-0.187901	-0.177256	-0.1827	-0.166666	-0.178383	-0.127619	-0.153846	-0.137414	-0.1275	-0.0669213	-0.0928035	-0.0604097	-0.0402439	-0.151942	-0.146025	-0.0578184	-0.0664094	-0.0418954	-0.0406095	-0.0741967	-0.0836496	-0.0844316	-0.0577045	-0.0880132	-0.117972	-0.134623	-0.157598	-0.137023	-0.155124	-0.188399	-0.180594	-0.1778	-0.139026	-0.139906	-0.160414	-0.126225	-0.14145	-0.0968209	-0.0784829	-0.0692996	-0.0482767	-0.0427027	-0.0513055	-0.0453945	-0.0545062	-0.0786211
429	-0.0647425	-0.107223	-0.136862	-0.143232	-0.157414	-0.172635	-0.17611	-0.199992	-0.181819	-0.189576	-0.19756	-0.175756	-0.118449	-0.124871	-0.0637536	-0.0611932	-0.218776	-0.175533	-0.0926334	-0.0778721	-0.0652123	-0.0672973	-0.0937089	-0.100729	-0.104909	-0.0845738	-0.105094	-0.12542	-0.141617	-0.156104	-0.138721	-0.141417	-0.169126	-0.155923	-0.168676	-0.150254	-0.167759	-0.200511	-0.205299	-0.196357	-0.173637	-0.156354	-0.144003	-0.120315	-0.101147	-0.0873922	-0.086079	-0.112743	-0.117783
430	-0.0477277	-0.0851413	-0.116513	-0.127761	-0.151875	-0.176269	-0.193389	-0.211125	-0.208865	-0.213845	-0.223592	-0.200833	-0.148635	-0.138353	-0.0538639	-0.0696131	-0.259609	-0.17536	-0.12512	-0.0994808	-0.0855901	-0.102695	-0.128631	-0.136042	-0.134966	-0.116368	-0.133437	-0.153803	-0.169611	-0.177813	-0.163055	-0.160746	-0.165042	-0.148891	-0.178963	-0.181692	-0.199828	-0.230477	-0.242839	-0.228508	-0.2146	-0.195977	-0.180685	-0.159736	-0.132235	-0.0998315	-0.095623	-0.134922	-0.131596
431	-0.0629852	-0.100189	-0.127165	-0.138127	-0.151457	-0.172045	-0.177015	-0.175908	-0.170192	-0.174002	-0.16837	-0.144096	-0.0910518	-0.0699323	-0.0044507	-0.0260582	-0.17048	-0.108536	-0.0933776	-0.082556	-0.0797792	-0.0979351	-0.123146	-0.139012	-0.14308	-0.117307	-0.128947	-0.160193	-0.173535	-0.184594	-0.173496	-0.165927	-0.147165	-0.144173	-0.177708	-0.190827	-0.190457	-0.206377	-0.192334	-0.179441	-0.156557	-0.132895	-0.126464	-0.115691	-0.0834267	-0.0603578	-0.0649175	-0.0978366	-0.0923433
432	-0.0712744	-0.0960366	-0.113945	-0.124272	-0.137985	-0.153324	-0.156167	-0.145884	-0.138809	-0.139603	-0.12731	-0.102041	-0.0583238	-0.0356158	0.0159466	-0.0153849	-0.122319	-0.0634044	-0.0726417	-0.0610023	-0.0729976	-0.093931	-0.111728	-0.129398	-0.136636	-0.114778	-0.117241	-0.149853	-0.154172	-0.160703	-0.152588	-0.141148	-0.10904	-0.115787	-0.154548	-0.171339	-0.169099	-0.172428	-0.147708	-0.143032	-0.121385	-0.100025	-0.0962377	-0.0886125	-0.0579686	-0.0384102	-0.0482384	-0.0777646	-0.0711184
433	-0.0425014	-0.0522684	-0.0568803	-0.0680252	-0.0755747	-0.0800025	-0.078411	-0.0572758	-0.0503025	-0.0464272	-0.0289645	-0.00993861	0.00349052	0.0354834	0.0598811	0.00917754	0.0165141	0.0667968	0.019103	0.011077	0.00274632	-0.0138471	-0.0236655	-0.0538491	-0.0648094	-0.0469021	-0.0509949	-0.082941	-0.0748942	-0.0726825	-0.0759572	-0.0740148	-0.0185214	-0.0337687	-0.0689139	-0.0929734	-0.0826417	-0.062484	-0.018997	-0.0247702	-0.0206302	-0.0131659	-0.0153779	-0.022491	-0.00705177	-0.0076837	-0.0298017	-0.0380169	-0.0258462
434	-0.0783746	-0.0920551	-0.10645	-0.115182	-0.101525	-0.0883213	-0.0564768	-0.0270216	0.0170607	-0.00674392	0.0229381	0.0307341	0.0487816	0.0533813	0.0382623	0.0138171	0.0885092	0.0706566	0.0589927	0.0307132	0.0257353	0.0160638	0.00157204	-0.0322329	-0.0472598	-0.0245462	-0.0304137	-0.0707222	-0.0603715	-0.0658559	-0.0659482	-0.0790701	-0.0493784	-0.0655179	-0.0703164	-0.063635	-0.0430173	-0.0188279	0.0598415	0.0185477	0.0438058	0.0490991	0.0494087	0.0474895	0.0463381	0.0182826	0.0129123	0.0258048	0.00862228
435	-0.0893408	-0.110874	-0.132493	-0.138073	-0.110231	-0.0923371	-0.053941	-0.0148431	0.0390071	0.0109767	0.050359	0.0561387	0.072171	0.0664302	0.035391	0.0133207	0.115005	0.08083	0.0684827	0.0316884	0.0249443	0.0228948	0.00519517	-0.0304003	-0.0398237	-0.0155948	-0.0258913	-0.0669619	-0.0594335	-0.0683475	-0.0674231	-0.0836455	-0.0625358	-0.080567	-0.0761898	-0.0589909	-0.0301213	-0.00346506	0.0875809	0.0417095	0.0768063	0.0846586	0.0883464	0.0894555	0.0800039	0.0424828	0.0404778	0.0590149	0.0330911
436	-0.0492705	-0.0538937	-0.0614433	-0.0671766	-0.0494356	-0.0311135	-0.0158988	0.018711	0.0419051	0.0371142	0.0712517	0.0844546	0.0790127	0.0896264	0.0663432	0.0201127	0.14128	0.145055	0.105085	0.0702995	0.0507532	0.0490727	0.0424199	-0.0033366	-0.0124929	0.012027	-0.000522557	-0.0377634	-0.0256905	-0.0208433	-0.0244951	-0.0317797	0.0195728	0.000928312	-0.014477	-0.0231406	0.00514078	0.0394386	0.111503	0.0819555	0.0914748	0.0963624	0.0968161	0.0909186	0.0838826	0.0527295	0.0339384	0.048171	0.0416954
437	-0.0502906	-0.0498478	-0.0548963	-0.0586549	-0.0413498	-0.0157924	0.00825754	0.0424141	0.0732555	0.0591345	0.0937541	0.100625	0.0924989	0.101088	0.0655423	0.0242248	0.168765	0.156039	0.128084	0.0857122	0.0676275	0.0647407	0.0597663	0.0128734	-0.0038414	0.0195946	0.0110529	-0.029307	-0.00809827	-0.00233676	-0.00548702	-0.0177062	0.0292914	0.0103053	0.00372109	0.000705025	0.0302662	0.0691479	0.146867	0.101604	0.112545	0.112635	0.114252	0.107423	0.0972046	0.0582028	0.0430253	0.0641994	0.0532089
438	-0.0741398	-0.0825673	-0.0955137	-0.0949699	-0.0617908	-0.0283604	0.0120553	0.0527317	0.109874	0.0775487	0.119513	0.114665	0.111996	0.0971105	0.0375691	0.0162356	0.19034	0.137251	0.132082	0.0776894	0.068892	0.0717678	0.0598256	0.0185905	0.00324583	0.0255124	0.0146367	-0.0268097	-0.00714049	-0.00806251	-0.0100267	-0.0305367	-0.0102997	-0.0291168	-0.0138337	0.00727183	0.0427383	0.0815543	0.17805	0.116099	0.143833	0.144004	0.148902	0.145927	0.125269	0.072561	0.0712908	0.103338	0.075459
439	-0.0566094	-0.0605116	-0.068526	-0.0668136	-0.0323684	0.00168595	0.0320574	0.0739375	0.117662	0.0974202	0.139574	0.138225	0.119383	0.105502	0.0430911	0.0132802	0.213141	0.165463	0.14632	0.0947789	0.0767981	0.0811611	0.0756696	0.032741	0.0210509	0.043175	0.0311569	-0.00809047	0.0123303	0.0163584	0.0135791	-0.0030583	0.0262102	0.00538987	0.0148668	0.0291836	0.0654049	0.108015	0.196883	0.143897	0.162174	0.161637	0.165008	0.158599	0.135506	0.0827827	0.0757343	0.107751	0.0840926
440	-0.0343986	-0.0328413	-0.0349698	-0.0359727	-0.0132773	0.0189878	0.0376567	0.074063	0.100383	0.0905489	0.129482	0.133408	0.110553	0.109475	0.0579315	0.0179057	0.202672	0.178331	0.15088	0.106884	0.0843109	0.0855133	0.0840728	0.03805	0.0253739	0.0473405	0.0339803	-0.00283003	0.0204921	0.02979	0.0259433	0.0127328	0.0565285	0.0375187	0.0350556	0.0345156	0.06625	0.108643	0.184547	0.141122	0.144678	0.144062	0.148359	0.141917	0.12266	0.0768102	0.0593442	0.0858959	0.0755778
441	-0.0266985	-0.0258789	-0.023432	-0.0237533	-0.0104466	0.0135511	0.020258	0.0504244	0.0586121	0.066423	0.104081	0.115301	0.0955117	0.100948	0.0691624	0.0172287	0.169478	0.173239	0.125621	0.0871266	0.0693376	0.0706629	0.0664546	0.0195163	0.016214	0.0338619	0.0170318	-0.0109521	0.00307224	0.0162473	0.011417	0.00497613	0.0614365	0.0439987	0.0255258	0.0137459	0.0431381	0.0777579	0.138979	0.117905	0.117363	0.120066	0.126207	0.120165	0.109864	0.077842	0.053605	0.0691505	0.0669688
[truncated: 336 more columns]

## Sheet: apo_run3
Residue number	57	58	59	60	61	62	63	64	65	66	67	68	69	70	71	72	73	74	75	76	77	78	79	80	81	82	83	84	85	86	87	88	89	90	91	92	93	94	95	96	97	98	99	100	101	102	103	104	105
57	1	0.697405	0.497662	0.338849	0.221219	0.183864	0.123226	0.0518578	-0.00829702	-0.0650621	-0.112439	-0.124992	-0.113722	-0.111865	-0.13778	-0.119623	-0.116246	-0.125747	-0.148861	-0.100761	-0.0836775	-0.102883	-0.101368	-0.0454374	-0.0390032	-0.060321	-0.0263722	0.0199452	0.059228	0.0997127	0.132241	0.158688	0.177677	0.214984	0.197805	0.132787	0.103461	0.0638849	-0.0022571	-0.05144	-0.0748224	-0.101971	-0.126876	-0.132955	-0.162967	-0.153522	-0.146552	-0.130063	-0.124562
58	0.697405	1	0.788879	0.60264	0.472246	0.395517	0.307188	0.193859	0.109739	0.0290439	-0.0477933	-0.0795456	-0.0767971	-0.087869	-0.124401	-0.106518	-0.0781614	-0.0962419	-0.139091	-0.0887934	-0.0305596	-0.0631506	-0.0743622	0.015127	0.0399859	-0.00579404	0.0199888	0.102151	0.142146	0.22443	0.268062	0.254526	0.308746	0.387289	0.387822	0.291246	0.277704	0.213859	0.0870522	0.023411	-0.00649416	-0.055526	-0.0737683	-0.0999605	-0.144131	-0.142657	-0.130536	-0.0940946	-0.0812676
59	0.497662	0.788879	1	0.830273	0.692175	0.575048	0.469414	0.320907	0.201226	0.109815	0.0102222	-0.0308346	-0.0450412	-0.0679008	-0.129655	-0.120691	-0.0733054	-0.0969242	-0.143935	-0.0823952	-0.0100198	-0.0509994	-0.0696075	0.0458084	0.0771713	0.0116305	0.0397439	0.148678	0.207902	0.33218	0.384113	0.352306	0.427971	0.530261	0.549024	0.423195	0.409991	0.347876	0.179123	0.0940541	0.051707	-0.00763495	-0.0269766	-0.069541	-0.118398	-0.12119	-0.102708	-0.0526512	-0.0302509
60	0.338849	0.60264	0.830273	1	0.859708	0.709429	0.55178	0.363175	0.240544	0.14138	0.0470597	0.00897479	-0.00981752	-0.0398527	-0.0995911	-0.092532	-0.0390663	-0.0791691	-0.166626	-0.122991	-0.0326566	-0.0758381	-0.124608	-0.00415863	0.0477561	-0.0303668	-0.0159109	0.102733	0.136727	0.289447	0.345022	0.279395	0.356006	0.488101	0.536773	0.421171	0.453009	0.375228	0.198344	0.117091	0.0767891	0.0288088	0.0151897	-0.0295393	-0.0788699	-0.0884635	-0.0596049	-0.00583743	0.0165978
61	0.221219	0.472246	0.692175	0.859708	1	0.830753	0.665879	0.464517	0.340715	0.255868	0.180987	0.138588	0.100573	0.0467721	-0.0246313	-0.0358349	0.0213795	-0.0126262	-0.0978941	-0.0612874	0.039496	0.0155125	-0.0466927	0.0679749	0.133115	0.0578385	0.0677533	0.182533	0.202312	0.353545	0.40728	0.297984	0.340511	0.482931	0.585339	0.504789	0.560234	0.479574	0.294946	0.231015	0.187156	0.153215	0.142498	0.0921545	0.0490275	0.0253082	0.0509815	0.106628	0.118041
62	0.183864	0.395517	0.575048	0.709429	0.830753	1	0.74404	0.510593	0.377016	0.289021	0.208837	0.15672	0.109468	0.0545613	-0.0142426	-0.0250959	0.0347903	0.0122627	-0.072672	-0.0200765	0.0863917	0.0582769	0.00221598	0.124652	0.1809	0.110504	0.138246	0.25398	0.287009	0.429636	0.483016	0.368597	0.376221	0.50184	0.636176	0.589396	0.618399	0.534344	0.339738	0.265097	0.209734	0.171485	0.159496	0.107185	0.0632472	0.0367427	0.0686082	0.129526	0.134919
63	0.123226	0.307188	0.469414	0.55178	0.665879	0.74404	1	0.761384	0.56946	0.461103	0.368273	0.281188	0.215426	0.126409	0.0405804	0.00467367	0.083824	0.0711119	0.0194298	0.0744959	0.176123	0.165087	0.106297	0.205621	0.259314	0.202166	0.213011	0.301801	0.325493	0.452323	0.491002	0.350438	0.327688	0.444893	0.608823	0.61621	0.721711	0.658983	0.48003	0.39927	0.35361	0.298138	0.29589	0.231476	0.194131	0.15638	0.189903	0.25923	0.260057
64	0.0518578	0.193859	0.320907	0.363175	0.464517	0.510593	0.761384	1	0.750271	0.573053	0.449951	0.338931	0.245236	0.144955	0.0405907	-0.0235953	0.0579639	0.0742906	0.0683323	0.149689	0.234553	0.208037	0.151564	0.246796	0.273984	0.209671	0.199392	0.25535	0.296064	0.403121	0.37786	0.261421	0.258969	0.342665	0.498675	0.462021	0.567872	0.66615	0.597063	0.479439	0.426929	0.341481	0.34995	0.283241	0.247483	0.206956	0.237261	0.309164	0.318276
65	-0.00829702	0.109739	0.201226	0.240544	0.340715	0.377016	0.56946	0.750271	1	0.803683	0.63212	0.495021	0.372472	0.238058	0.115852	0.0314518	0.128342	0.140931	0.141256	0.212278	0.283989	0.285888	0.21043	0.267552	0.300561	0.241199	0.19087	0.210745	0.235725	0.323488	0.290842	0.171303	0.16593	0.23551	0.374046	0.379069	0.490483	0.61791	0.703135	0.619413	0.612759	0.512744	0.485132	0.390583	0.339852	0.284855	0.309432	0.405969	0.426304
66	-0.0650621	0.0290439	0.109815	0.14138	0.255868	0.289021	0.461103	0.573053	0.803683	1	0.783207	0.633873	0.480653	0.319375	0.190958	0.0903004	0.194693	0.193683	0.205023	0.246746	0.315084	0.345628	0.270313	0.296582	0.332579	0.286915	0.217475	0.208781	0.218144	0.292696	0.25724	0.137634	0.117316	0.171774	0.30223	0.329637	0.427797	0.557603	0.633565	0.715788	0.693856	0.617837	0.583122	0.477745	0.446174	0.389305	0.395298	0.472249	0.49817
67	-0.112439	-0.0477933	0.0102222	0.0470597	0.180987	0.208837	0.368273	0.449951	0.63212	0.783207	1	0.777357	0.593098	0.408451	0.286394	0.176055	0.268412	0.264427	0.263177	0.253	0.312041	0.364647	0.275231	0.2579	0.311233	0.279304	0.202033	0.17913	0.164243	0.222117	0.19086	0.0657618	0.0360485	0.0897633	0.214437	0.263689	0.357745	0.455074	0.537814	0.66856	0.711872	0.720007	0.712404	0.597828	0.599844	0.538945	0.524895	0.579012	0.606024
68	-0.124992	-0.0795456	-0.0308346	0.00897479	0.138588	0.15672	0.281188	0.338931	0.495021	0.633873	0.777357	1	0.810127	0.565487	0.388181	0.258204	0.329885	0.280356	0.27555	0.235772	0.30249	0.368021	0.26289	0.235367	0.298194	0.264754	0.172732	0.156017	0.120317	0.170615	0.14009	0.0204993	-0.0102653	0.0362897	0.145449	0.205805	0.288862	0.36774	0.437777	0.581993	0.625388	0.724436	0.704329	0.607849	0.62258	0.558314	0.524667	0.556414	0.572016
69	-0.113722	-0.0767971	-0.0450412	-0.00981752	0.100573	0.109468	0.215426	0.245236	0.372472	0.480653	0.593098	0.810127	1	0.743907	0.55669	0.410582	0.419131	0.321572	0.261468	0.206862	0.265991	0.327218	0.221331	0.183828	0.244746	0.214211	0.11795	0.105973	0.0667434	0.110448	0.0869128	-0.0141105	-0.0388536	0.000380531	0.0945797	0.145689	0.213535	0.266673	0.319995	0.426565	0.492051	0.648418	0.63883	0.558246	0.579031	0.530059	0.492251	0.50659	0.517697
70	-0.111865	-0.087869	-0.0679008	-0.0398527	0.0467721	0.0545613	0.126409	0.144955	0.238058	0.319375	0.408451	0.565487	0.743907	1	0.751617	0.53201	0.437849	0.321936	0.249386	0.173651	0.228681	0.293307	0.204965	0.167012	0.219858	0.20146	0.115926	0.10347	0.0514932	0.0631041	0.0458899	-0.0398223	-0.0645591	-0.0396829	0.0318505	0.0898988	0.132497	0.173449	0.230655	0.31369	0.356905	0.485138	0.46144	0.423959	0.428231	0.384071	0.353227	0.360729	0.373922
71	-0.13778	-0.124401	-0.129655	-0.0995911	-0.0246313	-0.0142426	0.0405804	0.0405907	0.115852	0.190958	0.286394	0.388181	0.55669	0.751617	1	0.802464	0.640785	0.537722	0.366546	0.192921	0.25575	0.312732	0.196103	0.115446	0.179257	0.166332	0.0637079	0.0471217	-0.0128447	0.00497533	-0.0158796	-0.0823952	-0.11623	-0.0972239	-0.0429311	0.0199893	0.0624619	0.0780076	0.125166	0.20876	0.236039	0.365372	0.341193	0.313159	0.324724	0.289588	0.250123	0.239765	0.244721
72	-0.119623	-0.106518	-0.120691	-0.092532	-0.0358349	-0.0250959	0.00467367	-0.0235953	0.0314518	0.0903004	0.176055	0.258204	0.410582	0.53201	0.802464	1	0.772287	0.633105	0.404777	0.184396	0.24773	0.294555	0.173303	0.0901399	0.160053	0.143786	0.0478588	0.0310769	-0.035841	-0.0225931	-0.0315573	-0.0862598	-0.124356	-0.099572	-0.0553332	-0.0031475	0.0279887	0.0199963	0.041235	0.109491	0.130185	0.250616	0.254142	0.231987	0.244626	0.220256	0.195051	0.182544	0.174366
73	-0.116246	-0.0781614	-0.0733054	-0.0390663	0.0213795	0.0347903	0.083824	0.0579639	0.128342	0.194693	0.268412	0.329885	0.419131	0.437849	0.640785	0.772287	1	0.76543	0.4968	0.262758	0.329825	0.359502	0.252897	0.164918	0.206089	0.180418	0.09252	0.0687168	0.0221279	0.0417238	0.029769	-0.0373749	-0.074332	-0.0448154	0.00805376	0.0585918	0.0985055	0.102524	0.131091	0.203139	0.203658	0.297607	0.305965	0.277195	0.29241	0.273134	0.254103	0.25951	0.256349
74	-0.125747	-0.0962419	-0.0969242	-0.0791691	-0.0126262	0.0122627	0.0711119	0.0742906	0.140931	0.193683	0.264427	0.280356	0.321572	0.321936	0.537722	0.633105	0.76543	1	0.707078	0.448319	0.457441	0.476804	0.382182	0.254877	0.273493	0.270541	0.18167	0.116134	0.0857208	0.0843426	0.0487944	-0.00842102	-0.0541073	-0.0453583	0.00787315	0.0637473	0.0961971	0.118068	0.158077	0.241702	0.225276	0.279916	0.291325	0.260979	0.265318	0.231433	0.208566	0.220837	0.21303
75	-0.148861	-0.139091	-0.143935	-0.166626	-0.0978941	-0.072672	0.0194298	0.0683323	0.141256	0.205023	0.263177	0.27555	0.261468	0.249386	0.366546	0.404777	0.4968	0.707078	1	0.667156	0.562133	0.625122	0.587682	0.395271	0.365202	0.389823	0.307809	0.18746	0.172876	0.128219	0.0668068	0.0266082	-0.0412068	-0.0691376	-0.0106622	0.0500605	0.0714933	0.127258	0.180862	0.266828	0.234721	0.267216	0.263704	0.241025	0.249846	0.214817	0.179621	0.175359	0.168286
76	-0.100761	-0.0887934	-0.0823952	-0.122991	-0.0612874	-0.0200765	0.0744959	0.149689	0.212278	0.246746	0.253	0.235772	0.206862	0.173651	0.192921	0.184396	0.262758	0.448319	0.667156	1	0.727812	0.576322	0.619746	0.575846	0.419282	0.41412	0.384059	0.257182	0.312328	0.240659	0.147935	0.12775	0.0690212	0.00665759	0.0715872	0.107466	0.11469	0.195886	0.235825	0.287419	0.257291	0.251687	0.245103	0.226366	0.217024	0.17971	0.161184	0.183339	0.177047
77	-0.0836775	-0.0305596	-0.0100198	-0.0326566	0.039496	0.0863917	0.176123	0.234553	0.283989	0.315084	0.312041	0.30249	0.265991	0.228681	0.25575	0.24773	0.329825	0.457441	0.562133	0.727812	1	0.778792	0.603498	0.617173	0.555045	0.497439	0.384861	0.304928	0.339349	0.331478	0.233268	0.178158	0.121561	0.0832005	0.15819	0.197364	0.228188	0.294225	0.310865	0.364301	0.321924	0.319395	0.305703	0.272709	0.259292	0.214603	0.197748	0.229747	0.224287
78	-0.102883	-0.0631506	-0.0509994	-0.0758381	0.0155125	0.0582769	0.165087	0.208037	0.285888	0.345628	0.364647	0.368021	0.327218	0.293307	0.312732	0.294555	0.359502	0.476804	0.625122	0.576322	0.778792	1	0.788953	0.641699	0.683356	0.671814	0.501256	0.38525	0.364307	0.314554	0.237533	0.175219	0.0922131	0.060473	0.135649	0.202062	0.240012	0.290417	0.319912	0.408175	0.37179	0.383763	0.363497	0.313048	0.307905	0.253992	0.236702	0.259335	0.248109
79	-0.101368	-0.0743622	-0.0696075	-0.124608	-0.0466927	0.00221598	0.106297	0.151564	0.21043	0.270313	0.275231	0.26289	0.221331	0.204965	0.196103	0.173303	0.252897	0.382182	0.587682	0.619746	0.603498	0.788953	1	0.78639	0.673939	0.728555	0.65494	0.465621	0.463651	0.328992	0.250859	0.225098	0.126088	0.0519802	0.121311	0.182371	0.180699	0.242648	0.247453	0.327488	0.286614	0.286086	0.278603	0.243903	0.241485	0.20264	0.175085	0.183367	0.182288
80	-0.0454374	0.015127	0.0458084	-0.00415863	0.0679749	0.124652	0.205621	0.246796	0.267552	0.296582	0.2579	0.235367	0.183828	0.167012	0.115446	0.0901399	0.164918	0.254877	0.395271	0.575846	0.617173	0.641699	0.78639	1	0.791772	0.714202	0.661394	0.557549	0.599325	0.492874	0.386255	0.346858	0.258833	0.174299	0.255067	0.28555	0.279408	0.337823	0.292528	0.337919	0.282915	0.255362	0.246057	0.218975	0.196283	0.157304	0.145406	0.177202	0.177129
81	-0.0390032	0.0399859	0.0771713	0.0477561	0.133115	0.1809	0.259314	0.273984	0.300561	0.332579	0.311233	0.298194	0.244746	0.219858	0.179257	0.160053	0.206089	0.273493	0.365202	0.419282	0.555045	0.683356	0.673939	0.791772	1	0.829419	0.65908	0.617663	0.567461	0.505781	0.422217	0.34555	0.25529	0.215423	0.294479	0.335183	0.346708	0.374793	0.31914	0.384317	0.339922	0.321805	0.311126	0.268993	0.248645	0.20095	0.192794	0.226239	0.222306
82	-0.060321	-0.00579404	0.0116305	-0.0303668	0.0578385	0.110504	0.202166	0.209671	0.241199	0.286915	0.279304	0.264754	0.214211	0.20146	0.166332	0.143786	0.180418	0.270541	0.389823	0.41412	0.497439	0.671814	0.728555	0.714202	0.829419	1	0.815017	0.658709	0.547365	0.427747	0.370306	0.318251	0.205686	0.152977	0.225416	0.28108	0.275148	0.300207	0.258953	0.334452	0.292941	0.279439	0.279203	0.243954	0.232991	0.192487	0.174988	0.197802	0.193294
83	-0.0263722	0.0199888	0.0397439	-0.0159109	0.0677533	0.138246	0.213011	0.199392	0.19087	0.217475	0.202033	0.172732	0.11795	0.115926	0.0637079	0.0478588	0.09252	0.18167	0.307809	0.384059	0.384861	0.501256	0.65494	0.661394	0.65908	0.815017	1	0.780789	0.69721	0.513232	0.466199	0.41381	0.275699	0.205892	0.288189	0.345908	0.286656	0.297721	0.219286	0.268685	0.229424	0.19634	0.19622	0.173184	0.157245	0.127479	0.112849	0.131889	0.125251
84	0.0199452	0.102151	0.148678	0.102733	0.182533	0.25398	0.301801	0.25535	0.210745	0.208781	0.17913	0.156017	0.105973	0.10347	0.0471217	0.0310769	0.0687168	0.116134	0.18746	0.257182	0.304928	0.38525	0.465621	0.557549	0.617663	0.658709	0.780789	1	0.773707	0.637007	0.590614	0.522305	0.37816	0.31971	0.400241	0.430814	0.37651	0.354454	0.22188	0.254641	0.211145	0.170946	0.169644	0.140102	0.115733	0.0922249	0.0886504	0.109542	0.106487
85	0.059228	0.142146	0.207902	0.136727	0.202312	0.287009	0.325493	0.296064	0.235725	0.218144	0.164243	0.120317	0.0667434	0.0514932	-0.0128447	-0.035841	0.0221279	0.0857208	0.172876	0.312328	0.339349	0.364307	0.463651	0.599325	0.567461	0.547365	0.69721	0.773707	1	0.807345	0.697101	0.648367	0.520916	0.419852	0.500085	0.497853	0.416178	0.41824	0.265329	0.26251	0.207592	0.151002	0.139929	0.108799	0.0792912	0.0522853	0.0553915	0.088897	0.0857792
86	0.0997127	0.22443	0.33218	0.289447	0.353545	0.429636	0.452323	0.403121	0.323488	0.292696	0.222117	0.170615	0.110448	0.0631041	0.00497533	-0.0225931	0.0417238	0.0843426	0.128219	0.240659	0.331478	0.314554	0.328992	0.492874	0.505781	0.427747	0.513232	0.637007	0.807345	1	0.839145	0.692712	0.610868	0.579431	0.669174	0.62408	0.555946	0.553211	0.36049	0.330882	0.269691	0.212107	0.188557	0.138344	0.10104	0.0665228	0.0788606	0.126263	0.128745
87	0.132241	0.268062	0.384113	0.345022	0.40728	0.483016	0.491002	0.37786	0.290842	0.25724	0.19086	0.14009	0.0869128	0.0458899	-0.0158796	-0.0315573	0.029769	0.0487944	0.0668068	0.147935	0.233268	0.237533	0.250859	0.386255	0.422217	0.370306	0.466199	0.590614	0.697101	0.839145	1	0.797271	0.6561	0.666532	0.720385	0.717248	0.607989	0.541886	0.346316	0.299656	0.241023	0.18273	0.154508	0.103706	0.0627964	0.0298559	0.0467062	0.0942578	0.0958308
88	0.158688	0.254526	0.352306	0.279395	0.297984	0.368597	0.350438	0.261421	0.171303	0.137634	0.0657618	0.0204993	-0.0141105	-0.0398223	-0.0823952	-0.0862598	-0.0373749	-0.00842102	0.0266082	0.12775	0.178158	0.175219	0.225098	0.346858	0.34555	0.318251	0.41381	0.522305	0.648367	0.692712	0.797271	1	0.79911	0.665992	0.590678	0.525313	0.424997	0.377345	0.220195	0.166454	0.110321	0.0547484	0.0318742	0.00276814	-0.0391848	-0.0591957	-0.0476196	-0.0146438	-0.00715926
89	0.177677	0.308746	0.427971	0.356006	0.340511	0.376221	0.327688	0.258969	0.16593	0.117316	0.0360485	-0.0102653	-0.0388536	-0.0645591	-0.11623	-0.124356	-0.074332	-0.0541073	-0.0412068	0.0690212	0.121561	0.0922131	0.126088	0.258833	0.25529	0.205686	0.275699	0.37816	0.520916	0.610868	0.6561	0.79911	1	0.79424	0.614277	0.455742	0.38676	0.350814	0.199085	0.124262	0.0752694	0.0221577	-0.00959628	-0.039742	-0.0838389	-0.0990176	-0.081431	-0.0440906	-0.0348206
90	0.214984	0.387289	0.530261	0.488101	0.482931	0.50184	0.444893	0.342665	0.23551	0.171774	0.0897633	0.0362897	0.000380531	-0.0396829	-0.0972239	-0.099572	-0.0448154	-0.0453583	-0.0691376	0.00665759	0.0832005	0.060473	0.0519802	0.174299	0.215423	0.152977	0.205892	0.31971	0.419852	0.579431	0.666532	0.665992	0.79424	1	0.785515	0.606956	0.520586	0.460535	0.276753	0.183224	0.131185	0.076663	0.0358417	-0.00751487	-0.0611352	-0.0867586	-0.0614317	-0.00495648	0.00318126
91	0.197805	0.387822	0.549024	0.536773	0.585339	0.636176	0.608823	0.498675	0.374046	0.30223	0.214437	0.145449	0.0945797	0.0318505	-0.0429311	-0.0553332	0.00805376	0.00787315	-0.0106622	0.0715872	0.15819	0.135649	0.121311	0.255067	0.294479	0.225416	0.288189	0.400241	0.500085	0.669174	0.720385	0.590678	0.614277	0.785515	1	0.822437	0.695872	0.646126	0.412391	0.319437	0.258833	0.193985	0.161857	0.10188	0.0458993	0.0113423	0.0359131	0.102533	0.109444
92	0.132787	0.291246	0.423195	0.421171	0.504789	0.589396	0.61621	0.462021	0.379069	0.329637	0.263689	0.205805	0.145689	0.0898988	0.0199893	-0.0031475	0.0585918	0.0637473	0.0500605	0.107466	0.197364	0.202062	0.182371	0.28555	0.335183	0.28108	0.345908	0.430814	0.497853	0.62408	0.717248	0.525313	0.455742	0.606956	0.822437	1	0.787694	0.67115	0.447489	0.374461	0.31407	0.258782	0.223051	0.163687	0.115427	0.073869	0.0947496	0.160573	0.159064
93	0.103461	0.277704	0.409991	0.453009	0.560234	0.618399	0.721711	0.567872	0.490483	0.427797	0.357745	0.288862	0.213535	0.132497	0.0624619	0.0279887	0.0985055	0.0961971	0.0714933	0.11469	0.228188	0.240012	0.180699	0.279408	0.346708	0.275148	0.286656	0.37651	0.416178	0.555946	0.607989	0.424997	0.38676	0.520586	0.695872	0.787694	1	0.832961	0.570545	0.488035	0.407187	0.349197	0.310507	0.237238	0.189505	0.132498	0.155511	0.23092	0.229565
94	0.0638849	0.213859	0.347876	0.375228	0.479574	0.534344	0.658983	0.66615	0.61791	0.557603	0.455074	0.36774	0.266673	0.173449	0.0780076	0.0199963	0.102524	0.118068	0.127258	0.195886	0.294225	0.290417	0.242648	0.337823	0.374793	0.300207	0.297721	0.354454	0.41824	0.553211	0.541886	0.377345	0.350814	0.460535	0.646126	0.67115	0.832961	1	0.752668	0.612595	0.507336	0.434144	0.389577	0.304412	0.252846	0.186777	0.202982	0.287295	0.29492
95	-0.0022571	0.0870522	0.179123	0.198344	0.294946	0.339738	0.48003	0.597063	0.703135	0.633565	0.537814	0.437777	0.319995	0.230655	0.125166	0.041235	0.131091	0.158077	0.180862	0.235825	0.310865	0.319912	0.247453	0.292528	0.31914	0.258953	0.219286	0.22188	0.265329	0.36049	0.346316	0.220195	0.199085	0.276753	0.412391	0.447489	0.570545	0.752668	1	0.740619	0.595901	0.493148	0.42937	0.355362	0.299035	0.224514	0.2379	0.326945	0.337596
96	-0.05144	0.023411	0.0940541	0.117091	0.231015	0.265097	0.39927	0.479439	0.619413	0.715788	0.66856	0.581993	0.426565	0.31369	0.20876	0.109491	0.203139	0.241702	0.266828	0.287419	0.364301	0.408175	0.327488	0.337919	0.384317	0.334452	0.268685	0.254641	0.26251	0.330882	0.299656	0.166454	0.124262	0.183224	0.319437	0.374461	0.488035	0.612595	0.740619	1	0.802909	0.669535	0.562319	0.443087	0.397611	0.31791	0.319904	0.397648	0.408835
97	-0.0748224	-0.00649416	0.051707	0.0767891	0.187156	0.209734	0.35361	0.426929	0.612759	0.693856	0.711872	0.625388	0.492051	0.356905	0.236039	0.130185	0.203658	0.225276	0.234721	0.257291	0.321924	0.37179	0.286614	0.282915	0.339922	0.292941	0.229424	0.211145	0.207592	0.269691	0.241023	0.110321	0.0752694	0.131185	0.258833	0.31407	0.407187	0.507336	0.595901	0.802909	1	0.813105	0.655209	0.502421	0.464513	0.383467	0.375225	0.44959	0.472299
98	-0.101971	-0.055526	-0.00763495	0.0288088	0.153215	0.171485	0.298138	0.341481	0.512744	0.617837	0.720007	0.724436	0.648418	0.485138	0.365372	0.250616	0.297607	0.279916	0.267216	0.251687	0.319395	0.383763	0.286086	0.255362	0.321805	0.279439	0.19634	0.170946	0.151002	0.212107	0.18273	0.0547484	0.0221577	0.076663	0.193985	0.258782	0.349197	0.434144	0.493148	0.669535	0.813105	1	0.811714	0.618019	0.595985	0.514937	0.482188	0.538166	0.563665
99	-0.126876	-0.0737683	-0.0269766	0.0151897	0.142498	0.159496	0.29589	0.34995	0.485132	0.583122	0.712404	0.704329	0.63883	0.46144	0.341193	0.254142	0.305965	0.291325	0.263704	0.245103	0.305703	0.363497	0.278603	0.246057	0.311126	0.279203	0.19622	0.169644	0.139929	0.188557	0.154508	0.0318742	-0.00959628	0.0358417	0.161857	0.223051	0.310507	0.389577	0.42937	0.562319	0.655209	0.811714	1	0.830902	0.777129	0.679245	0.634883	0.694291	0.716257
[truncated: 342 more rows]
[truncated: 336 more columns]

## Sheet: nitrate_run1
Residue number	57	58	59	60	61	62	63	64	65	66	67	68	69	70	71	72	73	74	75	76	77	78	79	80	81	82	83	84	85	86	87	88	89	90	91	92	93	94	95	96	97	98	99	100	101	102	103	104	105
[truncated: 385 more rows]
[truncated: 336 more columns]

## Sheet: nitrate_run2
Residue number	57	58	59	60	61	62	63	64	65	66	67	68	69	70	71	72	73	74	75	76	77	78	79	80	81	82	83	84	85	86	87	88	89	90	91	92	93	94	95	96	97	98	99	100	101	102	103	104	105
[truncated: 385 more rows]
[truncated: 336 more columns]

## Sheet: nitrate_run3
Residue number	57	58	59	60	61	62	63	64	65	66	67	68	69	70	71	72	73	74	75	76	77	78	79	80	81	82	83	84	85	86	87	88	89	90	91	92	93	94	95	96	97	98	99	100	101	102	103	104	105
[truncated: 385 more rows]
[truncated: 336 more columns]

[truncated: 3 more sheets: nitrite_run1, nitrite_run2, nitrite_run3]
